# Supplementary material for: Larger Firms, Greater Transparency: Firm Size Moderation of Employee Investment and Migrant-Female Workplace Fatalities
Source: Research Square preprint supplement (doi:10.21203/rs.3.rs-8539006/v1), 2026-01-28
Supplement: Supplementary file 1 [file 7c53025e2a859ec3ca1295c0.xlsx]

## Sheet: Data
Series Name	Series Code	Country Name	Country Code	2005 [YR2005]	2006 [YR2006]	2007 [YR2007]	2008 [YR2008]	2009 [YR2009]	2010 [YR2010]	2011 [YR2011]	2012 [YR2012]	2013 [YR2013]	2014 [YR2014]	2015 [YR2015]	2016 [YR2016]	2017 [YR2017]	2018 [YR2018]	2019 [YR2019]	2020 [YR2020]	2021 [YR2021]	2022 [YR2022]	2023 [YR2023]	2024 [YR2024]
GDP per capita, PPP (constant 2021 international $)	NY.GDP.PCAP.PP.KD	Afghanistan	AFG	1908.11	1929.72	2155.35	2191.5	2565.02	2848.59	2757.05	2985.32	3046.58	3017.94	2967.69	2958.79	2953	2902.39	2927.25	2769.69	2144.17	1981.71	1983.81	..
GDP per capita, PPP (constant 2021 international $)	NY.GDP.PCAP.PP.KD	Albania	ALB	8964.32	9564.03	10263	11056.4	11430.6	11829.1	12153.1	12293	12525.8	12833	13157.1	13693.3	14155.9	14711.8	15079.4	14663.6	16127.7	17112.9	17992.1	18920.9
GDP per capita, PPP (constant 2021 international $)	NY.GDP.PCAP.PP.KD	Algeria	DZA	13738.5	13920.7	14114.7	14206.8	14104.4	14496.4	14642	14697.5	14778.2	15073.8	15239.5	15511.7	15427.7	15343.4	15199.2	14194.2	14496.9	14782.2	15159.3	15442.1
GDP per capita, PPP (constant 2021 international $)	NY.GDP.PCAP.PP.KD	American Samoa	ASM	..	..	..	..	..	..	..	..	..	..	..	..	..	..	..	..	..	..	..	..
GDP per capita, PPP (constant 2021 international $)	NY.GDP.PCAP.PP.KD	Andorra	AND	65114.8	66390.3	65534.1	60691.6	57204	58285.1	60470.5	58172.1	57332.2	59929.2	62105.2	64402.8	63239.7	63048.6	63215.9	55488.5	59332.2	63913.4	64631.3	65928.3
GDP per capita, PPP (constant 2021 international $)	NY.GDP.PCAP.PP.KD	Angola	AGO	7845.89	8435.46	9263.98	9916.91	9629.09	9672.84	9627.02	10051.3	10150.9	10250.6	9980.93	9381.81	9042.12	8620.21	8274.54	7556.97	7408.13	7397.49	7250.4	7344.15
GDP per capita, PPP (constant 2021 international $)	NY.GDP.PCAP.PP.KD	Antigua and Barbuda	ATG	27692.6	30827.3	33245.3	32756.3	28405.7	25826.6	25023.9	25592.9	25206.8	25557.5	25734.2	26627.7	27199.2	28878.6	29651.9	23930.7	25745.5	27941.8	28474	29561.8
GDP per capita, PPP (constant 2021 international $)	NY.GDP.PCAP.PP.KD	Argentina	ARG	23262.4	24877.2	26850.7	27658.5	25747.2	28056.3	29425.8	28826	29227.7	28200.8	28669.2	27802.1	28334.9	27367.1	26629.6	23877.1	26300.3	27628	27105	26547.1
GDP per capita, PPP (constant 2021 international $)	NY.GDP.PCAP.PP.KD	Armenia	ARM	8362.9	9525.23	10898.8	11727.5	10143.2	10438.6	10990.2	11796.3	12194	12667.4	13112.8	13193	14243.9	15037	16215.4	15052.9	15921.7	17886.2	19402.8	20078.8
GDP per capita, PPP (constant 2021 international $)	NY.GDP.PCAP.PP.KD	Aruba	ABW	40608.8	40335.4	41272.3	41710.5	36590.6	35508.6	36435.6	35530.3	37255.4	36275.7	35682.3	36021.8	38558	39419.6	38435.4	28521.7	35696.3	38877.7	40516.8	..
GDP per capita, PPP (constant 2021 international $)	NY.GDP.PCAP.PP.KD	Australia	AUS	49914.5	50602.4	51562.1	52351.6	52254.3	52589.8	53112.5	54237.6	54699.4	55288.1	55691.7	56341.5	56684.6	57450.4	57837.1	57059.7	58182.3	59883.6	60461.2	60082
GDP per capita, PPP (constant 2021 international $)	NY.GDP.PCAP.PP.KD	Austria	AUT	56959.6	58531.5	60544.6	61232.5	58882.1	59803.4	61347	61451.5	60937.3	60919.8	61026	61647.8	62612.1	63855.8	64688.1	60349.9	62968.9	65661.5	64394.1	63314.5
GDP per capita, PPP (constant 2021 international $)	NY.GDP.PCAP.PP.KD	Azerbaijan	AZE	10054.1	13371.7	16587.4	17963	19242.4	19925.4	19358.1	19523.4	20398.6	20709.2	20678.8	19822.4	19659	19781.9	20101.5	19126.1	20111.4	21051.2	21310.7	22072.1
GDP per capita, PPP (constant 2021 international $)	NY.GDP.PCAP.PP.KD	Bahamas, The	BHS	35365.4	35789	35797	34497.9	32630.2	32711.4	32535.6	33667.5	32402.8	32712.7	32777.4	32172.2	33049.9	33650.2	33202.4	26452.5	31064.7	34342.8	35221.3	36244
GDP per capita, PPP (constant 2021 international $)	NY.GDP.PCAP.PP.KD	Bahrain	BHR	53478.3	52691.9	52731.8	52765.4	50665.8	50704.8	53132.3	54516.8	55376.4	55065.8	54149.9	54107.1	53859.8	54893.1	56750	53814.2	54954.7	57573	57819.9	59129.1
GDP per capita, PPP (constant 2021 international $)	NY.GDP.PCAP.PP.KD	Bangladesh	BGD	3231.61	3407.43	3608.92	3787.94	3942.14	4125.46	4352.43	4592.05	4822.73	5068.64	5352.71	5682.54	6005.71	6392.59	6838.33	7015.2	7441.07	7888.16	8242.4	8486.78
GDP per capita, PPP (constant 2021 international $)	NY.GDP.PCAP.PP.KD	Barbados	BRB	19488	20571.8	20900	20922.4	19770.5	19253.4	19050.6	18936.1	18695.7	18665.2	18464.7	18754.7	18740.3	18484.7	18572.5	15749	15683.9	18469.6	19224.5	19945.7
GDP per capita, PPP (constant 2021 international $)	NY.GDP.PCAP.PP.KD	Belarus	BLR	16579.9	18349.9	20019.6	22137.9	22236.8	24012.6	25404.8	25879.1	26147.6	26564.4	25513.2	24846.8	25504	26363.5	26798.8	26731.5	27611.2	26537.5	27782.4	29037.5
GDP per capita, PPP (constant 2021 international $)	NY.GDP.PCAP.PP.KD	Belgium	BEL	54370.9	55392.1	57008.6	56812.8	55283.1	56265	56610.3	56381.7	56288	57028.1	57534.4	57927	58555.2	59383.9	60506.7	57358.8	60669.2	62744.2	62920.6	63083.2
GDP per capita, PPP (constant 2021 international $)	NY.GDP.PCAP.PP.KD	Belize	BLZ	12702.7	12900.1	12962.5	12398.5	12024.2	11868.4	11584.3	11761.6	12026.1	12249.2	12339.5	12062.8	11574.5	11486.8	11803.1	10032.5	11677.5	12569.8	12455.3	13277.9
GDP per capita, PPP (constant 2021 international $)	NY.GDP.PCAP.PP.KD	Benin	BEN	2632.47	2652.22	2729.14	2777.62	2758.07	2733.57	2732.01	2779.73	2893.05	2987.38	2952	2962.66	3041.78	3155.45	3281.1	3317.86	3464.29	3588.33	3721.21	3901.33
GDP per capita, PPP (constant 2021 international $)	NY.GDP.PCAP.PP.KD	Bermuda	BMU	109335	115171	118691	115943	108963	105969	101990	96711.1	96549.8	93042.3	93859.9	93265.1	96437.2	95639.2	95519.9	88618.1	92319.7	98145.2	103052	105323
GDP per capita, PPP (constant 2021 international $)	NY.GDP.PCAP.PP.KD	Bhutan	BTN	6850.8	7140.86	8195.07	8470.03	9019.12	9985.28	10714.7	11143.9	11212.5	11744.5	12400.3	13321	13482.3	13854.9	14555.2	12979.9	13458.8	14061.3	14645.3	..
GDP per capita, PPP (constant 2021 international $)	NY.GDP.PCAP.PP.KD	Bolivia	BOL	6579.31	6778.38	6967.57	7272.17	7392.16	7571.68	7837.49	8108.21	8524.03	8851.71	9141.93	9390.79	9642.81	9907.06	9985.23	9000.98	9454.2	9681.71	9843.97	9844.28
GDP per capita, PPP (constant 2021 international $)	NY.GDP.PCAP.PP.KD	Bosnia and Herzegovina	BIH	9811.77	10427.5	11175.4	11980.4	11823.4	12139.5	12484.2	12623.5	13132.1	13455.2	14220.4	14873.9	15555	16349.1	17029.6	16747.4	18286.7	19298.2	19805	20429.7
GDP per capita, PPP (constant 2021 international $)	NY.GDP.PCAP.PP.KD	Botswana	BWA	14362	15275.6	15850.2	16040.3	13490	14545	15236.7	14957.6	16369.4	17052.2	15995	16905.6	17352.9	17825	18106	16289.4	17960.6	18647.4	18932.5	18068.5
GDP per capita, PPP (constant 2021 international $)	NY.GDP.PCAP.PP.KD	Brazil	BRA	15221	15657.5	16440.6	17113.4	16939.4	18062.2	18627.8	18832.2	19241.5	19183.2	18357.1	17620.9	17724.5	17917.7	18018.6	17327.5	18075.7	18554	19079.8	19647.9
GDP per capita, PPP (constant 2021 international $)	NY.GDP.PCAP.PP.KD	British Virgin Islands	VGB	..	..	..	..	..	..	..	..	..	..	..	..	..	..	..	..	..	..	..	..
GDP per capita, PPP (constant 2021 international $)	NY.GDP.PCAP.PP.KD	Brunei Darussalam	BRN	99795.7	102249	96752.6	91275.5	87875.8	88586.5	90279.7	89718.5	86606.7	83310.6	81910.2	78880.6	78966.9	78099.1	80228.2	80280.9	78248.8	76357.8	76616.7	79184.1
GDP per capita, PPP (constant 2021 international $)	NY.GDP.PCAP.PP.KD	Bulgaria	BGR	17672.2	19018.3	20433.5	21838.8	21244.2	21717.1	22313.7	22611.4	22946.8	23447.8	24554.6	25628.3	26683	27741.1	29201.5	28547.4	30973.7	32435	33141.8	34085.2
GDP per capita, PPP (constant 2021 international $)	NY.GDP.PCAP.PP.KD	Burkina Faso	BFA	1665	1714.76	1731.93	1779.33	1779.32	1873.97	1939.87	2003.66	2057.06	2083.2	2101.7	2162.73	2232.29	2316.39	2391.54	2380.93	2486.43	2466.05	2482.07	2547.93
GDP per capita, PPP (constant 2021 international $)	NY.GDP.PCAP.PP.KD	Burundi	BDI	938.382	954.191	951.29	957.223	944.63	947.621	951.188	958.657	970.375	977.766	918.557	897.459	880.993	868.556	855.733	833.92	836.666	829.387	828.583	835.621
GDP per capita, PPP (constant 2021 international $)	NY.GDP.PCAP.PP.KD	Cabo Verde	CPV	5565.77	5941.38	6767.41	7169.14	6994.57	7072.12	7325.78	7397.82	7440.66	7491.02	7560.14	7881.3	8234.56	8531.13	9111.63	7207.87	7685.42	8850.11	9280.98	9907.59
GDP per capita, PPP (constant 2021 international $)	NY.GDP.PCAP.PP.KD	Cambodia	KHM	2781.89	3041.1	3308.16	3501.93	3587.61	3711.54	3921.98	4159.16	4419.4	4702.73	4968.57	5283.73	5632.03	6050.59	6448.88	6128.78	6225.53	6458.37	6695.29	7011.58
GDP per capita, PPP (constant 2021 international $)	NY.GDP.PCAP.PP.KD	Cameroon	CMR	4199.72	4241.52	4302.62	4300.27	4286.58	4286.58	4307.85	4382.11	4473.57	4588.49	4698.67	4767.13	4797.98	4851.48	4882.36	4763.48	4793.56	4843.65	4870.57	4919.14
GDP per capita, PPP (constant 2021 international $)	NY.GDP.PCAP.PP.KD	Canada	CAN	52356.6	53195.8	53761.9	53711.7	51552.4	52558.4	53681.1	54034.8	54712.2	55723.5	55660.9	55606.2	56612.3	57337.5	57583.8	54092.9	56995.1	58321.1	57517.4	56691.9
GDP per capita, PPP (constant 2021 international $)	NY.GDP.PCAP.PP.KD	Cayman Islands	CYM	..	92169.9	92300.5	89338.3	80594.1	76259	75059.7	73948	72954.5	73017.6	73281	73907.2	74564.7	76088.9	77440.6	72149.3	74150.9	76359.1	78109.4	..
GDP per capita, PPP (constant 2021 international $)	NY.GDP.PCAP.PP.KD	Central African Republic	CAF	1219.59	1251.87	1284.55	1283.27	1402.68	1479.41	1517.15	1577.98	996.896	1001.86	1043.92	1073.94	1103.87	1125.7	1145.1	1136.57	1128.55	1136.8	1132.68	1111.65
GDP per capita, PPP (constant 2021 international $)	NY.GDP.PCAP.PP.KD	Chad	TCD	2695.81	2586.99	2608.27	2596.86	2472.18	2717.51	2742.7	2887.75	2864.72	2821.28	2823.36	2623.12	2496.49	2552.61	2604.92	2513.02	2435.07	2655.71	2641.43	2605.77
GDP per capita, PPP (constant 2021 international $)	NY.GDP.PCAP.PP.KD	Channel Islands	CHI	..	..	..	..	..	..	..	..	..	..	..	..	..	..	..	..	..	..	..	..
GDP per capita, PPP (constant 2021 international $)	NY.GDP.PCAP.PP.KD	Chile	CHL	20918.5	21968.5	22878.9	23509.8	23013.6	24116.8	25366.3	26670.5	27291.4	27505	27811.4	27958.7	27893	28492.7	28218.5	26248.6	29089.9	29569.5	29563.7	30182.8
GDP per capita, PPP (constant 2021 international $)	NY.GDP.PCAP.PP.KD	China	CHN	6298.32	7057.1	8013.72	8743.74	9518.43	10476.3	11405	12217.9	13080.8	13968.6	14856.8	15772.8	16758	17806.8	18820.5	19215.2	20843.3	21499.4	22687.1	23845.6
GDP per capita, PPP (constant 2021 international $)	NY.GDP.PCAP.PP.KD	Colombia	COL	11999.3	12636.6	13318.3	13591.1	13586.8	14037.1	14852.4	15279.5	15912.2	16480.4	16821.4	17003.2	16986	17104.1	17336.8	15861.5	17383.1	18458.7	18383	18503.7
GDP per capita, PPP (constant 2021 international $)	NY.GDP.PCAP.PP.KD	Comoros	COM	2441.14	2455.72	2426.52	2473.09	2581.66	2652.36	2752.95	2868.4	3059.12	3109.9	3105.59	3127.13	3236.99	3303.26	3357.9	3424.54	3449.04	3478.17	3516.48	3567.51
GDP per capita, PPP (constant 2021 international $)	NY.GDP.PCAP.PP.KD	Congo, Dem. Rep.	COD	918.535	938.041	967.054	996.744	993.998	1031.25	1066.58	1104.66	1158.28	1225.7	1267.91	1253.16	1253.19	1282.48	1296.95	1277.63	1313.62	1385.46	1456.48	1504.14
GDP per capita, PPP (constant 2021 international $)	NY.GDP.PCAP.PP.KD	Congo, Rep.	COG	7876.12	8192.58	7375.82	7587.29	8138.45	8583.66	8492.42	9079.69	8798.49	9159.26	8977.71	8001.83	7372.77	7029.34	6939.37	6350.51	6263.21	6205.11	6172.29	6181.47
GDP per capita, PPP (constant 2021 international $)	NY.GDP.PCAP.PP.KD	Costa Rica	CRI	15704	16620.1	17743.6	18334	17932.6	18660.9	19254.9	19960.8	20232.3	20724.9	21254.8	21925.6	22622.6	23005.3	23364.8	22211.9	23852.9	24831.7	25979.6	26973.4
GDP per capita, PPP (constant 2021 international $)	NY.GDP.PCAP.PP.KD	Cote d'Ivoire	CIV	4032.25	4049.26	3999.69	4096.72	4151.05	4338.65	4017.41	4234.18	4597.19	4907.57	5110.86	5320.85	5556.11	5670.2	5894.88	5787.82	6045.2	6272.26	6511.75	6733.15
GDP per capita, PPP (constant 2021 international $)	NY.GDP.PCAP.PP.KD	Croatia	HRV	27643.2	29041	30513.9	31118.3	29028.4	28706.2	28777.3	28262.5	28403.3	28462.4	29473.4	30826.6	32353.7	33732.8	35125.5	32495.5	36932.6	39864.1	41137.5	42633.8
GDP per capita, PPP (constant 2021 international $)	NY.GDP.PCAP.PP.KD	Cuba	CUB	..	..	..	..	..	..	..	..	..	..	..	..	..	..	..	..	..	..	..	..
GDP per capita, PPP (constant 2021 international $)	NY.GDP.PCAP.PP.KD	Curacao	CUW	33651.5	33334.9	33490.3	33795.1	33397.4	33004.6	32704.4	32320.9	31753.4	31128.6	30861.3	30209.8	29729.1	29256.8	28659.7	23751.5	25163.9	27587.2	27675.6	..
GDP per capita, PPP (constant 2021 international $)	NY.GDP.PCAP.PP.KD	Cyprus	CYP	41365.7	42598.9	43827.5	44299.4	42257	42105.9	41216.2	39193.6	36696.9	36444.1	37905.3	40212.2	42131	44230.5	46198.2	44206.4	48784.1	51591.4	52193.9	53255.5
GDP per capita, PPP (constant 2021 international $)	NY.GDP.PCAP.PP.KD	Czechia	CZE	35535.7	37786.9	39629	40328.3	38175.1	39097.4	39708.2	39347	39317.6	40158	42066.6	43069.5	45177.5	46301.1	47763.6	45119.9	47796	48390.7	47509.5	47961.8
GDP per capita, PPP (constant 2021 international $)	NY.GDP.PCAP.PP.KD	Denmark	DNK	60635.6	62743.2	63082.2	62451.1	59027.8	59696.4	60230.4	60000.9	60583.4	61047.3	61893.2	63299.3	64815.7	65694.8	66580.2	65204.5	69715.2	70233.6	71454.5	73709
GDP per capita, PPP (constant 2021 international $)	NY.GDP.PCAP.PP.KD	Djibouti	DJI	..	..	..	..	..	..	..	..	4469.07	4705.05	4961.87	5226.5	5421.96	5590.5	5809.3	5791.48	5960.11	6180.68	6545.1	6841.17
GDP per capita, PPP (constant 2021 international $)	NY.GDP.PCAP.PP.KD	Dominica	DMA	15080.5	15727.7	16560.5	17738	17534	17516.8	17475	17431.1	17282.6	17520.9	16920.9	17364.1	16314.2	16877.1	17619.4	14919.5	15809	17550.8	18278.2	18739.4
GDP per capita, PPP (constant 2021 international $)	NY.GDP.PCAP.PP.KD	Dominican Republic	DOM	12022.5	12961.9	13754.9	14030.1	13992.4	14975	15258.1	15487.3	16054.8	16993.6	17973.2	18969	19501.9	20662.8	21451.3	19545.4	22053.5	22987	23282.5	24229.5
GDP per capita, PPP (constant 2021 international $)	NY.GDP.PCAP.PP.KD	Ecuador	ECU	10660.2	10933.5	10952.8	11474.5	11403.5	11665.7	12449.1	12961	13689.2	14064.8	13881.6	13586.5	14179.2	14083.5	13870.5	12440.3	13507.4	14186.6	14343	13935.5
GDP per capita, PPP (constant 2021 international $)	NY.GDP.PCAP.PP.KD	Egypt, Arab Rep.	EGY	10700.6	11211.8	11782	12391.6	12728.1	13129	13082.4	13076.8	13058.1	13136.4	13425.9	13727.3	14018.4	14488.2	15026.6	15309.2	15579	16360.4	16691.4	16798.2
GDP per capita, PPP (constant 2021 international $)	NY.GDP.PCAP.PP.KD	El Salvador	SLV	8050.53	8404.25	8548.83	8704.81	8494.5	8648.93	8943.06	9165.42	9327.56	9451.74	9646.15	9863.76	10064.8	10297.2	10543.9	9692.45	10809.7	11085.6	11424.6	11669.1
GDP per capita, PPP (constant 2021 international $)	NY.GDP.PCAP.PP.KD	Equatorial Guinea	GNQ	31303	32251.8	35540.4	39994.6	38706.6	33668.9	34341.9	35711.5	32894.4	31765.9	27797.8	24435.1	22250.4	20165.5	18446.6	17089.2	16821.4	16932.8	15688.2	15454.4
GDP per capita, PPP (constant 2021 international $)	NY.GDP.PCAP.PP.KD	Eritrea	ERI	..	..	..	..	..	..	..	..	..	..	..	..	..	..	..	..	..	..	..	..
GDP per capita, PPP (constant 2021 international $)	NY.GDP.PCAP.PP.KD	Estonia	EST	30473.8	33646.6	36359.5	34588.6	29585.1	30379.1	32789.4	34115.4	34838.4	36090.5	36729.8	37854.8	39939.5	41273.2	42652.5	41340.8	44251.5	43690.4	41706.5	41546.1
GDP per capita, PPP (constant 2021 international $)	NY.GDP.PCAP.PP.KD	Eswatini	SWZ	7189.97	7582.76	7873.57	7884.86	7957.09	8210.7	8348.77	8752.11	9040.76	9119.66	9253.29	9629.56	9696.55	9632.16	10123.3	9727.51	9946.04	9955.71	10201.6	10367.3
GDP per capita, PPP (constant 2021 international $)	NY.GDP.PCAP.PP.KD	Ethiopia	ETH	952.116	1024.73	1109.14	1193.75	1262.46	1381.19	1492.53	1576.77	1696.87	1821.39	1957.41	2084.84	2222.83	2311.17	2437.97	2516.55	2588.41	2655.59	2757.96	2884.26
GDP per capita, PPP (constant 2021 international $)	NY.GDP.PCAP.PP.KD	Faroe Islands	FRO	..	..	..	53528.8	50836	50782.3	52716.9	56744.7	60123.7	63151.5	63139.8	63286.6	64574.5	65297.3	67210.4	65136.6	67770.5	69371	70429	..
GDP per capita, PPP (constant 2021 international $)	NY.GDP.PCAP.PP.KD	Fiji	FJI	10127.1	10222.2	10051	10092.2	9910.17	10167.3	10413	10537.7	11019.3	11621.1	12131.1	12419.8	13090.5	13613	13567.5	11255	10685.2	12762.3	13652.5	14104.4
GDP per capita, PPP (constant 2021 international $)	NY.GDP.PCAP.PP.KD	Finland	FIN	52744	54654	57313.3	57494.6	52599.1	54017.9	55053.4	53957.7	53183.4	52710.7	52782.5	53984.6	55637.2	56226.3	56922.5	55424.9	56790.4	57068.3	56246.4	55628.7
GDP per capita, PPP (constant 2021 international $)	NY.GDP.PCAP.PP.KD	France	FRA	48257.5	49223.2	50157.8	50068.3	48405	49130.4	50085.7	49935.6	50066.5	50326.6	50682.9	50984.1	51895.6	52561	53448.6	49311.3	52517.3	53691.6	54017.9	54465
GDP per capita, PPP (constant 2021 international $)	NY.GDP.PCAP.PP.KD	French Polynesia	PYF	..	..	..	..	..	..	..	..	..	..	..	..	..	..	..	..	..	..	..	..
GDP per capita, PPP (constant 2021 international $)	NY.GDP.PCAP.PP.KD	Gabon	GAB	20385.3	19224.1	19751.9	18493.1	17911.1	18530.6	19153.1	19450.4	19836.5	20009	20147.7	19988.2	19555.7	19225.6	19491.4	18681.5	18523.6	18662	18702.7	18923.1
GDP per capita, PPP (constant 2021 international $)	NY.GDP.PCAP.PP.KD	Gambia, The	GMB	2653.64	2564.69	2567.16	2649.61	2745.33	2824.21	2519.84	2574.94	2572.45	2465.11	2495.96	2478.46	2533.19	2651.43	2750.82	2702.32	2777.8	2863.18	2932.28	3030.97
GDP per capita, PPP (constant 2021 international $)	NY.GDP.PCAP.PP.KD	Georgia	GEO	8485.59	9337.99	10567.3	10856.1	10553.1	11294.4	12288.7	13194	13913	14475.3	14936.8	15443	16237.6	17228.7	18186.9	17031.1	18915.7	20966.5	22590.5	25000.6
GDP per capita, PPP (constant 2021 international $)	NY.GDP.PCAP.PP.KD	Germany	DEU	51289.3	53327	54941.6	55547.3	52600.2	54865.4	57992.4	58158.1	58223.6	59239.3	59699.3	60578.3	61991.5	62495.5	62970.7	60342.7	62530.8	62932	62686.5	62829.8
GDP per capita, PPP (constant 2021 international $)	NY.GDP.PCAP.PP.KD	Ghana	GHA	3721.31	3857.86	3923.13	4174.78	4269.16	4495.69	5005.37	5339.71	5593.77	5619.07	5607.37	5666.08	5993.63	6234.51	6508.25	6412.69	6607.5	6728.45	6808.54	7061.93
GDP per capita, PPP (constant 2021 international $)	NY.GDP.PCAP.PP.KD	Gibraltar	GIB	..	..	..	..	..	..	..	..	..	..	..	..	..	..	..	..	..	..	..	..
GDP per capita, PPP (constant 2021 international $)	NY.GDP.PCAP.PP.KD	Greece	GRC	38147	40483.2	41796.2	41709.4	39886.2	37566.7	33906.5	31250.2	30762.4	31213.4	31348	31468.6	31995.4	32722.3	33502.8	30487.1	33531.2	35906.6	36854.5	37752.6
GDP per capita, PPP (constant 2021 international $)	NY.GDP.PCAP.PP.KD	Greenland	GRL	52189	55243.7	56763.2	60506.2	61035.6	61863.3	61170.9	62111.1	61659.6	64799.3	63364.1	66245.7	66297.2	66887.7	68534.9	68533.7	69302	70681.2	71037.5	..
GDP per capita, PPP (constant 2021 international $)	NY.GDP.PCAP.PP.KD	Grenada	GRD	14220.6	13602.7	14385.1	14472.4	13471.8	13363.1	13406.1	13169.5	13394.5	14296.7	15146	15650.4	16301.5	16975.2	17047.4	14656.7	15298.1	16386.5	17128.7	17742.2
GDP per capita, PPP (constant 2021 international $)	NY.GDP.PCAP.PP.KD	Guam	GUM	..	..	..	..	..	..	..	..	..	..	..	..	..	..	..	..	..	..	..	..
GDP per capita, PPP (constant 2021 international $)	NY.GDP.PCAP.PP.KD	Guatemala	GTM	9099.72	9386	9772.81	9889.57	9740.71	9825.02	10032.1	10126.8	10297.8	10553.6	10786	10872.6	11005.5	11192.4	11466.4	11097.2	11825.1	12147.9	12384.9	12640.9
GDP per capita, PPP (constant 2021 international $)	NY.GDP.PCAP.PP.KD	Guinea	GIN	2501.22	2478.61	2587	2629.54	2537.31	2594.83	2673.41	2762.9	2802.56	2834.97	2869.85	3099.79	3332.77	3455.65	3557.46	3630.99	3738.81	3792.01	3904.82	4028.48
GDP per capita, PPP (constant 2021 international $)	NY.GDP.PCAP.PP.KD	Guinea-Bissau	GNB	2035.68	2040.17	2040.94	2080.14	2077.56	2138.03	2250.92	2154.3	2166.01	2130.19	2203.49	2265.57	2314.16	2344.87	2418.1	2413.68	2483.85	2564.42	2619.41	2685.62
GDP per capita, PPP (constant 2021 international $)	NY.GDP.PCAP.PP.KD	Guyana	GUY	8256.53	8702.33	9354.08	9546.71	9924.53	10374.4	10958.9	11535	11896.9	12030.1	12040.1	12420.5	12801.6	12980.4	13402.4	19234.1	22865.9	37068.2	49312.4	70297.4
GDP per capita, PPP (constant 2021 international $)	NY.GDP.PCAP.PP.KD	Haiti	HTI	3163.11	3164.82	3258.37	3289.71	3426.39	3195.25	3320.35	3285.71	3376.64	3423.65	3422.1	3435.73	3474.35	3485.7	3381.58	3229.48	3134.95	3047.65	2956.46	2800.66
GDP per capita, PPP (constant 2021 international $)	NY.GDP.PCAP.PP.KD	Honduras	HND	5056.68	5263.15	5461.9	5566.71	5313.76	5396.07	5488.43	5600.61	5644.13	5705.16	5812.53	5926.49	6099.61	6219.28	6264.02	5603.26	6202.98	6352.59	6467.88	6585.86
GDP per capita, PPP (constant 2021 international $)	NY.GDP.PCAP.PP.KD	Hong Kong SAR, China	HKG	47938.9	50981.8	53813.1	54630.4	53172.3	56355.4	58672.8	59015.3	60601.6	61839.8	62779.7	63749.4	65662.8	66993.9	65388.3	61328.5	65884.9	64036.7	64428.7	66171.4
GDP per capita, PPP (constant 2021 international $)	NY.GDP.PCAP.PP.KD	Hungary	HUN	27765.8	28903	29044.1	29384	27446	27801.8	28415.1	28179.7	28891	30264.9	31485.6	32379	33828.7	35798	37662.7	36119.5	38887.2	40657	40368.6	40702.2
GDP per capita, PPP (constant 2021 international $)	NY.GDP.PCAP.PP.KD	Iceland	ISL	55333.2	57463.7	60765.2	60963.5	56099.6	54589	55427	55719.3	57707.4	58031.9	59978.3	62880.3	63999.2	65354.3	65122.8	59627.2	61610.2	65475.4	67177.2	65645.1
GDP per capita, PPP (constant 2021 international $)	NY.GDP.PCAP.PP.KD	India	IND	3881.97	4129.78	4379.7	4450.39	4731.36	5059.28	5249.55	5460.44	5732.24	6079.84	6488.15	6940.63	7326.61	7714.34	7930.09	7399.53	8050.02	8594.39	9301.76	9817.07
GDP per capita, PPP (constant 2021 international $)	NY.GDP.PCAP.PP.KD	Indonesia	IDN	7140.85	7434.49	7802.46	8165.06	8435.46	8848.22	9274.97	9708.61	10121.8	10504.4	10893.7	11319.7	11772.6	12262.2	12757.8	12388.5	12757.1	13334.3	13890	14470.4
GDP per capita, PPP (constant 2021 international $)	NY.GDP.PCAP.PP.KD	Iran, Islamic Rep.	IRN	13056.2	13416.8	14275.7	14138.8	14105	14737.2	14941.3	14202.6	13804.8	14299.6	13905.2	14915.6	15108.1	14642.5	14040.7	14397.2	14951.9	15331.3	15912	16224
GDP per capita, PPP (constant 2021 international $)	NY.GDP.PCAP.PP.KD	Iraq	IRQ	10078.4	10568.9	10853.8	11511.9	11470.5	11816.8	12267.6	13357	13712.9	13536.8	13516	15016.1	14417.6	14456.2	14910.2	12827.6	12731.8	13433.4	13202.3	12725
GDP per capita, PPP (constant 2021 international $)	NY.GDP.PCAP.PP.KD	Ireland	IRL	63771.6	65171.5	66676.5	62401.4	58623.1	59285.8	60001.1	59509	60494.2	65660.2	81053.4	80997.6	87942.4	93214.3	96369.6	101971	116904	124489	115505	115337
GDP per capita, PPP (constant 2021 international $)	NY.GDP.PCAP.PP.KD	Isle of Man	IMN	..	..	..	..	..	..	..	..	..	..	..	..	..	..	..	..	..	..	..	..
GDP per capita, PPP (constant 2021 international $)	NY.GDP.PCAP.PP.KD	Israel	ISR	33512.9	34770	36317.9	36827.9	36403.2	37722.4	39075.4	39299.4	40148.8	40872.6	40967.4	41963.7	42947.1	43814.3	44580.8	42915.9	46162.1	48098.2	47527.2	47338.8
GDP per capita, PPP (constant 2021 international $)	NY.GDP.PCAP.PP.KD	Italy	ITA	51585.6	52304.2	52747.2	51806.4	48774.4	49301.7	49473	47796	46833.4	46825.7	47311.8	47987.8	48849.2	49133.1	49690.6	45505.1	49825.4	52333.3	52725.7	53115.1
GDP per capita, PPP (constant 2021 international $)	NY.GDP.PCAP.PP.KD	Jamaica	JAM	10119.5	10359.3	10458	10328	9838.25	9654.07	9778.69	9676.85	9687.61	9719.3	9778.12	9886.55	9964.39	10137.1	10216.1	9178.32	9577.16	10072	10332.1	10260
GDP per capita, PPP (constant 2021 international $)	NY.GDP.PCAP.PP.KD	Japan	JPN	41075.8	41613.1	42182.2	41645.6	39279.5	40881.8	40967.3	41596.9	42492.2	42674.7	43386.7	43736.1	44505.3	44848.5	44730.9	42992.5	44355.3	44972.3	45858.7	46097.4
GDP per capita, PPP (constant 2021 international $)	NY.GDP.PCAP.PP.KD	Jordan	JOR	9839.69	9977.76	10161.4	10641.6	10938.5	10953.5	10977.5	11086	10799.4	10149	9581.69	9321.9	9339.81	9311.53	9288.53	9022.64	9182.5	9266.58	9381.35	9520.25
GDP per capita, PPP (constant 2021 international $)	NY.GDP.PCAP.PP.KD	Kazakhstan	KAZ	20565.5	22574.3	24351.3	24895.7	24901.4	26374.8	27946.2	28881.2	30177.5	30986.4	30893.8	30758.3	31524.4	32330.2	33298.2	32011.5	32945.9	33506.3	34703.2	35905.4
GDP per capita, PPP (constant 2021 international $)	NY.GDP.PCAP.PP.KD	Kenya	KEN	3844.74	3970.73	4116.45	4002.88	4012.19	4211.52	4307.11	4387.94	4443.37	4558.55	4679.62	4770.31	4846.86	5017.67	5171.71	5057.4	5338.85	5491.69	5682.99	5823.41
GDP per capita, PPP (constant 2021 international $)	NY.GDP.PCAP.PP.KD	Kiribati	KIR	2183.78	2264.16	2286.45	2172.36	2137.97	2119.64	2150.38	2242.01	2382.37	2381.35	2615.84	2761.93	2822.67	2877.6	2927.48	2834.69	3020.49	3107.78	3140.58	3257.14
GDP per capita, PPP (constant 2021 international $)	NY.GDP.PCAP.PP.KD	Korea, Dem. People's Rep.	PRK	..	..	..	..	..	..	..	..	..	..	..	..	..	..	..	..	..	..	..	..
GDP per capita, PPP (constant 2021 international $)	NY.GDP.PCAP.PP.KD	Korea, Rep.	KOR	31319.1	32795.2	34522.3	35293.4	35390.6	37611	38698.5	39420.4	40483.3	41518.1	42459.9	43538	44787.6	45890.4	46757.3	46361.6	48419.6	49777.9	50414.2	..
GDP per capita, PPP (constant 2021 international $)	NY.GDP.PCAP.PP.KD	Kosovo	XKX	..	..	..	7098.4	7481.46	7877.1	8359.94	8431.66	8828.28	9150.75	9824.99	10434.9	10856.3	11188.2	11774.1	11137.5	12362.4	13022.5	14240.2	16380.9
GDP per capita, PPP (constant 2021 international $)	NY.GDP.PCAP.PP.KD	Kuwait	KWT	78193.9	79521.3	79474.8	77036.5	67896.3	62956.2	64844.5	64908.3	62458.8	60065.7	57763.5	56936.6	52285.6	51623.8	51380.6	49372.6	50652	51379.9	47777.4	45426.9
GDP per capita, PPP (constant 2021 international $)	NY.GDP.PCAP.PP.KD	Kyrgyz Republic	KGZ	4156.96	4240.17	4558.71	4894.94	4969.96	4876.48	5092.85	4993.39	5418.54	5513.75	5600.21	5715.01	5861.22	5951.83	6087.6	5537.8	5736.48	6139.78	6575.78	7046.31
GDP per capita, PPP (constant 2021 international $)	NY.GDP.PCAP.PP.KD	Lao PDR	LAO	3630.56	3881.54	4112.25	4367.16	4625.07	4946.11	5266.88	5608.97	5974.47	6341.21	6703.74	7063.26	7432.46	7775.09	8075.28	7995.6	8080.44	8183.03	8372.16	8610.9
GDP per capita, PPP (constant 2021 international $)	NY.GDP.PCAP.PP.KD	Latvia	LVA	23213.4	26431.8	29423.7	28727	24520.7	24119.7	25308.7	27496.5	28375.2	29243.7	30599.6	31668.5	33036.4	34729.7	35208.2	34225.9	36912	37681	38796.6	38936
GDP per capita, PPP (constant 2021 international $)	NY.GDP.PCAP.PP.KD	Lebanon	LBN	13024.7	13003.7	13941.6	14955.1	16264.4	17390.8	17353.2	17323.3	16396.5	15205.9	14980	15572.4	16128.6	16290.1	15659.6	12507.4	11599.8	11474.8	11330.3	..
GDP per capita, PPP (constant 2021 international $)	NY.GDP.PCAP.PP.KD	Lesotho	LSO	2275.02	2381.02	2470.31	2589.17	2538.19	2651.38	2749.32	2894.23	2914.38	2930.62	2986.96	3057.26	2924.68	2846.42	2773.29	2517.11	2544.78	2577.55	2595.83	2637.92
GDP per capita, PPP (constant 2021 international $)	NY.GDP.PCAP.PP.KD	Liberia	LBR	1335.62	1364.6	1422.1	1463.12	1493	1538.85	1601.03	1668.97	1774.52	1750.14	1714.09	1653.31	1661.3	1647.97	1575.77	1497.38	1539.21	1579	1616.92	1658.26
GDP per capita, PPP (constant 2021 international $)	NY.GDP.PCAP.PP.KD	Libya	LBY	20644	21539.6	22416.1	21909.4	20513.6	21110	10739.1	20595.6	16553.1	12495.8	12192.1	11828.7	15424.1	16380.9	14333.4	9976.04	12641.5	11456.1	12478.1	12275.9
GDP per capita, PPP (constant 2021 international $)	NY.GDP.PCAP.PP.KD	Liechtenstein	LIE	..	..	..	..	..	..	..	..	..	..	..	..	..	..	..	..	..	..	..	..
GDP per capita, PPP (constant 2021 international $)	NY.GDP.PCAP.PP.KD	Lithuania	LTU	23944.7	26129.3	29370.8	30445.8	26217.5	26887.5	29240.7	30920.3	32474.6	33975.1	35251.3	36618.1	38774.5	41019.8	43062.3	43091.8	45873.5	46651.2	46159.7	47169
GDP per capita, PPP (constant 2021 international $)	NY.GDP.PCAP.PP.KD	Luxembourg	LUX	124867	130285	138678	135812	129002	131432	129885	128895	129945	130248	130097	133662	132170	131734	132725	129866	136772	132574	129022	128182
GDP per capita, PPP (constant 2021 international $)	NY.GDP.PCAP.PP.KD	Macao SAR, China	MAC	87090.7	93725	102762	102356	104765	130596	155185	164065	174339	162582	123396	120755	133500	139788	133549	59791.5	74177.8	60089.8	104962	112844
GDP per capita, PPP (constant 2021 international $)	NY.GDP.PCAP.PP.KD	Madagascar	MDG	1648.18	1686.86	1731.62	1794.4	1673.16	1635.25	1614.55	1617.79	1610.6	1620.36	1627.58	1648.91	1669.73	1678.79	1707.83	1545.73	1577.43	1602.71	1629.46	1657.05
GDP per capita, PPP (constant 2021 international $)	NY.GDP.PCAP.PP.KD	Malawi	MWI	1214.74	1237.27	1318.33	1378.43	1449.73	1504.38	1533.23	1518.15	1555.51	1597.56	1597.69	1593.6	1613.06	1638.92	1687.29	1656.44	1687.59	1659.96	1648.44	1635.86
GDP per capita, PPP (constant 2021 international $)	NY.GDP.PCAP.PP.KD	Malaysia	MYS	20767.6	21444.5	22305.1	22898	22106.6	23308	24115.8	25006.4	25736.4	26818.4	27699.6	28425.4	29551.5	30460	31300.5	29200.5	29822.8	32079.2	32812.3	34071.9
GDP per capita, PPP (constant 2021 international $)	NY.GDP.PCAP.PP.KD	Maldives	MDV	13942.9	16830	17440	18344.5	16230	16730	17581.8	17390.1	17986.9	18765.4	18829.4	19345.2	20036.7	21072.6	21855.5	14243	19052.6	21357.8	22287	23351.1
GDP per capita, PPP (constant 2021 international $)	NY.GDP.PCAP.PP.KD	Mali	MLI	2314.02	2388.35	2400.65	2474.91	2506.58	2594.42	2612.85	2523.18	2508.92	2615.67	2686.56	2759.11	2816.19	2862.41	2916.17	2796.41	2796.23	2808.52	2854.83	2910.82
GDP per capita, PPP (constant 2021 international $)	NY.GDP.PCAP.PP.KD	Malta	MLT	32747.5	33390.6	34950.3	36255	35480.6	37494.8	37706.7	38902.2	40884.4	43124.1	46130.3	46924.9	51581.9	53371	53345.3	50395.9	56805.3	57784.8	59296.7	60473.3
GDP per capita, PPP (constant 2021 international $)	NY.GDP.PCAP.PP.KD	Marshall Islands	MHL	4075.16	4075.58	4222.41	3903.31	4047.23	4269.36	4259.12	4244.04	4469.85	4491.99	4670.11	4896.52	5199.34	5635.31	6405.08	6417.18	6705.88	6844.33	6786.7	7212.33
GDP per capita, PPP (constant 2021 international $)	NY.GDP.PCAP.PP.KD	Mauritania	MRT	5445.83	6284.7	6002.78	5813.36	5639.79	5605.76	5653.22	5716.25	5769.73	5837.85	5969.54	5866.28	6050.62	6153.64	6162.21	5963.24	5836.57	6053.26	6258.71	6396.99
GDP per capita, PPP (constant 2021 international $)	NY.GDP.PCAP.PP.KD	Mauritius	MUS	15205.7	15871.3	16704	17540.3	18073.7	18820	19556	20183.7	20811.5	21568.9	22335.3	23182	24073.2	25024.1	25739.4	21994.7	22737.6	24788.8	26060.7	27317.2
GDP per capita, PPP (constant 2021 international $)	NY.GDP.PCAP.PP.KD	Mexico	MEX	20277.3	20965.8	21102.3	20992.6	19385.5	20058.4	20457.6	20898.9	20805.3	21069.8	21408.9	21578.3	21777.5	21997.8	21704.2	19728.5	20782.6	21392.1	21905.2	22033.3
GDP per capita, PPP (constant 2021 international $)	NY.GDP.PCAP.PP.KD	Micronesia, Fed. Sts.	FSM	3747.88	3767.94	3727.34	3669.09	3742.83	3842.24	3958.93	3878.11	3727.43	3632.24	3788.93	3794.75	3811.79	3796.95	3938.56	3850.53	3944.71	3813.34	3814.17	3823.6
GDP per capita, PPP (constant 2021 international $)	NY.GDP.PCAP.PP.KD	Moldova	MDA	8161.47	8577.03	8854.83	9563.7	9001.23	9649.95	10217.3	10158.4	11080.1	11641.1	11691.1	12377.4	13118.8	13895.5	14621.2	13559.3	15682.1	15358	15990.5	16465.9
GDP per capita, PPP (constant 2021 international $)	NY.GDP.PCAP.PP.KD	Monaco	MCO	..	..	..	..	..	..	..	..	..	..	..	..	..	..	..	..	..	..	..	..
GDP per capita, PPP (constant 2021 international $)	NY.GDP.PCAP.PP.KD	Mongolia	MNG	7499.85	8044	8750.13	9379.85	9095.98	9507.12	10960.1	12078.9	13210.1	13943.4	13974.6	13898.1	14401.5	15230.2	15790.7	14801.3	14792.3	15310.4	16222.9	16801.3
GDP per capita, PPP (constant 2021 international $)	NY.GDP.PCAP.PP.KD	Montenegro	MNE	16326.7	17703.3	18882.8	20210.8	18998.8	19482.5	20081.8	19501.1	20155.2	20476.7	21140.2	21739.2	22741.7	23879.1	24836.8	21040.5	23843.4	25430.5	27044.9	27853.6
GDP per capita, PPP (constant 2021 international $)	NY.GDP.PCAP.PP.KD	Morocco	MAR	6103.42	6488.67	6620.59	6901.95	7063.73	7210.64	7503.79	7628.64	7839.03	7951.8	8198.81	8141.94	8450.01	8611.75	8768.18	8054.56	8623.27	8666.08	8868.71	9065.91
GDP per capita, PPP (constant 2021 international $)	NY.GDP.PCAP.PP.KD	Mozambique	MOZ	970.39	1041.8	1095.13	1141.94	1178.71	1224.23	1275.53	1338.52	1385.83	1449.93	1512.6	1537.91	1532.01	1538.84	1528.89	1466.12	1457.24	1476.67	1511.64	1495.32
GDP per capita, PPP (constant 2021 international $)	NY.GDP.PCAP.PP.KD	Myanmar	MMR	2377.9	2669.33	2968.3	3254.74	3578.17	3893.79	4078.61	4341	4666.95	5006.51	5313.89	5580.99	5877.87	6201.26	6562.99	5926.83	5178.45	5350.48	5364.14	5276.29
GDP per capita, PPP (constant 2021 international $)	NY.GDP.PCAP.PP.KD	Namibia	NAM	9245.14	9773.3	10162.2	10286.5	10166.3	10614.6	10965.3	11266.6	11593.6	11982.7	12166.6	11846.8	11408.7	11214.4	10813.3	9652.25	9709.1	9953.1	10137.7	10281.3
GDP per capita, PPP (constant 2021 international $)	NY.GDP.PCAP.PP.KD	Nauru	NRU	7284.04	7902.51	6157.9	7421.09	6996.76	6966.79	7926.22	9766.46	9882.09	11264.1	11344.1	11631	10763.8	10490.9	11273.1	11441.3	12196.6	12458.7	12461.1	12604.1
GDP per capita, PPP (constant 2021 international $)	NY.GDP.PCAP.PP.KD	Nepal	NPL	2580.23	2641.35	2708.71	2852.61	2961.84	3085.31	3176.65	3316.5	3426.56	3621.73	3745.26	3743.74	4071.7	4371.39	4607.52	4412.54	4546.23	4763.39	4861.23	5046.82
GDP per capita, PPP (constant 2021 international $)	NY.GDP.PCAP.PP.KD	Netherlands	NLD	58422	60391.5	62601.6	63678.4	61029.7	61518.6	62318.1	61480.8	61281.3	62045.9	63081.4	64267.7	65666	66758.3	67847.9	64862.2	68573.6	71324	70674	70901.8
GDP per capita, PPP (constant 2021 international $)	NY.GDP.PCAP.PP.KD	New Caledonia	NCL	..	..	..	..	..	..	..	..	..	..	..	..	..	..	..	..	..	..	..	..
GDP per capita, PPP (constant 2021 international $)	NY.GDP.PCAP.PP.KD	New Zealand	NZL	40848.3	41475.1	42346.1	41561.2	41132.3	41270.9	41814.9	42570.3	43338.4	44255.5	44963.8	45626.7	46193.3	46947.9	47277.7	46104.6	47996.7	49618.5	49083.5	48162.9
GDP per capita, PPP (constant 2021 international $)	NY.GDP.PCAP.PP.KD	Nicaragua	NIC	5356.96	5500.41	5697.21	5809.1	5538.37	5701.13	5976.25	6275.79	6494.15	6712.22	6939.03	7158.76	7391.2	7049.03	6756.59	6523.37	7119.17	7277.82	7496.53	7661.6
GDP per capita, PPP (constant 2021 international $)	NY.GDP.PCAP.PP.KD	Niger	NER	1233.88	1260.12	1252.75	1300.55	1277.69	1336.56	1318.1	1403.19	1423.26	1462.82	1471.66	1500.01	1520	1574.34	1612.64	1615.69	1585.6	1717.52	1689.56	1772.72
GDP per capita, PPP (constant 2021 international $)	NY.GDP.PCAP.PP.KD	Nigeria	NGA	4372.98	4511.64	4677.54	4856.81	5102.92	5359.52	5488	5563.64	5775.87	5980.19	5985.09	5744.56	5651.73	5628.74	5628.18	5410.69	5491.7	5552.84	5593.06	5665.45
GDP per capita, PPP (constant 2021 international $)	NY.GDP.PCAP.PP.KD	North Macedonia	MKD	13354.5	14118.3	15118.3	16038.1	16084.3	16731.1	17201.3	17190	17758.3	18452.3	19215.1	19825.8	20121.1	20806	21766.9	20971.5	22144.2	22822.3	23344.9	24465.4
GDP per capita, PPP (constant 2021 international $)	NY.GDP.PCAP.PP.KD	Northern Mariana Islands	MNP	..	..	..	..	..	..	..	..	..	..	..	..	..	..	..	..	..	..	..	..
GDP per capita, PPP (constant 2021 international $)	NY.GDP.PCAP.PP.KD	Norway	NOR	84080	85458.5	87043.5	86379.7	83642.1	83256.8	83092.4	84237.1	84070.5	84830.3	85550.3	85787.6	87194.1	87338.5	87725.7	86096.1	88984.1	91051.1	90085.6	91108.2
GDP per capita, PPP (constant 2021 international $)	NY.GDP.PCAP.PP.KD	Oman	OMN	41551.1	42540.4	43697	46586.4	48304.1	48191.6	44440.3	41964.1	40854.5	39640	39813.8	39861	38691.1	38673.6	38292.4	37560.6	38719.5	39780.2	37709.1	36654.2
GDP per capita, PPP (constant 2021 international $)	NY.GDP.PCAP.PP.KD	Pakistan	PAK	4042.15	4185.87	4257.93	4233.35	4270.44	4228.78	4246.07	4292.02	4407.15	4520.23	4645.29	4886.61	5031.56	5255.06	5295.95	5135.01	5367.27	5526.28	5439.18	5531
GDP per capita, PPP (constant 2021 international $)	NY.GDP.PCAP.PP.KD	Palau	PLW	17382.3	17561	18138.5	17406.2	16401.2	16530.8	17682.6	18219.7	17783.6	18561.4	20021.3	19903	19237.9	19256.9	19312.8	18160.3	15663.2	15477.6	15796.5	..
GDP per capita, PPP (constant 2021 international $)	NY.GDP.PCAP.PP.KD	Panama	PAN	16868	18190.3	20208.8	21867.8	21823	22739.1	24999.5	26926.9	28135.3	28931.8	29933.2	30765.2	31979.8	32681.4	33163.7	26881.8	30932.8	33833	35863.9	36426
GDP per capita, PPP (constant 2021 international $)	NY.GDP.PCAP.PP.KD	Papua New Guinea	PNG	3136.59	3202.49	3345.85	3233.92	3349.64	3579.17	3514.83	3577.45	3615.28	3998.62	4154.52	4275.75	4322.22	4211.15	4301.61	4077.63	3976.9	4125.49	4205.85	4300.73
GDP per capita, PPP (constant 2021 international $)	NY.GDP.PCAP.PP.KD	Paraguay	PRY	10290.1	10673	11141.9	11751.1	11601.3	12738.6	13109.5	12834.8	13700.7	14219.4	14427.6	14826.7	15320.3	15593	15321.3	14991.7	15406.2	15259.1	15826.1	16296.3
GDP per capita, PPP (constant 2021 international $)	NY.GDP.PCAP.PP.KD	Peru	PER	8949.95	9547.91	10286.4	11151.5	11204.4	12059	12726.6	13395.4	14052.1	14244.6	14542.8	14917.4	15069.5	15386.3	15463.5	13609.6	15280.6	15559.8	15327.6	15661.7
GDP per capita, PPP (constant 2021 international $)	NY.GDP.PCAP.PP.KD	Philippines	PHL	5386.82	5578.57	5840.07	5987.04	5965.31	6273.04	6388.31	6697.56	7016.54	7340.36	7691.76	8131.83	8584.14	9016.29	9452.29	8455.18	8857.79	9457.1	9898.53	10375.9
GDP per capita, PPP (constant 2021 international $)	NY.GDP.PCAP.PP.KD	Poland	POL	21568.9	22921.2	24484.1	25553.9	26204.4	27112.1	28521.7	28952.9	29168.6	30334.9	31700.4	32675.3	34354.6	36500.4	38181.6	37852.8	41059.6	43405	43672.8	45112.6
GDP per capita, PPP (constant 2021 international $)	NY.GDP.PCAP.PP.KD	Portugal	PRT	35870.3	36387.5	37226.5	37291.5	36092.8	36703.1	36127.3	34804.6	34651.8	35097.4	35803.4	36636.3	37943.1	39123.6	40188.3	36852.2	38657.7	41070.9	41571	41883.9
GDP per capita, PPP (constant 2021 international $)	NY.GDP.PCAP.PP.KD	Puerto Rico (US)	PRI	42555.7	42134	41888.6	41358.1	40772.4	40777.7	40972.5	41347.5	41556.8	41593.7	41737.6	41858.3	41480	41119.3	41656.3	40171.4	40559.5	42311	42738.6	44124.5
GDP per capita, PPP (constant 2021 international $)	NY.GDP.PCAP.PP.KD	Qatar	QAT	107785	115384	109580	109206	108436	129045	145591	143831	136454	128014	123071	120054	115065	114910	113161	103062	116833	114740	116159	110946
GDP per capita, PPP (constant 2021 international $)	NY.GDP.PCAP.PP.KD	Romania	ROU	20569.9	22353.4	24327.2	27038.3	25760.3	24901.7	26149.4	26766.1	26940.6	28154.7	29180.4	30187.6	32851	35067.2	36635.5	35484.2	37732.5	39380.2	40303.8	40610.8
GDP per capita, PPP (constant 2021 international $)	NY.GDP.PCAP.PP.KD	Russian Federation	RUS	27656.7	30022.7	32630.4	34342.2	31654	33063.6	34444.6	35740.7	36260.1	35853.2	35037.2	35005.4	35570.4	36536.7	37319.3	36376.3	38638.4	38214.5	39887.3	41704.7
GDP per capita, PPP (constant 2021 international $)	NY.GDP.PCAP.PP.KD	Rwanda	RWA	1360.3	1446.71	1516.27	1641.78	1699.94	1779.16	1874.21	1988.01	2032.4	2106.21	2238.54	2316.64	2351.6	2493.44	2667.46	2520.32	2733.44	2892.46	3063	3264.64
GDP per capita, PPP (constant 2021 international $)	NY.GDP.PCAP.PP.KD	Samoa	WSM	5914.89	6017.48	6013.28	6182.76	6104.13	6427.31	6616.77	6311.96	6262.32	6247.9	6432.36	6887.31	6919.02	6805.05	7033.52	6745.31	6214.02	5843.77	6340.61	6894.89
GDP per capita, PPP (constant 2021 international $)	NY.GDP.PCAP.PP.KD	San Marino	SMR	81632.2	83781.5	86785	85120.3	73093.8	68669.3	64214.1	58176.4	58468	58743.6	59647.7	60669.8	59524.6	59194	60171	55998.1	64745.1	70887.6	..	..
GDP per capita, PPP (constant 2021 international $)	NY.GDP.PCAP.PP.KD	Sao Tome and Principe	STP	4371.5	4644.18	4698.08	4873.18	4919.2	4882.05	4876.47	4919.55	5072.11	5223.1	5210.2	5388.51	5521.2	5674.72	5702.08	5742.95	5732.69	5632.14	5541.3	5480.44
GDP per capita, PPP (constant 2021 international $)	NY.GDP.PCAP.PP.KD	Saudi Arabia	SAU	54931.8	54373.7	53318.4	54407.7	51760.8	54911.5	58645.5	59471.7	57998.5	58872.3	58498.5	57308.5	57942.5	61359.5	62647.7	57420.7	62690.5	67178.6	64481.8	62676.7
GDP per capita, PPP (constant 2021 international $)	NY.GDP.PCAP.PP.KD	Senegal	SEN	3301.82	3301.03	3316.42	3359.71	3371.46	3403.57	3362.88	3405.11	3385.43	3484.01	3593.79	3710.06	3871.45	3998.29	4070.61	4018.04	4173.68	4228.73	4304.76	4495.89
GDP per capita, PPP (constant 2021 international $)	NY.GDP.PCAP.PP.KD	Serbia	SRB	15077.6	15727.4	17028.1	17983.3	17488.2	17841.5	17986.6	17993.8	18163.2	17922.5	18247.8	18889.4	19439	20454.3	21541.2	21479.1	23406.3	24634.5	25741.7	26886
GDP per capita, PPP (constant 2021 international $)	NY.GDP.PCAP.PP.KD	Seychelles	SYC	19917.1	21341.9	23117.9	21990.4	21361.1	21708.8	24406.4	24920	24770.7	25379.4	27032.2	29905.1	31595.7	32841.4	34346.1	30056.2	29979.8	27978.2	28635.4	29241.8
GDP per capita, PPP (constant 2021 international $)	NY.GDP.PCAP.PP.KD	Sierra Leone	SLE	2298.72	2344.86	2379.94	2406.82	2378.72	2461.98	2592.86	2795.44	3127.54	2815.06	2630.53	2734.72	2755.9	2769.87	2855.23	2755.1	2851.95	2937.37	3037.68	3092.83
GDP per capita, PPP (constant 2021 international $)	NY.GDP.PCAP.PP.KD	Singapore	SGP	81841.2	86463.8	90417.8	87329.6	84843.5	95456.2	99296.8	101188	104359	107067	108954	111580	116472	119928	120114	115893	132617	133572	129555	132570
GDP per capita, PPP (constant 2021 international $)	NY.GDP.PCAP.PP.KD	Sint Maarten (Dutch part)	SXM	..	..	..	..	50980.9	52140.6	53786.2	53357	52801.4	52439.5	51375.6	50817.7	46088.4	42154.1	45996.8	39265.8	40507.1	43877.2	44894.7	45821.8
GDP per capita, PPP (constant 2021 international $)	NY.GDP.PCAP.PP.KD	Slovak Republic	SVK	23257.1	25331.8	28064.2	29544	27880.4	29745.9	30468.8	30894.3	31078.1	31888.7	33507.7	34116.4	35042.7	36415.7	37194.1	36201.4	38346.1	38623.7	39497.5	40346.6
GDP per capita, PPP (constant 2021 international $)	NY.GDP.PCAP.PP.KD	Slovenia	SVN	35567.3	37548.9	40005.2	41289	37811.6	38065.7	38235.7	37043.1	36688.1	37664.7	38537.1	39677.4	41703.3	43372	44580.8	42474.2	45914.1	47064.2	47868.4	48495.9
GDP per capita, PPP (constant 2021 international $)	NY.GDP.PCAP.PP.KD	Solomon Islands	SLB	2287.26	2340.66	2384.33	2489.79	2514.89	2682.29	2777.47	2743.45	2783.59	2716.42	2664.73	2715.23	2703.66	2686.12	2661.6	2515.13	2518.42	2517.93	2523.62	2527.07
GDP per capita, PPP (constant 2021 international $)	NY.GDP.PCAP.PP.KD	Somalia, Fed. Rep.	SOM	830.509	857.686	887.051	918.802	955.877	994.868	1053.98	1114.4	1197.29	1258.82	1343.44	1383.66	1527.11	1504.44	1491.11	1396.05	1392.46	1387.81	1402.47	1408.28
GDP per capita, PPP (constant 2021 international $)	NY.GDP.PCAP.PP.KD	South Africa	ZAF	12877.3	13460.7	14033.4	14315.2	13927.7	14182.3	14451.9	14581.6	14699.1	14661.3	14559.5	14519	14591.4	14571.4	14370.2	13266.8	13711.3	13777.2	13690.4	13598.8
GDP per capita, PPP (constant 2021 international $)	NY.GDP.PCAP.PP.KD	South Sudan	SSD	..	..	..	..	..	..	..	..	..	..	..	..	..	..	..	..	..	..	..	..
GDP per capita, PPP (constant 2021 international $)	NY.GDP.PCAP.PP.KD	Spain	ESP	43570.8	44572.7	45301.3	44926.3	42852.2	42695.5	42271.8	41034	40594.9	41339.4	43053.8	44274.7	45446.3	46325.2	46896.4	41553.4	44251.7	46649.6	47341.2	48373
GDP per capita, PPP (constant 2021 international $)	NY.GDP.PCAP.PP.KD	Sri Lanka	LKA	7452.74	7970.66	8454.21	8897.83	9156.32	9832.19	10618.5	11447.7	12249.7	12910	13329.8	13845.6	14572.5	14759.8	14637.4	13886.7	14316.1	13249.1	13024.9	13752.8
GDP per capita, PPP (constant 2021 international $)	NY.GDP.PCAP.PP.KD	St. Kitts and Nevis	KNA	22612.7	23259	23330	25898.8	24973.8	24997.6	25380	25114.1	26532.1	28530.3	28729.6	29867	29948.9	30576.2	31512.2	26736.9	26896.6	29712.7	30966.3	31270.7
GDP per capita, PPP (constant 2021 international $)	NY.GDP.PCAP.PP.KD	St. Lucia	LCA	19491.2	20551.1	20759.3	21651.2	20907.3	20849.1	21637.9	21515.9	21029.3	21214.5	21143	21775.5	22422.6	22981.9	22738.2	17142	19101.2	22962.3	23403.7	24252.5
GDP per capita, PPP (constant 2021 international $)	NY.GDP.PCAP.PP.KD	St. Martin (French part)	MAF	..	..	..	..	..	..	..	..	..	..	..	..	..	..	..	..	..	..	..	..
GDP per capita, PPP (constant 2021 international $)	NY.GDP.PCAP.PP.KD	St. Vincent and the Grenadines	VCT	12320.1	13233.4	13732.4	13850.4	13723.8	13175.7	13168.9	13398	13804.2	14054.8	14523.6	15212.6	15533.2	16139.1	16365.3	15763.7	16200.9	16835	17858.2	18714.2
GDP per capita, PPP (constant 2021 international $)	NY.GDP.PCAP.PP.KD	Sudan	SDN	4152.32	4299.97	4415.79	4446.41	4188.05	4219.84	4467.63	4145.93	4130.49	4207.5	4159.19	4174.56	4061.02	3816.66	3625.52	3401.25	3248.98	3132.08	2181.08	1871.59
GDP per capita, PPP (constant 2021 international $)	NY.GDP.PCAP.PP.KD	Suriname	SUR	19220.3	20113.7	20902.1	21515.8	21906.4	22772.5	23829.5	24193.8	24624	24414.4	23327.5	21950.4	22070.5	22938.5	22966.7	19091.4	18458.2	18742.6	19043.7	19413.3
GDP per capita, PPP (constant 2021 international $)	NY.GDP.PCAP.PP.KD	Sweden	SWE	53205.9	55381.4	56745	55784.9	52957.9	55527.9	56853.8	56200.9	56360.7	57085.4	58976	59608.1	59883.7	60318.5	61232.5	59572.5	62731.7	63215.4	62845.5	63258.9
GDP per capita, PPP (constant 2021 international $)	NY.GDP.PCAP.PP.KD	Switzerland	CHE	69692.6	72077.9	74234.3	75355.2	72709.8	74290.3	74800.9	74883.6	75354.2	76189.6	76566.1	77301.2	77626.9	79261.4	79596.7	77324.9	81001.4	82777.3	82302	82026.4
GDP per capita, PPP (constant 2021 international $)	NY.GDP.PCAP.PP.KD	Syrian Arab Republic	SYR	8828.95	8885.81	8829.31	8903.77	9284.1	9546.56	9648.82	7144.37	5530.97	5301.63	5302.07	5022.11	4977.79	4956.09	4825.41	4633.35	4592.84	4454.85	4189.84	..
GDP per capita, PPP (constant 2021 international $)	NY.GDP.PCAP.PP.KD	Tajikistan	TJK	1965.3	2063.29	2181.9	2308.09	2349.5	2449.27	2572.48	2700.1	2828.39	2943.09	3041.44	3169.97	3312.71	3479.69	3649.88	3724.75	3985.91	4213.76	4472.32	4755.93
GDP per capita, PPP (constant 2021 international $)	NY.GDP.PCAP.PP.KD	Tanzania	TZA	2253.09	2334.1	2423.62	2493.26	2560.81	2654.8	2779.71	2822.49	2924.86	3027.57	3111.44	3214.25	3319.38	3392.69	3484.63	3449.82	3493.08	3546.98	3620.79	3713.26
GDP per capita, PPP (constant 2021 international $)	NY.GDP.PCAP.PP.KD	Thailand	THA	14458.3	15051.1	15742.7	15891.8	15665.9	16730.4	16766.3	17869.6	18242.4	18324.6	18812	19370.6	20094.7	20879.9	21277.8	19957.3	20242.8	20762.8	21191.5	21737.2
GDP per capita, PPP (constant 2021 international $)	NY.GDP.PCAP.PP.KD	Timor-Leste	TLS	3265.5	3040.41	3258.13	3532.57	3794.17	4049.19	4191.8	4299.97	4342.35	4447.48	4469.94	4517.58	4292.08	4210.49	5096.45	6598.03	6824.79	5347.01	4330.46	4186.21
GDP per capita, PPP (constant 2021 international $)	NY.GDP.PCAP.PP.KD	Togo	TGO	1944.78	1941.17	1863.28	1883.55	1930.78	1988.95	2048.82	2121.43	2188.07	2253.49	2317.55	2355.27	2389.21	2442.65	2501.03	2490.05	2577.2	2662.26	2767.52	2849.6
GDP per capita, PPP (constant 2021 international $)	NY.GDP.PCAP.PP.KD	Tonga	TON	5828.37	5670.91	5506.65	5758.57	5453.88	5488.75	5847.44	5907.27	5951.69	6096.87	6194.64	6639.14	6862.67	6896.04	6875.03	6995.32	7034.92	6901.74	7075.56	..
GDP per capita, PPP (constant 2021 international $)	NY.GDP.PCAP.PP.KD	Trinidad and Tobago	TTO	29574.3	33391.5	34838.3	35871.3	34256.2	35190.2	34814.4	36950.8	38033.9	39299.1	38951.9	35955.5	34153.9	33753.6	33793.7	30723.4	30424.7	30793.4	31193.9	31689.7
GDP per capita, PPP (constant 2021 international $)	NY.GDP.PCAP.PP.KD	Tunisia	TUN	10529.1	10983.9	11613.9	11990.2	12229.8	12458.3	12068.7	12436.4	12588	12824	12802.8	12803.9	12953.5	13163.6	13249.2	11955.6	12444.3	12702.5	12623	12713.5
GDP per capita, PPP (constant 2021 international $)	NY.GDP.PCAP.PP.KD	Turkiye	TUR	17659.9	18693.9	19605.2	19516.4	18320.4	19564.8	21439.1	22181.1	23756.3	24595.7	25746.4	26246.5	27852	28305.5	28132.1	28378.6	31338.3	32748.3	34282.5	35294.4
GDP per capita, PPP (constant 2021 international $)	NY.GDP.PCAP.PP.KD	Turkmenistan	TKM	5945.95	6476.83	7060.15	7945	8264.87	8842.33	9929.69	10794.2	11633.3	12544.4	13057.8	13552.8	14107.7	14648.1	15231.3	15791.2	16434.1	17119.6	17866.4	17953.8
GDP per capita, PPP (constant 2021 international $)	NY.GDP.PCAP.PP.KD	Turks and Caicos Islands	TCA	..	..	21878.8	22689.3	17512.2	17000.2	17147.4	16024.7	15461.9	16138.8	17201.8	17625.7	16498.7	30286.1	30611.2	19702.5	25056.5	28209.6	31839.4	33390.5
GDP per capita, PPP (constant 2021 international $)	NY.GDP.PCAP.PP.KD	Tuvalu	TUV	3488.54	3532.4	3737.88	3933.37	3638.19	3506.06	3687.44	3558.15	3690.24	3695.95	4088.77	4333.25	4464.26	4575.87	5292.03	5154.46	5352.98	5498.18	5812.4	..
GDP per capita, PPP (constant 2021 international $)	NY.GDP.PCAP.PP.KD	Uganda	UGA	1765.04	1898.98	1999.06	2110.1	2188.3	2244.61	2384.47	2405.09	2420.89	2470.5	2520.02	2554.23	2543.85	2613.88	2689.41	2678.01	2684.92	2724.91	2791.06	2881.87
GDP per capita, PPP (constant 2021 international $)	NY.GDP.PCAP.PP.KD	Ukraine	UKR	15610.6	16901.5	18374	18884	16092.8	16811.8	17784	17848.7	17889.1	16978.8	15403.7	15856.8	16310.4	16979	17636.6	17092.5	17846.4	13787.1	15917	16319.8
GDP per capita, PPP (constant 2021 international $)	NY.GDP.PCAP.PP.KD	United Arab Emirates	ARE	89986.1	92044.5	84581.9	77892	69358	68799.9	70662.5	69158.8	69807	69409	70234.7	70574	68871.8	68855	68887.8	65784.7	67401.1	68867.8	68577.5	68584.7
GDP per capita, PPP (constant 2021 international $)	NY.GDP.PCAP.PP.KD	United Kingdom	GBR	47804.8	48584.4	49473	48963	46348.8	47013.9	47178.9	47550.9	48083.8	49250.6	49983.3	50540.9	51601.1	52071.3	52645.5	47144.7	51004.4	52982.2	52502.9	52518
GDP per capita, PPP (constant 2021 international $)	NY.GDP.PCAP.PP.KD	United States	USA	59604.8	60676.6	61306.6	60798.4	58715	59789.4	60245.5	61134.5	61958.7	63018.8	64359.5	65017.7	66155.6	67719.8	69112.6	67342.1	71307.4	72679.3	74158.7	75491.6
GDP per capita, PPP (constant 2021 international $)	NY.GDP.PCAP.PP.KD	Uruguay	URY	18811.3	19560.1	20803.9	22249.4	23138.1	24879.8	26099.3	26953.3	28119.5	28935.1	28941.6	29332.6	29762.4	29757.9	30010.6	27788.2	29431.9	30804.7	31059.3	32038.8
GDP per capita, PPP (constant 2021 international $)	NY.GDP.PCAP.PP.KD	Uzbekistan	UZB	4160.96	4413.72	4764.56	5115.64	5439.55	5760.81	6100.25	6435.56	6797.77	7145.11	7529.76	7839.98	8047.05	8348.96	8755.13	8727.41	9247.64	9607.56	10007.7	10450.2
GDP per capita, PPP (constant 2021 international $)	NY.GDP.PCAP.PP.KD	Vanuatu	VUT	3089.44	3270.7	3283.37	3381.39	3396.74	3359.85	3390.96	3350.77	3292.23	3302.29	3357.64	3397.77	3465.92	3482.02	3512.07	3260	3135.84	3222.84	3118.4	3169.23
GDP per capita, PPP (constant 2021 international $)	NY.GDP.PCAP.PP.KD	Venezuela, RB	VEN	..	..	..	..	..	..	..	..	..	..	..	..	..	..	..	..	..	..	..	..
GDP per capita, PPP (constant 2021 international $)	NY.GDP.PCAP.PP.KD	Viet Nam	VNM	5776.36	6098.24	6418.54	6659.14	6914.34	7274.73	7652.62	7979.87	8324.2	8751.88	9248.02	9743.19	10290.5	10936.9	11628.6	11851.4	12048.9	12979.8	13545.9	14415.2
GDP per capita, PPP (constant 2021 international $)	NY.GDP.PCAP.PP.KD	Virgin Islands (U.S.)	VIR	57838.1	59911.7	62332.9	63057.6	58895.3	59272.2	54443.1	46422.4	43563.9	42853.9	42739.1	43502.4	43277.2	44205.4	45632.6	45055.8	46893.5	46479.3	..	..
GDP per capita, PPP (constant 2021 international $)	NY.GDP.PCAP.PP.KD	West Bank and Gaza	PSE	4885.07	4714.37	4769.52	4984.81	5270.66	5432.24	5805.32	6009.11	6142.2	5990.43	6072.65	6464.13	6426.8	6342.94	6269.89	5423.68	5663.12	5753.08	5361.13	3845.5
GDP per capita, PPP (constant 2021 international $)	NY.GDP.PCAP.PP.KD	Yemen, Rep.	YEM	..	..	..	..	..	..	..	..	..	..	..	..	..	..	..	..	..	..	..	..
GDP per capita, PPP (constant 2021 international $)	NY.GDP.PCAP.PP.KD	Zambia	ZMB	2564.48	2673.46	2796.35	2908.14	3065.84	3266.51	3335.64	3474.55	3535.22	3585.58	3576.93	3598.17	3612.51	3646.96	3591.56	3391.6	3503.03	3585.12	3673.48	3716.04
GDP per capita, PPP (constant 2021 international $)	NY.GDP.PCAP.PP.KD	Zimbabwe	ZWE	2642.17	2519.83	2395.99	1949.03	2176.86	2563.48	2875.9	3301.17	3319.77	3352.38	3366.63	3345.32	3453.51	3572.98	3294.8	2987.27	3184.78	3323.12	3442.25	3450.13
GDP per capita, PPP (constant 2021 international $)	NY.GDP.PCAP.PP.KD	Africa Eastern and Southern	AFE	3482.94	3620.75	3766.9	3836.02	3768.19	3862.65	3923.04	3930.4	3990.24	4052.02	4075.16	4074.19	4085.47	4088.4	4073.65	3861.07	3933.58	3974.24	3948.14	3968.96
GDP per capita, PPP (constant 2021 international $)	NY.GDP.PCAP.PP.KD	Africa Western and Central	AFW	3791.27	3880.96	3971.03	4099.57	4217.72	4382.42	4471.2	4579.6	4717.24	4846.99	4858.29	4755	4751.5	4775.86	4822.31	4670.07	4746.75	4825.14	4872.77	4961.66
GDP per capita, PPP (constant 2021 international $)	NY.GDP.PCAP.PP.KD	Arab World	ARB	14054.8	14539.7	14840.6	15297.5	15113.2	15528.7	15846.8	16052.7	15995.3	16048.9	16265.7	16496	16462.5	16640.7	16697.6	15717.6	16140	16877.4	16752.2	16670.7
GDP per capita, PPP (constant 2021 international $)	NY.GDP.PCAP.PP.KD	Caribbean small states	CSS	21227.8	22906.4	23735	24117.9	23295.7	23691.3	23810.5	24749.1	25091.6	25579.9	25332.3	24289.2	23869	23961.7	24041.2	22176.7	23346.6	26908.8	29498.9	33843.3
GDP per capita, PPP (constant 2021 international $)	NY.GDP.PCAP.PP.KD	Central Europe and the Baltics	CEB	23840.5	25494.4	27208.8	28472	27514.5	27961	29056.5	29389.1	29681.8	30744.8	32057.9	33067.1	34902.8	36785.1	38355.6	37325.1	40161.4	41867.6	42171.8	43045.9
GDP per capita, PPP (constant 2021 international $)	NY.GDP.PCAP.PP.KD	Early-demographic dividend	EAR	6926.84	7240.9	7551.62	7702.85	7730.64	8115.21	8407.46	8626.25	8869.65	9157.4	9490.2	9840.53	10199.5	10514.5	10684.8	10139.1	10774.1	11314	11768.4	12112
GDP per capita, PPP (constant 2021 international $)	NY.GDP.PCAP.PP.KD	East Asia & Pacific	EAS	10353.5	11014.1	11829.1	12337	12672.7	13604.5	14313	15001.4	15717.7	16412.3	17117.8	17848.7	18679.5	19526.2	20291.4	20199.1	21435	22097.7	23016.8	23953.9
GDP per capita, PPP (constant 2021 international $)	NY.GDP.PCAP.PP.KD	East Asia & Pacific (excluding high income)	EAP	6602.19	7224.91	8000.22	8584.78	9145.74	9942.24	10666.2	11359.2	12057.9	12769.3	13493.4	14243.8	15060.2	15925	16754.2	16816.9	17966.4	18599.5	19521.6	20452.2
GDP per capita, PPP (constant 2021 international $)	NY.GDP.PCAP.PP.KD	East Asia & Pacific (IDA & IBRD countries)	TEA	6679.84	7309.61	8093.67	8684.7	9251.81	10057.1	10789	11489.4	12195.4	12914.4	13646.2	14404.7	15229.7	16103.8	16942	17005.2	18167.7	18808.2	19741	20682.4
GDP per capita, PPP (constant 2021 international $)	NY.GDP.PCAP.PP.KD	Euro area	EMU	48221.2	49603.6	50844.4	50804.4	48333.6	49189.3	50097	49485.1	49298.9	49915.9	50832.1	51624.9	52857.4	53638.6	54413.4	50965	54187.8	55902.3	55940.1	56326.3
GDP per capita, PPP (constant 2021 international $)	NY.GDP.PCAP.PP.KD	Europe & Central Asia	ECS	34031.5	35511.3	36980.4	37451.2	35503.8	36392.8	37343.3	37464	37729.8	38210.6	38660.1	39175	40198.6	41007.5	41700.1	39619.6	42235	43268.8	43956.6	44689.6
GDP per capita, PPP (constant 2021 international $)	NY.GDP.PCAP.PP.KD	Europe & Central Asia (excluding high income)	ECA	13542.1	14608.6	15690.8	16106.6	15202.9	16053.7	17121.3	17548.9	18329.7	18450.2	18602.3	18897.8	19703.8	20222.5	20554.9	20316.8	21838	21980.6	23256.4	24005.3
GDP per capita, PPP (constant 2021 international $)	NY.GDP.PCAP.PP.KD	Europe & Central Asia (IDA & IBRD countries)	TEC	19414.7	20949.3	22607.3	23600.6	22200.8	23111	24273.1	24953.9	25539.3	25789.3	25769.1	26044.6	26911.9	27767.1	28397.9	27817.2	29735.8	29986.9	31312.7	32416.2
GDP per capita, PPP (constant 2021 international $)	NY.GDP.PCAP.PP.KD	European Union	EUU	43484.3	44953.6	46281.9	46530.3	44438.9	45261	46216.7	45800.7	45735.6	46465.3	47500.3	48356.8	49714.8	50726.8	51683.6	48792.3	51978.6	53686.7	53779.6	54291.1
GDP per capita, PPP (constant 2021 international $)	NY.GDP.PCAP.PP.KD	Fragile and conflict affected situations	FCS	4939.52	5129.97	5337.75	5464.25	5340.69	5557.74	5577.7	5649.58	5664.17	5592.54	5518.87	5563.85	5580.58	5624.87	5664.29	5288.81	5261.53	5066.99	5068.16	5053.44
GDP per capita, PPP (constant 2021 international $)	NY.GDP.PCAP.PP.KD	Heavily indebted poor countries (HIPC)	HPC	2286.12	2353.11	2415.45	2482.94	2506.04	2593.15	2635.29	2664.47	2737.19	2809.51	2860.05	2905.26	2962.7	3000.17	3047.77	2969.08	2997.16	3054.56	3072.08	3144.72
GDP per capita, PPP (constant 2021 international $)	NY.GDP.PCAP.PP.KD	High income	HIC	45478.5	46856.1	48080.3	48267.6	46254.6	47506.6	48413.3	48866.9	49345	50113.1	50871.8	51469.2	52524.3	53620.7	54478.8	52199	55348.6	56725.6	57349.4	58151.3
GDP per capita, PPP (constant 2021 international $)	NY.GDP.PCAP.PP.KD	IBRD only	IBD	8850.16	9454.57	10151.3	10597.1	10696.7	11363.9	11913.1	12383.7	12846.3	13283.9	13687	14165.5	14738.8	15317.1	15779.5	15370.7	16411.9	16953.1	17711.9	18388.6
GDP per capita, PPP (constant 2021 international $)	NY.GDP.PCAP.PP.KD	IDA & IBRD total	IBT	7528.99	8005.87	8549.43	8893.07	8973.3	9491.08	9909.68	10257.3	10613.1	10954.9	11260.5	11614.4	12040.7	12469.3	12803.3	12435.9	13184.9	13566.2	14085.4	14558.5
GDP per capita, PPP (constant 2021 international $)	NY.GDP.PCAP.PP.KD	IDA blend	IDB	4180.24	4311.98	4421.24	4474.96	4603.2	4733.34	4804.67	4904.87	5065.95	5237.73	5334.9	5376.75	5428.86	5543.08	5601.07	5418.45	5601.42	5734.61	5770.13	5881.31
GDP per capita, PPP (constant 2021 international $)	NY.GDP.PCAP.PP.KD	IDA only	IDX	2659.13	2772.97	2894.85	3005.03	3074.87	3200.58	3307.55	3324.29	3389.79	3495.16	3593.44	3693.82	3819.06	3927.59	4039.76	3940.66	3984.77	4071.1	4115.71	4209.87
GDP per capita, PPP (constant 2021 international $)	NY.GDP.PCAP.PP.KD	IDA total	IDA	3184.18	3304.1	3421.61	3512	3603.69	3731.37	3825.48	3872.55	3972.51	4101.07	4197.8	4275.25	4372.11	4480.8	4571.34	4441.76	4534.28	4635.77	4675.44	4773.16
GDP per capita, PPP (constant 2021 international $)	NY.GDP.PCAP.PP.KD	Late-demographic dividend	LTE	10457.8	11323.8	12351.2	13087.4	13323.7	14245.4	15105.7	15832.2	16533.6	17197	17763.9	18355.4	19144.9	20030.2	20835.6	20724.1	22182.3	22835	23782.8	24812.2
GDP per capita, PPP (constant 2021 international $)	NY.GDP.PCAP.PP.KD	Latin America & Caribbean	LCN	15537.8	16143.6	16791	17212	16633.9	17519.3	18117.8	18400	18731.2	18815	18723.6	18509.9	18701.1	18851.9	18841	17478.4	18654.8	19295.5	19602.6	19905.3
GDP per capita, PPP (constant 2021 international $)	NY.GDP.PCAP.PP.KD	Latin America & Caribbean (excluding high income)	LAC	15055.9	15646	16280.3	16692.5	16107.7	16998.7	17574.8	17806.3	18123.9	18192.9	18077.3	17834.8	18016	18120.2	18068.1	16754.7	17833.3	18419.7	18695.1	18935.3
GDP per capita, PPP (constant 2021 international $)	NY.GDP.PCAP.PP.KD	Latin America & the Caribbean (IDA & IBRD countries)	TLA	15392.1	16009.1	16666.6	17097.5	16519.1	17416.2	18021.8	18305.9	18640.3	18724.6	18631.2	18414.6	18610.1	18765.7	18748.8	17388.5	18567	19199.2	19503.3	19797.6
GDP per capita, PPP (constant 2021 international $)	NY.GDP.PCAP.PP.KD	Least developed countries: UN classification	LDC	2396.27	2510.77	2642.88	2756.87	2815.89	2925.02	3001.69	3075.43	3176.93	3289.54	3381.83	3464.22	3562.1	3657.84	3768.65	3682.59	3695.38	3793.48	3831.95	3895.84
GDP per capita, PPP (constant 2021 international $)	NY.GDP.PCAP.PP.KD	Low & middle income	LMY	6748.89	7173.99	7662.06	7968.07	8142.15	8653.82	9049.67	9382.86	9748.98	10100.4	10436	10806.1	11227.1	11638.8	11962.1	11632	12336.1	12731.2	13240.3	13689.9
GDP per capita, PPP (constant 2021 international $)	NY.GDP.PCAP.PP.KD	Low income	LIC	2360.41	2426.05	2502.89	2560.91	2586.36	2674.63	2675.52	2461.78	2374.01	2383.33	2394.12	2389.64	2390.09	2395.3	2406.66	2322.37	2275.68	2291.65	2221.14	2228.08
GDP per capita, PPP (constant 2021 international $)	NY.GDP.PCAP.PP.KD	Lower middle income	LMC	4319.51	4547.36	4779.76	4906.9	5117.12	5378.89	5541.99	5733.79	5963.27	6234.24	6523.3	6822.77	7109.19	7409.39	7616.26	7248.35	7652.72	8042.73	8449.21	8788.58
GDP per capita, PPP (constant 2021 international $)	NY.GDP.PCAP.PP.KD	Middle East, North Africa, Afghanistan & Pakistan	MEA	11304.4	11669.4	11994.8	12232.5	12152.4	12469.3	12698.1	12805	12790.2	12938.3	13085.6	13460.6	13549.9	13707.4	13715.8	13116.1	13527.2	14106.7	14141.1	14174.5
GDP per capita, PPP (constant 2021 international $)	NY.GDP.PCAP.PP.KD	Middle East, North Africa, Afghanistan & Pakistan (excluding high income)	MNA	7926.79	8178.15	8473.91	8601.16	8680.61	8895.64	8831.08	8837.34	8765.58	8846.07	8897.34	9262.59	9401.35	9498.66	9501.27	9162.45	9377.97	9636.68	9736.84	9792.56
GDP per capita, PPP (constant 2021 international $)	NY.GDP.PCAP.PP.KD	Middle East, North Africa, Afghanistan & Pakistan (IDA & IBRD)	TMN	7947.22	8201.44	8498.88	8625.69	8703.87	8919.36	8851.93	8856.95	8783.87	8866.04	8917.21	9282.41	9422.46	9521.19	9524.49	9189.43	9404.98	9665.11	9769.02	9836.85
GDP per capita, PPP (constant 2021 international $)	NY.GDP.PCAP.PP.KD	Middle income	MIC	7104.48	7564.04	8091.76	8425.18	8619.06	9174.09	9610.89	9995.2	10406.4	10795.4	11168.6	11582.7	12054.1	12517.7	12887.1	12550.5	13344.2	13796.6	14384.5	14902
GDP per capita, PPP (constant 2021 international $)	NY.GDP.PCAP.PP.KD	North America	NAC	58901.4	59950.8	60574.9	60110.5	58016.9	59082	59602.1	60435.1	61242.5	62295.5	63496.2	64080	65200.7	66672	67938.4	65982.8	69833.5	71185	72394.1	73461.8
GDP per capita, PPP (constant 2021 international $)	NY.GDP.PCAP.PP.KD	Not classified	INX	..	..	..	..	..	..	..	..	..	..	..	..	..	..	..	..	..	..	..	..
GDP per capita, PPP (constant 2021 international $)	NY.GDP.PCAP.PP.KD	OECD members	OED	43136.6	44205.5	45088.7	44943.6	43067.5	44074.8	44754.2	45057.5	45511.5	46235.9	47132.8	47716.3	48699.7	49543	50160.2	47938	50780.3	52125.4	52704.7	53311.4
GDP per capita, PPP (constant 2021 international $)	NY.GDP.PCAP.PP.KD	Other small states	OSS	18925.3	19883.2	20624.2	20542.9	19412.9	19778.8	20322.8	20417.9	20408.7	20612.4	21045.7	21597	22377.5	23008	23778.2	22201.5	23574.9	24161.6	24447.4	24932.7
GDP per capita, PPP (constant 2021 international $)	NY.GDP.PCAP.PP.KD	Pacific island small states	PSS	6317.61	6382.51	6301.59	6345.17	6230.13	6374.51	6510.65	6494.7	6642.87	6826.21	7018.06	7162.44	7371.41	7498.24	7469.93	6504.37	6218.59	6881.12	7192.85	7392.23
GDP per capita, PPP (constant 2021 international $)	NY.GDP.PCAP.PP.KD	Post-demographic dividend	PST	47710.7	48913.7	49937.5	49848.1	47789	48953.7	49656.6	49950.2	50446.8	51145.9	51962.5	52657.6	53759.9	54754.4	55580.5	53105.2	56153.8	57461.8	58305.8	58991
GDP per capita, PPP (constant 2021 international $)	NY.GDP.PCAP.PP.KD	Pre-demographic dividend	PRE	3370.62	3480.27	3591.7	3711.01	3768.67	3899.09	3951.96	4039.11	4142.87	4231.92	4245.14	4252.28	4209.99	4207.05	4234.84	4011.64	4022.59	4090.83	4074.74	4096.7
GDP per capita, PPP (constant 2021 international $)	NY.GDP.PCAP.PP.KD	Small states	SST	17842.1	18854.6	19505	19549.9	18623.3	18960.5	19339	19611.8	19698.2	19956.9	20189.9	20307.4	20726.2	21162.4	21667.6	20103.5	21203.4	22472	23274.7	24601
GDP per capita, PPP (constant 2021 international $)	NY.GDP.PCAP.PP.KD	South Asia	SAS	3844.01	4085.07	4330.3	4419.83	4683.42	4997.84	5199.4	5421.17	5690.33	6029.55	6420.4	6853.84	7237.9	7622.25	7857.61	7399.21	8015.36	8522.03	9169.18	9653.44
GDP per capita, PPP (constant 2021 international $)	NY.GDP.PCAP.PP.KD	South Asia (IDA & IBRD)	TSA	3844.01	4085.07	4330.3	4419.83	4683.42	4997.84	5199.4	5421.17	5690.33	6029.55	6420.4	6853.84	7237.9	7622.25	7857.61	7399.21	8015.36	8522.03	9169.18	9653.44
GDP per capita, PPP (constant 2021 international $)	NY.GDP.PCAP.PP.KD	Sub-Saharan Africa	SSF	3606.06	3724.17	3847.3	3940.8	3949.4	4072.68	4144.88	4193.9	4285.63	4375.36	4393.61	4350.63	4355.8	4367.18	4377.02	4188.7	4262.25	4317.72	4321.39	4369.75
GDP per capita, PPP (constant 2021 international $)	NY.GDP.PCAP.PP.KD	Sub-Saharan Africa (excluding high income)	SSA	3901.03	4024.74	4152.65	4247.7	4249.86	4373.83	4441.69	4486.92	4575.34	4660.92	4665.57	4603.14	4593.3	4595.94	4592.56	4374.65	4448.69	4502.86	4495.49	4535.11
GDP per capita, PPP (constant 2021 international $)	NY.GDP.PCAP.PP.KD	Sub-Saharan Africa (IDA & IBRD countries)	TSS	3606.06	3724.17	3847.3	3940.8	3949.4	4072.68	4144.88	4193.9	4285.63	4375.36	4393.61	4350.63	4355.8	4367.18	4377.02	4188.7	4262.25	4317.72	4321.39	4369.75
GDP per capita, PPP (constant 2021 international $)	NY.GDP.PCAP.PP.KD	Upper middle income	UMC	9730.93	10436.5	11278.5	11842.6	12051.1	12928.2	13671.4	14279.8	14904.7	15446.4	15937.9	16503.4	17199.8	17868.9	18448	18191.1	19452	20030.8	20882.4	21658.6
GDP per capita, PPP (constant 2021 international $)	NY.GDP.PCAP.PP.KD	World	WLD	14291.3	14845	15422.6	15655.6	15356.3	15944.8	16373.6	16673.6	17005.9	17379.9	17746.7	18110.5	18589	19063	19424.5	18698.1	19752	20281.5	20785.3	21267.7
GDP per capita growth (annual %)	NY.GDP.PCAP.KD.ZG	Afghanistan	AFG	7.38338	1.13249	11.6923	1.67728	17.0439	11.055	-3.2133	8.27937	2.05207	-0.939985	-1.66506	-0.300121	-0.19557	-1.71374	0.856295	-5.38251	-22.5845	-7.57667	0.106093	..
GDP per capita growth (annual %)	NY.GDP.PCAP.KD.ZG	Albania	ALB	5.67025	6.68998	7.30798	7.73056	3.38512	3.48565	2.73953	1.15104	1.89374	2.45213	2.52583	4.0752	3.37821	3.92753	2.4983	-2.75698	9.98433	6.10895	5.13712	5.16252
GDP per capita growth (annual %)	NY.GDP.PCAP.KD.ZG	Algeria	DZA	3.8689	1.32619	1.39347	0.652528	-0.720421	2.77922	1.00399	0.379563	0.548744	2.00005	1.09962	1.78594	-0.541667	-0.54602	-0.939993	-6.61248	2.13264	1.96825	2.5512	1.86552
GDP per capita growth (annual %)	NY.GDP.PCAP.KD.ZG	American Samoa	ASM	-0.0545953	-3.68498	2.3256	-2.16041	-3.64891	0.844682	0.606613	-3.62202	-1.62801	2.79061	4.29662	-0.488138	-5.79936	4.03851	0.897585	5.35179	0.297885	3.59328	..	..
GDP per capita growth (annual %)	NY.GDP.PCAP.KD.ZG	Andorra	AND	1.18303	1.95883	-1.28961	-7.3893	-5.74649	1.88988	3.74952	-3.80075	-1.44395	4.52989	3.6308	3.69962	-1.80606	-0.302119	0.265353	-12.2238	6.92704	7.72124	1.12326	2.00678
GDP per capita growth (annual %)	NY.GDP.PCAP.KD.ZG	Angola	AGO	10.9112	7.51431	9.82194	7.04804	-2.90229	0.454324	-0.473683	4.40759	0.990676	0.981944	-2.6307	-6.00265	-3.62076	-4.66597	-4.01002	-8.67208	-1.96959	-0.143628	-1.98829	1.29293
GDP per capita growth (annual %)	NY.GDP.PCAP.KD.ZG	Antigua and Barbuda	ATG	5.28071	11.3196	7.84345	-1.47077	-13.2818	-9.07945	-3.108	2.27378	-1.50847	1.39121	0.691095	3.47228	2.14619	6.17449	2.67761	-19.2945	7.58367	8.53077	1.90489	3.82019
GDP per capita growth (annual %)	NY.GDP.PCAP.KD.ZG	Argentina	ARG	7.73898	6.94185	7.93261	3.00857	-6.91031	8.9682	4.88127	-2.03833	1.39351	-3.51326	1.66091	-3.0245	1.9164	-3.41554	-2.69507	-10.3361	10.1486	5.0482	-1.89295	-2.0584
GDP per capita growth (annual %)	NY.GDP.PCAP.KD.ZG	Armenia	ARM	14.5697	13.8987	14.4208	7.60295	-13.5088	2.91159	5.28438	7.3347	3.37178	3.88188	3.516	0.611877	7.96545	5.5685	7.83608	-7.16866	5.77143	12.3383	8.47902	3.48422
GDP per capita growth (annual %)	NY.GDP.PCAP.KD.ZG	Aruba	ABW	-2.93082	-0.673258	2.32268	1.06177	-12.2749	-2.95695	2.61053	-2.48465	4.85528	-2.62962	-1.63575	0.951538	7.04066	2.23443	-2.49655	-25.7932	25.155	8.91231	4.21613	..
GDP per capita growth (annual %)	NY.GDP.PCAP.KD.ZG	Australia	AUS	1.90609	1.37803	1.89664	1.53115	-0.185791	0.642043	0.993947	2.11826	0.851365	1.07636	0.729964	1.16682	0.609017	1.35087	0.673067	-1.34398	1.9674	2.9241	0.964386	-0.627098
GDP per capita growth (annual %)	NY.GDP.PCAP.KD.ZG	Austria	AUT	1.62566	2.75962	3.43939	1.13621	-3.83849	1.56453	2.5811	0.170489	-0.836907	-0.0285805	0.17426	1.01888	1.56431	1.98626	1.3035	-6.70639	4.33976	4.27593	-1.93015	-1.67659
GDP per capita growth (annual %)	NY.GDP.PCAP.KD.ZG	Azerbaijan	AZE	26.6601	32.9971	24.0487	8.29339	7.12224	3.54946	-2.84718	0.853886	4.4832	1.52243	-0.147025	-4.14117	-0.824348	0.624884	1.61583	-4.85235	5.15149	4.67332	1.23268	3.57269
GDP per capita growth (annual %)	NY.GDP.PCAP.KD.ZG	Bahamas, The	BHS	2.15976	1.19796	0.0223162	-3.62902	-5.41414	0.248837	-0.537416	3.47901	-3.75633	0.956171	0.197887	-1.84629	2.72795	1.81654	-1.33099	-20.3294	17.4356	10.5525	2.55809	2.90371
GDP per capita growth (annual %)	NY.GDP.PCAP.KD.ZG	Bahrain	BHR	-1.0488	-1.47038	0.0756469	0.0637145	-3.9792	0.077167	4.78747	2.60578	1.57669	-0.560855	-1.66329	-0.0791099	-0.457057	1.9185	3.38274	-5.17307	2.1192	4.76451	0.428859	2.26433
GDP per capita growth (annual %)	NY.GDP.PCAP.KD.ZG	Bangladesh	BGD	5.20131	5.44043	5.9132	4.96057	4.07076	4.65046	5.5015	5.50548	5.02342	5.09905	5.6045	6.16182	5.6871	6.44197	6.97264	2.58648	6.07069	6.00847	4.4907	2.965
GDP per capita growth (annual %)	NY.GDP.PCAP.KD.ZG	Barbados	BRB	3.41074	5.56141	1.59529	0.107256	-5.50549	-2.6156	-1.05354	-0.600919	-1.26956	-0.163173	-1.07427	1.57058	-0.0763346	-1.36418	0.475052	-15.2024	-0.413697	17.7615	4.08718	3.75186
GDP per capita growth (annual %)	NY.GDP.PCAP.KD.ZG	Belarus	BLR	10.1498	10.6756	9.09946	10.5813	0.446706	7.98573	5.79755	1.86727	1.03749	1.59406	-3.95725	-2.61191	2.64481	3.36999	1.65137	-0.251225	3.29082	-3.88854	4.69121	4.51757
GDP per capita growth (annual %)	NY.GDP.PCAP.KD.ZG	Belgium	BEL	1.76046	1.87817	2.91838	-0.343476	-2.69253	1.77618	0.613617	-0.403775	-0.166173	1.31477	0.887876	0.682455	1.08431	1.41529	1.89072	-5.20244	5.77135	3.42017	0.281208	0.258325
GDP per capita growth (annual %)	NY.GDP.PCAP.KD.ZG	Belize	BLZ	-0.719541	1.55375	0.483372	-4.35067	-3.01904	-1.29537	-2.39419	1.53034	2.24891	1.85555	0.736858	-2.24225	-4.04836	-0.757267	2.75346	-15.0007	16.3958	7.6417	-0.911086	6.60473
GDP per capita growth (annual %)	NY.GDP.PCAP.KD.ZG	Benin	BEN	-1.51043	0.75009	2.90018	1.77647	-0.703743	-0.888245	-0.057123	1.74648	4.07667	3.26077	-1.18432	0.361166	2.67042	3.73702	3.98211	1.1202	4.41335	3.58043	3.70333	4.84018
GDP per capita growth (annual %)	NY.GDP.PCAP.KD.ZG	Bermuda	BMU	1.42128	5.33726	3.05648	-2.31554	-6.02014	-2.74767	-3.75483	-5.17586	-0.166771	-3.63286	0.878744	-0.633721	3.40119	-0.827445	-0.124746	-7.22555	4.17701	6.31014	4.99992	2.20331
GDP per capita growth (annual %)	NY.GDP.PCAP.KD.ZG	Bhutan	BTN	5.10598	4.23383	14.7631	3.35524	6.48266	10.7124	7.30477	4.00626	0.614997	4.74507	5.58371	7.42464	1.21137	2.76296	5.05479	-10.8226	3.68935	4.47662	4.15291	..
GDP per capita growth (annual %)	NY.GDP.PCAP.KD.ZG	Bolivia	BOL	2.67601	3.02574	2.791	4.37163	1.65008	2.42846	3.51065	3.45406	5.12847	3.84418	3.27865	2.72221	2.68373	2.74037	0.789012	-9.85711	5.03526	2.40644	1.67597	0.00311571
GDP per capita growth (annual %)	NY.GDP.PCAP.KD.ZG	Bosnia and Herzegovina	BIH	5.02566	6.27586	7.17191	7.20357	-1.31069	2.67372	2.83942	1.11532	4.02941	2.45998	5.68706	4.59597	4.57869	5.10525	4.1626	-1.65751	9.19172	5.53111	2.62617	3.15434
GDP per capita growth (annual %)	NY.GDP.PCAP.KD.ZG	Botswana	BWA	2.69661	6.36143	3.7619	1.19923	-15.8997	7.82115	4.75557	-1.83176	9.43871	4.17099	-6.19995	5.69319	2.64591	2.72071	1.57639	-10.0332	10.2596	3.82363	1.52894	-4.56345
GDP per capita growth (annual %)	NY.GDP.PCAP.KD.ZG	Brazil	BRA	2.07731	2.86752	5.00147	4.09222	-1.01632	6.62783	3.1317	1.09733	2.17333	-0.303164	-4.3064	-4.01013	0.587669	1.09041	0.562971	-3.83551	4.31793	2.64632	2.8337	2.97748
GDP per capita growth (annual %)	NY.GDP.PCAP.KD.ZG	British Virgin Islands	VGB	..	..	..	..	..	..	..	..	..	..	..	..	..	..	..	..	..	..	..	..
GDP per capita growth (annual %)	NY.GDP.PCAP.KD.ZG	Brunei Darussalam	BRN	-1.67695	2.45785	-5.37503	-5.66095	-3.72463	0.808738	1.9113	-0.621624	-3.46842	-3.80575	-1.68097	-3.69864	0.109332	-1.09896	2.72616	0.0657354	-2.53124	-2.41661	0.339025	3.35095
GDP per capita growth (annual %)	NY.GDP.PCAP.KD.ZG	Bulgaria	BGR	7.8655	7.61685	7.44149	6.87713	-2.72241	2.22608	2.74691	1.33407	1.48366	2.18296	4.72029	4.37288	4.11524	3.96558	5.26445	-2.24017	8.49937	4.71794	2.17922	2.8464
GDP per capita growth (annual %)	NY.GDP.PCAP.KD.ZG	Burkina Faso	BFA	5.29574	2.98889	1.00131	2.73664	-0.000227774	5.31935	3.51634	3.28878	2.66508	1.27048	0.88826	2.90351	3.21641	3.76773	3.24392	-0.44342	4.43101	-0.819553	0.649578	2.65344
GDP per capita growth (annual %)	NY.GDP.PCAP.KD.ZG	Burundi	BDI	-2.77895	1.68474	-0.304003	0.623635	-1.31555	0.316684	0.376421	0.785222	1.22233	0.761607	-6.0555	-2.29688	-1.83469	-1.41181	-1.47633	-2.54898	0.329206	-0.869931	-0.0969643	0.849391
GDP per capita growth (annual %)	NY.GDP.PCAP.KD.ZG	Cabo Verde	CPV	5.64634	6.74862	13.9029	5.93629	-2.43496	1.10868	3.5868	0.983346	0.579092	0.676815	0.922631	4.24816	4.48221	3.60152	6.8045	-20.8938	6.62541	15.1545	4.86856	6.75154
GDP per capita growth (annual %)	NY.GDP.PCAP.KD.ZG	Cambodia	KHM	11.6638	9.31792	8.78144	5.85729	2.44675	3.45435	5.66993	6.04757	6.25691	6.41109	5.65293	6.34301	6.59196	7.43177	6.58272	-4.96368	1.57862	3.74001	3.66848	4.72406
GDP per capita growth (annual %)	NY.GDP.PCAP.KD.ZG	Cameroon	CMR	-0.550411	0.995179	1.44057	-0.0546844	-0.318334	0.000136421	0.496174	1.72381	2.08715	2.56873	2.40123	1.45712	0.647005	1.11515	0.636415	-2.43476	0.631352	1.04503	0.555787	0.997232
GDP per capita growth (annual %)	NY.GDP.PCAP.KD.ZG	Canada	CAN	2.23758	1.6029	1.06414	-0.0933428	-4.02009	1.95145	2.13608	0.658842	1.25359	1.84841	-0.112369	-0.0982964	1.80946	1.28093	0.429658	-6.06241	5.36529	2.32642	-1.37792	-1.43528
GDP per capita growth (annual %)	NY.GDP.PCAP.KD.ZG	Cayman Islands	CYM	..	..	0.141682	-3.20929	-9.78775	-5.37887	-1.57276	-1.481	-1.34352	0.0864584	0.360803	0.854493	0.889646	2.04407	1.77642	-6.83263	2.77415	2.97803	2.29214	..
GDP per capita growth (annual %)	NY.GDP.PCAP.KD.ZG	Central African Republic	CAF	-1.35013	2.64653	2.61065	-0.0996463	9.30502	5.47038	2.55065	4.00964	-36.8245	0.497507	4.19878	2.87599	2.78611	1.97803	1.7229	-0.744489	-0.705469	0.730966	-0.362885	-1.85606
GDP per capita growth (annual %)	NY.GDP.PCAP.KD.ZG	Chad	TCD	12.6968	-4.03678	0.822607	-0.437231	-4.8014	9.92359	0.927027	5.28853	-0.797613	-1.51638	0.0739226	-7.09226	-4.82738	2.24769	2.04929	-3.52797	-3.10157	9.06081	-0.5376	-1.35007
GDP per capita growth (annual %)	NY.GDP.PCAP.KD.ZG	Channel Islands	CHI	..	..	..	..	..	-4.28118	0.438027	-6.37565	-0.133469	1.82976	-0.0726855	0.948077	1.53635	0.736021	1.15023	-9.22341	9.60318	5.04335	3.42061	..
GDP per capita growth (annual %)	NY.GDP.PCAP.KD.ZG	Chile	CHL	4.79183	5.01952	4.14386	2.75756	-2.11061	4.79364	5.18104	5.14158	2.32789	0.783002	1.1137	0.529834	-0.23511	2.14988	-0.962096	-6.98113	10.8246	1.64878	-0.0196132	2.09415
GDP per capita growth (annual %)	NY.GDP.PCAP.KD.ZG	China	CHN	10.8046	12.0473	13.5554	9.10975	8.8599	10.0634	8.86481	7.12701	7.06322	6.78667	6.35855	6.16543	6.24627	6.25861	5.6929	2.09687	8.47323	3.1477	5.52431	5.10662
GDP per capita growth (annual %)	NY.GDP.PCAP.KD.ZG	Colombia	COL	3.37111	5.31174	5.39447	2.04799	-0.0317051	3.31435	5.80824	2.8757	4.14129	3.57031	2.06923	1.08115	-0.101222	0.695265	1.36014	-8.50949	9.59298	6.1878	-0.41023	0.656438
GDP per capita growth (annual %)	NY.GDP.PCAP.KD.ZG	Comoros	COM	0.760069	0.597251	-1.18907	1.91937	4.39019	2.73828	3.79276	4.19357	6.64888	1.65994	-0.138355	0.69356	3.51293	2.0473	1.65416	1.98463	0.715538	0.844579	1.10139	1.45123
GDP per capita growth (annual %)	NY.GDP.PCAP.KD.ZG	Congo, Dem. Rep.	COD	2.92453	2.12363	3.09293	3.07015	-0.27553	3.74773	3.42588	3.57071	4.85378	5.82071	3.44319	-1.16313	0.00232954	2.33763	1.12791	-1.48924	2.81656	5.46936	5.12591	3.27236
GDP per capita growth (annual %)	NY.GDP.PCAP.KD.ZG	Congo, Rep.	COG	3.94159	4.01799	-9.96945	2.86698	7.26428	5.47047	-1.06296	6.91517	-3.09694	4.10028	-1.98215	-10.8701	-7.86139	-4.65814	-1.27988	-8.48579	-1.37465	-0.927744	-0.528875	0.148774
GDP per capita growth (annual %)	NY.GDP.PCAP.KD.ZG	Costa Rica	CRI	2.48428	5.83403	6.75979	3.32734	-2.18937	4.06134	3.18309	3.66597	1.36003	2.43499	2.55664	3.15607	3.17872	1.69193	1.56256	-4.93444	7.38823	4.10345	4.62275	3.82533
GDP per capita growth (annual %)	NY.GDP.PCAP.KD.ZG	Cote d'Ivoire	CIV	-1.38665	0.42196	-1.22416	2.426	1.32619	4.51931	-7.40425	5.39584	8.57322	6.7517	4.14233	4.10858	4.42161	2.05335	3.96245	-1.81621	4.44709	3.75602	3.81819	3.40005
GDP per capita growth (annual %)	NY.GDP.PCAP.KD.ZG	Croatia	HRV	4.19286	5.05675	5.07184	1.9807	-6.71603	-1.11003	0.247771	-1.78906	0.498388	0.20789	3.55234	4.5912	4.95383	4.26251	4.1286	-7.48747	13.6545	7.9374	3.19428	3.63735
GDP per capita growth (annual %)	NY.GDP.PCAP.KD.ZG	Cuba	CUB	10.9667	11.9069	7.17925	4.07543	1.42475	2.36597	2.76444	3.00028	2.79315	1.15853	4.53754	0.597184	1.97075	2.43657	0.0532187	-10.738	1.74699	2.34879	-1.57438	..
GDP per capita growth (annual %)	NY.GDP.PCAP.KD.ZG	Curacao	CUW	-1.85844	-0.940962	0.466174	0.910342	-1.1769	-1.17627	-0.909567	-1.17256	-1.75581	-1.96747	-0.85878	-2.11116	-1.59116	-1.58863	-2.0411	-17.1257	5.94644	9.63039	0.320175	..
GDP per capita growth (annual %)	NY.GDP.PCAP.KD.ZG	Cyprus	CYP	3.35375	2.98125	2.88426	1.07674	-4.61048	-0.357614	-2.11294	-4.90739	-6.37008	-0.688973	4.00942	6.08588	4.77172	4.98319	4.44896	-4.31145	10.3552	5.75461	1.16776	2.03405
GDP per capita growth (annual %)	NY.GDP.PCAP.KD.ZG	Czechia	CZE	6.22799	6.33483	4.87505	1.76471	-5.33917	2.41583	1.56219	-0.909418	-0.074963	2.13763	4.75262	2.38405	4.89455	2.48699	3.15875	-5.53492	5.93107	1.24409	-1.82088	0.951989
GDP per capita growth (annual %)	NY.GDP.PCAP.KD.ZG	Denmark	DNK	2.07801	3.47586	0.540322	-1.00056	-5.48158	1.13267	0.894526	-0.380977	0.970846	0.765766	1.38567	2.2718	2.39559	1.3562	1.34779	-2.06614	6.91766	0.743682	1.73831	3.15513
GDP per capita growth (annual %)	NY.GDP.PCAP.KD.ZG	Djibouti	DJI	..	..	..	..	..	..	..	..	..	5.28018	5.45837	5.33332	3.73972	3.10862	3.91378	-0.306868	2.9117	3.7008	5.89617	4.52343
GDP per capita growth (annual %)	NY.GDP.PCAP.KD.ZG	Dominica	DMA	0.790489	4.29153	5.29519	7.11042	-1.15011	-0.0983573	-0.238325	-0.251286	-0.851878	1.37837	-3.42416	2.61904	-6.04609	3.45033	4.39831	-15.3234	5.96161	11.018	4.14468	2.52289
GDP per capita growth (annual %)	NY.GDP.PCAP.KD.ZG	Dominican Republic	DOM	8.00661	7.81376	6.11794	2.00088	-0.268927	7.02231	1.89038	1.5021	3.66423	5.84761	5.76452	5.54041	2.80932	5.95314	3.81573	-8.88467	12.8319	4.23289	1.28565	4.06734
GDP per capita growth (annual %)	NY.GDP.PCAP.KD.ZG	Ecuador	ECU	3.59103	2.5636	0.176823	4.76318	-0.618744	2.29903	6.71525	4.11234	5.61781	2.74412	-1.30275	-2.12551	4.36195	-0.674559	-1.51253	-10.3108	8.5779	5.0283	1.10231	-2.84096
GDP per capita growth (annual %)	NY.GDP.PCAP.KD.ZG	Egypt, Arab Rep.	EGY	2.38032	4.77751	5.08547	5.17381	2.71553	3.14978	-0.354646	-0.042967	-0.143234	0.599559	2.20416	2.24497	2.12015	3.35167	3.71584	1.88112	1.7622	5.01556	2.02316	0.639636
GDP per capita growth (annual %)	NY.GDP.PCAP.KD.ZG	El Salvador	SLV	2.66532	4.39365	1.72042	1.82447	-2.41599	1.81802	3.40079	2.48638	1.76908	1.33133	2.05687	2.25589	2.03809	2.30914	2.39613	-8.07563	11.5272	2.55237	3.05827	2.13955
GDP per capita growth (annual %)	NY.GDP.PCAP.KD.ZG	Equatorial Guinea	GNQ	10.9012	3.03106	10.1969	12.5327	-3.22046	-13.0152	1.99906	3.988	-7.88856	-3.43059	-12.4917	-12.0971	-8.94054	-9.37042	-8.52391	-7.35875	-1.56652	0.661786	-7.34984	-1.49035
GDP per capita growth (annual %)	NY.GDP.PCAP.KD.ZG	Eritrea	ERI	0.148823	-2.51821	-0.0417696	-12.1248	1.30258	0.205919	6.74798	..	..	..	..	..	..	..	..	..	..	..	..	..
GDP per capita growth (annual %)	NY.GDP.PCAP.KD.ZG	Estonia	EST	10.1516	10.4117	8.06277	-4.87058	-14.4655	2.68366	7.93415	4.04377	2.11928	3.59412	1.77142	3.06301	5.50686	3.33941	3.34196	-3.07548	7.04093	-1.26803	-4.5408	-0.384591
GDP per capita growth (annual %)	NY.GDP.PCAP.KD.ZG	Eswatini	SWZ	5.42282	5.46301	3.83512	0.143515	0.916042	3.18714	1.68168	4.83113	3.29806	0.872701	1.46527	4.06628	0.695732	-0.664047	5.0991	-3.90981	2.24648	0.0972095	2.47023	1.62357
GDP per capita growth (annual %)	NY.GDP.PCAP.KD.ZG	Ethiopia	ETH	8.5509	7.62654	8.23771	7.62787	5.75639	9.40434	8.06142	5.64374	7.61661	7.33862	7.46808	6.50991	6.61862	3.97408	5.48664	3.22312	2.85566	2.5954	3.85475	4.57967
GDP per capita growth (annual %)	NY.GDP.PCAP.KD.ZG	Faroe Islands	FRO	..	..	..	..	-5.03062	-0.105467	3.80958	7.64027	5.95488	5.03591	-0.0185248	0.232466	2.03504	1.11936	2.92985	-3.08562	4.04369	2.3616	1.52515	..
GDP per capita growth (annual %)	NY.GDP.PCAP.KD.ZG	Fiji	FJI	-0.21447	0.938933	-1.67525	0.410202	-1.80343	2.59506	2.41604	1.1975	4.57032	5.46161	4.38823	2.38012	5.40003	3.99107	-0.33408	-17.0445	-5.06241	19.4395	6.97477	3.3104
GDP per capita growth (annual %)	NY.GDP.PCAP.KD.ZG	Finland	FIN	2.42616	3.62113	4.86572	0.316321	-8.5146	2.69738	1.91685	-1.99029	-1.4349	-0.888802	0.136128	2.27754	3.06123	1.05884	1.23812	-2.631	2.46373	0.489395	-1.44014	-1.09831
GDP per capita growth (annual %)	NY.GDP.PCAP.KD.ZG	France	FRA	1.12535	2.00131	1.89857	-0.178411	-3.32212	1.49872	1.94434	-0.299599	0.262145	0.519384	0.708031	0.594244	1.7878	1.28217	1.68871	-7.74057	6.50155	2.23599	0.607649	0.827703
GDP per capita growth (annual %)	NY.GDP.PCAP.KD.ZG	French Polynesia	PYF	-1.17937	-0.534705	0.477743	-0.716512	-4.62302	-2.86221	-3.37157	-1.41985	-0.201995	-0.0102536	1.26147	1.82143	3.95416	1.97026	2.98746	-7.1092	1.8818	4.24804	2.7258	..
GDP per capita growth (annual %)	NY.GDP.PCAP.KD.ZG	Gabon	GAB	-0.262444	-5.69608	2.74524	-6.37299	-3.14683	3.45835	3.35938	1.55231	1.98481	0.869785	0.693297	-0.791832	-2.16362	-1.68805	1.38258	-4.15528	-0.845245	0.747534	0.217772	1.17844
GDP per capita growth (annual %)	NY.GDP.PCAP.KD.ZG	Gambia, The	GMB	-5.03011	-3.35222	0.0963372	3.21188	3.61239	2.87351	-10.7773	2.18646	-0.0966163	-4.17259	1.25137	-0.701008	2.20808	4.66787	3.74848	-1.76319	2.79305	3.07381	2.4134	3.36576
GDP per capita growth (annual %)	NY.GDP.PCAP.KD.ZG	Georgia	GEO	10.2896	10.0453	13.1644	2.73323	-2.79118	7.02428	8.80363	7.36675	5.44978	4.04163	3.18839	3.38835	5.14583	6.10345	5.56167	-6.35479	11.0651	10.8422	7.74569	10.6686
GDP per capita growth (annual %)	NY.GDP.PCAP.KD.ZG	Germany	DEU	0.942995	3.97295	3.02778	1.10246	-5.30553	4.30644	5.69928	0.28585	0.112644	1.74446	0.776508	1.47229	2.33287	0.813017	0.760402	-4.17345	3.62613	0.641609	-0.389989	0.228526
GDP per capita growth (annual %)	NY.GDP.PCAP.KD.ZG	Ghana	GHA	3.15861	3.66951	1.69172	6.41467	2.26069	5.30618	11.337	6.67975	4.75796	0.452244	-0.208326	1.04704	5.78095	4.01895	4.39063	-1.46831	3.038	1.83051	1.19022	3.72174
GDP per capita growth (annual %)	NY.GDP.PCAP.KD.ZG	Gibraltar	GIB	..	..	..	..	..	..	..	..	..	..	..	..	..	..	..	..	..	..	..	..
GDP per capita growth (annual %)	NY.GDP.PCAP.KD.ZG	Greece	GRC	0.887221	6.12419	3.24351	-0.207784	-4.37114	-5.81521	-9.74334	-7.83409	-1.5609	1.46586	0.431226	0.384852	1.67402	2.27195	2.38498	-9.00116	9.98468	7.08433	2.63988	2.43696
GDP per capita growth (annual %)	NY.GDP.PCAP.KD.ZG	Greenland	GRL	4.91926	5.85317	2.75059	6.59398	0.874907	1.35612	-1.11918	1.53698	-0.726862	5.09193	-2.21492	4.54781	0.0776648	0.890685	2.46273	-0.00176248	1.12102	1.99015	0.504111	..
GDP per capita growth (annual %)	NY.GDP.PCAP.KD.ZG	Grenada	GRD	12.8519	-4.34488	5.75185	0.607094	-6.91379	-0.807154	0.321541	-1.76487	1.70896	6.7355	5.94027	3.33052	4.16002	4.13322	0.424779	-14.0235	4.37616	7.1142	4.52956	3.58159
GDP per capita growth (annual %)	NY.GDP.PCAP.KD.ZG	Guam	GUM	3.29235	-3.92957	0.456381	1.77226	0.148561	2.04893	0.0650357	2.26403	1.91405	2.08831	1.18092	0.591903	1.34861	-0.333833	3.07548	-10.712	1.07831	4.17727	..	..
GDP per capita growth (annual %)	NY.GDP.PCAP.KD.ZG	Guatemala	GTM	1.06472	3.14601	4.12108	1.19481	-1.50525	0.865525	2.10759	0.944367	1.68869	2.48328	2.20204	0.803225	1.22202	1.69836	2.44814	-3.22008	6.56016	2.72969	1.95109	2.06653
GDP per capita growth (annual %)	NY.GDP.PCAP.KD.ZG	Guinea	GIN	0.957366	-0.903895	4.37308	1.64417	-3.50758	2.26713	3.02826	3.34759	1.43532	1.15631	1.23053	8.01216	7.5159	3.68701	2.9464	2.06695	2.96921	1.42306	2.97503	3.16684
GDP per capita growth (annual %)	NY.GDP.PCAP.KD.ZG	Guinea-Bissau	GNB	4.08996	0.220591	0.0376503	1.92083	-0.124227	2.91053	5.28027	-4.29239	0.543365	-1.65358	3.44072	2.81766	2.14454	1.32711	3.12319	-0.182996	2.90724	3.24389	2.14432	2.52743
GDP per capita growth (annual %)	NY.GDP.PCAP.KD.ZG	Guyana	GUY	-1.75716	5.39944	7.48936	2.0593	3.95757	4.53289	5.63373	5.25729	3.13748	1.11916	0.0833712	3.15936	3.06887	1.39605	3.25156	43.5123	18.882	62.1111	33.0314	42.5553
GDP per capita growth (annual %)	NY.GDP.PCAP.KD.ZG	Haiti	HTI	1.35443	0.0540583	2.9557	0.961803	4.15489	-6.7459	3.91514	-1.04324	2.76751	1.39231	-0.0454395	0.398403	1.12394	0.326679	-2.98684	-4.49816	-2.92696	-2.78468	-2.99213	-5.26985
GDP per capita growth (annual %)	NY.GDP.PCAP.KD.ZG	Honduras	HND	3.50708	4.08321	3.77628	1.91883	-4.54399	1.54912	1.71164	2.04383	0.777167	1.08128	1.88202	1.96051	2.92107	1.96197	0.719362	-10.5484	10.703	2.41185	1.8149	1.82402
GDP per capita growth (annual %)	NY.GDP.PCAP.KD.ZG	Hong Kong SAR, China	HKG	6.92005	6.34739	5.55358	1.51878	-2.66897	5.98639	4.11212	0.58374	2.6879	2.04319	1.51996	1.54455	3.00148	2.02721	-2.39663	-6.20874	7.42949	-2.8053	0.612247	2.70474
GDP per capita growth (annual %)	NY.GDP.PCAP.KD.ZG	Hungary	HUN	4.50792	4.0959	0.487905	1.17043	-6.59559	1.29664	2.20591	-0.828647	2.52439	4.75555	4.03311	2.83749	4.47744	5.82146	5.20876	-4.09731	7.66253	4.55106	-0.709301	0.826299
GDP per capita growth (annual %)	NY.GDP.PCAP.KD.ZG	Iceland	ISL	4.45783	3.85035	5.74528	0.3264	-7.97836	-2.69285	1.53515	0.527304	3.56818	0.562209	3.35415	4.8383	1.77941	2.11737	-0.354233	-8.4387	3.32561	6.27363	2.59913	-2.2807
GDP per capita growth (annual %)	NY.GDP.PCAP.KD.ZG	India	IND	6.17703	6.38368	6.0516	1.61413	6.31341	6.9308	3.76074	4.01727	4.9777	6.06398	6.71567	6.97395	5.56119	5.29212	2.79676	-6.69047	8.79093	6.76239	8.23053	5.53997
GDP per capita growth (annual %)	NY.GDP.PCAP.KD.ZG	Indonesia	IDN	4.34436	4.11202	4.94958	4.64722	3.3116	4.89326	4.82294	4.6754	4.25604	3.77969	3.70583	3.91054	4.0011	4.1593	4.0413	-2.89423	2.97476	4.52448	4.16753	4.179
GDP per capita growth (annual %)	NY.GDP.PCAP.KD.ZG	Iran, Islamic Rep.	IRN	0.931246	2.76183	6.40171	-0.959303	-0.239219	4.48195	1.38496	-4.94409	-2.80062	3.58412	-2.75798	7.26636	1.2907	-3.08187	-4.11018	2.53897	3.85313	2.53773	3.78765	1.96082
GDP per capita growth (annual %)	NY.GDP.PCAP.KD.ZG	Iraq	IRQ	-1.29395	4.86653	2.69566	6.06351	-0.359809	3.01925	3.81442	8.88055	2.66465	-1.28425	-0.153622	11.0984	-3.98547	0.267763	3.14044	-13.9675	-0.747456	5.51098	-1.72015	-3.61512
GDP per capita growth (annual %)	NY.GDP.PCAP.KD.ZG	Ireland	IRL	3.46094	2.19519	2.30923	-6.41164	-6.05481	1.13042	1.20648	-0.820121	1.65549	8.5397	23.4437	-0.0688065	8.57416	5.9947	3.385	5.81217	14.6442	6.48891	-7.21671	-0.145596
GDP per capita growth (annual %)	NY.GDP.PCAP.KD.ZG	Isle of Man	IMN	4.93577	6.65645	6.36998	3.77209	0.979767	2.24855	1.38473	7.36369	4.38198	5.46721	-0.0295616	7.11504	2.66187	1.97434	0.0733713	-8.95285	3.78598	-4.19501	..	..
GDP per capita growth (annual %)	NY.GDP.PCAP.KD.ZG	Israel	ISR	2.56366	3.7512	4.45161	1.40447	-1.15337	3.62399	3.58664	0.57319	2.16142	1.8028	0.231916	2.43195	2.34341	2.01931	1.74946	-3.73449	7.56395	4.19415	-1.18723	-0.396213
GDP per capita growth (annual %)	NY.GDP.PCAP.KD.ZG	Italy	ITA	0.17602	1.39301	0.846873	-1.7836	-5.85256	1.08111	0.347491	-3.38984	-2.01397	-0.0164635	1.03827	1.42884	1.795	0.581228	1.13464	-8.42324	9.49416	5.03345	0.749845	0.738518
GDP per capita growth (annual %)	NY.GDP.PCAP.KD.ZG	Jamaica	JAM	0.336549	2.3695	0.952341	-1.24242	-4.74232	-1.87207	1.29088	-1.04152	0.111201	0.327177	0.605132	1.10893	0.787328	1.73337	0.778866	-10.158	4.34549	5.16734	2.58147	-0.697441
GDP per capita growth (annual %)	NY.GDP.PCAP.KD.ZG	Japan	JPN	1.79434	1.30813	1.36742	-1.27211	-5.68145	4.07922	0.209252	1.53679	2.15237	0.429381	1.66847	0.805363	1.75861	0.771168	-0.262171	-3.88642	3.17002	1.39103	1.9708	0.520666
GDP per capita growth (annual %)	NY.GDP.PCAP.KD.ZG	Jordan	JOR	5.50057	1.4032	1.84052	4.7256	2.79012	0.137449	0.2186	0.988823	-2.58592	-6.02217	-5.5898	-2.71126	0.192084	-0.302782	-0.247049	-2.86254	1.77173	0.915647	1.23863	1.48056
GDP per capita growth (annual %)	NY.GDP.PCAP.KD.ZG	Kazakhstan	KAZ	8.88964	9.76787	7.87178	2.23527	0.022848	5.9173	5.95765	3.34601	4.4882	2.68064	-0.299094	-0.438395	2.49077	2.55607	2.99406	-3.86406	2.91864	1.701	3.57239	3.46425
GDP per capita growth (annual %)	NY.GDP.PCAP.KD.ZG	Kenya	KEN	2.70244	3.27715	3.66979	-2.75886	0.232598	4.96811	2.26952	1.87671	1.26331	2.59218	2.65589	1.93795	1.60475	3.52405	3.07005	-2.21032	5.56514	2.86281	3.48336	2.47086
GDP per capita growth (annual %)	NY.GDP.PCAP.KD.ZG	Kiribati	KIR	-0.722363	3.68079	0.984245	-4.98979	-1.58315	-0.857159	1.45038	4.26114	6.26029	-0.0428972	9.84706	5.58491	2.19903	1.94612	1.7335	-3.16992	6.55481	2.88966	1.05565	3.71119
GDP per capita growth (annual %)	NY.GDP.PCAP.KD.ZG	Korea, Dem. People's Rep.	PRK	..	..	..	..	..	..	..	..	..	..	..	..	..	..	..	..	..	..	..	..
GDP per capita growth (annual %)	NY.GDP.PCAP.KD.ZG	Korea, Rep.	KOR	4.08765	4.71293	5.26636	2.23375	0.275269	6.27402	2.89141	1.8656	2.69615	2.55622	2.26843	2.53914	2.8702	2.46225	1.88891	-0.846212	4.43912	2.80524	1.27824	..
GDP per capita growth (annual %)	NY.GDP.PCAP.KD.ZG	Kosovo	XKX	..	..	..	..	5.39637	5.28831	6.12959	0.857974	4.70387	3.65273	7.36815	6.20762	4.03839	3.05753	5.2367	-5.4069	10.9981	5.3391	9.35108	15.0325
GDP per capita growth (annual %)	NY.GDP.PCAP.KD.ZG	Kuwait	KWT	6.67936	1.69764	-0.0585846	-3.06796	-11.8648	-7.27588	2.99936	0.0983288	-3.77372	-3.83157	-3.8327	-1.43152	-8.16879	-1.2657	-0.471028	-3.90823	2.59129	1.43711	-7.01146	-4.9196
GDP per capita growth (annual %)	NY.GDP.PCAP.KD.ZG	Kyrgyz Republic	KGZ	-1.29559	2.00174	7.51249	7.37555	1.53257	-1.88093	4.43705	-1.95288	8.51417	1.75719	1.56808	2.04985	2.55838	1.54587	2.2812	-9.03158	3.58777	7.03043	7.10119	7.15558
GDP per capita growth (annual %)	NY.GDP.PCAP.KD.ZG	Lao PDR	LAO	5.50362	6.91295	5.94392	6.19879	5.90564	6.94117	6.48537	6.49514	6.51642	6.13843	5.71703	5.36289	5.22711	4.60986	3.86091	-0.986716	1.06109	1.2697	2.31116	2.85166
GDP per capita growth (annual %)	NY.GDP.PCAP.KD.ZG	Latvia	LVA	12.8279	13.8647	11.3194	-2.36804	-14.6423	-1.63514	4.92958	8.6445	3.19545	3.06097	4.63645	3.49319	4.31936	5.1256	1.37775	-2.78996	7.8482	2.08342	2.96039	0.359554
GDP per capita growth (annual %)	NY.GDP.PCAP.KD.ZG	Lebanon	LBN	1.10688	-0.16111	7.21242	7.2702	8.75424	6.92562	-0.21599	-0.172272	-5.35005	-7.26145	-1.4853	3.9542	3.57186	1.00113	-3.87037	-20.1291	-7.25697	-1.07782	-1.25913	..
GDP per capita growth (annual %)	NY.GDP.PCAP.KD.ZG	Lesotho	LSO	4.4225	4.65949	3.75026	4.8112	-1.9687	4.45926	3.69399	5.27067	0.696148	0.557309	1.92251	2.35364	-4.33656	-2.67594	-2.56926	-9.23727	1.09936	1.28746	0.70936	1.62133
GDP per capita growth (annual %)	NY.GDP.PCAP.KD.ZG	Liberia	LBR	0.684613	2.17025	4.21344	2.88474	2.0418	3.07118	4.04087	4.24346	6.32411	-1.37371	-2.06002	-3.5459	0.483418	-0.80229	-4.38161	-4.9747	2.79369	2.58506	2.40186	2.55648
GDP per capita growth (annual %)	NY.GDP.PCAP.KD.ZG	Libya	LBY	9.53922	4.3383	4.06916	-2.26034	-6.37107	2.90737	-49.1279	91.7814	-19.6277	-24.5111	-2.43005	-2.98083	30.3951	6.20327	-12.4989	-30.4002	26.7187	-9.37731	8.92161	-1.6207
GDP per capita growth (annual %)	NY.GDP.PCAP.KD.ZG	Liechtenstein	LIE	3.90507	7.76432	2.66666	1.19257	-1.90139	..	..	..	..	..	..	..	..	..	..	..	..	..	..	..
GDP per capita growth (annual %)	NY.GDP.PCAP.KD.ZG	Lithuania	LTU	9.50011	9.12368	12.4053	3.66012	-13.8878	2.55534	8.75224	5.74398	5.02683	4.62035	3.75632	3.87744	5.88873	5.79067	4.97938	0.0684462	6.45536	1.69529	-1.05358	2.18654
GDP per capita growth (annual %)	NY.GDP.PCAP.KD.ZG	Luxembourg	LUX	0.926766	4.33911	6.44203	-2.06647	-5.01426	1.88355	-1.1768	-0.762183	0.814652	0.232565	-0.115477	2.73979	-1.11611	-0.32984	0.752174	-2.15417	5.31843	-3.06966	-2.67952	-0.651009
GDP per capita growth (annual %)	NY.GDP.PCAP.KD.ZG	Macao SAR, China	MAC	3.78418	7.61765	9.64163	-0.39481	2.35338	24.6568	18.8283	5.72193	6.26215	-6.7435	-24.1024	-2.14046	10.5547	4.70964	-4.46285	-55.2289	24.0608	-18.9921	74.675	7.50943
GDP per capita growth (annual %)	NY.GDP.PCAP.KD.ZG	Madagascar	MDG	1.73177	2.34726	2.6531	3.62579	-6.75695	-2.2658	-1.26548	0.200641	-0.444342	0.60571	0.445749	1.31064	1.26237	0.542519	1.73014	-9.49183	2.05116	1.60268	1.66888	1.69312
GDP per capita growth (annual %)	NY.GDP.PCAP.KD.ZG	Malawi	MWI	0.539881	1.85481	6.55135	4.55856	5.17235	3.76962	1.91799	-0.983601	2.46076	2.70386	0.00792518	-0.256367	1.22138	1.603	2.95151	-1.82835	1.88076	-1.63749	-0.694163	-0.763124
GDP per capita growth (annual %)	NY.GDP.PCAP.KD.ZG	Malaysia	MYS	2.97037	3.25941	4.0133	2.65806	-3.45603	5.43424	3.46597	3.69277	2.91923	4.20448	3.28579	2.62005	3.96187	3.07402	2.7595	-6.70934	2.13146	7.56568	2.28544	3.83894
GDP per capita growth (annual %)	NY.GDP.PCAP.KD.ZG	Maldives	MDV	-12.6313	20.7066	3.62433	5.18658	-11.5265	3.08075	5.09117	-1.08988	3.4315	4.32798	0.341528	2.73896	3.57473	5.16983	3.71535	-34.8312	33.7686	12.0991	4.35049	4.77442
GDP per capita growth (annual %)	NY.GDP.PCAP.KD.ZG	Mali	MLI	4.0407	3.2123	0.515196	3.0932	1.27968	3.50417	0.710473	-3.43194	-0.564984	4.25477	2.71018	2.70047	2.06892	1.64098	1.87829	-4.10677	-0.00652431	0.439683	1.64872	1.96118
GDP per capita growth (annual %)	NY.GDP.PCAP.KD.ZG	Malta	MLT	2.22696	1.96395	4.67098	3.73298	-2.13593	5.677	0.564965	3.17069	5.09521	5.47816	6.97101	1.72254	9.9245	3.4684	-0.0482197	-5.52893	12.7181	1.72439	2.61641	1.98417
GDP per capita growth (annual %)	NY.GDP.PCAP.KD.ZG	Marshall Islands	MHL	1.56552	0.010252	3.60284	-7.55746	3.68716	5.48849	-0.239905	-0.353869	5.32061	0.495281	3.96522	4.84813	6.18444	8.38496	13.6597	0.189049	4.49872	2.06475	-0.842142	6.27166
GDP per capita growth (annual %)	NY.GDP.PCAP.KD.ZG	Mauritania	MRT	5.96596	15.4039	-4.48587	-3.15558	-2.98569	-0.603277	0.846509	1.11502	0.935521	1.1807	2.2558	-1.7298	3.14237	1.70257	0.139309	-3.22895	-2.12418	3.71273	3.39402	2.20941
GDP per capita growth (annual %)	NY.GDP.PCAP.KD.ZG	Mauritius	MUS	1.1767	4.37759	5.2465	5.00654	3.0411	4.1292	3.911	3.2095	3.11041	3.63919	3.55336	3.79113	3.84431	3.95004	2.85813	-14.5485	3.37767	9.02116	5.13122	4.82125
GDP per capita growth (annual %)	NY.GDP.PCAP.KD.ZG	Mexico	MEX	0.745413	3.39578	0.650789	-0.51989	-7.65517	3.47084	1.99026	2.15732	-0.447811	1.27091	1.60971	0.790955	0.923425	1.01137	-1.33462	-9.10287	5.34307	2.93286	2.39839	0.58478
GDP per capita growth (annual %)	NY.GDP.PCAP.KD.ZG	Micronesia, Fed. Sts.	FSM	2.51172	0.535266	-1.07771	-1.5628	2.00985	2.65591	3.03719	-2.04146	-3.88556	-2.55363	4.31393	0.153377	0.449152	-0.389413	3.7296	-2.235	2.44577	-3.33022	0.0218016	0.247352
GDP per capita growth (annual %)	NY.GDP.PCAP.KD.ZG	Moldova	MDA	7.76189	5.09167	3.23895	8.00539	-5.88124	7.20697	5.87939	-0.576701	9.07308	5.06367	0.429159	5.87018	5.99041	5.92037	5.22281	-7.26327	15.6558	-2.0664	4.11814	2.97333
GDP per capita growth (annual %)	NY.GDP.PCAP.KD.ZG	Monaco	MCO	2.20227	6.32269	15.2283	0.750036	-12.7835	-0.39385	4.55377	-1.214	7.30191	5.16659	3.1151	1.57424	-4.23891	4.37924	7.24738	-13.1046	20.7189	9.89457	4.97597	..
GDP per capita growth (annual %)	NY.GDP.PCAP.KD.ZG	Mongolia	MNG	6.06988	7.25546	8.77844	7.1967	-3.02646	4.52004	15.283	10.2081	9.36488	5.55131	0.223539	-0.547071	3.62201	5.75427	3.67988	-6.26542	-0.0614213	3.50308	5.95952	3.5656
GDP per capita growth (annual %)	NY.GDP.PCAP.KD.ZG	Montenegro	MNE	4.0266	8.43155	6.66274	7.03263	-5.99698	2.54625	3.07586	-2.89176	3.35455	1.5949	3.24026	2.83371	4.61124	5.0014	4.01064	-15.2849	13.3214	6.65615	6.34827	2.99043
GDP per capita growth (annual %)	NY.GDP.PCAP.KD.ZG	Morocco	MAR	1.78495	6.31205	2.03303	4.24978	2.34393	2.07976	4.06561	1.66385	2.75786	1.43852	3.10635	-0.693617	3.78371	1.91411	1.81642	-8.13867	7.06063	0.496491	2.33823	2.22355
GDP per capita growth (annual %)	NY.GDP.PCAP.KD.ZG	Mozambique	MOZ	3.88124	7.35939	5.11813	4.27502	3.21965	3.86195	4.19034	4.93805	3.535	4.62514	4.32231	1.6732	-0.383714	0.445674	-0.646284	-4.10527	-0.606316	1.33336	2.36824	-1.07924
GDP per capita growth (annual %)	NY.GDP.PCAP.KD.ZG	Myanmar	MMR	12.6841	12.2555	11.2004	9.64981	9.93736	8.82059	4.74658	6.43325	7.50874	7.27569	6.1396	5.02652	5.31957	5.5018	5.83309	-9.69306	-12.6271	3.32203	0.255329	-1.63761
GDP per capita growth (annual %)	NY.GDP.PCAP.KD.ZG	Namibia	NAM	1.25194	5.71286	3.97964	1.22288	-1.16874	4.40997	3.30349	2.74809	2.90208	3.35635	1.53446	-2.62833	-3.69773	-1.70343	-3.57649	-10.7373	0.588993	2.51309	1.85445	1.41712
GDP per capita growth (annual %)	NY.GDP.PCAP.KD.ZG	Nauru	NRU	-0.246575	8.4907	-22.0766	20.5132	-5.71787	-0.428391	13.7716	23.2172	1.18393	13.9848	0.710435	2.52869	-7.45542	-2.53597	7.45683	1.49131	6.6023	2.14891	0.0192243	1.14698
GDP per capita growth (annual %)	NY.GDP.PCAP.KD.ZG	Nepal	NPL	2.32755	2.36866	2.55046	5.31231	3.8291	4.16886	2.96036	4.40245	3.31847	5.69591	3.4108	-0.040511	8.76021	7.3601	5.40192	-4.23183	3.02972	4.77666	2.05406	3.81767
GDP per capita growth (annual %)	NY.GDP.PCAP.KD.ZG	Netherlands	NLD	1.79583	3.37121	3.65958	1.72006	-4.15945	0.800961	1.29975	-1.34364	-0.32453	1.24764	1.66899	1.88065	2.17569	1.66336	1.63214	-4.40053	5.72194	4.01098	-0.911428	0.322423
GDP per capita growth (annual %)	NY.GDP.PCAP.KD.ZG	New Caledonia	NCL	..	..	..	..	..	..	..	..	..	..	..	..	..	3.99754	-1.4226	-2.59577	-2.45629	2.81186	..	..
GDP per capita growth (annual %)	NY.GDP.PCAP.KD.ZG	New Zealand	NZL	2.19287	1.53452	2.09998	-1.85355	-1.03184	0.336941	1.31801	1.80665	1.80432	2.11606	1.60054	1.47418	1.24183	1.63368	0.702322	-2.48121	4.10387	3.37908	-1.07826	-1.87568
GDP per capita growth (annual %)	NY.GDP.PCAP.KD.ZG	Nicaragua	NIC	2.93169	2.67777	3.57801	1.96392	-4.66051	2.93881	4.8258	5.01208	3.47943	3.35791	3.37914	3.16651	3.24692	-4.62942	-4.14857	-3.4518	9.13331	2.22854	3.00511	2.20199
GDP per capita growth (annual %)	NY.GDP.PCAP.KD.ZG	Niger	NER	3.5059	2.12703	-0.585039	3.81608	-1.75786	4.60767	-1.38136	6.45538	1.43045	2.7795	0.60432	1.92621	1.33286	3.57479	2.4327	0.189465	-1.86258	8.31986	-1.62762	4.92199
GDP per capita growth (annual %)	NY.GDP.PCAP.KD.ZG	Nigeria	NGA	3.53184	3.17093	3.67721	3.83259	5.06718	5.02854	2.39735	1.37822	3.81449	3.53757	0.0819796	-4.01893	-1.61586	-0.406837	-0.0100048	-3.8642	1.49716	1.11327	0.724296	1.29437
GDP per capita growth (annual %)	NY.GDP.PCAP.KD.ZG	North Macedonia	MKD	5.29102	5.7192	7.08314	6.08402	0.287982	4.02172	2.81001	-0.0653472	3.3056	3.90793	4.13429	3.17823	1.48937	3.40375	4.6187	-3.65437	5.59213	3.06194	2.29011	4.79953
GDP per capita growth (annual %)	NY.GDP.PCAP.KD.ZG	Northern Mariana Islands	MNP	-10.4853	-4.30545	-3.92766	-8.28282	-14.8542	3.70913	-6.54978	1.51907	3.60739	5.33556	4.71604	31.0979	25.1776	-18.0506	-9.70327	-28.1628	6.19657	18.9236	..	..
GDP per capita growth (annual %)	NY.GDP.PCAP.KD.ZG	Norway	NOR	1.98814	1.63957	1.85464	-0.762648	-3.16926	-0.460631	-0.197406	1.37764	-0.197883	0.903763	0.848799	0.277408	1.63951	0.165561	0.443399	-1.8577	3.3545	2.32282	-1.06043	1.13524
GDP per capita growth (annual %)	NY.GDP.PCAP.KD.ZG	Oman	OMN	0.482138	2.38092	2.71866	6.61242	3.68718	-0.232906	-7.78415	-5.57203	-2.64416	-2.97274	0.43845	0.118554	-2.9349	-0.0452382	-0.985733	-1.91105	3.0853	2.73959	-5.20647	-2.7973
GDP per capita growth (annual %)	NY.GDP.PCAP.KD.ZG	Pakistan	PAK	4.72863	3.55533	1.72148	-0.577212	0.876151	-0.975475	0.408755	1.08227	2.68233	2.566	2.76649	5.19507	2.96624	4.44202	0.778096	-3.03889	4.52305	2.9625	-1.5761	1.68806
GDP per capita growth (annual %)	NY.GDP.PCAP.KD.ZG	Palau	PLW	3.41918	1.02833	3.28809	-4.03728	-5.77349	0.790318	6.96736	3.03739	-2.39339	4.37375	7.86509	-0.591033	-3.34149	0.0987689	0.290093	-5.96773	-13.7503	-1.18507	2.06094	..
GDP per capita growth (annual %)	NY.GDP.PCAP.KD.ZG	Panama	PAN	6.25412	7.8392	11.0969	8.20927	-0.205009	4.19797	9.94036	7.70987	4.48787	2.83088	3.46107	2.7798	3.94788	2.19399	1.4757	-18.9422	15.0695	9.37603	6.00258	1.56739
GDP per capita growth (annual %)	NY.GDP.PCAP.KD.ZG	Papua New Guinea	PNG	2.96267	2.10106	4.47661	-3.3454	3.57849	6.85231	-1.79758	1.78156	1.0575	10.6032	3.89898	2.91791	1.08693	-2.56991	2.14825	-5.20689	-2.47025	3.7363	1.94776	2.25586
GDP per capita growth (annual %)	NY.GDP.PCAP.KD.ZG	Paraguay	PRY	1.01015	3.72098	4.39312	5.46828	-1.27523	9.80315	2.91155	-2.09517	6.74651	3.78558	1.46452	2.76597	3.32963	1.77964	-1.74219	-2.15167	2.76491	-0.954302	3.71542	2.97102
GDP per capita growth (annual %)	NY.GDP.PCAP.KD.ZG	Peru	PER	5.34332	6.68114	7.73406	8.41091	0.473893	7.62774	5.53596	5.25513	4.90271	1.36939	2.09362	2.57623	1.01943	2.10185	0.502286	-11.9891	12.2777	1.82762	-1.49256	2.18017
GDP per capita growth (annual %)	NY.GDP.PCAP.KD.ZG	Philippines	PHL	3.00922	3.55972	4.6875	2.51657	-0.362955	5.15869	1.83761	4.84077	4.76267	4.61514	4.78725	5.72121	5.56223	5.03429	4.83578	-10.5489	4.76164	6.76595	4.6677	4.82301
GDP per capita growth (annual %)	NY.GDP.PCAP.KD.ZG	Poland	POL	3.30621	6.26943	6.81844	4.36954	2.54562	3.46401	5.19888	1.51202	0.745032	3.99832	4.50138	3.07548	5.13934	6.24607	4.60601	-0.861202	8.47172	5.71228	0.616853	3.29687
GDP per capita growth (annual %)	NY.GDP.PCAP.KD.ZG	Portugal	PRT	0.595038	1.44194	2.30555	0.1747	-3.21439	1.69093	-1.56886	-3.66111	-0.439198	1.28605	2.0114	2.32643	3.567	3.11124	2.7213	-8.30107	4.89913	6.24247	1.2178	0.752522
GDP per capita growth (annual %)	NY.GDP.PCAP.KD.ZG	Puerto Rico (US)	PRI	-1.84546	-0.99103	-0.582297	-1.26658	-1.41621	0.0130919	0.477828	0.915047	0.506273	0.0887812	0.346031	0.289082	-0.90368	-0.869549	1.30601	-3.56475	0.966081	4.31831	1.01082	3.24272
GDP per capita growth (annual %)	NY.GDP.PCAP.KD.ZG	Qatar	QAT	0.710909	7.05038	-5.03013	-0.340739	-0.705592	19.0058	12.8219	-1.20908	-5.12875	-6.18524	-3.86137	-2.45101	-4.156	-0.134705	-1.52204	-8.92451	13.3615	-1.79098	1.23672	-4.48803
GDP per capita growth (annual %)	NY.GDP.PCAP.KD.ZG	Romania	ROU	5.31651	8.67068	8.82965	11.1442	-4.72629	-3.33335	5.01083	2.35828	0.651822	4.50673	3.64307	3.4517	8.82267	6.74622	4.47219	-3.1424	6.33606	4.36678	2.34529	0.761555
GDP per capita growth (annual %)	NY.GDP.PCAP.KD.ZG	Russian Federation	RUS	6.80661	8.55494	8.68577	5.24621	-7.82775	4.4531	4.17698	3.76272	1.45315	-1.12194	-2.27621	-0.0904862	1.61387	2.71659	2.14203	-2.5268	6.21858	-1.09717	4.37751	4.55626
GDP per capita growth (annual %)	NY.GDP.PCAP.KD.ZG	Rwanda	RWA	6.5067	6.35267	4.80791	8.27757	3.54292	4.6598	5.34278	6.07173	2.23301	3.63165	6.28259	3.48879	1.50906	6.03178	6.9793	-5.51637	8.45601	5.81773	5.896	6.58327
GDP per capita growth (annual %)	NY.GDP.PCAP.KD.ZG	Samoa	WSM	6.22343	1.73439	-0.0698092	2.81855	-1.27185	5.29452	2.94773	-4.60663	-0.786396	-0.230249	2.95227	7.07276	0.460419	-1.64721	3.35745	-4.09773	-7.87643	-5.95823	8.50197	8.74178
GDP per capita growth (annual %)	NY.GDP.PCAP.KD.ZG	San Marino	SMR	1.12402	2.633	3.58488	-1.91822	-14.1288	-6.05329	-6.48781	-9.40251	0.501233	0.471382	1.53902	1.71366	-1.88769	-0.555259	1.65051	-6.93519	15.6203	9.48711	..	..
GDP per capita growth (annual %)	NY.GDP.PCAP.KD.ZG	Sao Tome and Principe	STP	4.01982	6.23775	1.16067	3.72699	0.944229	-0.755151	-0.11419	0.883421	3.10108	2.97674	-0.246826	3.42223	2.46252	2.78058	0.482132	0.716646	-0.178527	-1.75407	-1.61284	-1.09841
GDP per capita growth (annual %)	NY.GDP.PCAP.KD.ZG	Saudi Arabia	SAU	1.35662	-1.01591	-1.94086	2.04299	-4.86502	6.0872	6.79988	1.40883	-2.47715	1.50657	-0.63481	-2.03437	1.10644	5.89708	2.09951	-8.34345	9.17746	7.15913	-4.01429	-2.79946
GDP per capita growth (annual %)	NY.GDP.PCAP.KD.ZG	Senegal	SEN	1.89855	-0.0239031	0.466183	1.30518	0.349911	0.95227	-1.19544	1.25575	-0.578036	2.91208	3.15104	3.23504	4.35024	3.27616	1.80892	-1.29148	3.87343	1.31913	1.79788	4.44005
GDP per capita growth (annual %)	NY.GDP.PCAP.KD.ZG	Serbia	SRB	6.22214	4.31001	8.27017	5.60952	-2.75344	2.02028	0.813571	0.0402005	0.941379	-1.32559	1.81545	3.51589	2.90962	5.22267	5.31382	-0.288042	8.97258	5.24705	4.4945	4.44542
GDP per capita growth (annual %)	NY.GDP.PCAP.KD.ZG	Seychelles	SYC	8.5019	7.15335	8.32165	-4.87713	-2.86142	1.62737	12.4266	2.10413	-0.599133	2.45761	6.51233	10.6278	5.65299	3.94281	4.58155	-12.4901	-0.254098	-6.67666	2.3489	2.11773
GDP per capita growth (annual %)	NY.GDP.PCAP.KD.ZG	Sierra Leone	SLE	1.58435	2.00713	1.49613	1.12905	-1.1673	3.50022	5.31596	7.813	11.8801	-9.99127	-6.55488	3.96056	0.774679	0.506744	3.08171	-3.50678	3.51528	2.99519	3.41472	1.81567
GDP per capita growth (annual %)	NY.GDP.PCAP.KD.ZG	Singapore	SGP	4.87209	5.64834	4.57299	-3.41549	-2.84677	12.5085	4.02338	1.90446	3.13398	2.59472	1.76232	2.41021	4.38438	2.9672	0.155398	-3.51423	14.4308	0.719822	-3.00716	2.32664
GDP per capita growth (annual %)	NY.GDP.PCAP.KD.ZG	Sint Maarten (Dutch part)	SXM	..	..	..	..	..	2.27469	3.15617	-0.798053	-1.04129	-0.685454	-2.02876	-1.08597	-9.30645	-8.53633	9.11581	-14.6337	3.16129	8.31998	2.31884	2.06509
GDP per capita growth (annual %)	NY.GDP.PCAP.KD.ZG	Slovak Republic	SVK	6.47449	8.92068	10.7863	5.27306	-5.63118	6.69111	2.43027	1.39646	0.595168	2.60833	5.07697	1.81647	2.71522	3.91809	2.13758	-2.66903	5.92429	0.723874	2.26251	2.1496
GDP per capita growth (annual %)	NY.GDP.PCAP.KD.ZG	Slovenia	SVN	3.6744	5.57135	6.54177	3.20889	-8.42209	0.672168	0.446561	-3.11922	-0.958293	2.66181	2.31634	2.95902	5.10589	4.00131	2.78705	-4.72525	8.09864	2.50489	1.7088	1.31089
GDP per capita growth (annual %)	NY.GDP.PCAP.KD.ZG	Solomon Islands	SLB	5.47572	2.33469	1.8655	4.42335	1.00785	6.65634	3.54868	-1.22477	1.46316	-2.4133	-1.90279	1.89526	-0.42623	-0.648776	-0.912851	-5.50313	0.130939	-0.0197029	0.226116	0.136946
GDP per capita growth (annual %)	NY.GDP.PCAP.KD.ZG	Somalia, Fed. Rep.	SOM	3.45522	3.27229	3.42377	3.57943	4.03514	4.0791	5.94203	5.73257	7.43785	5.13915	6.72219	2.99347	10.3677	-1.4847	-0.886143	-6.37474	-0.257094	-0.333978	1.05606	0.414154
GDP per capita growth (annual %)	NY.GDP.PCAP.KD.ZG	South Africa	ZAF	4.21639	4.53032	4.2547	2.00799	-2.70664	1.82805	1.90092	0.89718	0.805659	-0.257189	-0.694265	-0.277781	0.498696	-0.137485	-1.38036	-7.67873	3.35053	0.48062	-0.630051	-0.669087
GDP per capita growth (annual %)	NY.GDP.PCAP.KD.ZG	South Sudan	SSD	..	..	..	..	0.20171	0.0553052	-9.66552	-48.4287	8.97551	2.74064	-9.76929	..	..	..	..	..	..	..	..	..
GDP per capita growth (annual %)	NY.GDP.PCAP.KD.ZG	Spain	ESP	1.81658	2.29952	1.63464	-0.827648	-4.61673	-0.36566	-0.992359	-2.92816	-1.07017	1.83397	4.14701	2.83577	2.64617	1.93406	1.23304	-11.3931	6.49337	5.41877	1.48256	2.17965
GDP per capita growth (annual %)	NY.GDP.PCAP.KD.ZG	Sri Lanka	LKA	5.56425	6.94942	6.06652	5.24733	2.90512	7.38143	7.99727	7.80903	7.00603	5.38987	3.25185	3.8698	5.24983	1.28557	-0.829147	-5.12926	3.09278	-7.45362	-1.69163	5.58848
GDP per capita growth (annual %)	NY.GDP.PCAP.KD.ZG	St. Kitts and Nevis	KNA	9.44453	2.858	0.305516	11.0104	-3.57151	0.0951506	1.52991	-1.04788	5.64642	7.53128	0.698412	3.9592	0.274194	2.09466	3.06102	-15.1537	0.597261	10.47	4.21923	0.982866
GDP per capita growth (annual %)	NY.GDP.PCAP.KD.ZG	St. Lucia	LCA	-1.13924	5.43753	1.0133	4.29653	-3.43583	-0.27875	3.78345	-0.563683	-2.26163	0.880622	-0.337053	2.99154	2.9718	2.49445	-1.06027	-24.6114	11.4287	20.214	1.92255	3.62645
GDP per capita growth (annual %)	NY.GDP.PCAP.KD.ZG	St. Martin (French part)	MAF	..	..	..	..	..	..	..	..	..	..	1.21892	5.54795	-7.15585	-5.89236	11.9234	-5.67034	11.2897	..	..	..
GDP per capita growth (annual %)	NY.GDP.PCAP.KD.ZG	St. Vincent and the Grenadines	VCT	2.83945	7.4134	3.77042	0.859513	-0.914125	-3.99351	-0.0518119	1.73945	3.03196	1.81519	3.33571	4.74427	2.10747	3.90032	1.40194	-3.67619	2.77342	3.91413	6.07793	4.79305
GDP per capita growth (annual %)	NY.GDP.PCAP.KD.ZG	Sudan	SDN	2.75337	3.55588	2.69329	0.693531	-5.81042	0.758886	5.872	-7.20056	-0.372546	1.86453	-1.1481	0.369473	-2.71987	-6.01717	-5.00796	-6.18596	-4.47701	-3.59801	-30.3632	-14.1898
GDP per capita growth (annual %)	NY.GDP.PCAP.KD.ZG	Suriname	SUR	3.41538	4.64815	3.92006	2.93593	1.8154	3.95348	4.64182	1.52881	1.77806	-0.851471	-4.4516	-5.90338	0.547149	3.93295	0.12296	-16.8739	-3.3163	1.54052	1.6066	1.94076
GDP per capita growth (annual %)	NY.GDP.PCAP.KD.ZG	Sweden	SWE	2.38288	4.08887	2.46228	-1.69197	-5.06776	4.85302	2.3878	-1.14844	0.284348	1.28578	3.31187	1.07181	0.46232	0.726063	1.51533	-2.711	5.30316	0.771118	-0.585226	0.657843
GDP per capita growth (annual %)	NY.GDP.PCAP.KD.ZG	Switzerland	CHE	2.09359	3.42255	2.99182	1.50995	-3.51056	2.17364	0.68734	0.110597	0.628361	1.10869	0.49413	0.960132	0.421326	2.10552	0.42309	-2.85416	4.75465	2.19241	-0.574124	-0.334913
GDP per capita growth (annual %)	NY.GDP.PCAP.KD.ZG	Syrian Arab Republic	SYR	3.52095	0.644012	-0.635804	0.843364	4.27155	2.82697	1.07121	-25.956	-22.5828	-4.14664	0.00846504	-5.28022	-0.882509	-0.435919	-2.63689	-3.98011	-0.874333	-3.00435	-5.94893	..
GDP per capita growth (annual %)	NY.GDP.PCAP.KD.ZG	Tajikistan	TJK	4.63259	4.98592	5.74856	5.78379	1.79395	4.24657	5.03036	4.96076	4.75131	4.05543	3.34194	4.22569	4.50305	5.04059	4.89099	2.05117	7.01157	5.71622	6.13628	6.34142
GDP per capita growth (annual %)	NY.GDP.PCAP.KD.ZG	Tanzania	TZA	4.54019	3.59555	3.83493	2.87354	2.70937	3.67041	4.70485	1.53892	3.62723	3.51148	2.77038	3.30401	3.27074	2.20861	2.71006	-0.998988	1.25402	1.543	2.08099	2.55385
GDP per capita growth (annual %)	NY.GDP.PCAP.KD.ZG	Thailand	THA	3.29538	4.10012	4.59499	0.94728	-1.42136	6.7948	0.215046	6.58038	2.08615	0.450537	2.65972	2.96944	3.73798	3.90763	1.90583	-6.20637	1.43062	2.56894	2.06455	2.57521
GDP per capita growth (annual %)	NY.GDP.PCAP.KD.ZG	Timor-Leste	TLS	0.895482	-6.89326	7.16094	8.42335	7.40541	6.72119	3.52214	2.58043	0.985677	2.42106	0.504814	1.0659	-4.99168	-1.90089	21.0418	29.4633	3.43675	-21.6532	-19.0115	-3.33103
GDP per capita growth (annual %)	NY.GDP.PCAP.KD.ZG	Togo	TGO	-7.08238	-0.185446	-4.01252	1.08767	2.50754	3.01287	3.0098	3.54417	3.14133	2.98963	2.84282	1.6276	1.4412	2.23649	2.39019	-0.438937	3.49989	3.30037	3.95369	2.9661
GDP per capita growth (annual %)	NY.GDP.PCAP.KD.ZG	Tonga	TON	-1.22172	-2.70155	-2.89658	4.57477	-5.29113	0.639458	6.53507	1.02307	0.752077	2.43922	1.60361	7.17551	3.36689	0.486299	-0.30476	1.74969	0.566203	-1.89322	2.51847	..
GDP per capita growth (annual %)	NY.GDP.PCAP.KD.ZG	Trinidad and Tobago	TTO	10.384	12.9071	4.33268	2.96516	-4.50258	2.72667	-1.06804	6.13665	2.93117	3.32647	-0.883383	-7.69262	-5.01069	-1.17202	0.118832	-9.08543	-0.972349	1.21196	1.30065	1.58946
GDP per capita growth (annual %)	NY.GDP.PCAP.KD.ZG	Tunisia	TUN	2.58534	4.31907	5.73568	3.23983	1.99812	1.86836	-3.1269	3.04657	1.219	1.87486	-0.165532	0.00869013	1.16878	1.6217	0.650533	-9.76403	4.08814	2.07426	-0.62581	0.717656
GDP per capita growth (annual %)	NY.GDP.PCAP.KD.ZG	Turkiye	TUR	7.83377	5.85509	4.87467	-0.452854	-6.12786	6.79208	9.57986	3.46121	7.10132	3.53349	4.6786	1.94226	6.11696	1.62818	-0.61263	0.876219	10.4294	4.49946	4.68487	2.95152
GDP per capita growth (annual %)	NY.GDP.PCAP.KD.ZG	Turkmenistan	TKM	10.9273	8.92835	9.00627	12.533	4.02605	6.98702	12.2972	8.70666	7.7732	7.8319	4.09292	3.79096	4.09375	3.83102	3.98119	3.6758	4.07166	4.1708	4.36243	0.489419
GDP per capita growth (annual %)	NY.GDP.PCAP.KD.ZG	Turks and Caicos Islands	TCA	..	..	..	3.70447	-22.8174	-2.92353	0.865883	-6.54753	-3.51219	4.37835	6.58612	2.46456	-6.39423	83.5668	1.07341	-35.6362	27.1739	12.5841	12.867	4.87182
GDP per capita growth (annual %)	NY.GDP.PCAP.KD.ZG	Tuvalu	TUV	-5.84063	1.25735	5.81699	5.23011	-7.50466	-3.63168	5.1733	-3.50614	3.71231	0.154771	10.6282	5.97939	3.02336	2.50008	15.6508	-2.59958	3.8514	2.71262	5.71488	..
GDP per capita growth (annual %)	NY.GDP.PCAP.KD.ZG	Uganda	UGA	3.25714	7.58858	5.27038	5.5545	3.70592	2.57308	6.23091	0.865151	0.656669	2.04948	2.0043	1.35743	-0.406391	2.753	2.88959	-0.423923	0.258076	1.48927	2.42759	3.25361
GDP per capita growth (annual %)	NY.GDP.PCAP.KD.ZG	Ukraine	UKR	3.92453	8.26961	8.71227	2.77551	-14.7807	4.46783	5.78262	0.364276	0.226083	-5.08847	-9.27687	2.94151	2.86028	4.09938	3.87285	-3.08459	4.41051	-22.7457	15.448	2.53118
GDP per capita growth (annual %)	NY.GDP.PCAP.KD.ZG	United Arab Emirates	ARE	-0.445688	2.28744	-8.10765	-7.90935	-10.9562	-0.804617	2.70725	-2.12799	0.937161	-0.570028	1.18961	0.483039	-2.41186	-0.0245088	0.047746	-4.50467	2.45717	2.17608	-0.421511	0.0103742
GDP per capita growth (annual %)	NY.GDP.PCAP.KD.ZG	United Kingdom	GBR	2.0297	1.63091	1.82888	-1.03079	-5.33927	1.43505	0.35104	0.788536	1.12061	2.42651	1.48788	1.11543	2.09783	0.911083	1.10286	-10.4488	8.18693	3.8776	-0.904568	0.0287023
GDP per capita growth (annual %)	NY.GDP.PCAP.KD.ZG	United States	USA	2.53411	1.7982	1.03834	-0.828888	-3.42683	1.82992	0.762796	1.47571	1.34816	1.71095	2.12741	1.02267	1.75014	2.36444	2.05677	-2.56181	5.88834	1.92386	2.0356	1.79735
GDP per capita growth (annual %)	NY.GDP.PCAP.KD.ZG	Uruguay	URY	7.37435	3.98038	6.35893	6.94817	3.99426	7.52765	4.90151	3.27196	4.32675	2.90053	0.0225746	1.35078	1.46549	-0.0151011	0.848968	-7.40535	5.9151	4.66439	0.826336	3.15371
GDP per capita growth (annual %)	NY.GDP.PCAP.KD.ZG	Uzbekistan	UZB	5.62059	6.07475	7.94887	7.36857	6.33169	5.9059	5.89233	5.49672	5.62826	5.10954	5.38346	4.11984	2.64128	3.75177	4.86486	-0.316556	5.96091	3.892	4.16468	4.4218
GDP per capita growth (annual %)	NY.GDP.PCAP.KD.ZG	Vanuatu	VUT	2.78262	5.86726	0.387169	2.98535	0.453966	-1.08594	0.925979	-1.18521	-1.74696	0.305493	1.67602	1.19514	2.0058	0.464611	0.862983	-7.17743	-3.80856	2.77436	-3.24062	1.63021
GDP per capita growth (annual %)	NY.GDP.PCAP.KD.ZG	Venezuela, RB	VEN	8.48531	8.10093	7.08319	3.7605	-4.5114	-2.77023	2.84818	4.30852	0.128923	-4.98041	..	..	..	..	..	..	..	..	..	..
GDP per capita growth (annual %)	NY.GDP.PCAP.KD.ZG	Viet Nam	VNM	6.5534	5.5724	5.25231	3.74839	3.83237	5.21228	5.1945	4.27631	4.31499	5.13784	5.66896	5.35427	5.61788	6.28096	6.32465	1.91581	1.66652	7.7257	4.36195	6.41729
GDP per capita growth (annual %)	NY.GDP.PCAP.KD.ZG	Virgin Islands (U.S.)	VIR	3.49771	3.58522	4.04132	1.1626	-6.60082	0.640017	-8.14745	-14.7322	-6.15765	-1.62976	-0.267922	1.78607	-0.517854	2.1449	3.22863	-1.26412	4.07887	-0.883384	..	..
GDP per capita growth (annual %)	NY.GDP.PCAP.KD.ZG	West Bank and Gaza	PSE	8.48291	-3.4943	1.16983	4.51371	5.73458	3.06565	6.86783	3.51037	2.21485	-2.47103	1.37259	6.44666	-0.577623	-1.30481	-1.15161	-13.4964	4.4147	1.58856	-6.81292	-28.2707
GDP per capita growth (annual %)	NY.GDP.PCAP.KD.ZG	Yemen, Rep.	YEM	2.37203	-0.129376	0.0451099	0.370979	0.59821	4.3745	-15.3367	-0.670663	1.67911	-3.20472	-30.1508	-12.0554	-7.88861	-2.18649	..	..	..	..	..	..
GDP per capita growth (annual %)	NY.GDP.PCAP.KD.ZG	Zambia	ZMB	3.75264	4.24983	4.59672	3.99773	5.42272	6.54512	2.11651	4.16439	1.74618	1.42432	-0.241301	0.59398	0.398378	0.953734	-1.51895	-5.56774	3.28575	2.34336	2.46464	1.15839
GDP per capita growth (annual %)	NY.GDP.PCAP.KD.ZG	Zimbabwe	ZWE	-6.59885	-4.63047	-4.91456	-18.6543	11.6894	17.7601	12.1875	14.7872	0.563615	0.982274	0.425142	-0.633235	3.2341	3.45955	-7.78558	-9.33395	6.61193	4.34358	3.5849	0.228944
GDP per capita growth (annual %)	NY.GDP.PCAP.KD.ZG	Africa Eastern and Southern	AFE	3.37737	3.76972	3.81487	1.56198	-1.83157	2.36998	1.3025	-0.936577	1.48985	1.23938	0.262663	-0.467421	0.0184642	-0.104064	-0.543715	-5.44702	1.8296	0.90533	-0.645084	0.256613
GDP per capita growth (annual %)	NY.GDP.PCAP.KD.ZG	Africa Western and Central	AFW	2.94694	2.41944	2.5667	3.31474	3.2031	4.09024	2.02559	2.25663	3.17141	2.86522	0.186777	-2.44845	-0.35546	0.330192	0.792526	-3.32174	1.59975	1.57805	0.920848	1.70719
GDP per capita growth (annual %)	NY.GDP.PCAP.KD.ZG	Arab World	ARB	3.09465	3.74283	2.00083	2.91583	-1.81477	2.76677	1.4189	2.6227	0.0535821	0.211864	0.786179	1.17701	-0.413329	0.834305	-0.169697	-6.73914	2.83541	4.56531	-0.759813	-0.610338
GDP per capita growth (annual %)	NY.GDP.PCAP.KD.ZG	Caribbean small states	CSS	5.20348	7.23516	3.21154	1.0674	-3.88374	1.24928	0.18768	3.72916	0.773775	1.87104	-0.770912	-3.63155	-1.35139	0.277509	0.11335	-9.44278	6.00684	14.5542	8.46305	12.866
GDP per capita growth (annual %)	NY.GDP.PCAP.KD.ZG	Central Europe and the Baltics	CEB	5.19655	6.9128	6.73616	4.3352	-3.43713	1.90713	3.84723	1.0745	1.01757	3.55155	4.31216	3.13279	5.42585	5.33514	4.24109	-2.69589	7.62002	4.17583	0.65868	2.0915
GDP per capita growth (annual %)	NY.GDP.PCAP.KD.ZG	Early-demographic dividend	EAR	4.12967	4.32413	4.00251	1.81655	-0.849023	4.86895	3.36282	2.66199	2.56863	2.70731	2.98946	3.02451	3.33761	2.58204	1.143	-5.37272	6.37959	4.78115	3.39062	2.39652
GDP per capita growth (annual %)	NY.GDP.PCAP.KD.ZG	East Asia & Pacific	EAS	5.17305	5.68716	6.67442	3.65032	1.89203	6.86652	4.69183	4.35133	4.43827	4.00868	3.97109	3.9133	4.31134	4.15492	3.50605	-0.46192	6.08428	2.79555	3.98285	3.72498
GDP per capita growth (annual %)	NY.GDP.PCAP.KD.ZG	East Asia & Pacific (excluding high income)	EAP	9.1697	10.1912	11.5667	7.80387	7.20487	9.08582	7.73842	6.64306	6.40104	6.15575	5.84867	5.71644	5.86168	5.85455	5.30475	0.887898	7.38137	3.30239	5.05942	4.78639
GDP per capita growth (annual %)	NY.GDP.PCAP.KD.ZG	East Asia & Pacific (IDA & IBRD countries)	TEA	9.16615	10.1868	11.5618	7.79923	7.20023	9.08122	7.73369	6.63729	6.3955	6.15127	5.84495	5.71272	5.85751	5.85169	5.30283	0.886859	7.38176	3.30403	5.06137	4.78819
GDP per capita growth (annual %)	NY.GDP.PCAP.KD.ZG	Euro area	EMU	1.23619	2.82826	2.46686	-0.0857576	-4.80814	1.86201	1.96823	-1.13085	-0.327215	1.27739	1.85771	1.54064	2.396	1.46024	1.4422	-6.17894	6.29073	3.09962	-0.0376377	0.623989
GDP per capita growth (annual %)	NY.GDP.PCAP.KD.ZG	Europe & Central Asia	ECS	2.41836	3.60187	3.35205	0.591063	-4.81194	2.25131	2.14512	-0.0855114	0.486996	1.52725	1.64802	1.42509	2.47695	1.71778	1.49558	-5.58758	6.68224	3.26115	1.00617	1.20691
GDP per capita growth (annual %)	NY.GDP.PCAP.KD.ZG	Europe & Central Asia (excluding high income)	ECA	8.00785	7.67306	6.86516	2.36141	-4.18883	6.19709	7.55037	3.18972	5.57499	2.43677	2.65624	1.85831	4.90047	2.60563	1.40046	-0.424214	8.38363	3.66042	5.82984	3.15852
GDP per capita growth (annual %)	NY.GDP.PCAP.KD.ZG	Europe & Central Asia (IDA & IBRD countries)	TEC	6.56498	7.75113	7.6241	4.22081	-5.02848	4.27612	5.44388	2.95433	2.83031	1.81141	0.980686	1.34908	3.80741	3.288	2.25054	-1.65991	7.41688	2.42442	4.37028	3.44272
GDP per capita growth (annual %)	NY.GDP.PCAP.KD.ZG	European Union	EUU	1.61035	3.21567	2.78199	0.286209	-4.55449	2.02278	2.11694	-0.908994	-0.116089	1.51576	2.16924	1.74358	2.64539	1.82337	1.74481	-5.56509	6.51054	3.15094	0.0704761	0.854945
GDP per capita growth (annual %)	NY.GDP.PCAP.KD.ZG	Fragile and conflict affected situations	FCS	3.33785	3.28167	3.52099	2.54837	0.488536	4.42617	-2.35458	3.05098	1.02017	-0.00788853	-1.3965	-0.0818529	0.323254	0.523241	0.0862238	-7.11051	0.223557	-0.663209	-0.0293639	-0.670309
GDP per capita growth (annual %)	NY.GDP.PCAP.KD.ZG	Heavily indebted poor countries (HIPC)	HPC	2.70276	2.85211	2.56925	2.7435	0.707448	3.28037	1.71266	1.13173	2.76727	2.63296	1.97843	1.48872	1.99548	1.29325	1.60134	-2.49123	1.46666	2.2935	0.841679	2.54858
GDP per capita growth (annual %)	NY.GDP.PCAP.KD.ZG	High income	HIC	2.44061	2.63181	2.17946	-0.0214219	-3.94499	2.57867	1.59637	0.863881	1.03109	1.59962	1.70548	1.21354	2.02405	2.01501	1.57078	-4.1305	5.96889	2.51051	1.08162	1.27234
GDP per capita growth (annual %)	NY.GDP.PCAP.KD.ZG	IBRD only	IBD	6.07184	7.1754	7.86439	4.86489	1.77392	6.72578	5.26656	4.32035	4.09222	3.7411	3.35479	3.55346	4.25278	4.05924	3.2204	-1.92203	7.03346	3.25177	4.31184	3.74477
GDP per capita growth (annual %)	NY.GDP.PCAP.KD.ZG	IDA & IBRD total	IBT	5.67287	6.656	7.26135	4.45277	1.62537	6.25241	4.76778	3.86452	3.83721	3.51515	2.99362	3.14516	3.82936	3.65725	2.83409	-2.29059	6.32869	2.83465	3.71193	3.28887
GDP per capita growth (annual %)	NY.GDP.PCAP.KD.ZG	IDA blend	IDB	3.36413	3.12519	2.71521	1.47822	3.18337	3.27296	1.68538	2.15306	3.44767	3.57019	1.75617	0.289531	0.757645	1.8071	0.996578	-3.37331	3.16388	2.33227	0.804069	1.94337
GDP per capita growth (annual %)	NY.GDP.PCAP.KD.ZG	IDA only	IDX	4.06287	3.97667	4.00206	3.57353	1.94353	4.09849	1.93709	0.103975	2.69297	2.90681	0.862139	2.00043	2.86748	2.49043	2.56302	-2.59915	1.35964	2.12008	0.989229	2.25724
GDP per capita growth (annual %)	NY.GDP.PCAP.KD.ZG	IDA total	IDA	3.73383	3.56284	3.39024	2.56361	2.61279	3.7344	1.84158	1.13797	3.08623	3.23942	1.29999	1.08962	1.76171	2.10925	1.73688	-3.0226	2.20744	2.191	0.851336	2.05249
GDP per capita growth (annual %)	NY.GDP.PCAP.KD.ZG	Late-demographic dividend	LTE	7.12191	8.59807	9.49191	6.26313	3.10162	7.42735	6.494	5.0522	4.89749	4.52216	4.00309	3.769	4.60806	4.86508	4.26872	-0.0122857	7.40136	3.13947	4.24086	4.35193
GDP per capita growth (annual %)	NY.GDP.PCAP.KD.ZG	Latin America & Caribbean	LCN	2.69056	3.89666	3.97004	2.46241	-3.36786	5.23652	3.28977	1.48623	1.69499	0.313288	-0.573257	-1.27308	0.965071	0.732309	-0.131553	-7.27383	6.46573	3.35286	1.55134	1.55975
GDP per capita growth (annual %)	NY.GDP.PCAP.KD.ZG	Latin America & Caribbean (excluding high income)	LAC	2.7311	3.98742	4.0787	2.54011	-3.51714	5.52776	3.30577	1.2557	1.70096	0.24117	-0.732052	-1.49991	0.976208	0.523271	-0.382706	-7.2965	6.17382	3.18417	1.45393	1.27915
GDP per capita growth (annual %)	NY.GDP.PCAP.KD.ZG	Latin America & the Caribbean (IDA & IBRD countries)	TLA	2.75483	3.9714	4.10159	2.59421	-3.44607	5.49168	3.42801	1.52329	1.75432	0.339135	-0.64838	-1.30748	1.02681	0.775305	-0.157612	-7.20904	6.63497	3.35209	1.61215	1.51626
GDP per capita growth (annual %)	NY.GDP.PCAP.KD.ZG	Least developed countries: UN classification	LDC	4.95921	4.32502	4.79231	4.01228	1.80297	3.83185	0.92317	0.782465	3.27317	3.01145	0.435552	1.32067	2.10323	2.20118	2.62812	-2.46204	0.453846	2.42664	0.722847	1.50699
GDP per capita growth (annual %)	NY.GDP.PCAP.KD.ZG	Low & middle income	LMY	5.84765	6.70192	7.34935	4.48726	2.59218	6.68146	4.90734	4.02818	4.1902	3.7976	3.36608	3.41662	3.99067	3.72102	2.90354	-2.16019	6.32936	2.99626	3.8348	3.3082
GDP per capita growth (annual %)	NY.GDP.PCAP.KD.ZG	Low income	LIC	3.24894	2.31274	2.4852	2.04513	0.543544	3.52861	-2.915	-7.08555	-0.153894	0.612419	-4.47583	-1.88527	-0.929254	-0.0703771	0.521037	-3.80859	-1.44561	0.937505	-2.87762	-0.425782
GDP per capita growth (annual %)	NY.GDP.PCAP.KD.ZG	Lower middle income	LMC	4.79893	5.08332	5.0036	2.77956	4.14636	5.03255	2.99905	3.44588	3.99266	4.44005	4.32666	4.12241	3.92237	3.95136	2.6473	-4.89357	5.31532	4.83356	4.68701	3.81907
GDP per capita growth (annual %)	NY.GDP.PCAP.KD.ZG	Middle East, North Africa, Afghanistan & Pakistan	MEA	2.80381	3.4454	2.73545	1.92155	-1.25375	2.67702	1.48358	1.70234	0.246719	1.06535	0.727448	2.59439	0.556937	0.998724	-0.201809	-5.05794	3.55523	4.36902	0.17521	0.0215155
GDP per capita growth (annual %)	NY.GDP.PCAP.KD.ZG	Middle East, North Africa, Afghanistan & Pakistan (excluding high income)	MNA	2.59262	3.02658	3.53232	1.24608	0.582076	2.58676	-2.44523	1.50391	-0.792879	0.525218	-0.604846	3.85305	1.61996	0.762136	-0.572333	-4.54983	2.6995	2.42715	1.06551	0.231804
GDP per capita growth (annual %)	NY.GDP.PCAP.KD.ZG	Middle East, North Africa, Afghanistan & Pakistan (IDA & IBRD)	TMN	2.55566	3.06999	3.54721	1.22619	0.549259	2.58347	-2.50868	1.48848	-0.816468	0.548418	-0.620743	3.83169	1.63752	0.777894	-0.56846	-4.47921	2.68685	2.43313	1.1239	0.428601
GDP per capita growth (annual %)	NY.GDP.PCAP.KD.ZG	Middle income	MIC	5.98493	6.88418	7.54074	4.62756	2.72574	6.84002	5.14955	4.3118	4.34169	3.92751	3.57148	3.59482	4.17313	3.90046	3.07644	-1.99847	6.58226	3.17647	4.08078	3.51795
GDP per capita growth (annual %)	NY.GDP.PCAP.KD.ZG	North America	NAC	2.50962	1.78328	1.04071	-0.774887	-3.48014	1.83185	0.865491	1.40177	1.33392	1.71568	1.94842	0.926338	1.7438	2.25848	1.90533	-2.85284	5.83672	1.92081	1.7108	1.48591
GDP per capita growth (annual %)	NY.GDP.PCAP.KD.ZG	Not classified	INX	..	..	..	..	..	..	..	..	..	..	..	..	..	..	..	..	..	..	..	..
GDP per capita growth (annual %)	NY.GDP.PCAP.KD.ZG	OECD members	OED	2.11476	2.3022	1.86536	-0.406772	-4.08348	2.25908	1.35145	0.743176	1.02288	1.56285	1.88509	1.19989	1.96344	1.70844	1.28426	-4.2652	5.76525	2.50905	1.13579	1.16943
GDP per capita growth (annual %)	NY.GDP.PCAP.KD.ZG	Other small states	OSS	3.35991	5.10086	4.1334	-0.270463	-6.10107	1.26649	2.33541	0.165001	-0.116361	0.941557	2.33447	3.01692	3.95948	3.16344	3.09206	-6.82459	6.67007	3.32558	1.53934	1.92756
GDP per capita growth (annual %)	NY.GDP.PCAP.KD.ZG	Pacific island small states	PSS	1.27319	1.21076	-0.94657	0.937025	-1.53493	2.51426	2.43447	-0.320199	1.88046	2.21973	2.66301	2.31798	2.53896	1.474	0.104261	-11.0809	-3.79971	8.11668	3.75856	2.73153
GDP per capita growth (annual %)	NY.GDP.PCAP.KD.ZG	Post-demographic dividend	PST	2.27066	2.38182	1.9328	-0.259105	-3.87634	2.4053	1.37385	0.793243	1.12208	1.58487	1.78414	1.32504	2.05443	1.85756	1.51394	-4.26069	5.71857	2.61434	1.50074	1.20281
GDP per capita growth (annual %)	NY.GDP.PCAP.KD.ZG	Pre-demographic dividend	PRE	2.94846	3.20983	3.19895	3.37013	1.75664	3.51759	1.32107	1.19741	2.77565	2.23657	0.212569	-0.406014	-1.14873	-0.171491	0.579379	-5.10438	0.535953	1.69496	-0.278111	0.51488
GDP per capita growth (annual %)	NY.GDP.PCAP.KD.ZG	Small states	SST	3.69562	5.56634	3.55879	0.18596	-5.21276	1.26517	1.56536	1.2414	0.213187	1.24764	1.26314	0.784324	2.207	2.20793	2.07865	-7.79395	5.96719	6.56286	3.61959	5.25067
GDP per capita growth (annual %)	NY.GDP.PCAP.KD.ZG	South Asia	SAS	5.97128	6.29308	6.00207	2.0751	5.93398	6.72706	4.05367	4.2793	4.95217	5.96283	6.46174	6.73734	5.60197	5.27934	3.04101	-5.90537	8.33028	6.24174	7.55417	5.28734
GDP per capita growth (annual %)	NY.GDP.PCAP.KD.ZG	South Asia (IDA & IBRD)	TSA	5.97128	6.29308	6.00207	2.0751	5.93398	6.72706	4.05367	4.2793	4.95217	5.96283	6.46174	6.73734	5.60197	5.27934	3.04101	-5.90537	8.33028	6.24174	7.55417	5.28734
GDP per capita growth (annual %)	NY.GDP.PCAP.KD.ZG	Sub-Saharan Africa	SSF	3.19469	3.18358	3.2758	2.32219	0.332194	3.13213	1.63075	0.49878	2.25613	1.98923	0.227572	-1.38523	-0.154037	0.0845982	0.053948	-4.48421	1.70511	1.20193	0.0757345	0.932461
GDP per capita growth (annual %)	NY.GDP.PCAP.KD.ZG	Sub-Saharan Africa (excluding high income)	SSA	3.09485	3.0953	3.16852	2.20482	0.199261	2.96387	1.4423	0.340694	2.07748	1.79792	-0.0484208	-1.70776	-0.447079	-0.096235	-0.207672	-4.86239	1.65237	1.12414	-0.134027	0.721303
GDP per capita growth (annual %)	NY.GDP.PCAP.KD.ZG	Sub-Saharan Africa (IDA & IBRD countries)	TSS	3.19469	3.18358	3.2758	2.32219	0.332194	3.13213	1.63075	0.49878	2.25613	1.98923	0.227572	-1.38523	-0.154037	0.0845982	0.053948	-4.48421	1.70511	1.20193	0.0757345	0.932461
GDP per capita growth (annual %)	NY.GDP.PCAP.KD.ZG	Upper middle income	UMC	6.65066	7.72728	8.61043	5.46368	2.70358	7.67375	6.04321	4.82311	4.70184	4.0866	3.65588	3.73503	4.50194	4.15565	3.47177	-0.932309	7.26913	3.16289	4.36127	3.83323
GDP per capita growth (annual %)	NY.GDP.PCAP.KD.ZG	World	WLD	2.72431	3.15144	3.07757	0.788424	-2.54766	3.26293	2.09536	1.42148	1.62872	1.91136	1.91988	1.62304	2.29224	2.18572	1.64295	-3.79858	5.53567	2.4604	1.99142	1.88947
Inflation, consumer prices (annual %)	FP.CPI.TOTL.ZG	Afghanistan	AFG	..	6.7846	8.68057	26.4187	-6.81116	2.17854	11.8042	6.44121	7.38577	4.674	-0.661709	4.38389	4.97595	0.626149	2.30237	5.60189	5.1332	13.7121	-4.64471	-6.60119
Inflation, consumer prices (annual %)	FP.CPI.TOTL.ZG	Albania	ALB	..	..	..	3.32087	2.26692	3.62605	3.42912	2.03159	1.93762	1.62587	1.89617	1.27543	1.98666	2.02806	1.41109	1.62089	2.04147	6.7252	4.75976	2.21449
Inflation, consumer prices (annual %)	FP.CPI.TOTL.ZG	Algeria	DZA	..	2.3115	3.679	4.85859	5.73706	3.91106	4.52421	8.89145	3.25424	2.91693	4.78445	6.39769	5.59112	4.26999	1.95177	2.41513	7.22606	9.26552	9.32217	4.04611
Inflation, consumer prices (annual %)	FP.CPI.TOTL.ZG	American Samoa	ASM	..	..	..	..	..	..	..	..	..	..	..	..	..	..	..	..	..	..	..	..
Inflation, consumer prices (annual %)	FP.CPI.TOTL.ZG	Andorra	AND	..	..	..	..	..	..	..	..	..	..	..	..	..	..	..	..	..	..	..	..
Inflation, consumer prices (annual %)	FP.CPI.TOTL.ZG	Angola	AGO	22.9535	13.3052	12.2515	12.4758	13.7303	14.4697	13.4825	10.2779	8.77781	7.28039	9.35597	30.6944	29.8445	19.6289	17.081	22.2715	25.7543	21.3553	13.6441	28.2405
Inflation, consumer prices (annual %)	FP.CPI.TOTL.ZG	Antigua and Barbuda	ATG	2.09875	1.78779	1.41605	5.33381	-0.55016	3.37003	3.45675	3.37688	1.0595	1.08944	0.968993	-0.489438	2.43249	1.20716	1.43136	0.62599	2.063	7.53108	5.06714	6.19887
Inflation, consumer prices (annual %)	FP.CPI.TOTL.ZG	Argentina	ARG	..	..	..	..	..	..	..	..	..	..	..	..	..	34.2772	53.5483	42.0151	48.4094	72.4308	133.489	219.884
Inflation, consumer prices (annual %)	FP.CPI.TOTL.ZG	Armenia	ARM	..	..	..	..	..	..	7.65001	2.55802	5.78967	2.98131	3.73169	-1.40361	0.969553	2.52023	1.44345	1.21144	7.18484	8.64091	1.98042	0.269512
Inflation, consumer prices (annual %)	FP.CPI.TOTL.ZG	Aruba	ABW	3.39779	3.60802	5.39257	8.95599	-2.13543	2.07814	4.3163	0.627472	-2.37207	0.421441	0.474764	-0.931196	-1.02828	3.62604	4.25746	..	..	..	..	..
Inflation, consumer prices (annual %)	FP.CPI.TOTL.ZG	Australia	AUS	2.69183	3.55529	2.32761	4.3503	1.77112	2.91834	3.30385	1.76278	2.44989	2.48792	1.50837	1.27699	1.94865	1.9114	1.61077	0.846906	2.86391	6.5941	5.59701	3.16161
Inflation, consumer prices (annual %)	FP.CPI.TOTL.ZG	Austria	AUT	2.29914	1.44155	2.16856	3.21595	0.506309	1.81353	3.28658	2.48568	2.00016	1.60581	0.896563	0.891592	2.08127	1.99838	1.5309	1.38191	2.76667	8.54687	7.81413	2.93792
Inflation, consumer prices (annual %)	FP.CPI.TOTL.ZG	Azerbaijan	AZE	..	8.32892	16.6998	20.8491	1.45705	5.72687	7.85833	1.06621	2.41572	1.37344	4.02769	12.4434	12.9359	2.26855	2.61057	2.75981	6.6503	13.8523	8.78543	2.21217
Inflation, consumer prices (annual %)	FP.CPI.TOTL.ZG	Bahamas, The	BHS	..	..	..	..	..	..	3.19878	1.97337	0.722415	1.51376	1.86148	-0.346377	1.51821	2.26586	2.49124	0.0385211	2.90491	5.60541	3.05292	0.409162
Inflation, consumer prices (annual %)	FP.CPI.TOTL.ZG	Bahrain	BHR	..	..	..	..	..	..	-0.400041	2.7574	3.30001	2.64755	1.84863	2.78679	1.38672	2.08767	1.00582	-2.31771	-0.606319	3.62574	0.0746207	0.919635
Inflation, consumer prices (annual %)	FP.CPI.TOTL.ZG	Bangladesh	BGD	..	..	..	..	..	..	11.3952	6.2175	7.53041	6.99164	6.19428	5.51353	5.70207	5.54362	5.592	5.69107	5.54565	7.69695	9.8835	10.4657
Inflation, consumer prices (annual %)	FP.CPI.TOTL.ZG	Barbados	BRB	..	..	..	..	..	..	9.4322	4.53335	1.8141	1.7695	-1.11279	1.28193	4.66018	3.67381	4.10029	..	..	..	9.79207	-0.462229
Inflation, consumer prices (annual %)	FP.CPI.TOTL.ZG	Belarus	BLR	..	6.99713	8.42675	14.8379	12.9457	7.73575	53.2287	59.2197	18.3123	18.1196	13.5345	11.8366	6.03184	4.8723	5.59816	5.54814	9.46028	15.2097	5.0006	5.78532
Inflation, consumer prices (annual %)	FP.CPI.TOTL.ZG	Belgium	BEL	2.78143	1.79121	1.82306	4.48944	-0.0531457	2.1893	3.53208	2.83966	1.1131	0.340003	0.561429	1.97385	2.12597	2.05316	1.43682	0.740792	2.44025	9.59751	4.04901	3.14349
Inflation, consumer prices (annual %)	FP.CPI.TOTL.ZG	Belize	BLZ	..	..	..	..	..	..	..	1.30058	0.509748	1.2014	-0.861584	0.663427	1.14765	0.269983	0.187069	0.121435	3.23564	6.27689	4.38984	3.28956
Inflation, consumer prices (annual %)	FP.CPI.TOTL.ZG	Benin	BEN	..	..	..	..	0.896072	2.20784	2.70424	6.74468	0.428889	-0.548758	0.218786	-0.79331	0.0432649	0.919171	0.732849	3.02272	1.73354	1.35078	2.7387	1.16093
Inflation, consumer prices (annual %)	FP.CPI.TOTL.ZG	Bermuda	BMU	..	..	..	..	..	..	..	..	..	..	..	..	..	..	..	..	..	..	..	..
Inflation, consumer prices (annual %)	FP.CPI.TOTL.ZG	Bhutan	BTN	..	..	..	..	..	..	..	..	..	8.27106	4.54814	3.21989	4.95508	2.72396	2.72643	5.62937	7.34681	5.63917	4.22934	2.76132
Inflation, consumer prices (annual %)	FP.CPI.TOTL.ZG	Bolivia	BOL	..	4.2824	8.70561	14.0068	3.34645	2.50328	9.88446	4.5156	5.7364	5.7666	4.05961	3.62321	2.82276	2.27206	1.83955	0.940742	0.737384	1.74633	2.57689	5.09977
Inflation, consumer prices (annual %)	FP.CPI.TOTL.ZG	Bosnia and Herzegovina	BIH	..	6.12557	1.50078	7.42704	-0.381464	1.99621	3.67125	2.05267	-0.0930457	-0.897194	-1.03602	-1.5841	0.810133	1.41711	0.562782	-1.0513	1.98164	14.0208	6.1059	1.69213
Inflation, consumer prices (annual %)	FP.CPI.TOTL.ZG	Botswana	BWA	..	..	..	..	..	..	8.45987	7.5369	5.88461	4.40225	3.06203	2.81496	3.30828	3.23802	2.77286	1.89036	7.24098	11.6656	5.06762	2.81835
Inflation, consumer prices (annual %)	FP.CPI.TOTL.ZG	Brazil	BRA	6.86954	4.18357	3.64127	5.67859	4.88803	5.03873	6.63645	5.4035	6.20431	6.32904	9.0299	8.73914	3.44637	3.66485	3.73298	3.21177	8.30166	9.28011	4.59356	4.36746
Inflation, consumer prices (annual %)	FP.CPI.TOTL.ZG	British Virgin Islands	VGB	..	..	..	..	..	..	..	..	..	..	..	..	..	..	..	..	..	..	..	..
Inflation, consumer prices (annual %)	FP.CPI.TOTL.ZG	Brunei Darussalam	BRN	..	..	..	..	..	..	0.137912	0.111766	0.389205	-0.207109	-0.488347	-0.278693	-1.26051	1.02505	-0.390522	1.94032	1.73341	3.68225	0.357064	-0.388674
Inflation, consumer prices (annual %)	FP.CPI.TOTL.ZG	Bulgaria	BGR	5.03884	7.26159	8.40253	12.3487	2.7532	2.43899	4.2199	2.95457	0.890094	-1.41818	-0.104633	-0.79865	2.0616	2.81454	3.10373	1.67244	3.29774	15.3253	9.44284	2.44652
Inflation, consumer prices (annual %)	FP.CPI.TOTL.ZG	Burkina Faso	BFA	..	..	..	..	..	..	2.75977	3.81815	0.533739	-0.25809	0.724839	0.441041	1.483	1.95594	-3.23339	1.8847	3.65327	..	..	4.19082
Inflation, consumer prices (annual %)	FP.CPI.TOTL.ZG	Burundi	BDI	13.2521	2.74542	8.41206	24.407	10.5554	6.49327	9.59217	18.161	7.93796	4.40535	5.54469	5.55769	16.0525	-2.8147	-0.686772	7.32111	8.40454	18.8009	26.9415	20.2125
Inflation, consumer prices (annual %)	FP.CPI.TOTL.ZG	Cabo Verde	CPV	..	..	4.411	6.77444	0.991103	2.07866	4.47388	2.5404	1.50654	-0.238778	0.131188	-1.40782	0.784415	1.257	1.10667	0.605796	1.86215	7.93093	3.72438	1.04817
Inflation, consumer prices (annual %)	FP.CPI.TOTL.ZG	Cambodia	KHM	6.61526	5.81069	8.70883	24.0969	-1.24172	3.9964	5.47845	2.93432	2.94163	3.85569	1.22393	3.01914	2.91264	2.45909	1.94258	2.9403	2.92073	5.3437	2.12747	..
Inflation, consumer prices (annual %)	FP.CPI.TOTL.ZG	Cameroon	CMR	..	..	..	..	..	..	2.9397	2.7353	2.05035	1.8549	2.67624	0.87419	0.640409	1.06886	2.4528	2.43761	2.27186	6.24768	7.38281	4.53061
Inflation, consumer prices (annual %)	FP.CPI.TOTL.ZG	Canada	CAN	2.21355	2.00203	2.13838	2.37027	0.299467	1.77687	2.91214	1.51568	0.938292	1.90664	1.12524	1.42876	1.59688	2.26823	1.94927	0.717	3.39519	6.8028	3.879	2.38158
Inflation, consumer prices (annual %)	FP.CPI.TOTL.ZG	Cayman Islands	CYM	..	..	..	..	..	0.276141	1.32544	1.18895	2.16061	1.27398	-2.34753	-0.625258	..	..	..	..	..	..	..	..
Inflation, consumer prices (annual %)	FP.CPI.TOTL.ZG	Central African Republic	CAF	..	..	0.959918	9.25895	3.52126	1.49102	1.19448	5.4783	6.98879	14.8987	1.40297	4.94543	4.18072	1.61216	2.68537	1.71016	4.25936	5.58317	2.97914	1.47734
Inflation, consumer prices (annual %)	FP.CPI.TOTL.ZG	Chad	TCD	..	..	..	..	..	..	2.02924	7.51662	0.222672	1.68197	4.37713	-0.792441	-1.5371	4.27462	-0.971939	4.46414	-0.772844	5.78803	10.8364	8.89951
Inflation, consumer prices (annual %)	FP.CPI.TOTL.ZG	Channel Islands	CHI	..	..	..	..	..	..	..	..	..	..	..	..	..	..	..	..	..	..	..	..
Inflation, consumer prices (annual %)	FP.CPI.TOTL.ZG	Chile	CHL	3.05258	3.39202	4.4078	8.71627	0.353045	1.41071	3.34122	3.00745	1.78956	4.71868	4.34877	3.78619	2.18272	2.43489	2.55754	3.04549	4.52457	11.6439	7.58168	4.29764
Inflation, consumer prices (annual %)	FP.CPI.TOTL.ZG	China	CHN	1.77641	1.64943	4.81677	5.92525	-0.728165	3.17532	5.5539	2.61952	2.62105	1.92164	1.43702	2	1.59314	2.07479	2.89923	2.41942	0.981015	1.97358	0.234837	0.218129
Inflation, consumer prices (annual %)	FP.CPI.TOTL.ZG	Colombia	COL	5.05102	4.29342	5.54438	6.99688	4.20252	2.272	3.41503	3.1693	2.01699	2.89884	4.98983	7.51346	4.31431	3.24057	3.52302	2.52664	3.49506	10.1772	11.7359	6.60909
Inflation, consumer prices (annual %)	FP.CPI.TOTL.ZG	Comoros	COM	..	..	..	..	..	..	1.84266	6.31474	-4.29487	..	..	..	..	..	..	..	..	..	..	..
Inflation, consumer prices (annual %)	FP.CPI.TOTL.ZG	Congo, Dem. Rep.	COD	..	..	..	..	..	..	..	..	0.808223	1.24304	0.744199	2.88585	..	..	..	..	..	..	..	..
Inflation, consumer prices (annual %)	FP.CPI.TOTL.ZG	Congo, Rep.	COG	..	..	2.65465	4.95875	4.415	0.391525	1.75959	5.01019	4.63162	0.91214	3.1691	3.19056	0.450064	1.15278	2.20607	1.79537	1.71564	3.04344	4.30175	3.09144
Inflation, consumer prices (annual %)	FP.CPI.TOTL.ZG	Costa Rica	CRI	13.7983	11.4706	9.35724	13.4245	7.8427	5.66276	4.878	4.49545	5.23134	4.5192	0.801982	-0.0174789	1.62591	2.22111	2.09605	0.724911	1.72648	8.27477	0.525194	-0.412853
Inflation, consumer prices (annual %)	FP.CPI.TOTL.ZG	Cote d'Ivoire	CIV	3.88583	2.46719	1.89201	6.30853	1.0195	1.22646	4.91243	1.30451	2.58117	0.448682	1.2515	0.723178	0.685881	0.359409	-1.10686	2.42501	4.09195	5.27617	4.38712	3.46637
Inflation, consumer prices (annual %)	FP.CPI.TOTL.ZG	Croatia	HRV	..	3.18983	2.89928	6.07697	2.37853	1.03056	2.27273	3.41207	2.21658	-0.215196	-0.464499	-1.125	1.12937	1.50013	0.77182	0.154811	2.55451	10.7806	7.94128	2.972
Inflation, consumer prices (annual %)	FP.CPI.TOTL.ZG	Cuba	CUB	..	..	..	..	..	..	..	..	..	..	..	..	..	..	..	..	..	..	..	..
Inflation, consumer prices (annual %)	FP.CPI.TOTL.ZG	Curacao	CUW	4.11712	3.115	2.99572	6.87632	1.75332	2.77944	2.33253	3.18399	1.33232	1.49874	-0.476542	-0.047208	1.58559	2.58369	2.62221	..	..	..	..	..
Inflation, consumer prices (annual %)	FP.CPI.TOTL.ZG	Cyprus	CYP	2.56016	2.30469	2.37265	4.66901	0.326277	2.43004	3.28945	2.38905	-0.399358	-1.35499	-2.097	-1.42917	0.531766	1.43549	0.250371	-0.638423	2.44609	8.39548	3.54134	1.80023
Inflation, consumer prices (annual %)	FP.CPI.TOTL.ZG	Czechia	CZE	1.8571	2.53399	2.85312	6.35866	1.01938	1.47273	1.91722	3.28762	1.4383	0.343989	0.309365	0.683504	2.45053	2.14949	2.84788	3.1613	3.83984	15.1002	10.6613	2.43531
Inflation, consumer prices (annual %)	FP.CPI.TOTL.ZG	Denmark	DNK	1.81781	1.92422	1.69327	3.41627	1.30471	2.31092	2.75868	2.39791	0.789072	0.564021	0.452034	0.25	1.14713	0.813609	0.758132	0.420712	1.85305	7.69657	3.30518	1.3722
Inflation, consumer prices (annual %)	FP.CPI.TOTL.ZG	Djibouti	DJI	..	..	..	..	..	..	5.06871	3.73121	2.70603	1.34186	-0.84739	2.73841	0.568112	0.147971	3.31925	1.77741	1.18192	5.17981	1.49507	2.07655
Inflation, consumer prices (annual %)	FP.CPI.TOTL.ZG	Dominica	DMA	1.6819	2.20239	3.63222	6.35992	0.00626357	2.99937	1.13123	1.35677	-0.0464116	0.79925	-0.843827	0.141816	0.296253	0.989191	1.50462	1.22026	2.22891	2.8849	5.08677	2.58974
Inflation, consumer prices (annual %)	FP.CPI.TOTL.ZG	Dominican Republic	DOM	4.1902	7.57281	6.14357	10.6446	1.44215	6.32993	5.79677	3.6945	4.83095	2.99864	0.836746	1.61417	3.27956	3.56443	1.8106	3.78103	8.243	8.81109	4.78561	3.30223
Inflation, consumer prices (annual %)	FP.CPI.TOTL.ZG	Ecuador	ECU	2.16828	3.29875	2.27618	8.4001	5.15997	3.55438	4.47453	5.10172	2.72178	3.58922	3.96665	1.72826	0.417336	-0.224103	0.266013	-0.338872	0.133251	3.46617	2.21569	1.54733
Inflation, consumer prices (annual %)	FP.CPI.TOTL.ZG	Egypt, Arab Rep.	EGY	..	..	..	..	..	..	10.0649	7.11173	9.46972	10.0702	10.3705	13.8136	29.5066	14.4015	9.1528	5.04493	5.21405	13.8957	33.8848	28.2706
Inflation, consumer prices (annual %)	FP.CPI.TOTL.ZG	El Salvador	SLV	..	..	..	..	..	1.17934	5.12892	1.72973	0.757669	1.14134	-0.731384	0.604049	1.01235	1.09033	0.0753241	-0.37159	3.46693	7.19862	4.04555	0.853782
Inflation, consumer prices (annual %)	FP.CPI.TOTL.ZG	Equatorial Guinea	GNQ	..	..	..	..	..	..	4.80539	3.65662	2.94888	4.31	1.67663	1.41194	0.744355	1.06007	1.53028	4.7667	-0.0971008	4.78672	2.8595	2.9214
Inflation, consumer prices (annual %)	FP.CPI.TOTL.ZG	Eritrea	ERI	..	..	..	..	..	..	..	..	..	..	..	..	..	..	..	..	..	..	..	..
Inflation, consumer prices (annual %)	FP.CPI.TOTL.ZG	Estonia	EST	4.07971	4.43762	6.60133	10.3624	-0.0784083	2.97205	4.9819	3.9334	2.78057	-0.106175	-0.492326	0.148685	3.41724	3.43633	2.27726	-0.444531	4.65317	19.3983	9.15923	3.52056
Inflation, consumer prices (annual %)	FP.CPI.TOTL.ZG	Eswatini	SWZ	..	..	8.07609	12.6575	7.44823	4.50924	6.10743	8.93965	5.62131	5.68135	4.95124	7.84727	6.22138	4.81506	2.59802	..	..	..	..	..
Inflation, consumer prices (annual %)	FP.CPI.TOTL.ZG	Ethiopia	ETH	9.96997	12.2995	17.2404	44.3567	8.48364	8.14926	33.25	23.6004	7.46402	6.89002	9.5689	6.62813	10.6871	13.833	15.8096	20.3563	26.8395	33.8899	30.2188	21.0377
Inflation, consumer prices (annual %)	FP.CPI.TOTL.ZG	Faroe Islands	FRO	..	..	..	..	..	..	..	..	..	..	..	..	..	..	..	..	..	..	..	..
Inflation, consumer prices (annual %)	FP.CPI.TOTL.ZG	Fiji	FJI	..	..	..	..	3.13104	3.68901	7.27812	3.42338	2.91354	0.519306	1.37489	3.86323	3.34758	4.08148	1.7731	-2.59524	0.155856	4.52019	2.14817	4.51138
Inflation, consumer prices (annual %)	FP.CPI.TOTL.ZG	Finland	FIN	0.623874	1.56666	2.51067	4.06595	-9.1736e-07	1.18414	3.41681	2.80834	1.47829	1.0412	-0.207929	0.356685	0.754015	1.08382	1.02409	0.290555	2.19457	7.12351	6.25064	1.56569
Inflation, consumer prices (annual %)	FP.CPI.TOTL.ZG	France	FRA	1.74587	1.67512	1.488	2.81286	0.0876205	1.53112	2.1116	1.9542	0.863715	0.507759	0.0375144	0.183335	1.03228	1.85082	1.10825	0.476499	1.64233	5.22237	4.87836	1.99905
Inflation, consumer prices (annual %)	FP.CPI.TOTL.ZG	French Polynesia	PYF	..	..	..	..	..	..	..	..	..	..	..	..	..	..	..	..	..	..	..	..
Inflation, consumer prices (annual %)	FP.CPI.TOTL.ZG	Gabon	GAB	..	..	..	..	..	..	1.26332	2.65242	0.505441	4.69046	-0.338795	2.10671	2.65193	4.74907	2.46457	1.35276	1.08691	4.23125	3.62902	1.17312
Inflation, consumer prices (annual %)	FP.CPI.TOTL.ZG	Gambia, The	GMB	..	2.0565	5.36913	4.44365	4.56151	5.04968	4.79588	4.25432	5.69913	5.948	6.80845	7.22879	8.03419	6.52097	7.11568	5.93128	7.37035	11.5131	16.9742	11.5611
Inflation, consumer prices (annual %)	FP.CPI.TOTL.ZG	Georgia	GEO	..	9.16097	9.2449	9.99949	1.72751	7.11018	8.54293	-0.943659	-0.512058	3.06881	4.00358	2.13493	6.03532	2.61524	4.8529	5.20246	9.56691	11.8982	2.48776	1.10972
Inflation, consumer prices (annual %)	FP.CPI.TOTL.ZG	Germany	DEU	1.54691	1.57743	2.29834	2.62838	0.312739	1.10381	2.07517	2.00849	1.50472	0.906794	0.514426	0.491747	1.50949	1.73217	1.44566	0.144878	3.06667	6.87257	5.94644	2.2565
Inflation, consumer prices (annual %)	FP.CPI.TOTL.ZG	Ghana	GHA	15.439	11.6792	10.7343	16.4946	19.2469	10.7334	8.72846	11.1863	11.6662	15.4896	17.15	17.4546	12.3719	7.80877	7.14364	9.88729	9.97109	31.2559	38.107	22.8483
Inflation, consumer prices (annual %)	FP.CPI.TOTL.ZG	Gibraltar	GIB	..	..	..	..	..	..	..	..	..	..	..	..	..	..	..	..	..	..	..	..
Inflation, consumer prices (annual %)	FP.CPI.TOTL.ZG	Greece	GRC	3.54507	3.19595	2.895	4.1528	1.21007	4.71299	3.32985	1.50153	-0.921269	-1.31226	-1.73589	-0.825654	1.12125	0.625621	0.253008	-1.24798	1.22383	9.64526	3.4648	2.74149
Inflation, consumer prices (annual %)	FP.CPI.TOTL.ZG	Greenland	GRL	..	..	..	..	..	..	..	..	..	..	..	..	..	..	..	..	..	..	..	..
Inflation, consumer prices (annual %)	FP.CPI.TOTL.ZG	Grenada	GRD	3.47581	4.25195	3.85883	8.03327	-0.308655	3.43651	3.03347	2.41078	-0.0439998	-0.983603	-0.515448	1.65039	0.908458	0.804102	0.59815	-0.740733	1.21951	2.58054	2.69612	1.08615
Inflation, consumer prices (annual %)	FP.CPI.TOTL.ZG	Guam	GUM	..	..	..	..	..	..	..	..	..	..	..	..	..	..	..	..	..	..	..	..
Inflation, consumer prices (annual %)	FP.CPI.TOTL.ZG	Guatemala	GTM	..	6.56085	6.82162	11.3558	1.8591	3.85951	6.21412	3.78181	4.34337	3.41836	2.38872	4.44844	4.42454	3.75186	3.69998	3.21444	4.26105	6.88513	6.20658	2.86993
Inflation, consumer prices (annual %)	FP.CPI.TOTL.ZG	Guinea	GIN	..	..	18.1756	23.0656	4.68439	15.0503	21.3169	15.2263	11.8876	6.15051	11.7801	8.17268	8.91436	9.82762	9.47001	10.6016	12.5973	10.493	7.80498	8.12314
Inflation, consumer prices (annual %)	FP.CPI.TOTL.ZG	Guinea-Bissau	GNB	..	..	..	..	..	..	5.0461	2.13055	1.20713	-1.50924	1.47672	1.50312	1.69111	0.381325	0.2466	1.14001	2.24249	9.39076	7.10221	3.76556
Inflation, consumer prices (annual %)	FP.CPI.TOTL.ZG	Guyana	GUY	..	6.67716	12.2002	8.10202	2.9523	3.73338	4.97774	2.39194	1.90125	0.85263	-1.00173	0.836008	1.90466	1.28284	2.08723	0.993337	5.03286	6.11506	2.8211	2.90395
Inflation, consumer prices (annual %)	FP.CPI.TOTL.ZG	Haiti	HTI	13.973	11.3452	6.55723	15.2818	0.393886	4.82734	6.33279	5.01804	4.76502	3.43817	6.73184	11.5029	10.6801	12.4814	18.7038	22.7963	16.8415	33.9839	36.8135	26.9491
Inflation, consumer prices (annual %)	FP.CPI.TOTL.ZG	Honduras	HND	8.80906	5.57775	6.93621	11.4034	5.49634	4.69889	6.76228	5.19619	5.1619	6.12925	3.15783	2.72461	3.93436	4.34735	4.36587	3.46841	4.48088	9.08964	6.66325	4.60621
Inflation, consumer prices (annual %)	FP.CPI.TOTL.ZG	Hong Kong SAR, China	HKG	..	2.00025	2.03503	4.30315	0.579441	2.29289	5.30525	4.05391	4.33799	4.42365	2.99085	2.40931	1.49387	2.40613	2.88321	0.250962	1.56876	1.88137	2.09661	1.72972
Inflation, consumer prices (annual %)	FP.CPI.TOTL.ZG	Hungary	HUN	3.56152	3.93033	7.95875	6.04251	4.21171	4.85556	3.92992	5.65215	1.7332	-0.227566	-0.0616447	0.394769	2.34824	2.85025	3.33859	3.32674	5.11097	14.6081	17.125	3.7037
Inflation, consumer prices (annual %)	FP.CPI.TOTL.ZG	Iceland	ISL	3.98705	6.68708	5.05156	12.6944	12.0031	5.39673	4.00103	5.1859	3.87228	2.04461	1.63306	1.69693	1.76042	2.68292	3.01397	2.84792	4.44424	8.30876	8.7363	5.85684
Inflation, consumer prices (annual %)	FP.CPI.TOTL.ZG	India	IND	4.24634	5.79652	6.37288	8.34927	10.8824	11.9894	8.91179	9.479	10.0179	6.66566	4.90697	4.94822	3.32817	3.93883	3.72951	6.62344	5.13141	6.69903	5.64914	4.95304
Inflation, consumer prices (annual %)	FP.CPI.TOTL.ZG	Indonesia	IDN	10.4532	13.1087	6.40656	10.2267	4.38641	5.13421	5.35605	4.27951	6.41249	6.39493	6.36312	3.5258	3.8088	3.19835	3.03058	1.91984	1.56008	4.20946	3.66939	2.18151
Inflation, consumer prices (annual %)	FP.CPI.TOTL.ZG	Iran, Islamic Rep.	IRN	..	10.0159	17.341	25.4105	13.5516	10.0894	26.2934	27.2568	36.603	16.6066	12.4847	7.24543	8.04492	18.0141	39.9073	30.5941	43.389	43.4885	44.5792	32.4559
Inflation, consumer prices (annual %)	FP.CPI.TOTL.ZG	Iraq	IRQ	..	..	..	..	..	..	..	..	..	..	..	0.556521	0.184059	0.367441	-0.198965	0.574163	6.04186	4.99477	4.35835	-12.297
Inflation, consumer prices (annual %)	FP.CPI.TOTL.ZG	Ireland	IRL	2.45655	3.93576	4.88575	4.03569	-4.44755	-0.918389	2.54898	1.69474	0.515099	0.190916	-0.33096	0.0201248	0.362173	0.471131	0.937843	-0.326184	2.34034	7.82946	6.29942	2.11345
Inflation, consumer prices (annual %)	FP.CPI.TOTL.ZG	Isle of Man	IMN	..	..	..	..	..	..	..	..	..	..	..	..	..	..	..	..	..	..	..	..
Inflation, consumer prices (annual %)	FP.CPI.TOTL.ZG	Israel	ISR	1.3407	2.05408	0.466227	4.52745	3.36762	2.7027	3.48837	1.67554	1.58976	0.467557	-0.617343	-0.535168	0.249808	0.80506	0.817646	-0.575255	1.47965	4.41163	4.22523	3.07481
Inflation, consumer prices (annual %)	FP.CPI.TOTL.ZG	Italy	ITA	1.98529	2.09084	1.82974	3.34783	0.774768	1.52552	2.78063	3.04136	1.21999	0.241047	0.0387904	-0.0940167	1.22653	1.13749	0.611247	-0.137708	1.87378	8.20129	5.62219	0.982373
Inflation, consumer prices (annual %)	FP.CPI.TOTL.ZG	Jamaica	JAM	15.0529	8.56106	9.24482	22.0228	9.59225	12.6106	7.55586	6.87398	9.3415	8.27408	3.69154	2.35102	4.3784	3.73664	3.9051	5.22678	5.86278	10.3496	6.47414	5.41194
Inflation, consumer prices (annual %)	FP.CPI.TOTL.ZG	Japan	JPN	-0.282946	0.249355	0.0600395	1.38008	-1.35284	-0.728243	-0.272456	-0.0440645	0.335038	2.75923	0.79528	-0.127259	0.4842	0.989095	0.468776	-0.0249958	-0.233353	2.4977	3.26813	2.73854
Inflation, consumer prices (annual %)	FP.CPI.TOTL.ZG	Jordan	JOR	..	..	4.74391	13.9712	-0.73907	4.84552	4.16244	4.51523	4.82462	2.89948	-0.876851	-0.77843	3.32389	4.46231	0.761514	0.333294	1.34609	4.22916	2.08487	1.5566
Inflation, consumer prices (annual %)	FP.CPI.TOTL.ZG	Kazakhstan	KAZ	7.58	8.72169	10.8468	17.1399	7.31608	7.40046	8.4529	5.19568	5.94284	6.84945	6.67829	14.3611	7.44266	6.16366	5.33356	6.71815	8.04147	15.0279	14.725	8.83944
Inflation, consumer prices (annual %)	FP.CPI.TOTL.ZG	Kenya	KEN	..	..	..	..	..	..	14.0225	9.37777	5.71749	6.87815	6.58215	6.29725	8.00565	4.68981	5.23964	5.40516	6.10794	7.65986	7.6714	4.48979
Inflation, consumer prices (annual %)	FP.CPI.TOTL.ZG	Kiribati	KIR	..	..	3.59252	13.6654	9.81644	-3.89955	1.49741	-3.04586	-1.48806	2.10399	0.572016	1.91731	0.355521	0.56403	-1.81308	2.55325	2.05362	5.34595	9.28307	..
Inflation, consumer prices (annual %)	FP.CPI.TOTL.ZG	Korea, Dem. People's Rep.	PRK	..	..	..	..	..	..	..	..	..	..	..	..	..	..	..	..	..	..	..	..
Inflation, consumer prices (annual %)	FP.CPI.TOTL.ZG	Korea, Rep.	KOR	2.75379	2.24234	2.53457	4.6739	2.7565	2.93929	4.02597	2.18707	1.30135	1.27477	0.706332	0.971686	1.94433	1.47584	0.383	0.537288	2.49833	5.08951	3.59746	2.32174
Inflation, consumer prices (annual %)	FP.CPI.TOTL.ZG	Kosovo	XKX	..	0.621647	4.3585	9.35042	-2.41026	3.48051	7.33642	2.47674	1.76732	0.428958	-0.536929	0.273169	1.48823	1.0538	2.67599	0.198228	3.35369	11.5805	4.94432	1.61945
Inflation, consumer prices (annual %)	FP.CPI.TOTL.ZG	Kuwait	KWT	..	..	..	..	..	..	4.8394	3.25515	2.6823	2.90893	3.2717	3.1984	2.17183	0.543133	1.09185	2.10173	3.42363	3.98065	3.64216	2.89855
Inflation, consumer prices (annual %)	FP.CPI.TOTL.ZG	Kyrgyz Republic	KGZ	4.33867	5.55212	10.2301	24.5201	6.83656	7.96772	16.6363	2.76844	6.61375	7.53425	6.50332	0.388838	3.17531	1.54266	1.13362	6.32542	11.905	13.9229	10.7533	..
Inflation, consumer prices (annual %)	FP.CPI.TOTL.ZG	Lao PDR	LAO	..	6.54559	4.66197	7.62881	0.141188	5.98255	7.56899	4.25513	6.37143	4.12924	1.27735	1.59691	0.825479	2.04039	3.32256	5.10407	3.75562	22.9562	31.2301	23.1306
Inflation, consumer prices (annual %)	FP.CPI.TOTL.ZG	Latvia	LVA	6.74845	6.5362	10.093	15.4023	3.53411	-1.08464	4.37074	2.25779	-0.0294548	0.620491	0.174242	0.140633	2.93036	2.53445	2.81141	0.219065	3.27583	17.3103	8.93805	1.2658
Inflation, consumer prices (annual %)	FP.CPI.TOTL.ZG	Lebanon	LBN	..	..	..	..	1.1951	3.98348	4.97149	6.58147	4.82102	1.8546	-3.74915	-0.78336	4.32135	6.07699	3.00539	84.8643	154.756	171.205	221.342	45.243
Inflation, consumer prices (annual %)	FP.CPI.TOTL.ZG	Lesotho	LSO	..	6.07272	8.01244	10.7157	-16.8597	-2.40524	5.03663	6.05144	4.86512	5.37029	3.21845	6.5965	4.4477	4.7518	5.18708	4.9781	6.04775	8.2718	6.34222	6.10545
Inflation, consumer prices (annual %)	FP.CPI.TOTL.ZG	Liberia	LBR	..	..	11.3919	17.4894	7.42764	7.28993	8.48817	6.83179	7.57731	9.86111	7.7487	8.83425	12.4196	23.5635	26.9663	16.9557	7.81559	7.59298	10.0945	8.21497
Inflation, consumer prices (annual %)	FP.CPI.TOTL.ZG	Libya	LBY	..	..	..	..	..	..	15.5185	6.0598	2.60582	2.43294	10.4023	25.8539	25.8036	13.1702	-2.16218	1.44704	2.86833	4.5103	2.37318	2.12616
Inflation, consumer prices (annual %)	FP.CPI.TOTL.ZG	Liechtenstein	LIE	..	..	..	..	..	..	..	..	..	..	..	..	..	..	..	..	..	..	..	..
Inflation, consumer prices (annual %)	FP.CPI.TOTL.ZG	Lithuania	LTU	2.65848	3.73912	5.73717	10.9259	4.45304	1.31921	4.13028	3.08998	1.04748	0.103758	-0.884097	0.905525	3.72289	2.69793	2.33451	1.19989	4.68354	19.705	9.11732	0.715736
Inflation, consumer prices (annual %)	FP.CPI.TOTL.ZG	Luxembourg	LUX	2.4877	2.66631	2.31246	3.40188	0.368042	2.27368	3.41068	2.66284	1.73404	0.628544	0.474743	0.290833	1.7308	1.5282	1.74332	0.819957	2.52692	6.33601	3.7414	2.05113
Inflation, consumer prices (annual %)	FP.CPI.TOTL.ZG	Macao SAR, China	MAC	4.39589	5.14997	5.5715	8.61102	1.16907	2.80947	5.80625	6.10739	5.50058	6.04823	4.56056	2.36896	1.22812	3.00446	2.75193	0.811411	0.0264544	1.04503	0.476384	..
Inflation, consumer prices (annual %)	FP.CPI.TOTL.ZG	Madagascar	MDG	18.3638	10.7656	10.288	9.29651	8.95422	9.24732	9.48254	5.71384	5.82643	6.08041	7.40419	6.03576	8.60905	8.59423	5.61051	4.20179	5.81225	8.16059	9.87433	..
Inflation, consumer prices (annual %)	FP.CPI.TOTL.ZG	Malawi	MWI	..	..	..	..	..	..	7.62282	21.2713	27.2833	23.7921	21.8673	21.7111	11.5434	12.4202	9.37084	8.62551	9.33014	20.954	28.7897	32.1797
Inflation, consumer prices (annual %)	FP.CPI.TOTL.ZG	Malaysia	MYS	2.97507	3.60924	2.02735	5.44078	0.583308	1.62285	3.17447	1.66357	2.10501	3.14299	2.10439	2.09057	3.8712	0.884709	0.662892	-1.1387	2.4771	3.3787	2.48887	1.8341
Inflation, consumer prices (annual %)	FP.CPI.TOTL.ZG	Maldives	MDV	1.30028	2.73842	6.79477	12.0415	4.53018	6.14989	11.2734	10.8847	3.80563	2.12	0.953207	0.502509	2.81747	-0.133373	0.22003	-1.36977	0.54315	2.33314	2.92747	1.3998
Inflation, consumer prices (annual %)	FP.CPI.TOTL.ZG	Mali	MLI	..	..	..	..	..	..	2.95564	5.32313	-0.606736	0.883815	1.45069	-1.79965	1.75986	0.299547	-1.65827	0.438089	3.9256	9.62148	2.0588	3.2064
Inflation, consumer prices (annual %)	FP.CPI.TOTL.ZG	Malta	MLT	..	2.77378	1.24922	4.25862	2.08433	1.51564	2.96299	2.37582	1.18028	0.310306	1.10055	0.642703	1.36435	1.15782	1.64206	0.638545	1.49789	6.15376	5.09397	1.65079
Inflation, consumer prices (annual %)	FP.CPI.TOTL.ZG	Marshall Islands	MHL	..	..	..	..	..	..	..	..	..	..	..	..	..	..	..	..	..	..	..	..
Inflation, consumer prices (annual %)	FP.CPI.TOTL.ZG	Mauritania	MRT	..	..	..	..	..	..	5.68632	4.90243	4.1291	3.53437	3.25473	1.47171	2.25428	3.06736	2.30009	2.38569	3.56516	9.52527	4.95305	2.49164
Inflation, consumer prices (annual %)	FP.CPI.TOTL.ZG	Mauritius	MUS	4.93717	8.9135	8.82729	9.73228	2.51609	2.93236	6.52249	3.85216	3.5433	3.21769	1.28655	0.977675	3.667	3.21605	0.405655	2.5808	4.02853	10.7738	7.05298	3.60452
Inflation, consumer prices (annual %)	FP.CPI.TOTL.ZG	Mexico	MEX	3.98806	3.62947	3.96685	5.12498	5.29736	4.15673	3.40738	4.11151	3.80639	4.01862	2.72064	2.82171	6.04146	4.89935	3.63596	3.39683	5.68921	7.89628	5.52796	4.72226
Inflation, consumer prices (annual %)	FP.CPI.TOTL.ZG	Micronesia, Fed. Sts.	FSM	4.2577	4.63737	3.30634	8.42373	6.3936	3.31371	5.08259	5.0185	1.75233	0.650285	-0.298116	-1.03747	0.582254	1.4984	1.92385	0.554595	3.19128	5.40874	..	..
Inflation, consumer prices (annual %)	FP.CPI.TOTL.ZG	Moldova	MDA	11.9592	12.7778	12.3672	12.783	-0.0627186	7.48385	7.68725	4.54633	4.59788	5.08879	9.67624	6.35931	6.57023	3.04505	4.83778	3.76597	5.10641	28.7373	13.417	4.67774
Inflation, consumer prices (annual %)	FP.CPI.TOTL.ZG	Monaco	MCO	..	..	..	..	..	..	..	..	..	..	..	..	..	..	..	..	..	..	..	..
Inflation, consumer prices (annual %)	FP.CPI.TOTL.ZG	Mongolia	MNG	..	..	9.63096	27.9557	7.61951	10.0462	8.41121	14.3303	10.4907	12.254	5.73568	0.733272	4.30143	6.82425	7.30107	3.72372	7.35895	15.151	10.3503	6.20568
Inflation, consumer prices (annual %)	FP.CPI.TOTL.ZG	Montenegro	MNE	..	..	..	..	..	..	3.45014	4.14525	2.20589	-0.710514	1.54869	-0.271385	2.38024	2.61122	0.361564	-0.255656	2.4108	13.0403	8.58477	3.33675
Inflation, consumer prices (annual %)	FP.CPI.TOTL.ZG	Morocco	MAR	..	..	..	3.71484	0.971863	0.993557	0.906925	1.28712	1.88065	0.44231	1.55791	1.63531	0.754663	1.80392	0.303386	0.705969	1.40196	6.65704	6.09114	0.985257
Inflation, consumer prices (annual %)	FP.CPI.TOTL.ZG	Mozambique	MOZ	6.42755	13.2451	8.48949	14.5028	3.78861	12.4255	11.1666	2.60245	4.26135	2.55975	3.55076	17.418	15.1132	3.91133	2.8027	3.48394	6.40848	10.2794	7.12697	4.07857
Inflation, consumer prices (annual %)	FP.CPI.TOTL.ZG	Myanmar	MMR	..	..	..	..	..	..	5.02146	1.46758	5.64304	4.9533	9.45417	6.92883	4.57254	6.87233	8.82507	..	..	..	..	..
Inflation, consumer prices (annual %)	FP.CPI.TOTL.ZG	Namibia	NAM	..	4.96117	6.54788	9.09464	9.45173	4.87492	5.0056	6.722	5.60093	5.35017	3.39402	6.72858	6.1458	4.29159	3.72239	2.20938	3.61691	6.08128	5.87993	4.23904
Inflation, consumer prices (annual %)	FP.CPI.TOTL.ZG	Nauru	NRU	..	..	..	..	..	..	0.3003	-0.12475	..	..	..	..	..	..	..	..	..	..	..	..
Inflation, consumer prices (annual %)	FP.CPI.TOTL.ZG	Nepal	NPL	6.83633	6.92034	2.26922	9.90783	11.0948	9.3265	9.22708	9.45981	9.04016	8.36415	7.86891	8.79034	3.6271	4.06116	5.56869	5.05237	4.14968	7.65079	7.11476	..
Inflation, consumer prices (annual %)	FP.CPI.TOTL.ZG	Netherlands	NLD	1.68813	1.1015	1.61386	2.4865	1.18978	1.27531	2.34107	2.45555	2.5069	0.976035	0.600248	0.316667	1.38146	1.7035	2.6337	1.27246	2.67572	10.0012	3.83839	3.34754
Inflation, consumer prices (annual %)	FP.CPI.TOTL.ZG	New Caledonia	NCL	..	..	..	..	..	..	2.429	1.74967	1.27761	0.178851	0.570508	0.578317	..	..	..	..	..	..	..	..
Inflation, consumer prices (annual %)	FP.CPI.TOTL.ZG	New Zealand	NZL	3.03702	3.3654	2.37614	3.95895	2.11565	2.30202	4.02791	1.05991	1.13442	1.22751	0.292705	0.64624	1.85079	1.5983	1.61963	1.71456	3.94112	7.17222	5.73316	2.9228
Inflation, consumer prices (annual %)	FP.CPI.TOTL.ZG	Nicaragua	NIC	..	9.1402	11.1269	19.8262	3.687	5.45513	8.08239	7.19355	7.13547	6.03597	3.99738	3.52317	3.85067	4.94724	5.37629	3.68181	4.92841	10.4674	8.38766	4.62474
Inflation, consumer prices (annual %)	FP.CPI.TOTL.ZG	Niger	NER	..	..	..	..	..	..	2.94239	0.45509	2.29723	-0.930287	-0.57609	1.65389	2.79637	2.9676	-2.48979	2.89819	3.83787	4.22622	3.70097	9.07152
Inflation, consumer prices (annual %)	FP.CPI.TOTL.ZG	Nigeria	NGA	..	8.22522	5.38801	11.5811	12.5378	13.7401	10.8261	12.2242	8.49552	8.04741	9.00943	15.6968	16.5023	12.0951	11.3964	13.246	16.9528	18.8472	24.6596	33.2421
Inflation, consumer prices (annual %)	FP.CPI.TOTL.ZG	North Macedonia	MKD	0.525516	3.21363	2.25176	8.3319	-0.739634	1.50998	3.90475	3.31606	2.785	-0.281705	-0.29992	-0.239291	1.35162	1.45831	0.76644	1.20007	3.23075	14.2047	9.36187	3.48974
Inflation, consumer prices (annual %)	FP.CPI.TOTL.ZG	Northern Mariana Islands	MNP	..	..	..	..	..	..	..	..	..	..	..	..	..	..	..	..	..	..	..	..
Inflation, consumer prices (annual %)	FP.CPI.TOTL.ZG	Norway	NOR	1.53213	2.32935	0.712589	3.75393	2.19739	2.41891	1.28495	0.696864	2.12049	2.0417	2.17114	3.55	1.8751	2.76483	2.16773	1.28658	3.48388	5.76412	5.51785	3.1453
Inflation, consumer prices (annual %)	FP.CPI.TOTL.ZG	Oman	OMN	1.90984	3.54499	5.83048	12.3754	3.46881	3.25658	4.04219	2.94773	1.05355	1.01401	0.0652901	1.10921	1.58909	0.889312	0.490815	-0.406403	1.68221	2.50614	0.950783	0.593589
Inflation, consumer prices (annual %)	FP.CPI.TOTL.ZG	Pakistan	PAK	..	..	..	..	..	12.9389	11.9161	9.68235	7.69216	7.18938	2.52933	3.76512	4.08537	5.07806	10.5784	9.73999	9.49621	19.8739	30.7681	12.6325
Inflation, consumer prices (annual %)	FP.CPI.TOTL.ZG	Palau	PLW	3.95146	4.42981	3.23875	11.9656	1.43814	1.44219	4.6747	3.61418	3.35481	4.19175	0.949041	-1.04231	1.41799	2.1097	0.26738	0.218182	2.61248	12.3527	12.82	2.23173
Inflation, consumer prices (annual %)	FP.CPI.TOTL.ZG	Panama	PAN	2.85588	2.45789	4.16863	8.75868	2.40905	3.49129	5.8758	5.6982	4.02716	2.62653	0.137492	0.739734	0.875586	0.761578	-0.355084	-1.55028	1.6307	2.85965	1.48641	0.693226
Inflation, consumer prices (annual %)	FP.CPI.TOTL.ZG	Papua New Guinea	PNG	..	..	..	..	..	..	4.44083	4.53721	4.96032	5.22212	5.99596	6.67373	5.42205	4.37449	3.92867	4.87167	4.48359	5.25324	2.2987	0.602404
Inflation, consumer prices (annual %)	FP.CPI.TOTL.ZG	Paraguay	PRY	..	9.58935	8.13047	10.1548	2.59195	4.65116	8.25397	3.67592	2.68386	5.02883	3.129	4.08682	3.60248	3.97561	2.7571	1.76752	4.78798	9.76557	4.63202	3.8354
Inflation, consumer prices (annual %)	FP.CPI.TOTL.ZG	Peru	PER	..	..	..	..	..	..	3.36931	3.61121	2.7679	3.41195	3.39809	3.55718	2.9949	1.50915	2.25212	2.00241	4.27166	8.33371	6.45561	2.00771
Inflation, consumer prices (annual %)	FP.CPI.TOTL.ZG	Philippines	PHL	..	..	..	..	..	..	4.71842	3.02696	2.58269	3.59782	0.674193	1.2537	2.85319	5.30935	2.39207	2.39316	3.92718	5.82116	5.97803	3.2126
Inflation, consumer prices (annual %)	FP.CPI.TOTL.ZG	Poland	POL	2.1838	1.28469	2.45874	4.16497	3.79539	2.58069	4.2394	3.56037	0.991983	0.0538213	-0.874126	-0.664767	2.07594	1.81295	2.22748	3.37447	5.05503	14.4295	11.5289	3.78426
Inflation, consumer prices (annual %)	FP.CPI.TOTL.ZG	Portugal	PRT	2.27716	3.10767	2.45397	2.58851	-0.83553	1.40257	3.65301	2.77334	0.274417	-0.278153	0.487939	0.607397	1.36861	0.993716	0.338178	-0.0124383	1.26566	7.83269	4.31128	2.41613
Inflation, consumer prices (annual %)	FP.CPI.TOTL.ZG	Puerto Rico (US)	PRI	..	..	..	..	..	..	..	..	..	..	..	..	..	..	..	..	..	..	..	..
Inflation, consumer prices (annual %)	FP.CPI.TOTL.ZG	Qatar	QAT	..	..	..	..	..	..	1.13837	2.31535	3.22198	3.34972	1.81408	2.67659	0.394879	0.255815	-0.666641	-2.54032	2.30447	4.99528	3.02765	1.26734
Inflation, consumer prices (annual %)	FP.CPI.TOTL.ZG	Romania	ROU	9.01491	6.55851	4.83733	7.8508	5.58742	6.09142	5.78925	3.33492	3.98471	1.06831	-0.594156	-1.5448	1.33902	4.62548	3.82785	2.63107	5.05233	13.7955	10.3972	5.72141
Inflation, consumer prices (annual %)	FP.CPI.TOTL.ZG	Russian Federation	RUS	12.6853	9.66865	9.0073	14.1108	11.6473	6.84939	8.44046	5.07474	6.75371	7.82341	15.5344	7.04245	3.68333	2.8783	4.47037	3.38166	6.69446	..	..	..
Inflation, consumer prices (annual %)	FP.CPI.TOTL.ZG	Rwanda	RWA	9.01409	8.88283	9.08072	15.4382	12.9444	-0.246129	3.08017	10.271	5.92427	2.35449	2.5285	7.17434	8.27954	-0.31121	3.34788	9.8504	-0.391347	17.6892	19.7895	1.77029
Inflation, consumer prices (annual %)	FP.CPI.TOTL.ZG	Samoa	WSM	..	3.70009	5.57706	11.5659	6.32495	0.777007	5.23542	2.04902	0.610086	-0.406816	0.72447	1.30472	1.7499	4.19746	0.982327	-1.56891	3.1332	10.9619	7.92165	2.17246
Inflation, consumer prices (annual %)	FP.CPI.TOTL.ZG	San Marino	SMR	..	..	..	..	..	..	2.8998	2.82733	1.60439	1.11296	0.145686	0.644075	1.01413	1.16334	0.472652	-0.133369	1.61551	5.32545	5.93191	1.24217
Inflation, consumer prices (annual %)	FP.CPI.TOTL.ZG	Sao Tome and Principe	STP	..	..	..	..	..	..	14.3272	10.6379	8.10583	6.9985	5.24588	5.43052	5.6903	7.8686	7.72025	9.81933	8.13777	18.0056	21.2589	14.3519
Inflation, consumer prices (annual %)	FP.CPI.TOTL.ZG	Saudi Arabia	SAU	0.479229	2.20902	4.16783	9.87024	5.05722	5.33942	5.82622	2.86627	3.52996	2.23917	1.20469	2.06741	-0.83641	2.4572	-2.09335	3.44547	3.06329	2.47407	2.32709	1.68792
Inflation, consumer prices (annual %)	FP.CPI.TOTL.ZG	Senegal	SEN	1.71133	2.11229	5.8533	7.3472	-2.24802	1.22868	3.40323	1.41823	0.710245	-1.09026	0.135212	0.837285	1.31815	0.460986	1.76011	2.54315	2.18032	9.69682	5.93948	0.804503
Inflation, consumer prices (annual %)	FP.CPI.TOTL.ZG	Serbia	SRB	..	..	..	12.411	8.11695	6.14255	11.1374	7.33039	7.69426	2.08245	1.39236	1.12231	3.13106	1.95984	1.84923	1.57553	4.0851	11.9815	12.3719	4.67053
Inflation, consumer prices (annual %)	FP.CPI.TOTL.ZG	Seychelles	SYC	..	..	..	36.9648	31.7544	-2.40464	2.55927	7.11037	4.33894	1.38583	4.04194	-1.01548	2.8568	3.70292	1.80709	1.20266	9.7691	2.62604	-1.0353	0.311726
Inflation, consumer prices (annual %)	FP.CPI.TOTL.ZG	Sierra Leone	SLE	..	..	..	8.21112	7.46902	7.18566	6.79138	6.58776	5.52413	4.63931	6.68944	10.8861	18.2215	16.0295	14.805	13.4469	11.874	27.2083	47.6429	28.6338
Inflation, consumer prices (annual %)	FP.CPI.TOTL.ZG	Singapore	SGP	..	0.965658	2.1098	6.63544	0.589142	2.82885	5.25116	4.58084	2.3644	1.03317	-0.521976	-0.52981	0.576763	0.438784	0.56783	-0.172112	2.3161	6.13095	4.83372	2.38951
Inflation, consumer prices (annual %)	FP.CPI.TOTL.ZG	Sint Maarten (Dutch part)	SXM	..	..	..	..	..	..	4.58475	4.01518	2.52865	1.88675	0.330027	0.111683	2.19201	..	..	..	..	..	..	..
Inflation, consumer prices (annual %)	FP.CPI.TOTL.ZG	Slovak Republic	SVK	2.70908	4.48333	2.75672	4.59818	1.6151	0.957018	3.91929	3.6061	1.40047	-0.0761653	-0.32522	-0.52001	1.31195	2.51404	2.66456	1.93694	3.14961	12.7741	10.5319	2.75761
Inflation, consumer prices (annual %)	FP.CPI.TOTL.ZG	Slovenia	SVN	2.4515	2.45792	3.6575	5.64742	0.839262	1.80117	1.80285	2.59741	1.7692	0.199344	-0.525552	-0.0549995	1.42911	1.73861	1.63052	-0.0548568	1.91707	8.8337	7.44688	1.96563
Inflation, consumer prices (annual %)	FP.CPI.TOTL.ZG	Solomon Islands	SLB	..	..	..	..	..	..	..	..	..	..	-0.574469	0.512486	0.488687	3.46147	1.63486	2.96355	-0.115438	5.51813	5.88586	4.32184
Inflation, consumer prices (annual %)	FP.CPI.TOTL.ZG	Somalia, Fed. Rep.	SOM	..	..	..	..	..	..	..	..	..	..	..	..	..	..	..	..	..	..	..	..
Inflation, consumer prices (annual %)	FP.CPI.TOTL.ZG	South Africa	ZAF	2.06285	3.24391	6.17781	9.90998	7.2381	4.0675	5.00085	5.73797	5.78017	6.13283	4.51869	6.60291	5.18619	4.50987	4.10285	3.23239	4.61875	7.03987	6.07524	4.36115
Inflation, consumer prices (annual %)	FP.CPI.TOTL.ZG	South Sudan	SSD	..	..	..	..	5.00627	1.16962	46.8522	45.5259	-0.058091	1.6743	52.7663	380	187.852	83.5015	87.2414	29.6758	10.5167	-6.68732	2.3828	91.4408
Inflation, consumer prices (annual %)	FP.CPI.TOTL.ZG	Spain	ESP	3.36881	3.51558	2.7868	4.07534	-0.287813	1.79986	3.1961	2.44613	1.40858	-0.151115	-0.500366	-0.202598	1.95608	1.67498	0.699519	-0.322753	3.09314	8.39058	3.53236	2.77418
Inflation, consumer prices (annual %)	FP.CPI.TOTL.ZG	Sri Lanka	LKA	..	..	..	..	..	..	6.71677	7.54291	6.90845	3.179	3.76837	3.95889	7.70414	2.13504	3.52839	6.15395	7.01478	49.7211	16.5412	-0.42936
Inflation, consumer prices (annual %)	FP.CPI.TOTL.ZG	St. Kitts and Nevis	KNA	..	8.48749	4.48089	5.3003	2.05794	0.850879	5.83517	0.816089	1.10699	0.247865	-2.30188	-0.687037	0.694917	-1.03712	-0.329562	-1.16725	1.19569	2.66818	3.55711	1.09539
Inflation, consumer prices (annual %)	FP.CPI.TOTL.ZG	St. Lucia	LCA	3.89827	2.39562	2.8231	5.54955	-0.156936	3.25034	2.76941	4.17764	1.46857	3.51696	-0.983601	-3.07822	0.104262	1.93562	0.539088	-1.75581	2.4107	6.37815	4.07061	-0.110284
Inflation, consumer prices (annual %)	FP.CPI.TOTL.ZG	St. Martin (French part)	MAF	..	..	..	..	..	..	..	..	..	..	..	..	..	..	..	..	..	..	..	..
Inflation, consumer prices (annual %)	FP.CPI.TOTL.ZG	St. Vincent and the Grenadines	VCT	3.73343	2.74068	7.23615	10.0662	0.421539	0.747109	3.18603	2.59844	0.805128	0.193859	-1.73361	-0.149642	2.15334	2.32414	0.91307	-0.628131	1.57273	5.6601	4.56458	3.62771
Inflation, consumer prices (annual %)	FP.CPI.TOTL.ZG	Sudan	SDN	8.50585	7.19913	14.7543	14.2971	11.2568	12.9777	18.0966	35.5591	36.5223	36.9066	16.9096	17.7503	32.3516	63.2925	50.9941	163.258	359.093	138.808	..	..
Inflation, consumer prices (annual %)	FP.CPI.TOTL.ZG	Suriname	SUR	..	11.2813	6.42628	14.6671	-0.133637	6.94108	17.7118	5.00686	1.92344	3.38341	6.8939	55.4124	21.9969	..	..	34.8898	59.1197	52.446	51.5873	16.2296
Inflation, consumer prices (annual %)	FP.CPI.TOTL.ZG	Sweden	SWE	0.453171	1.36021	2.21217	3.43705	-0.494461	1.15799	2.96115	0.888378	-0.044293	-0.179638	-0.0467847	0.984269	1.7945	1.95354	1.78415	0.497367	2.1632	8.36929	8.54862	2.83582
Inflation, consumer prices (annual %)	FP.CPI.TOTL.ZG	Switzerland	CHE	1.17195	1.05951	0.732351	2.42604	-0.480482	0.688239	0.231349	-0.692552	-0.217323	-0.0132025	-1.14391	-0.434619	0.533788	0.936335	0.362886	-0.725875	0.581814	2.83503	2.1354	1.06234
Inflation, consumer prices (annual %)	FP.CPI.TOTL.ZG	Syrian Arab Republic	SYR	..	..	..	..	..	..	4.75316	36.7023	40.0318	10.9271	38.4611	47.7052	18.0753	0.940984	13.4176	..	..	..	..	..
Inflation, consumer prices (annual %)	FP.CPI.TOTL.ZG	Tajikistan	TJK	7.09193	10.0109	13.1491	20.4705	6.44823	6.44531	12.4315	5.83117	5.00965	6.10443	5.71456	6.00458	..	..	..	..	..	..	..	..
Inflation, consumer prices (annual %)	FP.CPI.TOTL.ZG	Tanzania	TZA	..	..	..	..	..	..	12.691	16.0011	7.87072	6.13161	5.58817	5.17477	5.31872	3.49446	3.46428	3.29029	3.69092	4.35027	3.79923	3.05695
Inflation, consumer prices (annual %)	FP.CPI.TOTL.ZG	Thailand	THA	..	..	..	..	..	..	3.80879	3.0149	2.18489	1.89514	-0.900425	0.18815	0.665632	1.0639	0.706729	-0.845937	1.2304	-1.61068	8.47805	1.36581
Inflation, consumer prices (annual %)	FP.CPI.TOTL.ZG	Timor-Leste	TLS	..	..	..	..	..	..	13.4998	11.8003	11.0849	0.726275	0.552796	-1.33854	0.557216	2.63647	0.958813	0.495499	3.69792	7.00531	8.42035	2.06284
Inflation, consumer prices (annual %)	FP.CPI.TOTL.ZG	Togo	TGO	6.78293	2.22898	0.945673	8.69483	3.71361	1.44595	3.56351	2.57718	1.82539	0.190875	2.585	1.28545	-0.98189	0.927755	0.674653	1.69928	4.18622	7.96757	5.48929	2.86262
Inflation, consumer prices (annual %)	FP.CPI.TOTL.ZG	Tonga	TON	..	6.14912	5.84225	10.447	1.42686	3.53491	6.27075	1.14754	0.775629	2.51088	-1.054	2.57816	7.51706	5.0321	1.17954	-0.349738	5.64051	10.9714	6.35113	3.18365
Inflation, consumer prices (annual %)	FP.CPI.TOTL.ZG	Trinidad and Tobago	TTO	6.87453	8.3296	7.89439	12.0303	6.97809	10.5492	5.10713	9.26028	5.19982	5.68442	4.66122	3.07067	1.88038	1.01857	1.00054	0.598986	2.05923	5.82839	4.6293	0.526885
Inflation, consumer prices (annual %)	FP.CPI.TOTL.ZG	Tunisia	TUN	..	3.22525	2.96694	4.34503	3.6649	3.33898	3.24003	4.61184	5.31624	4.62555	4.43737	3.6294	5.30885	7.30759	6.72008	5.63415	5.70635	8.30646	9.329	7.20662
Inflation, consumer prices (annual %)	FP.CPI.TOTL.ZG	Turkiye	TUR	8.17916	9.59724	8.75618	10.4441	6.25098	8.56644	6.47188	8.89157	7.49309	8.85457	7.67085	7.77513	11.1443	16.3325	15.1768	12.279	19.5965	72.3088	53.8594	58.5065
Inflation, consumer prices (annual %)	FP.CPI.TOTL.ZG	Turkmenistan	TKM	..	..	..	..	..	..	..	..	..	..	..	..	..	..	..	..	..	..	..	..
Inflation, consumer prices (annual %)	FP.CPI.TOTL.ZG	Turks and Caicos Islands	TCA	..	..	..	..	..	..	..	..	..	..	..	..	..	..	..	..	..	..	..	..
Inflation, consumer prices (annual %)	FP.CPI.TOTL.ZG	Tuvalu	TUV	..	..	..	..	..	..	0.500581	..	..	..	..	..	..	..	..	..	..	..	..	..
Inflation, consumer prices (annual %)	FP.CPI.TOTL.ZG	Uganda	UGA	..	..	..	..	..	..	16.5643	12.679	4.90521	3.07571	5.58969	5.70638	5.20972	2.61601	2.86759	3.31332	2.20457	7.19579	5.35095	3.32338
Inflation, consumer prices (annual %)	FP.CPI.TOTL.ZG	Ukraine	UKR	..	9.05252	12.8388	25.2265	15.8812	9.37293	7.95572	0.568728	-0.238949	12.0719	48.6999	13.9127	14.4383	10.9519	7.88672	2.73249	9.36314	20.1836	12.849	6.50198
Inflation, consumer prices (annual %)	FP.CPI.TOTL.ZG	United Arab Emirates	ARE	..	..	..	..	1.56181	0.877983	0.877347	0.662269	1.10112	2.34627	4.06997	1.61749	1.96683	3.06863	-1.93108	-2.0794	0.179935	5.29123	1.62671	1.66337
Inflation, consumer prices (annual %)	FP.CPI.TOTL.ZG	United Kingdom	GBR	2.08914	2.45566	2.38656	3.52141	1.96173	2.49265	3.85611	2.57323	2.29167	1.45112	0.368047	1.00842	2.55776	2.29284	1.7381	0.989487	2.51837	7.92205	6.79397	3.27157
Inflation, consumer prices (annual %)	FP.CPI.TOTL.ZG	United States	USA	3.39275	3.22594	2.85267	3.8391	-0.355546	1.64004	3.15684	2.06934	1.46483	1.62222	0.118627	1.26158	2.13011	2.44258	1.81221	1.23358	4.69786	8.0028	4.11634	2.94953
Inflation, consumer prices (annual %)	FP.CPI.TOTL.ZG	Uruguay	URY	..	6.39765	8.11465	7.87707	7.06222	6.69871	8.09283	8.09777	8.57514	8.87735	8.66627	9.63941	6.21809	7.60653	7.88199	9.75641	7.74791	9.10438	5.8691	4.84914
Inflation, consumer prices (annual %)	FP.CPI.TOTL.ZG	Uzbekistan	UZB	..	..	..	..	..	..	13.7797	13.2088	11.8414	9.28309	8.75188	8.13089	13.8757	17.5242	14.5257	12.8677	10.8492	11.4466	9.95659	9.62825
Inflation, consumer prices (annual %)	FP.CPI.TOTL.ZG	Vanuatu	VUT	1.1992	2.04082	3.93548	4.84171	4.29707	2.76269	0.873793	1.3474	1.45893	0.798864	2.48327	0.842069	3.08453	2.33096	2.76252	5.32935	2.34328	6.67931	11.1825	..
Inflation, consumer prices (annual %)	FP.CPI.TOTL.ZG	Venezuela, RB	VEN	..	..	..	..	..	..	26.0902	21.069	40.6394	62.1686	121.738	254.949	..	..	..	..	..	..	..	..
Inflation, consumer prices (annual %)	FP.CPI.TOTL.ZG	Viet Nam	VNM	8.28457	7.41802	8.34445	23.1154	6.71698	9.20747	18.6777	9.0947	6.59267	4.08455	0.631201	2.66825	3.52026	3.53963	2.79582	3.22093	1.83472	3.15651	3.25289	3.62109
Inflation, consumer prices (annual %)	FP.CPI.TOTL.ZG	Virgin Islands (U.S.)	VIR	..	..	..	..	..	..	..	..	..	..	..	..	..	..	..	..	..	..	..	..
Inflation, consumer prices (annual %)	FP.CPI.TOTL.ZG	West Bank and Gaza	PSE	4.10725	3.84234	1.85974	9.89	2.75393	3.74916	2.87724	2.77909	1.7244	1.73299	1.43161	-0.219107	0.212571	-0.195108	1.58018	-0.735332	1.23748	3.74122	5.8711	53.6691
Inflation, consumer prices (annual %)	FP.CPI.TOTL.ZG	Yemen, Rep.	YEM	..	..	..	..	..	..	19.5436	9.88539	10.9684	8.10473	..	..	..	..	..	..	..	..	..	..
Inflation, consumer prices (annual %)	FP.CPI.TOTL.ZG	Zambia	ZMB	..	..	..	..	..	..	6.4294	6.5759	6.97768	7.80688	10.1106	17.8697	6.57731	7.49457	9.15032	15.7331	22.0208	10.9932	10.8845	14.9856
Inflation, consumer prices (annual %)	FP.CPI.TOTL.ZG	Zimbabwe	ZWE	..	..	..	..	..	3.02267	3.46613	3.72533	1.63495	-0.197785	-2.43097	-1.54367	0.893962	10.6189	255.305	557.202	98.5461	104.705	..	..
Inflation, consumer prices (annual %)	FP.CPI.TOTL.ZG	Africa Eastern and Southern	AFE	..	..	..	12.6575	8.71893	4.50924	8.45987	8.93965	5.74883	5.37029	5.24588	6.5965	6.39934	4.7208	4.64497	5.40516	7.24098	10.7738	7.12697	4.42547
Inflation, consumer prices (annual %)	FP.CPI.TOTL.ZG	Africa Western and Central	AFW	..	..	5.36913	8.45298	4.415	2.20784	4.0187	4.57837	2.4392	1.76844	2.13082	1.48742	1.72549	1.78405	1.98309	2.49038	3.74557	7.93093	5.48929	3.61597
Inflation, consumer prices (annual %)	FP.CPI.TOTL.ZG	Arab World	ARB	..	..	..	..	..	..	4.63869	4.56354	3.27713	2.89948	2.55168	2.67659	2.17183	2.4572	1.09185	1.61222	2.96581	5.08754	3.64216	2.07655
Inflation, consumer prices (annual %)	FP.CPI.TOTL.ZG	Caribbean small states	CSS	3.60462	4.25195	4.48089	8.03327	0.00626357	3.37003	3.45675	2.50461	1.08324	1.14542	-0.852705	0.402622	1.6993	1.20716	1.00054	0.121435	2.22891	5.82839	4.47721	1.84256
Inflation, consumer prices (annual %)	FP.CPI.TOTL.ZG	Central Europe and the Baltics	CEB	3.1353	3.93033	4.83733	6.35866	2.7532	1.80117	4.13028	3.33492	1.4383	0.0538213	-0.464499	-0.0549995	2.07594	2.53445	2.66456	1.67244	3.83984	14.6081	9.44284	2.75761
Inflation, consumer prices (annual %)	FP.CPI.TOTL.ZG	Early-demographic dividend	EAR	..	5.81069	6.37288	10.447	4.53018	4.33298	5.79677	5.01245	4.79482	4.01862	3.129	3.52317	3.60248	3.97561	2.76252	2.96355	4.14968	7.19862	5.88586	3.30223
Inflation, consumer prices (annual %)	FP.CPI.TOTL.ZG	East Asia & Pacific	EAS	..	..	3.764	8.02627	1.77112	2.91834	4.86994	2.93432	2.51629	2.4994	0.79528	1.27699	1.80034	2.36855	1.70398	0.846906	2.4771	5.34595	5.21537	2.35563
Inflation, consumer prices (annual %)	FP.CPI.TOTL.ZG	East Asia & Pacific (excluding high income)	EAP	..	..	5.19692	10.3368	4.29707	3.53491	5.23542	3.02093	2.7673	2.82693	1.22393	1.91731	2.91264	3.19835	1.94258	2.40629	2.69892	5.37735	5.97803	2.68258
Inflation, consumer prices (annual %)	FP.CPI.TOTL.ZG	East Asia & Pacific (IDA & IBRD countries)	TEA	..	..	4.81677	10.447	3.71405	3.42431	5.08259	3.02093	2.91354	3.14299	1.08649	1.75711	2.88291	2.91741	1.93321	2.39316	2.61248	5.40874	6.16458	2.23173
Inflation, consumer prices (annual %)	FP.CPI.TOTL.ZG	Euro area	EMU	2.47212	2.72005	2.48232	4.11407	0.437175	1.52058	3.28801	2.54154	1.31023	0.220196	-0.0852072	0.16601	1.37504	1.68924	1.44124	0.186938	2.4865	8.47118	5.78432	2.18497
Inflation, consumer prices (annual %)	FP.CPI.TOTL.ZG	Europe & Central Asia	ECS	2.4877	3.21363	2.895	6.04251	1.30471	2.41891	3.85611	2.77334	1.73404	0.620491	0.368047	0.388838	1.91559	2.01322	1.76374	1.19998	3.19018	10.7806	7.44688	2.74955
Inflation, consumer prices (annual %)	FP.CPI.TOTL.ZG	Europe & Central Asia (excluding high income)	ECA	..	8.52531	9.7375	12.597	4.25895	6.77775	7.85833	3.31606	4.59788	3.06881	4.02769	2.13493	4.60357	2.56573	2.64328	2.74615	6.91757	13.8876	9.07365	3.48974
Inflation, consumer prices (annual %)	FP.CPI.TOTL.ZG	Europe & Central Asia (IDA & IBRD countries)	TEC	..	7.26159	8.75618	12.3487	3.79539	6.14255	7.66863	3.3735	3.38486	2.53188	3.86763	1.19887	3.13106	2.61122	2.67599	2.73249	5.10641	13.8876	9.40236	3.48974
Inflation, consumer prices (annual %)	FP.CPI.TOTL.ZG	European Union	EUU	2.45655	2.66631	2.51067	4.16497	0.839262	1.53112	3.28945	2.66284	1.21999	0.199344	-0.0616447	0.183335	1.42911	1.73861	1.63052	0.476499	2.55451	8.8337	6.29942	2.43531
Inflation, consumer prices (annual %)	FP.CPI.TOTL.ZG	Fragile and conflict affected situations	FCS	..	..	..	..	..	..	5.03378	5.4783	4.44648	2.43294	3.1691	3.78723	4.25104	3.21454	2.37759	2.93087	4.37148	7.00531	7.11459	4.42623
Inflation, consumer prices (annual %)	FP.CPI.TOTL.ZG	Heavily indebted poor countries (HIPC)	HPC	..	..	8.68057	14.152	4.415	4.82734	6.3811	6.01429	5.1619	3.96986	3.77407	4.66466	4.97595	3.06736	2.8027	3.48394	4.48088	9.57337	7.12697	4.53061
Inflation, consumer prices (annual %)	FP.CPI.TOTL.ZG	High income	HIC	2.60932	3.10767	2.7868	4.67145	1.43814	2.23149	3.41375	2.71012	1.50472	1.0412	0.330027	0.394769	1.58909	1.88111	1.6152	0.598986	2.51837	7.35165	4.83372	2.35166
Inflation, consumer prices (annual %)	FP.CPI.TOTL.ZG	IBRD only	IBD	..	6.55851	6.40656	9.99949	3.99895	4.15673	5.45497	4.21238	3.98471	3.58922	3.129	2.12082	3.32389	3.22703	2.58406	2.41513	4.27166	8.95774	6.07524	3.33675
Inflation, consumer prices (annual %)	FP.CPI.TOTL.ZG	IDA & IBRD total	IBT	..	6.14912	6.48708	10.2267	4.20252	4.03195	5.78925	4.61184	4.33894	3.51696	3.15783	2.81833	3.44637	3.19835	2.68537	2.91924	4.26021	8.48731	6.2744	3.60452
Inflation, consumer prices (annual %)	FP.CPI.TOTL.ZG	IDA blend	IDB	..	..	4.13491	7.40385	0.991103	3.25034	4.69316	4.17764	2.58117	1.2014	1.37489	1.65039	1.14765	2.48031	1.98959	2.11019	3.46678	6.32752	4.56458	3.46637
Inflation, consumer prices (annual %)	FP.CPI.TOTL.ZG	IDA only	IDX	..	..	8.01244	11.8037	4.62295	4.76312	6.4294	5.9413	5.00965	4.12924	3.55076	3.95889	4.4477	3.06736	2.86759	4.20179	4.48088	9.45801	7.12087	4.19082
Inflation, consumer prices (annual %)	FP.CPI.TOTL.ZG	IDA total	IDA	..	..	6.55723	11.0595	4.29707	3.73338	6.27075	5.32313	4.81507	3.47756	3.16346	3.37153	3.89252	2.9676	2.72643	3.48394	4.18622	8.06408	7.10221	3.92206
Inflation, consumer prices (annual %)	FP.CPI.TOTL.ZG	Late-demographic dividend	LTE	..	5.01773	6.60133	9.73228	3.04167	3.48251	4.37074	3.31606	2.6823	2.04461	1.55791	1.10921	2.17728	2.47446	2.16176	1.93694	3.49506	8.5182	6.19528	2.89855
Inflation, consumer prices (annual %)	FP.CPI.TOTL.ZG	Latin America & Caribbean	LCN	..	4.29342	6.14357	8.75868	2.40905	3.55438	5.04243	3.78181	2.52865	3.38341	1.86148	1.65039	2.19201	2.37952	2.37168	1.49389	3.87805	7.71368	4.78561	3.30223
Inflation, consumer prices (annual %)	FP.CPI.TOTL.ZG	Latin America & Caribbean (excluding high income)	LAC	4.08913	4.29342	6.42628	10.1548	2.59195	4.00812	5.79677	3.94666	2.74484	3.42826	3.14342	2.77316	3.36297	3.4025	2.50461	2.52664	4.27166	8.33371	5.08677	3.8354
Inflation, consumer prices (annual %)	FP.CPI.TOTL.ZG	Latin America & the Caribbean (IDA & IBRD countries)	TLA	3.98806	5.57775	6.42628	8.75868	2.59195	3.79644	5.79677	4.14457	2.74484	3.42826	2.92482	2.53782	2.82276	2.32414	2.09605	1.76752	4.26105	7.89628	4.92638	3.46497
Inflation, consumer prices (annual %)	FP.CPI.TOTL.ZG	Least developed countries: UN classification	LDC	..	..	..	..	4.68439	5.04968	6.3811	6.31474	5.58358	4.12924	3.55076	5.51353	4.77424	3.47797	3.32091	4.46414	4.18622	8.83128	7.12697	5.21364
Inflation, consumer prices (annual %)	FP.CPI.TOTL.ZG	Low & middle income	LMY	..	..	6.48708	10.3354	4.24979	4.15673	6.10743	5.00686	4.61475	3.52566	3.19377	3.01914	3.667	3.24057	2.7571	3.02272	4.25936	8.32008	6.20658	3.69663
Inflation, consumer prices (annual %)	FP.CPI.TOTL.ZG	Low income	LIC	..	..	..	..	..	..	6.79138	6.58776	5.61163	3.74053	4.37713	5.70638	8.15686	2.79181	2.83515	4.46414	5.1332	9.50612	7.12697	4.19082
Inflation, consumer prices (annual %)	FP.CPI.TOTL.ZG	Lower middle income	LMC	..	..	6.54788	11.4923	4.35603	4.60406	6.22011	5.9413	5.45858	5.08771	3.39402	3.52317	3.73888	4.17638	3.39342	4.92489	4.31528	7.65533	7.24879	4.60621
Inflation, consumer prices (annual %)	FP.CPI.TOTL.ZG	Middle East, North Africa, Afghanistan & Pakistan	MEA	..	..	..	..	2.75393	3.54407	4.63869	4.12322	3.27713	2.77352	1.81408	2.7075	2.06933	1.94579	1.33602	1.44704	2.86833	5.17981	4.22523	2.07655
Inflation, consumer prices (annual %)	FP.CPI.TOTL.ZG	Middle East, North Africa, Afghanistan & Pakistan (excluding high income)	MNA	..	..	..	..	1.97452	3.91106	5.0201	6.51134	5.07043	3.77124	2.52933	3.69726	4.64865	4.36615	2.65388	2.41513	5.21405	8.30646	6.09114	4.04611
Inflation, consumer prices (annual %)	FP.CPI.TOTL.ZG	Middle East, North Africa, Afghanistan & Pakistan (IDA & IBRD)	TMN	..	..	..	..	1.1951	3.94727	5.06871	6.58147	5.31624	4.62555	3.48335	3.76512	4.97595	4.46231	3.00539	3.73003	5.4602	8.78599	7.70666	3.08614
Inflation, consumer prices (annual %)	FP.CPI.TOTL.ZG	Middle income	MIC	..	5.81069	6.38972	10.2267	3.67595	4.0675	5.9521	4.5264	4.23624	3.52566	3.15783	2.73151	3.44637	3.46147	2.72643	2.74615	4.12082	8.28913	6.09852	3.60452
Inflation, consumer prices (annual %)	FP.CPI.TOTL.ZG	North America	NAC	2.80315	2.61398	2.49553	3.10469	-0.0280397	1.70846	3.03449	1.79251	1.20156	1.76443	0.621934	1.34517	1.8635	2.3554	1.88074	0.975292	4.04653	7.4028	3.99767	2.66555
Inflation, consumer prices (annual %)	FP.CPI.TOTL.ZG	Not classified	INX	..	..	..	..	..	..	..	..	..	..	..	..	..	..	..	..	..	..	..	..
Inflation, consumer prices (annual %)	FP.CPI.TOTL.ZG	OECD members	OED	2.47212	2.60015	2.4847	4.11407	1.10458	1.80735	3.3743	2.52946	1.45157	0.624517	0.338706	0.443258	1.82264	1.93247	1.74071	0.732852	2.81529	8.23803	5.67768	2.76589
Inflation, consumer prices (annual %)	FP.CPI.TOTL.ZG	Other small states	OSS	..	..	..	10.3624	2.51609	2.93236	4.23746	4.03932	2.7433	1.22741	1.02688	0.572606	2.07033	2.62385	1.37436	0.638545	2.44609	7.00531	5.09397	2.06284
Inflation, consumer prices (annual %)	FP.CPI.TOTL.ZG	Pacific island small states	PSS	..	..	3.764	11.0064	4.29707	2.76269	4.6747	1.69821	1.45893	0.798864	0.648243	1.07339	1.58394	2.89622	1.4072	0.386388	2.47788	6.09872	7.92165	..
Inflation, consumer prices (annual %)	FP.CPI.TOTL.ZG	Post-demographic dividend	PST	2.27716	2.45679	2.32003	4.11407	0.807015	1.90487	3.32985	2.48568	1.40858	0.906794	0.368047	0.607397	1.7308	1.73861	1.61963	0.632267	2.50835	7.87737	5.09397	2.44092
Inflation, consumer prices (annual %)	FP.CPI.TOTL.ZG	Pre-demographic dividend	PRE	..	..	..	..	..	..	6.4294	6.44121	4.76841	3.53437	3.55076	4.66466	4.97595	2.9676	2.4528	3.48394	4.25936	8.06408	7.10221	4.07857
Inflation, consumer prices (annual %)	FP.CPI.TOTL.ZG	Small states	SST	..	4.34088	4.48089	9.89926	2.08433	2.99937	4.23746	3.40013	1.60439	1.11296	0.562406	0.643389	1.75516	2.1097	1.17954	0.57679	2.41075	6.13441	5.07696	2.20209
Inflation, consumer prices (annual %)	FP.CPI.TOTL.ZG	South Asia	SAS	4.24634	5.79652	6.37288	9.90783	10.8824	9.3265	9.22708	9.45981	7.53041	6.82865	4.72756	4.45355	4.29109	3.3314	3.62895	5.66022	5.33853	7.17491	6.38195	2.76132
Inflation, consumer prices (annual %)	FP.CPI.TOTL.ZG	South Asia (IDA & IBRD)	TSA	4.24634	5.79652	6.37288	9.90783	10.8824	9.3265	9.22708	9.45981	7.53041	6.82865	4.72756	4.45355	4.29109	3.3314	3.62895	5.66022	5.33853	7.17491	6.38195	2.76132
Inflation, consumer prices (annual %)	FP.CPI.TOTL.ZG	Sub-Saharan Africa	SSF	..	..	..	10.7157	7.2381	4.28837	5.0461	6.5759	4.88516	4.40225	3.55076	5.43052	5.19795	4.09298	2.83515	3.48394	4.61875	8.83128	6.6976	4.21493
Inflation, consumer prices (annual %)	FP.CPI.TOTL.ZG	Sub-Saharan Africa (excluding high income)	SSA	..	..	..	9.90998	5.00627	4.28837	5.0461	6.31474	4.88516	4.40225	3.39402	5.43052	5.19795	4.09298	2.83515	3.48394	4.25936	8.83128	6.6976	4.21493
Inflation, consumer prices (annual %)	FP.CPI.TOTL.ZG	Sub-Saharan Africa (IDA & IBRD countries)	TSS	..	..	..	10.7157	7.2381	4.28837	5.0461	6.5759	4.88516	4.40225	3.55076	5.43052	5.19795	4.09298	2.83515	3.48394	4.61875	8.83128	6.6976	4.21493
Inflation, consumer prices (annual %)	FP.CPI.TOTL.ZG	Upper middle income	UMC	..	6.12557	6.17781	10.0662	2.55402	3.91106	5.67533	3.66627	2.70282	3.03373	2.24656	2.09057	3.30828	3.04505	1.84923	1.82894	4.05682	9.0383	5.0772	3.05252
Inflation, consumer prices (annual %)	FP.CPI.TOTL.ZG	World	WLD	..	3.84234	4.82705	8.69483	2.46257	3.21283	4.79588	3.67592	2.62105	2.35449	1.45069	1.60554	2.25428	2.44989	2.21678	1.91984	3.48388	7.93093	5.8711	2.94953
Official exchange rate (LCU per US$, period average)	PA.NUS.FCRF	Afghanistan	AFG	49.4946	49.9253	49.962	50.2496	50.325	46.4525	46.747	50.9214	55.3775	57.2475	61.1435	67.8661	68.0269	72.0832	77.7379	76.8135	..	..	..	..
Official exchange rate (LCU per US$, period average)	PA.NUS.FCRF	Albania	ALB	99.8703	98.1034	90.4279	83.8946	94.9781	103.937	100.896	108.184	105.669	105.48	125.962	124.142	119.1	107.989	109.851	108.65	103.52	113.042	100.645	93.1233
Official exchange rate (LCU per US$, period average)	PA.NUS.FCRF	Algeria	DZA	73.2763	72.6466	69.2924	64.5828	72.6474	74.386	72.9379	77.536	79.3684	80.579	100.691	109.443	110.973	116.594	119.354	126.777	135.064	141.995	135.843	134.053
Official exchange rate (LCU per US$, period average)	PA.NUS.FCRF	American Samoa	ASM	1	1	1	1	1	1	1	1	1	1	1	1	1	1	1	1	1	1	1	1
Official exchange rate (LCU per US$, period average)	PA.NUS.FCRF	Andorra	AND	..	..	..	..	..	..	..	..	..	..	..	..	..	..	..	..	0.845377	0.950916	0.92471	0.924367
Official exchange rate (LCU per US$, period average)	PA.NUS.FCRF	Angola	AGO	87.1591	80.3681	76.7061	75.0334	79.3282	91.9057	93.9348	95.468	96.5183	98.3024	120.061	163.656	165.916	252.856	364.826	578.259	631.442	460.568	685.02	869.846
Official exchange rate (LCU per US$, period average)	PA.NUS.FCRF	Antigua and Barbuda	ATG	2.7	2.7	2.7	2.7	2.7	2.7	2.7	2.7	2.7	2.7	2.7	2.7	2.7	2.7	2.7	2.7	2.7	2.7	2.7	2.7
Official exchange rate (LCU per US$, period average)	PA.NUS.FCRF	Argentina	ARG	2.90366	3.05431	3.09565	3.14416	3.71011	3.8963	4.11014	4.53693	5.45935	8.07528	9.23319	14.7582	16.5627	28.095	48.1479	70.5392	94.9907	130.617	296.258	914.695
Official exchange rate (LCU per US$, period average)	PA.NUS.FCRF	Armenia	ARM	457.687	416.04	342.079	305.969	363.283	373.66	372.501	401.764	409.626	415.92	477.918	480.488	482.716	482.988	480.445	489.009	503.77	435.666	392.476	392.73
Official exchange rate (LCU per US$, period average)	PA.NUS.FCRF	Aruba	ABW	1.79	1.79	1.79	1.79	1.79	1.79	1.79	1.79	1.79	1.79	1.79	1.79	1.79	1.79	1.79	1.79	1.79	1.79	1.79	1.79
Official exchange rate (LCU per US$, period average)	PA.NUS.FCRF	Australia	AUS	1.30947	1.32797	1.19507	1.19218	1.28219	1.09016	0.969463	0.965801	1.03584	1.10936	1.33109	1.34521	1.30476	1.33841	1.43851	1.45309	1.33122	1.44166	1.50519	1.51536
Official exchange rate (LCU per US$, period average)	PA.NUS.FCRF	Austria	AUT	0.8038	0.796433	0.729672	0.679923	0.716958	0.754309	0.718414	0.778338	0.752945	0.752728	0.901296	0.903421	0.885206	0.846773	0.893276	0.875506	0.845494	0.949624	0.92484	0.92389
Official exchange rate (LCU per US$, period average)	PA.NUS.FCRF	Azerbaijan	AZE	0.945421	0.893445	0.858124	0.82162	0.803783	0.80265	0.789686	0.785645	0.784541	0.784347	1.02456	1.59572	1.72115	1.70002	1.7	1.7	1.7	1.7	1.7	1.7
Official exchange rate (LCU per US$, period average)	PA.NUS.FCRF	Bahamas, The	BHS	1	1	1	1	1	1	1	1	1	1	1	1	1	1	1	1	1	1	1	1
Official exchange rate (LCU per US$, period average)	PA.NUS.FCRF	Bahrain	BHR	0.376	0.376	0.376	0.376	0.376	0.376	0.376	0.376	0.376	0.376	0.376	0.376	0.376	0.376	0.376	0.376	0.376	0.376	0.376	0.376
Official exchange rate (LCU per US$, period average)	PA.NUS.FCRF	Bangladesh	BGD	64.3275	68.9332	68.8749	68.5983	69.0391	69.6493	74.1524	81.8627	78.1032	77.6414	77.9469	78.4681	80.4375	83.4662	84.4535	84.8714	85.0838	91.7455	106.309	115.604
Official exchange rate (LCU per US$, period average)	PA.NUS.FCRF	Barbados	BRB	2	2	2	2	2	2	2	2	2	2	2	2	2	2	2	2	2	2	2	2
Official exchange rate (LCU per US$, period average)	PA.NUS.FCRF	Belarus	BLR	0.215382	0.214456	0.214608	0.21364	0.279305	0.297851	0.497463	0.83369	0.888005	1.02241	1.5926	1.98956	1.93234	2.03761	2.09178	2.43958	2.53868	2.6261	3.00735	3.24619
Official exchange rate (LCU per US$, period average)	PA.NUS.FCRF	Belgium	BEL	0.8038	0.796433	0.729672	0.679923	0.716958	0.754309	0.718414	0.778338	0.752945	0.752728	0.901296	0.903421	0.885206	0.846773	0.893276	0.875506	0.845494	0.949624	0.92484	0.92389
Official exchange rate (LCU per US$, period average)	PA.NUS.FCRF	Belize	BLZ	2	2	2	2	2	2	2	2	2	2	2	2	2	2	2	2	2	2	2	2
Official exchange rate (LCU per US$, period average)	PA.NUS.FCRF	Benin	BEN	527.258	522.426	478.634	446	470.293	494.794	471.249	510.556	493.9	493.757	591.212	592.606	580.657	555.446	585.951	574.295	554.608	622.912	606.655	606.345
Official exchange rate (LCU per US$, period average)	PA.NUS.FCRF	Bermuda	BMU	1	1	1	1	1	1	1	1	1	1	1	1	1	1	1	1	1	1	1	1
Official exchange rate (LCU per US$, period average)	PA.NUS.FCRF	Bhutan	BTN	44.1	45.307	41.3485	43.5052	48.4053	45.7258	46.6705	53.4372	58.5978	61.0295	64.1519	67.1953	65.1216	68.3895	70.4203	74.0996	73.918	78.6045	82.5993	83.6693
Official exchange rate (LCU per US$, period average)	PA.NUS.FCRF	Bolivia	BOL	8.06606	8.01162	7.85125	7.23832	7.02	7.01667	6.93696	6.91	6.91	6.91	6.91	6.91	6.91	6.91	6.91	6.91	6.91	6.91	6.91	6.91
Official exchange rate (LCU per US$, period average)	PA.NUS.FCRF	Bosnia and Herzegovina	BIH	1.57272	1.55907	1.429	1.3352	1.40789	1.47674	1.40694	1.52221	1.47305	1.47417	1.76349	1.76814	1.73535	1.65699	1.74709	1.71697	1.65361	1.85933	1.8092	1.80756
Official exchange rate (LCU per US$, period average)	PA.NUS.FCRF	Botswana	BWA	5.11675	5.8303	6.13941	6.82686	7.15514	6.79362	6.83823	7.64053	8.39891	8.97608	10.129	10.9012	10.3474	10.2	10.7559	11.4562	11.0873	12.3688	13.5964	13.5631
Official exchange rate (LCU per US$, period average)	PA.NUS.FCRF	Brazil	BRA	2.43439	2.17533	1.94706	1.83377	1.99943	1.75923	1.67283	1.95307	2.15609	2.35295	3.3269	3.49131	3.19139	3.65383	3.94447	5.15518	5.3944	5.16397	4.99438	5.38893
Official exchange rate (LCU per US$, period average)	PA.NUS.FCRF	British Virgin Islands	VGB	..	..	..	..	..	..	..	..	..	..	..	..	..	..	..	..	..	..	..	..
Official exchange rate (LCU per US$, period average)	PA.NUS.FCRF	Brunei Darussalam	BRN	1.6644	1.58893	1.5071	1.41717	1.45457	1.36351	1.25791	1.24957	1.25117	1.26704	1.37491	1.38135	1.38089	1.34892	1.36422	1.3797	1.34381	1.37896	1.34308	1.33603
Official exchange rate (LCU per US$, period average)	PA.NUS.FCRF	Bulgaria	BGR	1.57413	1.55927	1.42905	1.33712	1.40669	1.47739	1.40646	1.52205	1.47357	1.47418	1.7644	1.76804	1.73546	1.65704	1.74704	1.71633	1.65377	1.86014	1.80897	1.80784
Official exchange rate (LCU per US$, period average)	PA.NUS.FCRF	Burkina Faso	BFA	527.258	522.426	478.634	446	470.293	494.794	471.249	510.556	493.9	493.757	591.212	592.606	580.657	555.446	585.911	575.586	554.531	623.76	606.57	606.345
Official exchange rate (LCU per US$, period average)	PA.NUS.FCRF	Burundi	BDI	1081.58	1028.68	1081.87	1185.69	1230.18	1230.75	1261.07	1442.51	1555.09	1546.69	1571.9	1654.63	1729.06	1782.88	1845.62	1915.05	1975.95	2034.31	2574.05	..
Official exchange rate (LCU per US$, period average)	PA.NUS.FCRF	Cabo Verde	CPV	88.6462	87.9261	80.615	75.336	80.0354	83.2787	79.2769	86.319	83.0725	83.0345	99.3857	99.6881	97.8069	93.4136	98.4952	96.7957	93.2181	104.863	101.805	101.922
Official exchange rate (LCU per US$, period average)	PA.NUS.FCRF	Cambodia	KHM	4092.5	4103.25	4056.17	4054.17	4139.33	4184.92	4058.5	4033	4027.25	4037.5	4067.75	4058.69	4050.58	4051.17	4061.15	4092.78	4098.72	4102.04	4110.65	4072.4
Official exchange rate (LCU per US$, period average)	PA.NUS.FCRF	Cameroon	CMR	527.258	522.426	478.634	446	470.293	494.794	471.249	510.556	493.9	493.757	591.212	592.606	580.657	555.446	585.911	575.586	554.531	623.76	606.57	606.345
Official exchange rate (LCU per US$, period average)	PA.NUS.FCRF	Canada	CAN	1.21141	1.13434	1.07405	1.06709	1.14154	1.03011	0.989258	0.999365	1.03014	1.10475	1.27879	1.32562	1.29794	1.29582	1.32679	1.34115	1.25388	1.30155	1.34991	1.36936
Official exchange rate (LCU per US$, period average)	PA.NUS.FCRF	Cayman Islands	CYM	0.83333	0.83333	0.83333	0.83333	0.83333	0.83333	0.83333	0.83333	0.83333	0.83333	0.83333	0.83333	0.83333	0.83333	0.83333	0.83333	0.83333	0.83333	0.83333	0.83333
Official exchange rate (LCU per US$, period average)	PA.NUS.FCRF	Central African Republic	CAF	527.258	522.426	478.634	446	470.293	494.794	471.249	510.556	493.9	493.757	591.212	592.606	580.657	555.446	585.911	575.586	554.531	623.76	606.57	606.345
Official exchange rate (LCU per US$, period average)	PA.NUS.FCRF	Chad	TCD	527.258	522.426	478.634	446	470.293	494.794	471.249	510.556	493.9	493.757	591.212	592.606	580.657	555.446	585.911	575.586	554.531	623.76	606.57	606.345
Official exchange rate (LCU per US$, period average)	PA.NUS.FCRF	Channel Islands	CHI	0.549998	0.543487	0.499772	0.543966	0.641919	0.647179	0.624141	0.633047	0.639661	0.60773	0.654545	0.740634	0.776977	0.749532	0.783445	0.78	0.727065	0.811302	0.804539	0.782415
Official exchange rate (LCU per US$, period average)	PA.NUS.FCRF	Chile	CHL	559.768	530.275	522.464	522.461	560.86	510.249	483.668	486.471	495.273	570.348	654.124	676.958	648.834	641.277	702.897	792.727	758.955	873.314	840.067	943.572
Official exchange rate (LCU per US$, period average)	PA.NUS.FCRF	China	CHN	8.19432	7.97344	7.60753	6.94865	6.83142	6.77027	6.46146	6.31233	6.19576	6.14343	6.22749	6.64448	6.75876	6.61596	6.90839	6.90077	6.44898	6.73716	7.084	7.19749
Official exchange rate (LCU per US$, period average)	PA.NUS.FCRF	Colombia	COL	2321.13	2358.59	2077.81	1965.14	2157.6	1899	1848.02	1798.01	1868.89	2001.11	2741.78	3055.26	2951.49	2955.7	3281.62	3693.28	3744.24	4256.19	4325.95	4074.43
Official exchange rate (LCU per US$, period average)	PA.NUS.FCRF	Comoros	COM	395.444	391.819	358.975	334.5	352.72	371.096	353.436	382.917	370.425	370.318	443.409	444.454	435.493	416.585	439.463	430.721	415.956	467.184	454.991	454.524
Official exchange rate (LCU per US$, period average)	PA.NUS.FCRF	Congo, Dem. Rep.	COD	473.908	468.279	516.75	559.293	809.786	905.913	919.491	919.755	919.566	925.226	925.985	1010.3	1464.42	1622.52	1647.76	1851.12	1989.39	2006.71	2340.04	..
Official exchange rate (LCU per US$, period average)	PA.NUS.FCRF	Congo, Rep.	COG	527.258	522.426	478.634	446	470.293	494.794	471.249	510.556	493.9	493.757	591.212	592.606	580.657	555.446	585.911	575.586	554.531	623.76	606.57	606.345
Official exchange rate (LCU per US$, period average)	PA.NUS.FCRF	Costa Rica	CRI	477.787	511.302	516.617	526.236	573.288	525.829	505.664	502.901	499.767	538.317	534.566	544.739	567.513	576.973	587.295	584.901	620.785	647.136	544.051	515.11
Official exchange rate (LCU per US$, period average)	PA.NUS.FCRF	Cote d'Ivoire	CIV	527.258	522.426	478.634	446	470.293	494.794	471.249	510.556	493.9	493.757	591.212	592.606	580.657	555.446	585.911	575.586	554.531	623.76	606.57	606.345
Official exchange rate (LCU per US$, period average)	PA.NUS.FCRF	Croatia	HRV	5.94924	5.83779	5.36454	4.93504	5.28395	5.49801	5.34387	5.85029	5.70488	5.74817	6.8583	6.80599	6.62383	6.27903	6.62255	6.61406	6.36008	7.15974	0.92484	0.92389
Official exchange rate (LCU per US$, period average)	PA.NUS.FCRF	Cuba	CUB	..	..	..	..	..	..	..	..	..	..	..	..	..	..	..	..	..	..	..	..
Official exchange rate (LCU per US$, period average)	PA.NUS.FCRF	Curacao	CUW	..	..	..	..	..	..	1.79	1.79	1.79	1.79	1.79	1.79	1.79	1.79	1.79	1.79	1.79	1.79	1.79	1.79
Official exchange rate (LCU per US$, period average)	PA.NUS.FCRF	Cyprus	CYP	0.464071	0.458916	0.426125	0.679923	0.716958	0.754309	0.718414	0.778338	0.752945	0.752728	0.901296	0.903421	0.885206	0.846773	0.893276	0.875506	0.845494	0.949624	0.92484	0.92389
Official exchange rate (LCU per US$, period average)	PA.NUS.FCRF	Czechia	CZE	23.9574	22.5956	20.2937	17.0717	19.063	19.0983	17.6959	19.5775	19.5706	20.7575	24.5987	24.4399	23.3763	21.7299	22.9322	23.2102	21.6782	23.357	22.1981	23.2168
Official exchange rate (LCU per US$, period average)	PA.NUS.FCRF	Denmark	DNK	5.99691	5.94678	5.4437	5.09813	5.36087	5.62408	5.36871	5.79248	5.61631	5.61247	6.72791	6.73172	6.60289	6.31462	6.66945	6.54215	6.28711	7.07615	6.8897	6.89448
Official exchange rate (LCU per US$, period average)	PA.NUS.FCRF	Djibouti	DJI	177.721	177.721	177.721	177.721	177.721	177.721	177.721	177.721	177.721	177.721	177.721	177.721	177.721	177.721	177.721	177.721	177.721	177.721	177.721	177.721
Official exchange rate (LCU per US$, period average)	PA.NUS.FCRF	Dominica	DMA	2.7	2.7	2.7	2.7	2.7	2.7	2.7	2.7	2.7	2.7	2.7	2.7	2.7	2.7	2.7	2.7	2.7	2.7	2.7	2.7
Official exchange rate (LCU per US$, period average)	PA.NUS.FCRF	Dominican Republic	DOM	30.2828	33.3	33.1719	34.5294	35.9719	36.8213	38.0876	39.3203	41.7945	43.5497	45.0455	46.0644	47.5344	49.51	51.2949	56.5245	57.2211	55.141	56.1576	59.5651
Official exchange rate (LCU per US$, period average)	PA.NUS.FCRF	Ecuador	ECU	1	1	1	1	1	1	1	1	1	1	1	1	1	1	1	1	1	1	1	1
Official exchange rate (LCU per US$, period average)	PA.NUS.FCRF	Egypt, Arab Rep.	EGY	5.77883	5.73317	5.63543	5.4325	5.54455	5.62194	5.93283	6.05606	6.87032	7.07761	7.69126	10.0254	17.7825	17.7673	16.7706	15.7592	15.6445	19.1604	30.6264	45.2993
Official exchange rate (LCU per US$, period average)	PA.NUS.FCRF	El Salvador	SLV	1	1	1	1	1	1	1	1	1	1	1	1	1	1	1	1	1	1	1	1
Official exchange rate (LCU per US$, period average)	PA.NUS.FCRF	Equatorial Guinea	GNQ	527.258	522.426	478.634	446	470.293	494.794	471.249	510.556	493.9	493.757	591.212	592.606	580.657	555.446	585.911	575.586	554.531	623.76	606.57	606.345
Official exchange rate (LCU per US$, period average)	PA.NUS.FCRF	Eritrea	ERI	15.3679	15.375	15.375	15.375	15.375	15.375	15.375	15.375	15.375	15.375	15.375	15.35	15.075	15.075	15.075	15.075	15.075	15.075	15.075	15.075
Official exchange rate (LCU per US$, period average)	PA.NUS.FCRF	Estonia	EST	12.5838	12.4655	11.4339	10.6944	11.2574	11.8068	0.718414	0.778338	0.752945	0.752728	0.901296	0.903421	0.885206	0.846773	0.893276	0.875506	0.845494	0.949624	0.92484	0.92389
Official exchange rate (LCU per US$, period average)	PA.NUS.FCRF	Eswatini	SWZ	6.35933	6.77155	7.04537	8.26122	8.47367	7.32122	7.26113	8.20997	9.65506	10.8527	12.7589	14.7096	13.3238	13.2339	14.4518	16.4703	14.7834	16.3623	18.4536	18.3177
Official exchange rate (LCU per US$, period average)	PA.NUS.FCRF	Ethiopia	ETH	8.66644	8.69862	8.96595	9.59974	11.7776	14.4096	16.8992	17.7048	18.6266	19.5858	20.5768	21.7315	23.8661	27.4294	29.0697	34.9272	43.7338	51.7562	54.6009	..
Official exchange rate (LCU per US$, period average)	PA.NUS.FCRF	Faroe Islands	FRO	5.99691	5.94678	5.4437	5.09813	5.36087	5.62408	5.36871	5.79248	5.61631	5.61247	6.72791	6.73172	6.60289	6.31462	6.66945	6.54215	6.28711	7.07615	6.8897	6.89448
Official exchange rate (LCU per US$, period average)	PA.NUS.FCRF	Fiji	FJI	1.69105	1.73126	1.61041	1.59403	1.9581	1.91851	1.79088	1.78989	1.84148	1.88735	2.09763	2.0947	2.06688	2.08738	2.16039	2.1688	2.07063	2.20141	2.25013	2.2683
Official exchange rate (LCU per US$, period average)	PA.NUS.FCRF	Finland	FIN	0.8038	0.796433	0.729672	0.679923	0.716958	0.754309	0.718414	0.778338	0.752945	0.752728	0.901296	0.903421	0.885206	0.846773	0.893276	0.875506	0.845494	0.949624	0.92484	0.92389
Official exchange rate (LCU per US$, period average)	PA.NUS.FCRF	France	FRA	0.8038	0.796433	0.729672	0.679923	0.716958	0.754309	0.718414	0.778338	0.752945	0.752728	0.901296	0.903421	0.885206	0.846773	0.893276	0.875506	0.845494	0.949624	0.92484	0.92389
Official exchange rate (LCU per US$, period average)	PA.NUS.FCRF	French Polynesia	PYF	95.9188	95.0397	87.073	81.1363	85.5558	90.013	85.7296	92.8804	89.8502	89.8243	107.553	107.807	105.633	101.047	106.589	104.711	100.88	113.474	110.347	110.306
Official exchange rate (LCU per US$, period average)	PA.NUS.FCRF	Gabon	GAB	527.258	522.426	478.634	446	470.293	494.794	471.249	510.556	493.9	493.757	591.212	592.606	580.657	555.446	585.911	575.586	554.531	623.76	606.57	606.345
Official exchange rate (LCU per US$, period average)	PA.NUS.FCRF	Gambia, The	GMB	28.5754	28.0657	24.8734	22.1924	26.6444	28.012	29.4615	32.0771	35.9576	41.733	42.5062	43.3725	46.6089	48.1518	50.0625	51.5017	51.4844	54.9235	61.0963	67.6612
Official exchange rate (LCU per US$, period average)	PA.NUS.FCRF	Georgia	GEO	1.81268	1.78043	1.67049	1.49079	1.67049	1.78234	1.6865	1.65126	1.66335	1.76567	2.26934	2.36673	2.50954	2.53411	2.81814	3.10902	3.22156	2.9162	2.62796	2.72062
Official exchange rate (LCU per US$, period average)	PA.NUS.FCRF	Germany	DEU	0.8038	0.796433	0.729672	0.679923	0.716958	0.754309	0.718414	0.778338	0.752945	0.752728	0.901296	0.903421	0.885206	0.846773	0.893276	0.875506	0.845494	0.949624	0.92484	0.92389
Official exchange rate (LCU per US$, period average)	PA.NUS.FCRF	Ghana	GHA	0.905209	0.915107	0.932619	1.05228	1.40497	1.42998	1.52062	1.82487	1.98135	2.89657	3.71464	3.90982	4.35053	4.58533	5.21737	5.59571	5.8057	8.2724	11.0204	..
Official exchange rate (LCU per US$, period average)	PA.NUS.FCRF	Gibraltar	GIB	0.549998	0.543487	0.499772	0.543966	0.641919	0.647179	0.624141	0.633047	0.639661	0.60773	0.654545	0.740634	0.776977	0.749532	0.783445	0.78	0.727065	0.811302	0.804539	0.782415
Official exchange rate (LCU per US$, period average)	PA.NUS.FCRF	Greece	GRC	0.8038	0.796433	0.729672	0.679923	0.716958	0.754309	0.718414	0.778338	0.752945	0.752728	0.901296	0.903421	0.885206	0.846773	0.893276	0.875506	0.845494	0.949624	0.92484	0.92389
Official exchange rate (LCU per US$, period average)	PA.NUS.FCRF	Greenland	GRL	5.99691	5.94678	5.4437	5.09813	5.36087	5.62408	5.36871	5.79248	5.61631	5.61247	6.72791	6.73172	6.60289	6.31462	6.66945	6.54215	6.28711	7.07615	6.8897	6.89448
Official exchange rate (LCU per US$, period average)	PA.NUS.FCRF	Grenada	GRD	2.7	2.7	2.7	2.7	2.7	2.7	2.7	2.7	2.7	2.7	2.7	2.7	2.7	2.7	2.7	2.7	2.7	2.7	2.7	2.7
Official exchange rate (LCU per US$, period average)	PA.NUS.FCRF	Guam	GUM	1	1	1	1	1	1	1	1	1	1	1	1	1	1	1	1	1	1	1	1
Official exchange rate (LCU per US$, period average)	PA.NUS.FCRF	Guatemala	GTM	7.63394	7.60263	7.6733	7.56003	8.16156	8.05777	7.78542	7.83361	7.85681	7.73223	7.65482	7.59994	7.34794	7.51916	7.6967	7.72165	7.73439	7.74824	7.83197	7.75854
Official exchange rate (LCU per US$, period average)	PA.NUS.FCRF	Guinea	GIN	3644.33	5148.75	4197.75	4601.69	4801.08	5726.07	6658.03	6985.83	6907.88	7014.12	7485.52	8967.93	9088.32	9011.13	9183.88	9565.08	..	..	..	..
Official exchange rate (LCU per US$, period average)	PA.NUS.FCRF	Guinea-Bissau	GNB	527.258	522.426	478.634	446	470.293	494.794	471.249	510.556	493.9	493.757	591.212	592.606	580.657	555.446	585.911	575.586	554.531	623.76	606.57	606.345
Official exchange rate (LCU per US$, period average)	PA.NUS.FCRF	Guyana	GUY	199.875	200.188	202.347	203.633	203.95	203.636	204.018	204.358	205.394	206.449	206.5	206.5	206.5	207.717	208.5	208.5	208.5	208.5	208.5	208.5
Official exchange rate (LCU per US$, period average)	PA.NUS.FCRF	Haiti	HTI	40.4485	40.4085	36.8614	39.1076	41.1976	39.7974	40.5228	41.9497	43.4628	45.216	50.7064	63.3358	64.7697	68.0318	88.815	93.5098	89.2266	115.631	141.036	131.811
Official exchange rate (LCU per US$, period average)	PA.NUS.FCRF	Honduras	HND	18.8323	18.8952	18.8951	18.9038	18.8951	18.8951	18.9171	19.5022	20.3538	20.9872	21.9452	22.835	23.4871	23.9027	24.5085	24.5819	24.0167	24.4859	24.6016	24.7993
Official exchange rate (LCU per US$, period average)	PA.NUS.FCRF	Hong Kong SAR, China	HKG	7.77733	7.76783	7.80142	7.78683	7.75175	7.76917	7.784	7.75642	7.756	7.75408	7.75175	7.76225	7.79325	7.8385	7.83592	7.75725	7.77325	7.83142	7.82958	7.80383
Official exchange rate (LCU per US$, period average)	PA.NUS.FCRF	Hungary	HUN	199.583	210.39	183.626	172.113	202.342	207.944	201.055	225.104	223.695	232.602	279.332	281.523	274.433	270.212	290.66	307.997	303.141	372.596	353.088	365.691
Official exchange rate (LCU per US$, period average)	PA.NUS.FCRF	Iceland	ISL	62.9817	70.18	64.055	87.9479	123.638	122.242	115.954	125.083	122.179	116.767	131.919	120.812	106.84	108.3	122.607	135.422	126.989	135.28	137.943	137.958
Official exchange rate (LCU per US$, period average)	PA.NUS.FCRF	India	IND	44.1	45.307	41.3485	43.5052	48.4053	45.7258	46.6705	53.4372	58.5978	61.0295	64.1519	67.1953	65.1216	68.3895	70.4203	74.0996	73.918	78.6045	82.5993	83.6693
Official exchange rate (LCU per US$, period average)	PA.NUS.FCRF	Indonesia	IDN	9704.74	9159.32	9141	9698.96	10389.9	9090.43	8770.43	9386.63	10461.2	11865.2	13389.4	13308.3	13380.8	14236.9	14147.7	14582.2	14308.1	14849.9	15236.9	15855.4
Official exchange rate (LCU per US$, period average)	PA.NUS.FCRF	Iran, Islamic Rep.	IRN	8963.96	9170.94	9281.15	9428.53	9864.3	10254.2	10616.3	12175.5	18414.4	25941.7	29011.5	30914.9	33226.3	40864.3	42000	42000	42000	42000	42000	..
Official exchange rate (LCU per US$, period average)	PA.NUS.FCRF	Iraq	IRQ	1472	1467.42	1254.57	1193.08	1170	1170	1170	1166.17	1166	1166	1167.33	1182	1184	1182.75	1182	1192	1450	1450	1312.5	1300
Official exchange rate (LCU per US$, period average)	PA.NUS.FCRF	Ireland	IRL	0.8038	0.796433	0.729672	0.679923	0.716958	0.754309	0.718414	0.778338	0.752945	0.752728	0.901296	0.903421	0.885206	0.846773	0.893276	0.875506	0.845494	0.949624	0.92484	0.92389
Official exchange rate (LCU per US$, period average)	PA.NUS.FCRF	Isle of Man	IMN	0.549998	0.543487	0.499772	0.543966	0.641919	0.647179	0.624141	0.633047	0.639661	0.60773	0.654545	0.740634	0.776977	0.749532	0.783445	0.78	0.727065	0.811302	0.804539	0.782415
Official exchange rate (LCU per US$, period average)	PA.NUS.FCRF	Israel	ISR	4.4877	4.45581	4.10808	3.58802	3.93234	3.73897	3.57813	3.85592	3.61076	3.57793	3.88683	3.84057	3.59956	3.59056	3.56453	3.44241	3.2302	3.35961	3.66737	3.69972
Official exchange rate (LCU per US$, period average)	PA.NUS.FCRF	Italy	ITA	0.8038	0.796433	0.729672	0.679923	0.716958	0.754309	0.718414	0.778338	0.752945	0.752728	0.901296	0.903421	0.885206	0.846773	0.893276	0.875506	0.845494	0.949624	0.92484	0.92389
Official exchange rate (LCU per US$, period average)	PA.NUS.FCRF	Jamaica	JAM	62.2807	65.7439	69.1922	72.7562	87.8941	87.1961	85.8935	88.7498	100.398	110.935	116.97	125.095	127.965	128.872	133.312	142.403	150.79	153.427	154.159	156.44
Official exchange rate (LCU per US$, period average)	PA.NUS.FCRF	Japan	JPN	110.218	116.299	117.754	103.359	93.5701	87.7799	79.807	79.7905	97.5957	105.945	121.044	108.793	112.166	110.423	109.01	106.775	109.754	131.498	140.491	151.366
Official exchange rate (LCU per US$, period average)	PA.NUS.FCRF	Jordan	JOR	0.709	0.709	0.709	0.709667	0.71	0.71	0.71	0.71	0.71	0.71	0.71	0.71	0.71	0.71	0.71	0.71	0.71	0.71	0.71	0.71
Official exchange rate (LCU per US$, period average)	PA.NUS.FCRF	Kazakhstan	KAZ	132.88	126.089	122.554	120.299	147.497	147.355	146.621	149.113	152.129	179.192	221.728	342.16	326.001	344.706	382.747	412.953	425.908	460.165	456.165	468.962
Official exchange rate (LCU per US$, period average)	PA.NUS.FCRF	Kenya	KEN	75.5541	72.1008	67.3176	69.1753	77.352	79.2332	88.8108	84.5296	86.1229	87.9222	98.1785	101.504	103.41	101.302	101.991	106.451	109.638	117.866	139.846	134.822
Official exchange rate (LCU per US$, period average)	PA.NUS.FCRF	Kiribati	KIR	1.30947	1.32797	1.19507	1.19218	1.28219	1.09016	0.969463	0.965801	1.03584	1.10936	1.33109	1.34521	1.30476	1.33841	1.43851	1.45309	1.33122	1.44166	1.50519	1.51536
Official exchange rate (LCU per US$, period average)	PA.NUS.FCRF	Korea, Dem. People's Rep.	PRK	..	..	..	..	..	..	..	..	..	..	..	..	..	..	..	..	..	..	..	..
Official exchange rate (LCU per US$, period average)	PA.NUS.FCRF	Korea, Rep.	KOR	1024.33	955.341	929.376	1100.13	1277.25	1156.46	1108.23	1126.81	1094.98	1052.84	1130.95	1160.77	1131	1100.16	1165.36	1180.27	1143.95	1291.45	1305.66	1363.38
Official exchange rate (LCU per US$, period average)	PA.NUS.FCRF	Kosovo	XKX	0.8038	0.796433	0.729672	0.679923	0.716958	0.754309	0.718414	0.778338	0.752945	0.752728	0.901296	0.903421	0.885206	0.846773	0.893216	0.877475	0.845377	0.950916	0.92471	0.924367
Official exchange rate (LCU per US$, period average)	PA.NUS.FCRF	Kuwait	KWT	0.292	0.290176	0.284214	0.268828	0.287785	0.286607	0.275979	0.279936	0.283589	0.284567	0.300852	0.302137	0.30335	0.301956	0.303611	0.306233	0.301643	0.30625	0.307185	0.306691
Official exchange rate (LCU per US$, period average)	PA.NUS.FCRF	Kyrgyz Republic	KGZ	41.0118	40.1529	37.3163	36.5746	42.9041	45.9643	46.1439	47.0045	48.4381	53.6541	64.4621	69.9141	68.8667	68.8403	69.7893	77.3461	84.6408	84.1162	87.8561	87.1503
Official exchange rate (LCU per US$, period average)	PA.NUS.FCRF	Lao PDR	LAO	10655.2	10153.6	9602.73	8740.18	8511.35	8254.16	8029.26	8006.58	7833.23	8042.42	8127.61	8124.37	8244.84	8401.33	8679.41	9045.79	9697.92	14035.2	17688.9	..
Official exchange rate (LCU per US$, period average)	PA.NUS.FCRF	Latvia	LVA	0.564717	0.560408	0.513792	0.480817	0.50555	0.530475	0.501233	0.546875	0.529392	0.752728	0.901296	0.903421	0.885206	0.846773	0.893276	0.875506	0.845494	0.949624	0.92484	0.92389
Official exchange rate (LCU per US$, period average)	PA.NUS.FCRF	Lebanon	LBN	1507.5	1507.5	1507.5	1507.5	1507.5	1507.5	1507.5	1507.5	1507.5	1507.5	1507.5	1507.5	1507.5	1507.5	1507.5	1507.5	1507.5	1507.5	13875.6	89500
Official exchange rate (LCU per US$, period average)	PA.NUS.FCRF	Lesotho	LSO	6.35933	6.77155	7.04537	8.26122	8.47367	7.32122	7.26113	8.20997	9.65506	10.8527	12.7589	14.7096	13.3238	13.2339	14.4484	16.4591	14.7787	16.3559	18.4502	18.3287
Official exchange rate (LCU per US$, period average)	PA.NUS.FCRF	Liberia	LBR	57.0958	58.0133	61.2722	63.2075	68.2867	71.4033	72.2267	73.5148	77.52	83.8925	86.1884	94.4272	112.707	144.056	186.43	191.518	166.154	152.934	174.956	..
Official exchange rate (LCU per US$, period average)	PA.NUS.FCRF	Libya	LBY	1.30838	1.31357	1.26264	1.22356	1.25353	1.26679	1.22415	1.26166	1.27169	1.2724	1.38121	1.39037	1.39382	1.36497	1.39826	1.38867	4.51443	4.81318	4.81288	4.83221
Official exchange rate (LCU per US$, period average)	PA.NUS.FCRF	Liechtenstein	LIE	..	..	..	..	..	..	..	..	..	..	..	..	..	..	..	..	..	..	..	0.880441
Official exchange rate (LCU per US$, period average)	PA.NUS.FCRF	Lithuania	LTU	2.77402	2.75223	2.52373	2.35708	2.48403	2.60633	2.4811	2.68629	2.60101	2.60029	0.901296	0.903421	0.885206	0.846773	0.893276	0.875506	0.845494	0.949624	0.92484	0.92389
Official exchange rate (LCU per US$, period average)	PA.NUS.FCRF	Luxembourg	LUX	0.8038	0.796433	0.729672	0.679923	0.716958	0.754309	0.718414	0.778338	0.752945	0.752728	0.901296	0.903421	0.885206	0.846773	0.893276	0.875506	0.845494	0.949624	0.92484	0.92389
Official exchange rate (LCU per US$, period average)	PA.NUS.FCRF	Macao SAR, China	MAC	8.01106	8.00143	8.03585	8.02011	7.98428	8.00222	8.01821	7.98986	7.98926	7.98713	7.98496	7.99506	8.026	8.07251	8.07047	7.98906	8.00553	8.06521	8.06339	8.03683
Official exchange rate (LCU per US$, period average)	PA.NUS.FCRF	Madagascar	MDG	2003.03	2142.3	1873.88	1708.37	1956.21	2089.95	2025.12	2194.97	2206.91	2414.81	2933.51	3176.54	3116.11	3334.75	3618.32	3787.75	3829.98	4096.12	4429.58	4525.42
Official exchange rate (LCU per US$, period average)	PA.NUS.FCRF	Malawi	MWI	118.42	136.012	139.958	140.522	141.168	150.486	156.516	249.107	364.406	424.897	499.606	718.005	730.273	732.333	745.541	749.527	805.9	949.039	1161.09	..
Official exchange rate (LCU per US$, period average)	PA.NUS.FCRF	Malaysia	MYS	3.78709	3.66818	3.43757	3.33583	3.5245	3.22109	3.06	3.0888	3.15091	3.27286	3.9055	4.1483	4.30044	4.03513	4.14247	4.20348	4.1433	4.40108	4.56062	4.57643
Official exchange rate (LCU per US$, period average)	PA.NUS.FCRF	Maldives	MDV	12.8	12.8	12.8	12.8	12.8	12.8	14.602	15.3648	15.3667	15.3804	15.3663	15.3684	15.387	15.3908	15.382	15.3813	15.3727	15.3866	15.3868	15.3892
Official exchange rate (LCU per US$, period average)	PA.NUS.FCRF	Mali	MLI	527.258	522.426	478.634	446	470.293	494.794	471.249	510.556	493.9	493.757	591.212	592.606	580.657	555.446	585.911	575.586	554.531	623.76	606.57	606.345
Official exchange rate (LCU per US$, period average)	PA.NUS.FCRF	Malta	MLT	0.345777	0.340894	0.311675	0.679923	0.716958	0.754309	0.718414	0.778338	0.752945	0.752728	0.901296	0.903421	0.885206	0.846773	0.893276	0.875506	0.845494	0.949624	0.92484	0.92389
Official exchange rate (LCU per US$, period average)	PA.NUS.FCRF	Marshall Islands	MHL	1	1	1	1	1	1	1	1	1	1	1	1	1	1	1	1	1	1	1	1
Official exchange rate (LCU per US$, period average)	PA.NUS.FCRF	Mauritania	MRT	26.5528	26.86	25.8587	23.8203	26.2366	27.5894	28.1118	29.662	30.0682	30.2725	32.4672	35.2371	35.7944	35.6775	36.6908	37.1892	36.0633	36.935	36.4892	..
Official exchange rate (LCU per US$, period average)	PA.NUS.FCRF	Mauritius	MUS	29.4962	31.7081	31.3137	28.4528	31.9598	30.7844	28.706	30.05	30.7014	30.6216	35.0567	35.5419	34.4814	33.9344	35.4735	39.3469	41.6921	44.1828	45.2672	46.4147
Official exchange rate (LCU per US$, period average)	PA.NUS.FCRF	Mexico	MEX	10.8979	10.8992	10.9282	11.1297	13.5135	12.636	12.4233	13.1695	12.772	13.2925	15.8483	18.6641	18.9265	19.2443	19.2636	21.4856	20.2724	20.1273	17.7587	18.3049
Official exchange rate (LCU per US$, period average)	PA.NUS.FCRF	Micronesia, Fed. Sts.	FSM	1	1	1	1	1	1	1	1	1	1	1	1	1	1	1	1	1	1	1	1
Official exchange rate (LCU per US$, period average)	PA.NUS.FCRF	Moldova	MDA	12.5996	13.1311	12.1399	10.392	11.1096	12.3693	11.7386	12.1114	12.5868	14.0356	18.8185	19.9238	18.499	16.8021	17.5735	17.3218	17.6805	18.8972	18.1639	17.7919
Official exchange rate (LCU per US$, period average)	PA.NUS.FCRF	Monaco	MCO	0.8038	0.796433	0.729672	0.679923	0.716958	0.754309	0.718414	0.778338	0.752945	0.752728	0.901296	0.903421	0.885206	0.846773	0.893276	0.875506	0.845494	0.949624	0.92484	0.92389
Official exchange rate (LCU per US$, period average)	PA.NUS.FCRF	Mongolia	MNG	1205.25	1179.7	1170.4	1165.8	1437.8	1357.06	1265.52	1357.58	1523.93	1817.94	1970.31	2140.29	2439.78	2472.48	2663.54	2813.29	2849.29	3140.68	3465.74	3389.98
Official exchange rate (LCU per US$, period average)	PA.NUS.FCRF	Montenegro	MNE	0.8038	0.796433	0.729672	0.679923	0.716958	0.754309	0.718414	0.778338	0.752945	0.752728	0.901296	0.903421	0.885206	0.846773	0.893216	0.877475	0.845377	0.950916	0.92471	0.924367
Official exchange rate (LCU per US$, period average)	PA.NUS.FCRF	Morocco	MAR	8.86501	8.79558	8.19233	7.75033	8.0571	8.41716	8.08987	8.62844	8.4055	8.40634	9.76435	9.80748	9.692	9.3861	9.61708	9.49685	8.98848	10.1607	10.1314	9.94236
Official exchange rate (LCU per US$, period average)	PA.NUS.FCRF	Mozambique	MOZ	23.061	25.4008	25.8403	24.3006	27.5183	33.9601	29.0676	28.373	30.1041	31.3527	39.9825	63.0562	63.5843	60.3262	62.5483	69.465	65.465	63.8508	63.8858	63.905
Official exchange rate (LCU per US$, period average)	PA.NUS.FCRF	Myanmar	MMR	5.81817	5.84294	5.61688	5.44145	5.57637	5.63488	5.44411	640.653	933.57	984.346	1162.62	1234.87	1360.36	1429.81	1518.26	1381.62	..	..	..	..
Official exchange rate (LCU per US$, period average)	PA.NUS.FCRF	Namibia	NAM	6.37712	6.76715	7.05439	8.25174	8.52282	7.33025	7.30002	8.19377	9.75008	10.8429	12.8819	14.7088	13.3129	13.2339	14.4487	16.4633	14.7787	16.3559	18.4463	18.3287
Official exchange rate (LCU per US$, period average)	PA.NUS.FCRF	Nauru	NRU	1.30947	1.32797	1.19507	1.19218	1.28219	1.09016	0.969463	0.965801	1.03584	1.10936	1.33109	1.34521	1.30476	1.33841	1.43851	1.45309	1.33122	1.44166	1.50519	1.51536
Official exchange rate (LCU per US$, period average)	PA.NUS.FCRF	Nepal	NPL	71.3675	72.7556	66.415	69.7617	77.5734	73.2624	74.02	85.2258	93.0844	97.5548	102.405	107.384	104.512	108.93	112.609	118.345	118.134	125.199	132.115	133.727
Official exchange rate (LCU per US$, period average)	PA.NUS.FCRF	Netherlands	NLD	0.8038	0.796433	0.729672	0.679923	0.716958	0.754309	0.718414	0.778338	0.752945	0.752728	0.901296	0.903421	0.885206	0.846773	0.893276	0.875506	0.845494	0.949624	0.92484	0.92389
Official exchange rate (LCU per US$, period average)	PA.NUS.FCRF	New Caledonia	NCL	95.9188	95.0397	87.073	81.1363	85.5558	90.013	85.7296	92.8804	89.8502	89.8243	107.553	107.807	105.633	101.047	106.589	104.711	100.88	113.474	110.347	110.306
Official exchange rate (LCU per US$, period average)	PA.NUS.FCRF	New Zealand	NZL	1.42027	1.54206	1.36068	1.42273	1.60088	1.38783	1.26581	1.23428	1.21941	1.20543	1.43397	1.43653	1.40741	1.44526	1.51788	1.54206	1.4138	1.57718	1.62843	1.65231
Official exchange rate (LCU per US$, period average)	PA.NUS.FCRF	Nicaragua	NIC	16.7333	17.57	18.4485	19.3719	20.3395	21.3564	22.4243	23.5467	24.7228	25.9589	27.2568	28.621	30.0509	31.5532	33.1217	34.3421	35.171	35.8744	36.4412	36.6243
Official exchange rate (LCU per US$, period average)	PA.NUS.FCRF	Niger	NER	527.258	522.426	478.634	446	470.293	494.794	471.249	510.556	493.9	493.757	591.212	592.606	580.657	555.446	585.911	575.586	554.531	623.76	606.57	606.345
Official exchange rate (LCU per US$, period average)	PA.NUS.FCRF	Nigeria	NGA	131.274	128.652	125.808	118.567	148.88	150.298	153.863	157.5	157.312	158.553	192.44	253.492	305.79	306.084	306.921	358.811	401.152	425.979	645.194	1478.97
Official exchange rate (LCU per US$, period average)	PA.NUS.FCRF	North Macedonia	MKD	49.2837	48.8018	44.7298	41.8677	44.1006	46.4854	44.2308	47.8903	46.3953	46.4371	55.5371	55.7317	54.6655	52.1071	54.9472	54.1443	52.1022	58.5744	56.9472	56.8726
Official exchange rate (LCU per US$, period average)	PA.NUS.FCRF	Northern Mariana Islands	MNP	1	1	1	1	1	1	1	1	1	1	1	1	1	1	1	1	1	1	1	1
Official exchange rate (LCU per US$, period average)	PA.NUS.FCRF	Norway	NOR	6.4425	6.41333	5.86167	5.64	6.28833	6.04417	5.60461	5.8175	5.875	6.30167	8.06417	8.4	8.27167	8.1325	8.8	9.41583	8.59	9.61417	10.5633	10.7458
Official exchange rate (LCU per US$, period average)	PA.NUS.FCRF	Oman	OMN	0.3845	0.3845	0.3845	0.3845	0.3845	0.3845	0.3845	0.3845	0.3845	0.3845	0.3845	0.3845	0.3845	0.3845	0.3845	0.3845	0.3845	0.3845	0.3845	0.3845
Official exchange rate (LCU per US$, period average)	PA.NUS.FCRF	Pakistan	PAK	59.5145	60.2713	60.7385	70.408	81.7129	85.1938	86.3434	93.3952	101.629	101.1	102.769	104.769	105.455	121.824	150.036	161.838	162.906	204.867	280.356	278.581
Official exchange rate (LCU per US$, period average)	PA.NUS.FCRF	Palau	PLW	1	1	1	1	1	1	1	1	1	1	1	1	1	1	1	1	1	1	1	1
Official exchange rate (LCU per US$, period average)	PA.NUS.FCRF	Panama	PAN	1	1	1	1	1	1	1	1	1	1	1	1	1	1	1	1	1	1	1	1
Official exchange rate (LCU per US$, period average)	PA.NUS.FCRF	Papua New Guinea	PNG	3.10195	3.05673	2.96535	2.70009	2.75514	2.71929	2.37097	2.08365	2.24451	2.46138	2.76841	3.13303	3.18879	3.29346	3.38754	3.45997	3.50877	3.51923	3.58962	3.85275
Official exchange rate (LCU per US$, period average)	PA.NUS.FCRF	Paraguay	PRY	6177.93	5635.09	5032.71	4363.29	4966.68	4758.43	4193.8	4421.66	4303.88	4462.19	5204.92	5670.54	5618.93	5732.1	6240.72	6771.1	6774.16	6982.75	7288.87	7560.25
Official exchange rate (LCU per US$, period average)	PA.NUS.FCRF	Peru	PER	3.29584	3.27403	3.12804	2.92441	3.01151	2.82512	2.7541	2.63759	2.7019	2.83904	3.18444	3.37506	3.26049	3.2866	3.33727	3.49494	3.88055	3.83518	3.74383	3.7525
Official exchange rate (LCU per US$, period average)	PA.NUS.FCRF	Philippines	PHL	55.0855	51.3143	46.1484	44.3233	47.6797	45.1097	43.3131	42.2288	42.4462	44.3952	45.5028	47.4925	50.4037	52.6614	51.7958	49.6241	49.2546	54.4778	55.6304	57.2907
Official exchange rate (LCU per US$, period average)	PA.NUS.FCRF	Poland	POL	3.23548	3.10316	2.76795	2.40924	3.12014	3.0153	2.96285	3.25654	3.16062	3.15454	3.7695	3.94278	3.77933	3.61172	3.83937	3.89974	3.86192	4.45776	4.20367	3.98078
Official exchange rate (LCU per US$, period average)	PA.NUS.FCRF	Portugal	PRT	0.8038	0.796433	0.729672	0.679923	0.716958	0.754309	0.718414	0.778338	0.752945	0.752728	0.901296	0.903421	0.885206	0.846773	0.893276	0.875506	0.845494	0.949624	0.92484	0.92389
Official exchange rate (LCU per US$, period average)	PA.NUS.FCRF	Puerto Rico (US)	PRI	1	1	1	1	1	1	1	1	1	1	1	1	1	1	1	1	1	1	1	1
Official exchange rate (LCU per US$, period average)	PA.NUS.FCRF	Qatar	QAT	3.64	3.64	3.64	3.64	3.64	3.64	3.64	3.64	3.64	3.64	3.64	3.64	3.64	3.64	3.64	3.64	3.64	3.64	3.64	3.64
Official exchange rate (LCU per US$, period average)	PA.NUS.FCRF	Romania	ROU	2.91365	2.80898	2.43825	2.51886	3.04933	3.1779	3.04861	3.4682	3.32792	3.34917	4.00567	4.05918	4.05249	3.94162	4.23792	4.24399	4.16042	4.68848	4.57429	4.59837
Official exchange rate (LCU per US$, period average)	PA.NUS.FCRF	Russian Federation	RUS	28.2844	27.191	25.5808	24.8529	31.7404	30.3679	29.3823	30.8398	31.8371	38.3782	60.9377	67.0559	58.3428	62.6681	64.7377	72.1049	73.6543	68.4849	85.162	..
Official exchange rate (LCU per US$, period average)	PA.NUS.FCRF	Rwanda	RWA	557.823	551.71	546.955	546.849	568.281	583.131	600.307	614.295	646.636	682.438	719.86	787.252	831.554	861.093	899.351	943.278	988.625	1030.31	1160.1	1318.13
Official exchange rate (LCU per US$, period average)	PA.NUS.FCRF	Samoa	WSM	2.71034	2.77929	2.61657	2.64418	2.73078	2.48466	2.31747	2.29231	2.3109	2.33177	2.56087	2.56493	2.55438	2.58728	2.64883	2.66496	2.55609	2.689	2.73844	2.75395
Official exchange rate (LCU per US$, period average)	PA.NUS.FCRF	San Marino	SMR	0.8038	0.796433	0.729672	0.679923	0.716958	0.754309	0.718414	0.778338	0.752945	0.752728	0.901296	0.903421	0.885206	0.846773	0.893216	0.877475	0.845377	0.950916	0.92471	0.924367
Official exchange rate (LCU per US$, period average)	PA.NUS.FCRF	Sao Tome and Principe	STP	10.558	12.4486	13.5368	14.6952	16.2085	18.4986	17.6229	19.0684	18.45	18.4664	22.0906	22.1489	21.7411	20.7509	21.8847	21.5071	20.7104	23.2904	22.6584	..
Official exchange rate (LCU per US$, period average)	PA.NUS.FCRF	Saudi Arabia	SAU	3.75	3.75	3.75	3.75	3.75	3.75	3.75	3.75	3.75	3.75	3.75	3.75	3.75	3.75	3.75	3.75	3.75	3.75	3.75	3.75
Official exchange rate (LCU per US$, period average)	PA.NUS.FCRF	Senegal	SEN	527.258	522.426	478.634	446	470.293	494.794	471.249	510.556	493.9	493.757	591.212	592.606	580.657	555.446	585.911	575.586	554.531	623.76	606.57	606.345
Official exchange rate (LCU per US$, period average)	PA.NUS.FCRF	Serbia	SRB	66.7178	67.1551	58.4496	55.7293	67.6049	77.7228	73.3554	87.9588	85.1588	88.4053	108.811	111.278	107.759	100.175	105.25	103.163	99.3959	111.662	108.403	108.208
Official exchange rate (LCU per US$, period average)	PA.NUS.FCRF	Seychelles	SYC	5.5	5.51969	6.70106	9.45724	13.6099	12.0678	12.381	13.704	12.0583	12.747	13.3139	13.3191	13.6478	13.9111	14.0333	17.6165	16.9205	14.2728	14.0181	14.5297
Official exchange rate (LCU per US$, period average)	PA.NUS.FCRF	Sierra Leone	SLE	2.88959	2.96191	2.98519	2.98151	3.38565	3.97809	4.34916	4.34404	4.3325	4.52416	5.08075	6.2903	7.38443	7.93163	9.01022	9.82993	10.4394	14.0476	21.3049	..
Official exchange rate (LCU per US$, period average)	PA.NUS.FCRF	Singapore	SGP	1.6644	1.58893	1.5071	1.41486	1.45451	1.36351	1.25778	1.24968	1.2513	1.26705	1.37482	1.38155	1.38092	1.34884	1.36416	1.37974	1.34348	1.37867	1.34277	1.33623
Official exchange rate (LCU per US$, period average)	PA.NUS.FCRF	Sint Maarten (Dutch part)	SXM	..	..	..	..	..	..	1.79	1.79	1.79	1.79	1.79	1.79	1.79	1.79	1.79	1.79	1.79	1.79	1.79	1.79
Official exchange rate (LCU per US$, period average)	PA.NUS.FCRF	Slovak Republic	SVK	31.0182	29.6973	24.6943	21.3614	0.716958	0.754309	0.718414	0.778338	0.752945	0.752728	0.901296	0.903421	0.885206	0.846773	0.893276	0.875506	0.845494	0.949624	0.92484	0.92389
Official exchange rate (LCU per US$, period average)	PA.NUS.FCRF	Slovenia	SVN	192.705	191.028	0.729672	0.679923	0.716958	0.754309	0.718414	0.778338	0.752945	0.752728	0.901296	0.903421	0.885206	0.846773	0.893276	0.875506	0.845494	0.949624	0.92484	0.92389
Official exchange rate (LCU per US$, period average)	PA.NUS.FCRF	Solomon Islands	SLB	7.52987	7.60946	7.652	7.74792	8.05504	8.0645	7.64126	7.3552	7.30214	7.37535	7.91469	7.94815	7.88739	7.9525	8.1734	8.21341	8.0301	8.15553	8.3756	8.45484
Official exchange rate (LCU per US$, period average)	PA.NUS.FCRF	Somalia, Fed. Rep.	SOM	..	..	..	..	31558.9	31269.7	29966.8	22516	19283.8	20230.9	22254.2	23061.8	23098	..	..	..	..	..	..	..
Official exchange rate (LCU per US$, period average)	PA.NUS.FCRF	South Africa	ZAF	6.35933	6.77155	7.04537	8.26122	8.47367	7.32122	7.26113	8.20997	9.65506	10.8527	12.7589	14.7096	13.3238	13.2339	14.4484	16.4591	14.7787	16.3559	18.4502	18.3287
Official exchange rate (LCU per US$, period average)	PA.NUS.FCRF	South Sudan	SSD	..	..	..	..	..	..	2.98895	2.95	2.95	2.95	3.60417	46.7292	113.647	141.386	157.999	165.907	306.355	534.511	930.331	2163.1
Official exchange rate (LCU per US$, period average)	PA.NUS.FCRF	Spain	ESP	0.8038	0.796433	0.729672	0.679923	0.716958	0.754309	0.718414	0.778338	0.752945	0.752728	0.901296	0.903421	0.885206	0.846773	0.893276	0.875506	0.845494	0.949624	0.92484	0.92389
Official exchange rate (LCU per US$, period average)	PA.NUS.FCRF	Sri Lanka	LKA	100.498	103.914	110.623	108.334	114.945	113.064	110.565	127.603	129.069	130.565	135.857	145.582	152.446	162.465	178.745	185.593	198.764	322.633	327.507	..
Official exchange rate (LCU per US$, period average)	PA.NUS.FCRF	St. Kitts and Nevis	KNA	2.7	2.7	2.7	2.7	2.7	2.7	2.7	2.7	2.7	2.7	2.7	2.7	2.7	2.7	2.7	2.7	2.7	2.7	2.7	2.7
Official exchange rate (LCU per US$, period average)	PA.NUS.FCRF	St. Lucia	LCA	2.7	2.7	2.7	2.7	2.7	2.7	2.7	2.7	2.7	2.7	2.7	2.7	2.7	2.7	2.7	2.7	2.7	2.7	2.7	2.7
Official exchange rate (LCU per US$, period average)	PA.NUS.FCRF	St. Martin (French part)	MAF	0.8038	0.796433	0.729672	0.679923	0.716958	0.754309	0.718414	0.778338	0.752945	0.752728	0.901296	0.903421	0.885206	0.846773	0.893276	0.875506	0.845494	0.949624	0.92484	0.92389
Official exchange rate (LCU per US$, period average)	PA.NUS.FCRF	St. Vincent and the Grenadines	VCT	2.7	2.7	2.7	2.7	2.7	2.7	2.7	2.7	2.7	2.7	2.7	2.7	2.7	2.7	2.7	2.7	2.7	2.7	2.7	2.7
Official exchange rate (LCU per US$, period average)	PA.NUS.FCRF	Sudan	SDN	2.43606	2.17153	2.0161	2.09016	2.30153	2.306	2.66662	3.57296	4.75676	5.73687	6.02573	6.21171	6.68336	24.3289	45.767	53.996	370.791	546.759	..	..
Official exchange rate (LCU per US$, period average)	PA.NUS.FCRF	Suriname	SUR	2.73167	2.74375	2.745	2.745	2.745	2.74542	3.268	3.3	3.3	3.3	3.41667	6.22863	7.48766	7.46251	7.458	9.30955	18.2387	24.7092	36.7759	33.1806
Official exchange rate (LCU per US$, period average)	PA.NUS.FCRF	Sweden	SWE	7.47309	7.37825	6.75877	6.5911	7.65382	7.20752	6.49354	6.77502	6.51397	6.86078	8.43484	8.56199	8.54886	8.69252	9.45835	9.21031	8.57657	10.1143	10.6102	10.5676
Official exchange rate (LCU per US$, period average)	PA.NUS.FCRF	Switzerland	CHE	1.24518	1.25384	1.20037	1.08309	1.08814	1.04291	0.888042	0.937684	0.926904	0.916151	0.962381	0.985394	0.984692	0.977892	0.993709	0.938965	0.913846	0.954832	0.89849	0.880441
Official exchange rate (LCU per US$, period average)	PA.NUS.FCRF	Syrian Arab Republic	SYR	11.225	11.225	11.225	11.225	11.225	11.225	48.3367	64.5808	108.733	154.13	237.029	460.276	492.611	436.5	436.5	877.945	1256	2505.75	..	..
Official exchange rate (LCU per US$, period average)	PA.NUS.FCRF	Tajikistan	TJK	3.11657	3.29841	3.44248	3.43072	4.14271	4.37897	4.61018	4.73771	4.76423	4.93757	6.16312	7.83568	8.54974	9.15122	9.53037	10.3219	11.3088	11.0311	10.8445	10.7995
Official exchange rate (LCU per US$, period average)	PA.NUS.FCRF	Tanzania	TZA	1128.93	1251.9	1245.04	1196.31	1320.31	1395.62	1557.43	1571.7	1597.56	1653.23	1991.39	2177.09	2228.86	2263.78	2288.21	2294.15	2297.76	2303.03	2383.04	2597.9
Official exchange rate (LCU per US$, period average)	PA.NUS.FCRF	Thailand	THA	40.2201	37.882	34.5182	33.3133	34.2858	31.6857	30.4917	31.0831	30.726	32.4798	34.2477	35.2964	33.9398	32.3102	31.0476	31.2937	31.9771	35.0614	34.8022	35.2935
Official exchange rate (LCU per US$, period average)	PA.NUS.FCRF	Timor-Leste	TLS	1	1	1	1	1	1	1	1	1	1	1	1	1	1	1	1	1	1	1	1
Official exchange rate (LCU per US$, period average)	PA.NUS.FCRF	Togo	TGO	527.258	522.426	478.634	446	470.293	494.794	471.249	510.556	493.9	493.757	591.212	592.606	580.657	555.446	585.911	575.586	554.531	623.76	606.57	606.345
Official exchange rate (LCU per US$, period average)	PA.NUS.FCRF	Tonga	TON	1.94304	2.02588	1.97093	1.94244	2.03449	1.90599	1.72895	1.71951	1.77371	1.84677	2.10576	2.21566	2.20597	2.23657	2.28949	2.29956	2.26496	2.32793	2.3637	2.37304
Official exchange rate (LCU per US$, period average)	PA.NUS.FCRF	Trinidad and Tobago	TTO	6.29956	6.31228	6.32803	6.28943	6.32491	6.37551	6.4093	6.4296	6.44263	6.40909	6.37744	6.66897	6.77952	6.77075	6.75433	6.75105	6.75853	6.75413	6.75026	6.75012
Official exchange rate (LCU per US$, period average)	PA.NUS.FCRF	Tunisia	TUN	1.29743	1.33102	1.28136	1.23214	1.35027	1.4314	1.40778	1.56189	1.62466	1.69768	1.96162	2.14803	2.41942	2.64687	2.93443	2.81236	2.79447	3.1036	3.10617	3.10745
Official exchange rate (LCU per US$, period average)	PA.NUS.FCRF	Turkiye	TUR	1.34358	1.42845	1.30293	1.30152	1.54996	1.50285	1.67495	1.796	1.90377	2.18854	2.72001	3.02013	3.64813	4.82837	5.67382	7.00861	8.85041	16.5489	23.7386	32.8059
Official exchange rate (LCU per US$, period average)	PA.NUS.FCRF	Turkmenistan	TKM	..	..	..	..	..	..	..	..	..	..	..	..	..	..	..	..	..	..	..	..
Official exchange rate (LCU per US$, period average)	PA.NUS.FCRF	Turks and Caicos Islands	TCA	1	1	1	1	1	1	1	1	1	1	1	1	1	1	1	1	1	1	1	1
Official exchange rate (LCU per US$, period average)	PA.NUS.FCRF	Tuvalu	TUV	..	..	..	..	..	..	..	..	..	..	..	..	..	..	..	..	..	..	..	1.51536
Official exchange rate (LCU per US$, period average)	PA.NUS.FCRF	Uganda	UGA	1780.54	1831.45	1723.49	1720.44	2030.49	2177.56	2522.8	2504.56	2586.89	2599.79	3240.65	3420.1	3611.22	3727.07	3704.05	3718.25	3587.05	3689.82	3726.14	3757.26
Official exchange rate (LCU per US$, period average)	PA.NUS.FCRF	Ukraine	UKR	5.12473	5.05	5.05	5.26722	7.79124	7.93564	7.96756	7.99103	7.993	11.8867	21.8447	25.5513	26.5966	27.2005	25.8456	26.9575	27.2862	32.3423	36.5738	40.1521
Official exchange rate (LCU per US$, period average)	PA.NUS.FCRF	United Arab Emirates	ARE	3.6725	3.6725	3.6725	3.6725	3.6725	3.6725	3.6725	3.6725	3.6725	3.6725	3.6725	3.6725	3.6725	3.6725	3.6725	3.6725	3.6725	3.6725	3.6725	3.6725
Official exchange rate (LCU per US$, period average)	PA.NUS.FCRF	United Kingdom	GBR	0.549998	0.543487	0.499772	0.543966	0.641919	0.647179	0.624141	0.633047	0.639661	0.60773	0.654545	0.740634	0.776977	0.749532	0.783445	0.78	0.727065	0.811302	0.804539	0.782415
Official exchange rate (LCU per US$, period average)	PA.NUS.FCRF	United States	USA	1	1	1	1	1	1	1	1	1	1	1	1	1	1	1	1	1	1	1	1
Official exchange rate (LCU per US$, period average)	PA.NUS.FCRF	Uruguay	URY	24.4786	24.0734	23.471	20.9493	22.568	20.0593	19.3142	20.3106	20.4816	23.246	27.3274	30.1626	28.6764	30.7253	35.2554	42.0133	43.5546	41.1711	38.8239	40.2128
Official exchange rate (LCU per US$, period average)	PA.NUS.FCRF	Uzbekistan	UZB	..	..	..	..	..	..	..	..	2094.99	2310.95	2567.99	2965.25	5113.88	8069.61	8836.79	10054.3	10609.5	11050.1	11734.8	12652.3
Official exchange rate (LCU per US$, period average)	PA.NUS.FCRF	Vanuatu	VUT	109.246	110.641	102.438	101.334	106.741	96.9058	89.4692	92.6375	94.5425	97.0717	108.989	108.475	107.821	110.165	114.733	115.38	109.453	115.354	119.112	119.167
Official exchange rate (LCU per US$, period average)	PA.NUS.FCRF	Venezuela, RB	VEN	2.08975	2.147	2.147	2.147	2.147	2.58206	4.2893	4.2893	6.04796	6.2842	6.2842	9.25734	9.975	..	..	..	..	..	..	..
Official exchange rate (LCU per US$, period average)	PA.NUS.FCRF	Viet Nam	VNM	15858.9	15994.2	16105.1	16302.2	17065.1	18612.9	20509.8	20828	20933.4	21148	21697.6	21935	22370.1	22602	23050.2	23208.4	23159.8	23271.2	23787.3	24164.9
Official exchange rate (LCU per US$, period average)	PA.NUS.FCRF	Virgin Islands (U.S.)	VIR	1	1	1	1	1	1	1	1	1	1	1	1	1	1	1	1	1	1	1	1
Official exchange rate (LCU per US$, period average)	PA.NUS.FCRF	West Bank and Gaza	PSE	..	..	..	..	..	..	..	..	..	..	..	..	..	..	..	..	..	..	..	..
Official exchange rate (LCU per US$, period average)	PA.NUS.FCRF	Yemen, Rep.	YEM	191.509	197.049	198.953	199.764	202.847	219.59	213.8	214.349	214.89	214.89	230.833	283.896	282.195	214.89	486.731	743.006	1028.11	1115	1355.12	..
Official exchange rate (LCU per US$, period average)	PA.NUS.FCRF	Zambia	ZMB	4.465	3.60167	4.00167	3.745	5.045	4.7975	4.86167	5.1475	5.39648	6.15417	8.63167	10.3075	9.5175	10.4583	12.89	18.3441	20.0185	16.9376	20.212	26.1664
Official exchange rate (LCU per US$, period average)	PA.NUS.FCRF	Zimbabwe	ZWE	22.389	164.547	9686.77	6.72305e+09	..	..	..	..	..	..	..	..	..	..	..	51.329	88.5524	374.954	3509.17	3266.33
Official exchange rate (LCU per US$, period average)	PA.NUS.FCRF	Africa Eastern and Southern	AFE	..	..	..	..	..	..	..	..	..	..	..	..	..	..	..	..	..	..	..	..
Official exchange rate (LCU per US$, period average)	PA.NUS.FCRF	Africa Western and Central	AFW	..	..	..	..	..	..	..	..	..	..	..	..	..	..	..	..	..	..	..	..
Official exchange rate (LCU per US$, period average)	PA.NUS.FCRF	Arab World	ARB	..	..	..	..	..	..	..	..	..	..	..	..	..	..	..	..	..	..	..	..
Official exchange rate (LCU per US$, period average)	PA.NUS.FCRF	Caribbean small states	CSS	..	..	..	..	..	..	..	..	..	..	..	..	..	..	..	..	..	..	..	..
Official exchange rate (LCU per US$, period average)	PA.NUS.FCRF	Central Europe and the Baltics	CEB	..	..	..	..	..	..	..	..	..	..	..	..	..	..	..	..	..	..	..	..
Official exchange rate (LCU per US$, period average)	PA.NUS.FCRF	Early-demographic dividend	EAR	..	..	..	..	..	..	..	..	..	..	..	..	..	..	..	..	..	..	..	..
Official exchange rate (LCU per US$, period average)	PA.NUS.FCRF	East Asia & Pacific	EAS	..	..	..	..	..	..	..	..	..	..	..	..	..	..	..	..	..	..	..	..
Official exchange rate (LCU per US$, period average)	PA.NUS.FCRF	East Asia & Pacific (excluding high income)	EAP	..	..	..	..	..	..	..	..	..	..	..	..	..	..	..	..	..	..	..	..
Official exchange rate (LCU per US$, period average)	PA.NUS.FCRF	East Asia & Pacific (IDA & IBRD countries)	TEA	..	..	..	..	..	..	..	..	..	..	..	..	..	..	..	..	..	..	..	..
Official exchange rate (LCU per US$, period average)	PA.NUS.FCRF	Euro area	EMU	0.8038	0.796433	0.729672	0.679923	0.716958	0.754309	0.718414	0.778338	0.752945	0.752728	0.901296	0.903421	0.885206	0.846773	0.893276	0.875506	0.845494	0.949624	0.92484	0.92389
Official exchange rate (LCU per US$, period average)	PA.NUS.FCRF	Europe & Central Asia	ECS	..	..	..	..	..	..	..	..	..	..	..	..	..	..	..	..	..	..	..	..
Official exchange rate (LCU per US$, period average)	PA.NUS.FCRF	Europe & Central Asia (excluding high income)	ECA	..	..	..	..	..	..	..	..	..	..	..	..	..	..	..	..	..	..	..	..
Official exchange rate (LCU per US$, period average)	PA.NUS.FCRF	Europe & Central Asia (IDA & IBRD countries)	TEC	..	..	..	..	..	..	..	..	..	..	..	..	..	..	..	..	..	..	..	..
Official exchange rate (LCU per US$, period average)	PA.NUS.FCRF	European Union	EUU	..	..	..	..	..	..	..	..	..	..	..	..	..	..	..	..	..	..	..	..
Official exchange rate (LCU per US$, period average)	PA.NUS.FCRF	Fragile and conflict affected situations	FCS	..	..	..	..	..	..	..	..	..	..	..	..	..	..	..	..	..	..	..	..
Official exchange rate (LCU per US$, period average)	PA.NUS.FCRF	Heavily indebted poor countries (HIPC)	HPC	..	..	..	..	..	..	..	..	..	..	..	..	..	..	..	..	..	..	..	..
Official exchange rate (LCU per US$, period average)	PA.NUS.FCRF	High income	HIC	..	..	..	..	..	..	..	..	..	..	..	..	..	..	..	..	..	..	..	..
Official exchange rate (LCU per US$, period average)	PA.NUS.FCRF	IBRD only	IBD	..	..	..	..	..	..	..	..	..	..	..	..	..	..	..	..	..	..	..	..
Official exchange rate (LCU per US$, period average)	PA.NUS.FCRF	IDA & IBRD total	IBT	..	..	..	..	..	..	..	..	..	..	..	..	..	..	..	..	..	..	..	..
Official exchange rate (LCU per US$, period average)	PA.NUS.FCRF	IDA blend	IDB	..	..	..	..	..	..	..	..	..	..	..	..	..	..	..	..	..	..	..	..
Official exchange rate (LCU per US$, period average)	PA.NUS.FCRF	IDA only	IDX	..	..	..	..	..	..	..	..	..	..	..	..	..	..	..	..	..	..	..	..
Official exchange rate (LCU per US$, period average)	PA.NUS.FCRF	IDA total	IDA	..	..	..	..	..	..	..	..	..	..	..	..	..	..	..	..	..	..	..	..
Official exchange rate (LCU per US$, period average)	PA.NUS.FCRF	Late-demographic dividend	LTE	..	..	..	..	..	..	..	..	..	..	..	..	..	..	..	..	..	..	..	..
Official exchange rate (LCU per US$, period average)	PA.NUS.FCRF	Latin America & Caribbean	LCN	..	..	..	..	..	..	..	..	..	..	..	..	..	..	..	..	..	..	..	..
Official exchange rate (LCU per US$, period average)	PA.NUS.FCRF	Latin America & Caribbean (excluding high income)	LAC	..	..	..	..	..	..	..	..	..	..	..	..	..	..	..	..	..	..	..	..
Official exchange rate (LCU per US$, period average)	PA.NUS.FCRF	Latin America & the Caribbean (IDA & IBRD countries)	TLA	..	..	..	..	..	..	..	..	..	..	..	..	..	..	..	..	..	..	..	..
Official exchange rate (LCU per US$, period average)	PA.NUS.FCRF	Least developed countries: UN classification	LDC	..	..	..	..	..	..	..	..	..	..	..	..	..	..	..	..	..	..	..	..
Official exchange rate (LCU per US$, period average)	PA.NUS.FCRF	Low & middle income	LMY	..	..	..	..	..	..	..	..	..	..	..	..	..	..	..	..	..	..	..	..
Official exchange rate (LCU per US$, period average)	PA.NUS.FCRF	Low income	LIC	..	..	..	..	..	..	..	..	..	..	..	..	..	..	..	..	..	..	..	..
Official exchange rate (LCU per US$, period average)	PA.NUS.FCRF	Lower middle income	LMC	..	..	..	..	..	..	..	..	..	..	..	..	..	..	..	..	..	..	..	..
Official exchange rate (LCU per US$, period average)	PA.NUS.FCRF	Middle East, North Africa, Afghanistan & Pakistan	MEA	..	..	..	..	..	..	..	..	..	..	..	..	..	..	..	..	..	..	..	..
Official exchange rate (LCU per US$, period average)	PA.NUS.FCRF	Middle East, North Africa, Afghanistan & Pakistan (excluding high income)	MNA	..	..	..	..	..	..	..	..	..	..	..	..	..	..	..	..	..	..	..	..
Official exchange rate (LCU per US$, period average)	PA.NUS.FCRF	Middle East, North Africa, Afghanistan & Pakistan (IDA & IBRD)	TMN	..	..	..	..	..	..	..	..	..	..	..	..	..	..	..	..	..	..	..	..
Official exchange rate (LCU per US$, period average)	PA.NUS.FCRF	Middle income	MIC	..	..	..	..	..	..	..	..	..	..	..	..	..	..	..	..	..	..	..	..
Official exchange rate (LCU per US$, period average)	PA.NUS.FCRF	North America	NAC	..	..	..	..	..	..	..	..	..	..	..	..	..	..	..	..	..	..	..	..
Official exchange rate (LCU per US$, period average)	PA.NUS.FCRF	Not classified	INX	..	..	..	..	..	..	..	..	..	..	..	..	..	..	..	..	..	..	..	..
Official exchange rate (LCU per US$, period average)	PA.NUS.FCRF	OECD members	OED	..	..	..	..	..	..	..	..	..	..	..	..	..	..	..	..	..	..	..	..
Official exchange rate (LCU per US$, period average)	PA.NUS.FCRF	Other small states	OSS	..	..	..	..	..	..	..	..	..	..	..	..	..	..	..	..	..	..	..	..
Official exchange rate (LCU per US$, period average)	PA.NUS.FCRF	Pacific island small states	PSS	..	..	..	..	..	..	..	..	..	..	..	..	..	..	..	..	..	..	..	..
Official exchange rate (LCU per US$, period average)	PA.NUS.FCRF	Post-demographic dividend	PST	..	..	..	..	..	..	..	..	..	..	..	..	..	..	..	..	..	..	..	..
Official exchange rate (LCU per US$, period average)	PA.NUS.FCRF	Pre-demographic dividend	PRE	..	..	..	..	..	..	..	..	..	..	..	..	..	..	..	..	..	..	..	..
Official exchange rate (LCU per US$, period average)	PA.NUS.FCRF	Small states	SST	..	..	..	..	..	..	..	..	..	..	..	..	..	..	..	..	..	..	..	..
Official exchange rate (LCU per US$, period average)	PA.NUS.FCRF	South Asia	SAS	..	..	..	..	..	..	..	..	..	..	..	..	..	..	..	..	..	..	..	..
Official exchange rate (LCU per US$, period average)	PA.NUS.FCRF	South Asia (IDA & IBRD)	TSA	..	..	..	..	..	..	..	..	..	..	..	..	..	..	..	..	..	..	..	..
Official exchange rate (LCU per US$, period average)	PA.NUS.FCRF	Sub-Saharan Africa	SSF	..	..	..	..	..	..	..	..	..	..	..	..	..	..	..	..	..	..	..	..
Official exchange rate (LCU per US$, period average)	PA.NUS.FCRF	Sub-Saharan Africa (excluding high income)	SSA	..	..	..	..	..	..	..	..	..	..	..	..	..	..	..	..	..	..	..	..
Official exchange rate (LCU per US$, period average)	PA.NUS.FCRF	Sub-Saharan Africa (IDA & IBRD countries)	TSS	..	..	..	..	..	..	..	..	..	..	..	..	..	..	..	..	..	..	..	..
Official exchange rate (LCU per US$, period average)	PA.NUS.FCRF	Upper middle income	UMC	..	..	..	..	..	..	..	..	..	..	..	..	..	..	..	..	..	..	..	..
Official exchange rate (LCU per US$, period average)	PA.NUS.FCRF	World	WLD	..	..	..	..	..	..	..	..	..	..	..	..	..	..	..	..	..	..	..	..
Unemployment, female (% of female labor force) (national estimate)	SL.UEM.TOTL.FE.NE.ZS	Afghanistan	AFG	..	..	..	2.187	..	..	..	3.333	..	10.112	..	..	14.027	..	..	16.772	5.519	..	..	..
Unemployment, female (% of female labor force) (national estimate)	SL.UEM.TOTL.FE.NE.ZS	Albania	ALB	7.07	16.8	16.431	13.722	15.643	15.844	13.753	11.489	13.436	15.52	17.121	14.471	12.504	11.883	11.316	11.852	11.68	11.235	10.958	..
Unemployment, female (% of female labor force) (national estimate)	SL.UEM.TOTL.FE.NE.ZS	Algeria	DZA	..	..	..	..	18.1	19.1	..	16.99	16.3	15.582	16.566	18.247	20.62	..	..	..	..	..	..	..
Unemployment, female (% of female labor force) (national estimate)	SL.UEM.TOTL.FE.NE.ZS	American Samoa	ASM	..	..	..	..	..	..	..	..	..	..	..	..	..	..	..	..	..	..	..	..
Unemployment, female (% of female labor force) (national estimate)	SL.UEM.TOTL.FE.NE.ZS	Andorra	AND	..	..	..	..	..	..	..	..	..	..	..	..	..	..	..	..	..	..	..	..
Unemployment, female (% of female labor force) (national estimate)	SL.UEM.TOTL.FE.NE.ZS	Angola	AGO	..	..	..	..	2.821	10.87	18.71	..	..	9.103	..	..	..	..	16.444	..	15.741	14.358	..	..
Unemployment, female (% of female labor force) (national estimate)	SL.UEM.TOTL.FE.NE.ZS	Antigua and Barbuda	ATG	..	..	..	..	..	..	..	..	..	..	..	..	..	9.883	..	..	..	..	5.949	..
Unemployment, female (% of female labor force) (national estimate)	SL.UEM.TOTL.FE.NE.ZS	Argentina	ARG	13.521	12.341	..	9.68	9.831	9.169	8.485	8.788	8.464	8.362	..	..	9.446	10.508	10.69	12.36	9.825	7.66	6.778	1.832
Unemployment, female (% of female labor force) (national estimate)	SL.UEM.TOTL.FE.NE.ZS	Armenia	ARM	..	..	10.355	25.856	20.525	21.666	20.244	18.591	18.753	19.382	19.227	17.487	17.476	13.532	11.366	8.629	9.236	9.469	9.444	..
Unemployment, female (% of female labor force) (national estimate)	SL.UEM.TOTL.FE.NE.ZS	Aruba	ABW	..	..	6.53	..	..	10.43	7.8	..	..	..	..	..	..	..	..	..	..	..	..	..
Unemployment, female (% of female labor force) (national estimate)	SL.UEM.TOTL.FE.NE.ZS	Australia	AUS	5.22	4.922	4.784	4.57	5.401	5.375	5.304	5.325	5.609	6.171	6.072	5.785	5.701	5.397	5.098	6.343	4.866	3.672	3.572	3.828
Unemployment, female (% of female labor force) (national estimate)	SL.UEM.TOTL.FE.NE.ZS	Austria	AUT	5.894	5.647	5.335	4.452	5.127	4.679	4.64	4.827	5.326	5.43	5.373	5.595	5.097	4.731	4.424	5.016	6.403	4.798	5.025	4.726
Unemployment, female (% of female labor force) (national estimate)	SL.UEM.TOTL.FE.NE.ZS	Azerbaijan	AZE	7.28	6.33	5.5	5.54	6.58	6.91	6.45	6.09	5.95	5.84	5.87	6	5.9	5.8	5.78	8.44	7	6.54	..	..
Unemployment, female (% of female labor force) (national estimate)	SL.UEM.TOTL.FE.NE.ZS	Bahamas, The	BHS	11.18	8.02	9.07	9.25	14.04	..	15.31	13.97	16.26	14.6	12.9	14.5	10.9	10	9.687	..	..	..	8.207	..
Unemployment, female (% of female labor force) (national estimate)	SL.UEM.TOTL.FE.NE.ZS	Bahrain	BHR	..	..	..	..	..	3.68	..	3.88	..	..	..	..	..	..	..	..	..	..	..	..
Unemployment, female (% of female labor force) (national estimate)	SL.UEM.TOTL.FE.NE.ZS	Bangladesh	BGD	7.03	6.44	..	..	7.4	4.358	5.864	..	7.414	..	..	7.29	6.681	..	..	..	..	4.894	3.236	..
Unemployment, female (% of female labor force) (national estimate)	SL.UEM.TOTL.FE.NE.ZS	Barbados	BRB	..	..	..	..	9.89	10.47	..	..	11.43	12.78	8.966	8.652	8.779	8.533	7.27	..	11.56	7.567	6.902	..
Unemployment, female (% of female labor force) (national estimate)	SL.UEM.TOTL.FE.NE.ZS	Belarus	BLR	2	1.5	1.2	0.9	4.6	..	0.6	0.5	0.4	0.4	0.7	4.194	4.044	3.562	3.2	3.301	3.068	2.905	2.781	..
Unemployment, female (% of female labor force) (national estimate)	SL.UEM.TOTL.FE.NE.ZS	Belgium	BEL	9.507	9.309	8.444	7.597	8.105	8.515	7.18	7.41	8.171	7.941	7.769	7.561	7.052	5.562	4.941	5.352	5.837	5.257	5.059	5.246
Unemployment, female (% of female labor force) (national estimate)	SL.UEM.TOTL.FE.NE.ZS	Belize	BLZ	17.06	15.09	13.01	..	..	..	..	..	12.592	14.016	11.074	11.137	9.808	14.747	13.584	..	..	..	..	..
Unemployment, female (% of female labor force) (national estimate)	SL.UEM.TOTL.FE.NE.ZS	Benin	BEN	..	..	..	..	..	1.14	2.859	..	1.857	..	..	..	..	..	1.332	..	..	1.493	..	..
Unemployment, female (% of female labor force) (national estimate)	SL.UEM.TOTL.FE.NE.ZS	Bermuda	BMU	..	..	..	..	3.01	5.97	..	8.17	5.56	8.05	..	..	..	..	..	..	..	..	..	..
Unemployment, female (% of female labor force) (national estimate)	SL.UEM.TOTL.FE.NE.ZS	Bhutan	BTN	3.3	3.81	..	..	5.35	3.97	4.54	2.2	3.7	3.49	3.15	..	..	4.154	3.263	5.974	6.061	7.941	4.205	4.139
Unemployment, female (% of female labor force) (national estimate)	SL.UEM.TOTL.FE.NE.ZS	Bolivia	BOL	6.54	5.74	5.95	3.354	3.606	..	2.678	2.793	3.004	2.848	3.79	4.032	4.046	3.609	3.986	9.777	5.443	4.031	3.316	3.172
Unemployment, female (% of female labor force) (national estimate)	SL.UEM.TOTL.FE.NE.ZS	Bosnia and Herzegovina	BIH	..	34.864	32.943	26.785	25.643	29.928	29.941	30.664	29.021	31.166	30.694	30.049	23.135	20.326	18.778	18.536	18.118	15.448	12.818	..
Unemployment, female (% of female labor force) (national estimate)	SL.UEM.TOTL.FE.NE.ZS	Botswana	BWA	..	19.985	..	..	19.597	21.43	22.452	..	..	..	..	..	..	..	21.88	22.557	25.944	25.928	26.894	26.399
Unemployment, female (% of female labor force) (national estimate)	SL.UEM.TOTL.FE.NE.ZS	Brazil	BRA	13.89	12.696	12.407	11.173	12.585	..	10.351	9.222	8.958	8.306	10.292	13.584	14.861	14.394	14.322	16.223	16.41	11.491	9.681	8.36
Unemployment, female (% of female labor force) (national estimate)	SL.UEM.TOTL.FE.NE.ZS	British Virgin Islands	VGB	..	..	..	..	..	..	..	..	..	..	..	..	..	..	..	..	..	..	..	..
Unemployment, female (% of female labor force) (national estimate)	SL.UEM.TOTL.FE.NE.ZS	Brunei Darussalam	BRN	..	..	..	..	..	..	..	..	..	7.838	..	..	9.958	10.073	7.919	8.912	6.424	5.941	5.32	..
Unemployment, female (% of female labor force) (national estimate)	SL.UEM.TOTL.FE.NE.ZS	Bulgaria	BGR	9.835	9.296	7.286	5.758	6.624	9.608	10.107	10.84	11.845	10.404	8.417	6.968	5.946	4.654	3.795	4.673	4.919	3.929	4.218	3.907
Unemployment, female (% of female labor force) (national estimate)	SL.UEM.TOTL.FE.NE.ZS	Burkina Faso	BFA	..	1.669	3.9	..	..	..	..	..	..	9.237	..	..	..	4.633	1.627	..	..	1.943	5.735	4.339
Unemployment, female (% of female labor force) (national estimate)	SL.UEM.TOTL.FE.NE.ZS	Burundi	BDI	..	2.372	..	1.142	..	..	..	..	..	1.171	..	..	..	..	..	0.981	..	..	..	..
Unemployment, female (% of female labor force) (national estimate)	SL.UEM.TOTL.FE.NE.ZS	Cabo Verde	CPV	..	..	..	..	13.715	..	..	..	..	..	31.635	..	12.76	11.55	12.07	..	..	..	..	..
Unemployment, female (% of female labor force) (national estimate)	SL.UEM.TOTL.FE.NE.ZS	Cambodia	KHM	..	..	1.191	0.861	0.557	0.794	0.477	1.133	0.516	0.695	0.457	0.851	0.175	..	0.517	0.209	0.416	..	0.208	..
Unemployment, female (% of female labor force) (national estimate)	SL.UEM.TOTL.FE.NE.ZS	Cameroon	CMR	21.504	..	3.495	..	..	4.88	..	..	..	4.027	..	..	..	..	..	..	4.134	..	..	..
Unemployment, female (% of female labor force) (national estimate)	SL.UEM.TOTL.FE.NE.ZS	Canada	CAN	6.465	6.202	5.791	5.77	7.164	7.356	7.175	6.951	6.684	6.504	6.307	6.277	5.929	5.528	5.265	9.522	7.34	5.138	5.259	6.011
Unemployment, female (% of female labor force) (national estimate)	SL.UEM.TOTL.FE.NE.ZS	Cayman Islands	CYM	..	2.81	4.2	4.12	4.99	..	5.47	5.31	5.84	4.65	5.2	..	..	..	..	..	..	..	..	..
Unemployment, female (% of female labor force) (national estimate)	SL.UEM.TOTL.FE.NE.ZS	Central African Republic	CAF	..	..	..	..	..	..	..	..	..	..	..	..	..	..	..	..	..	..	..	..
Unemployment, female (% of female labor force) (national estimate)	SL.UEM.TOTL.FE.NE.ZS	Chad	TCD	..	..	..	..	..	..	..	..	..	..	..	..	..	0.78	..	..	..	..	..	..
Unemployment, female (% of female labor force) (national estimate)	SL.UEM.TOTL.FE.NE.ZS	Channel Islands	CHI	..	..	..	..	..	..	..	..	..	..	..	..	..	..	..	..	..	..	..	..
Unemployment, female (% of female labor force) (national estimate)	SL.UEM.TOTL.FE.NE.ZS	Chile	CHL	12.278	11.756	10.883	12.131	13.42	10.118	9.03	8.29	7.339	7.297	7.306	7.458	7.798	8.579	8.281	11.41	9.705	8.908	9.439	9.543
Unemployment, female (% of female labor force) (national estimate)	SL.UEM.TOTL.FE.NE.ZS	China	CHN	..	..	..	..	..	..	..	..	..	..	..	..	..	..	..	..	..	..	..	..
Unemployment, female (% of female labor force) (national estimate)	SL.UEM.TOTL.FE.NE.ZS	Colombia	COL	14.464	..	13.144	13.447	14.533	14.342	13.284	12.87	11.891	11.262	11.076	11.427	11.706	11.984	13.08	19.529	18.128	13.191	11.831	11.864
Unemployment, female (% of female labor force) (national estimate)	SL.UEM.TOTL.FE.NE.ZS	Comoros	COM	..	..	..	..	..	..	..	..	..	10.442	..	..	..	..	..	..	5.012	..	..	..
Unemployment, female (% of female labor force) (national estimate)	SL.UEM.TOTL.FE.NE.ZS	Congo, Dem. Rep.	COD	2.262	..	..	..	..	..	..	3.619	..	..	..	..	..	..	..	1.082	..	..	..	..
Unemployment, female (% of female labor force) (national estimate)	SL.UEM.TOTL.FE.NE.ZS	Congo, Rep.	COG	21.01	..	..	..	17.058	..	..	10.8	..	..	..	..	..	..	..	..	..	..	..	..
Unemployment, female (% of female labor force) (national estimate)	SL.UEM.TOTL.FE.NE.ZS	Costa Rica	CRI	9.813	8.647	6.82	6.256	9.876	9.046	11.932	10.853	9.755	10.528	10.384	10.188	9.757	11.465	14.139	21.286	20.16	15.226	10.251	7.795
Unemployment, female (% of female labor force) (national estimate)	SL.UEM.TOTL.FE.NE.ZS	Cote d'Ivoire	CIV	..	..	..	..	..	..	..	7.329	5.108	..	..	2.344	3.87	..	3.013	..	..	2.554	..	..
Unemployment, female (% of female labor force) (national estimate)	SL.UEM.TOTL.FE.NE.ZS	Croatia	HRV	13.836	12.672	11.34	10.347	10.709	12.306	13.72	15.957	16.708	18.231	16.954	13.721	11.772	9.303	7.056	7.497	7.948	7.866	6.652	5.033
Unemployment, female (% of female labor force) (national estimate)	SL.UEM.TOTL.FE.NE.ZS	Cuba	CUB	2.21	2.215	1.871	1.966	1.99	2.71	3.51	3.58	3.55	3.1	2.6	2.2	1.6	1.8	..	..	..	..	..	..
Unemployment, female (% of female labor force) (national estimate)	SL.UEM.TOTL.FE.NE.ZS	Curacao	CUW	..	..	..	..	..	..	..	..	..	..	..	..	..	15.38	..	20.33	..	..	..	..
Unemployment, female (% of female labor force) (national estimate)	SL.UEM.TOTL.FE.NE.ZS	Cyprus	CYP	6.743	5.46	4.606	4.423	5.71	6.506	7.746	11.335	15.392	15.272	14.892	13.379	11.354	8.883	8.082	7.816	8.002	7.737	5.883	5.136
Unemployment, female (% of female labor force) (national estimate)	SL.UEM.TOTL.FE.NE.ZS	Czechia	CZE	9.793	8.836	6.733	5.612	7.73	8.461	7.895	8.205	8.287	7.394	6.078	4.673	3.583	2.808	2.378	2.954	3.426	2.768	3.048	3.033
Unemployment, female (% of female labor force) (national estimate)	SL.UEM.TOTL.FE.NE.ZS	Denmark	DNK	5.278	4.534	4.199	4.074	5.669	6.763	7.62	7.79	7.673	7.141	6.529	6.379	6.054	5.346	5.269	5.987	5.134	4.493	5.274	6.483
Unemployment, female (% of female labor force) (national estimate)	SL.UEM.TOTL.FE.NE.ZS	Djibouti	DJI	..	..	..	..	..	..	..	..	..	..	..	..	35.898	..	..	..	..	..	..	..
Unemployment, female (% of female labor force) (national estimate)	SL.UEM.TOTL.FE.NE.ZS	Dominica	DMA	..	..	..	..	..	..	..	..	..	..	..	..	..	..	..	..	..	..	..	..
Unemployment, female (% of female labor force) (national estimate)	SL.UEM.TOTL.FE.NE.ZS	Dominican Republic	DOM	9.711	8.864	7.561	7.37	7.889	7.039	8.349	9.208	10.524	9.686	10.836	10.654	8.074	9.028	9.506	8.937	12.277	8.509	8.332	8.128
Unemployment, female (% of female labor force) (national estimate)	SL.UEM.TOTL.FE.NE.ZS	Ecuador	ECU	4.703	4.363	3.904	4.984	5.857	4.95	4.27	3.813	3.653	4.129	4.497	5.812	4.897	4.38	4.583	7.326	5.699	4.38	4.314	4.35
Unemployment, female (% of female labor force) (national estimate)	SL.UEM.TOTL.FE.NE.ZS	Egypt, Arab Rep.	EGY	24.253	23.94	18.42	18.876	22.38	22.112	22.441	24.012	24.166	23.997	24.814	23.639	23.068	21.442	21.665	17.797	16.091	18.516	15.329	..
Unemployment, female (% of female labor force) (national estimate)	SL.UEM.TOTL.FE.NE.ZS	El Salvador	SLV	4.8	3.9	3.73	3.63	4.93	4.162	3.409	3.3	3.331	3.138	3.469	3.849	4.003	3.748	4.383	5.421	4.757	3.295	3.356	..
Unemployment, female (% of female labor force) (national estimate)	SL.UEM.TOTL.FE.NE.ZS	Equatorial Guinea	GNQ	..	..	..	..	..	..	..	..	..	..	..	..	..	..	..	..	..	..	..	..
Unemployment, female (% of female labor force) (national estimate)	SL.UEM.TOTL.FE.NE.ZS	Eritrea	ERI	..	..	..	..	..	..	..	..	..	..	..	..	..	..	..	..	..	..	..	..
Unemployment, female (% of female labor force) (national estimate)	SL.UEM.TOTL.FE.NE.ZS	Estonia	EST	6.911	5.585	3.757	5.138	10.307	14.097	11.579	9.102	8.156	6.814	6.324	6.164	5.245	5.256	4.923	6.771	5.546	5.061	6.636	7.486
Unemployment, female (% of female labor force) (national estimate)	SL.UEM.TOTL.FE.NE.ZS	Eswatini	SWZ	..	..	..	..	..	..	..	..	..	..	..	24.415	..	..	..	..	35.405	..	36.875	..
Unemployment, female (% of female labor force) (national estimate)	SL.UEM.TOTL.FE.NE.ZS	Ethiopia	ETH	3.251	..	..	..	..	..	..	..	2.943	..	..	..	..	..	..	..	5.274	..	..	..
Unemployment, female (% of female labor force) (national estimate)	SL.UEM.TOTL.FE.NE.ZS	Faroe Islands	FRO	..	..	..	..	..	..	..	..	..	..	..	..	..	..	..	..	..	..	..	..
Unemployment, female (% of female labor force) (national estimate)	SL.UEM.TOTL.FE.NE.ZS	Fiji	FJI	5.159	..	12.68	..	..	..	4.615	..	..	8.51	..	5.54	..	..	..	..	..	..	..	7.065
Unemployment, female (% of female labor force) (national estimate)	SL.UEM.TOTL.FE.NE.ZS	Finland	FIN	9.65	9.134	7.191	6.689	7.574	7.642	7.105	7.055	7.519	7.954	8.844	8.583	8.389	7.298	6.174	7.486	7.044	6.368	6.414	7.534
Unemployment, female (% of female labor force) (national estimate)	SL.UEM.TOTL.FE.NE.ZS	France	FRA	9.84	9.674	8.595	7.914	9.359	9.647	9.709	9.967	9.775	10.006	9.878	9.853	9.373	9.056	8.351	7.951	7.769	7.129	7.206	7.239
Unemployment, female (% of female labor force) (national estimate)	SL.UEM.TOTL.FE.NE.ZS	French Polynesia	PYF	..	..	12.8	..	..	..	..	..	..	..	..	..	..	..	..	..	..	..	..	..
Unemployment, female (% of female labor force) (national estimate)	SL.UEM.TOTL.FE.NE.ZS	Gabon	GAB	22.37	..	..	..	..	28.52	..	..	..	..	..	..	..	..	..	..	..	..	..	..
Unemployment, female (% of female labor force) (national estimate)	SL.UEM.TOTL.FE.NE.ZS	Gambia, The	GMB	..	..	..	..	..	..	..	12.585	..	..	..	..	..	3.137	..	..	..	..	5.813	..
Unemployment, female (% of female labor force) (national estimate)	SL.UEM.TOTL.FE.NE.ZS	Georgia	GEO	12.66	11.65	12.59	17.59	19.08	17.562	17.403	18.368	16.179	14.475	13.923	12.553	12.74	11.229	10.146	10.213	..	..	..	..
Unemployment, female (% of female labor force) (national estimate)	SL.UEM.TOTL.FE.NE.ZS	Germany	DEU	10.941	10.273	8.772	7.723	7.488	6.594	5.708	5.226	4.99	4.631	4.206	3.723	3.316	2.903	2.725	3.488	3.14	2.872	2.858	3.129
Unemployment, female (% of female labor force) (national estimate)	SL.UEM.TOTL.FE.NE.ZS	Ghana	GHA	..	5.156	..	..	..	5.833	..	..	2.36	..	6.596	..	3.477	..	..	..	3.594	3.123	..	..
Unemployment, female (% of female labor force) (national estimate)	SL.UEM.TOTL.FE.NE.ZS	Gibraltar	GIB	..	..	..	..	..	..	..	..	..	..	..	..	..	..	..	..	..	..	..	..
Unemployment, female (% of female labor force) (national estimate)	SL.UEM.TOTL.FE.NE.ZS	Greece	GRC	15.64	13.739	12.916	11.355	13.248	16.404	21.694	28.58	31.654	30.506	29.027	28.064	26.032	24.111	21.197	19.248	18.876	16.397	14.267	12.665
Unemployment, female (% of female labor force) (national estimate)	SL.UEM.TOTL.FE.NE.ZS	Greenland	GRL	8.02	6.7	..	..	..	7.7	9.6	10.2	10.1	10.3	9.3	..	..	..	..	..	..	..	..	..
Unemployment, female (% of female labor force) (national estimate)	SL.UEM.TOTL.FE.NE.ZS	Grenada	GRD	..	..	..	..	..	..	..	..	..	..	..	..	..	14.992	11.141	15.961	14.669	..	9.042	..
Unemployment, female (% of female labor force) (national estimate)	SL.UEM.TOTL.FE.NE.ZS	Guam	GUM	7.7	7.5	9.9	..	9.8	9.3	15.7	10.8	..	..	..	..	..	..	..	..	..	..	..	..
Unemployment, female (% of female labor force) (national estimate)	SL.UEM.TOTL.FE.NE.ZS	Guatemala	GTM	..	2.468	..	..	..	3.832	6.614	3.443	3.642	3.366	3.528	3.454	3.502	2.801	2.912	..	2.836	4.54	2.917	..
Unemployment, female (% of female labor force) (national estimate)	SL.UEM.TOTL.FE.NE.ZS	Guinea	GIN	..	..	..	..	..	..	..	..	..	4.104	..	..	..	..	5.061	..	..	..	..	..
Unemployment, female (% of female labor force) (national estimate)	SL.UEM.TOTL.FE.NE.ZS	Guinea-Bissau	GNB	..	..	..	..	..	..	..	..	..	..	..	..	..	2.793	1.076	..	..	1.859	..	..
Unemployment, female (% of female labor force) (national estimate)	SL.UEM.TOTL.FE.NE.ZS	Guyana	GUY	..	..	..	..	..	..	..	..	..	..	..	..	..	15.986	14.653	..	..	..	..	..
Unemployment, female (% of female labor force) (national estimate)	SL.UEM.TOTL.FE.NE.ZS	Haiti	HTI	..	..	19.2	..	..	..	..	17.3	..	..	..	..	..	..	..	..	..	..	..	..
Unemployment, female (% of female labor force) (national estimate)	SL.UEM.TOTL.FE.NE.ZS	Honduras	HND	6.383	4.394	4.283	3.84	4.259	5.398	6.307	5.12	7.45	9.246	8.765	8.882	7.85	7.17	8.06	13.821	10.645	12.765	8.602	6.34
Unemployment, female (% of female labor force) (national estimate)	SL.UEM.TOTL.FE.NE.ZS	Hong Kong SAR, China	HKG	4.42	3.72	3.36	2.97	4.32	3.502	2.797	2.756	2.97	3.009	3.185	3.081	2.862	2.421	2.298	4.74	4.223	3.523	2.417	2.366
Unemployment, female (% of female labor force) (national estimate)	SL.UEM.TOTL.FE.NE.ZS	Hungary	HUN	7.427	7.912	7.734	8.004	9.741	10.663	10.984	10.611	10.136	7.913	7.039	5.108	4.571	3.932	3.509	4.437	4.204	3.476	4.156	4.388
Unemployment, female (% of female labor force) (national estimate)	SL.UEM.TOTL.FE.NE.ZS	Iceland	ISL	2.491	3.06	2.268	2.581	5.683	6.737	6.211	5.665	5.077	4.786	4.051	3.046	2.718	2.536	3.111	5.292	6.364	3.385	3.098	3.324
Unemployment, female (% of female labor force) (national estimate)	SL.UEM.TOTL.FE.NE.ZS	India	IND	4.002	..	..	..	..	3.788	..	3.738	..	..	..	..	..	7.715	6.072	6.763	5.402	4.588	4.063	4.091
Unemployment, female (% of female labor force) (national estimate)	SL.UEM.TOTL.FE.NE.ZS	Indonesia	IDN	10.065	9.286	9.906	8.101	6.696	6.391	5.565	4.784	4.266	3.883	4.43	3.865	3.484	4.184	3.35	3.772	3.153	3.155	3.081	..
Unemployment, female (% of female labor force) (national estimate)	SL.UEM.TOTL.FE.NE.ZS	Iran, Islamic Rep.	IRN	17.608	16.508	16.097	16.918	17.04	20.74	21.063	19.787	19.874	19.764	19.503	20.776	19.924	18.965	17.547	15.668	16.011	15.823	15.018	..
Unemployment, female (% of female labor force) (national estimate)	SL.UEM.TOTL.FE.NE.ZS	Iraq	IRQ	..	..	7.439	..	..	..	..	12.424	..	21.92	..	22.22	30.96	..	..	..	28.308	..	..	..
Unemployment, female (% of female labor force) (national estimate)	SL.UEM.TOTL.FE.NE.ZS	Ireland	IRL	3.796	4.1	4.928	5.702	9.509	11.41	12.5	12.753	12.419	10.875	8.908	7.598	6.294	5.691	4.685	5.649	6.367	4.641	4.216	4.29
Unemployment, female (% of female labor force) (national estimate)	SL.UEM.TOTL.FE.NE.ZS	Isle of Man	IMN	0.9	1.96	1.1	1	..	..	2.76	..	1.711	1.26	..	2.26	..	..	..	..	..	..	..	..
Unemployment, female (% of female labor force) (national estimate)	SL.UEM.TOTL.FE.NE.ZS	Israel	ISR	9.53	8.987	7.944	6.505	7.649	6.497	5.62	6.873	6.174	5.804	5.309	4.864	4.24	3.878	3.845	3.974	4.732	3.582	3.196	2.782
Unemployment, female (% of female labor force) (national estimate)	SL.UEM.TOTL.FE.NE.ZS	Italy	ITA	10.044	8.774	7.84	8.496	9.223	9.598	9.544	11.826	13.067	13.798	12.694	12.774	12.387	11.707	11.03	10.23	10.625	9.349	8.759	7.338
Unemployment, female (% of female labor force) (national estimate)	SL.UEM.TOTL.FE.NE.ZS	Jamaica	JAM	15.799	14.457	14.283	8.86	9.108	9.759	10.254	11.209	12.57	11.649	17.857	11.372	9.706	6.949	6.364	7.432	6.335	5.128	3.924	..
Unemployment, female (% of female labor force) (national estimate)	SL.UEM.TOTL.FE.NE.ZS	Japan	JPN	4.218	3.925	3.766	3.855	4.784	4.606	4.15	4.052	3.685	3.368	3.092	2.836	2.646	2.233	2.168	2.532	2.527	2.353	2.3	2.4
Unemployment, female (% of female labor force) (national estimate)	SL.UEM.TOTL.FE.NE.ZS	Jordan	JOR	25.9	25	25.6	24.4	24.1	21.7	21.2	19.9	22.2	20.7	22.55	24.125	27.164	24.116	24.115	25.442	26.227	26.956	23.132	..
Unemployment, female (% of female labor force) (national estimate)	SL.UEM.TOTL.FE.NE.ZS	Kazakhstan	KAZ	..	..	..	7.95	7.54	6.63	6.21	6.47	5.87	..	..	..	5.43	..	..	5.37	..	5.5	..	..
Unemployment, female (% of female labor force) (national estimate)	SL.UEM.TOTL.FE.NE.ZS	Kenya	KEN	10.133	..	..	..	9.4	..	..	..	..	..	..	2.937	..	..	5.265	..	7.405	6.88	..	..
Unemployment, female (% of female labor force) (national estimate)	SL.UEM.TOTL.FE.NE.ZS	Kiribati	KIR	18.24	..	..	..	..	34.09	..	..	..	..	5.637	..	..	..	8.674	12.338	..	..	3.695	..
Unemployment, female (% of female labor force) (national estimate)	SL.UEM.TOTL.FE.NE.ZS	Korea, Dem. People's Rep.	PRK	..	..	..	..	..	..	..	..	..	..	..	..	..	..	..	..	..	..	..	..
Unemployment, female (% of female labor force) (national estimate)	SL.UEM.TOTL.FE.NE.ZS	Korea, Rep.	KOR	3.099	2.713	2.403	2.405	2.687	2.841	2.643	2.556	2.795	2.962	3.483	3.538	3.484	3.692	3.582	3.99	3.74	3.031	2.722	2.822
Unemployment, female (% of female labor force) (national estimate)	SL.UEM.TOTL.FE.NE.ZS	Kosovo	XKX	60.5	61.6	55.2	59.6	56.4	..	..	39.956	38.516	41.566	36.505	31.706	36.395	31.28	34.028	32.053	24.798	15.919	17.793	..
Unemployment, female (% of female labor force) (national estimate)	SL.UEM.TOTL.FE.NE.ZS	Kuwait	KWT	1.81	2.9	3.1	3.73	3.39	2.8	..	..	..	4.9	4.4	5.83	..	..	..	..	..	..	..	..
Unemployment, female (% of female labor force) (national estimate)	SL.UEM.TOTL.FE.NE.ZS	Kyrgyz Republic	KGZ	9.05	9.03	..	9.38	9.76	9.971	8.889	6.996	6.465	6.146	5.027	4.685	3.465	5.008	6.306	6.991	6.104	6.048	4.197	..
Unemployment, female (% of female labor force) (national estimate)	SL.UEM.TOTL.FE.NE.ZS	Lao PDR	LAO	1.36	..	..	..	..	0.661	..	..	..	..	1.963	..	2.753	..	..	..	..	0.892	..	..
Unemployment, female (% of female labor force) (national estimate)	SL.UEM.TOTL.FE.NE.ZS	Latvia	LVA	9.971	6.737	5.568	7.077	14.14	16.305	13.801	13.951	11.143	9.84	8.641	8.403	7.678	6.42	5.428	7.07	6.539	5.517	5.436	5.776
Unemployment, female (% of female labor force) (national estimate)	SL.UEM.TOTL.FE.NE.ZS	Lebanon	LBN	..	..	10.14	..	10.396	..	..	..	..	..	..	..	..	..	14.311	..	..	..	..	..
Unemployment, female (% of female labor force) (national estimate)	SL.UEM.TOTL.FE.NE.ZS	Lesotho	LSO	..	..	..	38.79	..	..	..	..	..	..	..	..	..	..	19.106	..	..	..	..	21.739
Unemployment, female (% of female labor force) (national estimate)	SL.UEM.TOTL.FE.NE.ZS	Liberia	LBR	..	..	..	..	..	2.288	..	..	..	1.796	..	2.358	5.633	..	..	..	..	..	..	..
Unemployment, female (% of female labor force) (national estimate)	SL.UEM.TOTL.FE.NE.ZS	Libya	LBY	..	..	..	..	..	..	..	25.05	..	..	..	..	..	..	..	..	..	..	..	..
Unemployment, female (% of female labor force) (national estimate)	SL.UEM.TOTL.FE.NE.ZS	Liechtenstein	LIE	..	..	2.53	..	..	..	..	..	..	..	..	..	..	..	..	..	..	..	..	..
Unemployment, female (% of female labor force) (national estimate)	SL.UEM.TOTL.FE.NE.ZS	Lithuania	LTU	8.535	5.611	4.329	5.628	10.521	14.519	12.91	11.573	10.478	9.221	8.161	6.653	5.676	5.409	5.494	7.691	6.606	5.487	6.376	6.426
Unemployment, female (% of female labor force) (national estimate)	SL.UEM.TOTL.FE.NE.ZS	Luxembourg	LUX	5.824	6.246	4.712	6.03	6.264	5.185	6.531	5.742	6.543	6.259	7.193	6.953	5.499	5.882	5.525	6.954	6.006	4.739	5.435	6.258
Unemployment, female (% of female labor force) (national estimate)	SL.UEM.TOTL.FE.NE.ZS	Macao SAR, China	MAC	3.8	3.8	2.9	2.8	2.79	2.06	2.18	1.65	1.4	1.39	1.57	1.5	1.568	1.346	1.337	2.2	..	..	..	..
Unemployment, female (% of female labor force) (national estimate)	SL.UEM.TOTL.FE.NE.ZS	Madagascar	MDG	3.49	..	..	..	..	5.31	..	0.627	..	..	1.801	..	..	..	..	..	..	3.457	..	..
Unemployment, female (% of female labor force) (national estimate)	SL.UEM.TOTL.FE.NE.ZS	Malawi	MWI	0.76	..	..	..	..	..	1.764	..	5.84	..	..	..	4.405	..	..	1.057	..	..	..	..
Unemployment, female (% of female labor force) (national estimate)	SL.UEM.TOTL.FE.NE.ZS	Malaysia	MYS	3.71	..	..	..	..	..	3.32	..	..	3.22	3.39	3.92	..	3.63	..	4.68	4.78	4.11	..	..
Unemployment, female (% of female labor force) (national estimate)	SL.UEM.TOTL.FE.NE.ZS	Maldives	MDV	..	..	..	..	13.748	..	..	..	..	5.412	..	5.257	..	..	3.934	..	..	..	..	..
Unemployment, female (% of female labor force) (national estimate)	SL.UEM.TOTL.FE.NE.ZS	Mali	MLI	..	..	12.77	..	1.579	11.11	..	..	8.244	6.295	8.737	1.299	8.341	1.558	3.655	3.544	..	3.213	..	..
Unemployment, female (% of female labor force) (national estimate)	SL.UEM.TOTL.FE.NE.ZS	Malta	MLT	8.363	8.316	7.896	6.777	7.64	7.138	7.13	7.21	6.141	5.108	5.389	5.166	4.255	3.713	4.681	5.146	3.564	3.14	3.197	2.953
Unemployment, female (% of female labor force) (national estimate)	SL.UEM.TOTL.FE.NE.ZS	Marshall Islands	MHL	..	..	..	..	..	..	4.48	..	..	..	..	..	..	..	4.277	..	11.458	..	..	..
Unemployment, female (% of female labor force) (national estimate)	SL.UEM.TOTL.FE.NE.ZS	Mauritania	MRT	..	..	..	..	..	..	..	12.4	..	..	..	..	11.445	..	14.853	..	..	..	..	..
Unemployment, female (% of female labor force) (national estimate)	SL.UEM.TOTL.FE.NE.ZS	Mauritius	MUS	16.338	15.511	14.374	12.593	12.27	12.916	11.714	11.715	11.15	10.826	10.683	10.406	10.039	9.51	9.684	10.155	8.643	8.473	7.441	..
Unemployment, female (% of female labor force) (national estimate)	SL.UEM.TOTL.FE.NE.ZS	Mexico	MEX	3.901	3.882	3.992	4.034	5.353	5.185	5.133	4.88	4.96	4.857	4.455	3.903	3.597	3.409	3.515	4.038	4.02	3.23	2.741	2.637
Unemployment, female (% of female labor force) (national estimate)	SL.UEM.TOTL.FE.NE.ZS	Micronesia, Fed. Sts.	FSM	..	..	..	..	..	..	..	..	..	13.878	..	..	..	..	..	..	..	..	..	..
Unemployment, female (% of female labor force) (national estimate)	SL.UEM.TOTL.FE.NE.ZS	Moldova	MDA	4.58	2.974	1.955	1.745	2.314	2.208	2.167	1.656	1.508	1.098	1.328	0.969	1.335	1.071	1.174	0.948	0.496	0.693	1.227	1.229
Unemployment, female (% of female labor force) (national estimate)	SL.UEM.TOTL.FE.NE.ZS	Monaco	MCO	..	..	..	..	..	..	..	..	..	..	..	8.68	..	..	..	..	..	..	..	..
Unemployment, female (% of female labor force) (national estimate)	SL.UEM.TOTL.FE.NE.ZS	Mongolia	MNG	..	7.138	7.1	5.185	6.163	5.904	4.43	3.527	4.46	4.409	4.263	5.899	5.657	4.826	8.063	6.275	7.403	4.911	4.366	..
Unemployment, female (% of female labor force) (national estimate)	SL.UEM.TOTL.FE.NE.ZS	Montenegro	MNE	35.53	..	20.9	18.37	20.43	20.75	20.084	20.381	18.93	18.247	17.307	17.096	16.956	15.12	15.694	18.382	15.843	13.008	14.167	..
Unemployment, female (% of female labor force) (national estimate)	SL.UEM.TOTL.FE.NE.ZS	Morocco	MAR	11.55	9.67	9.43	9.78	9.28	9.48	10.22	9.94	9.57	10.28	10.39	10.66	..	..	..	..	16.72	17.15	..	..
Unemployment, female (% of female labor force) (national estimate)	SL.UEM.TOTL.FE.NE.ZS	Mozambique	MOZ	..	..	..	..	..	..	..	..	..	..	3.67	..	..	..	..	..	..	7.452	..	..
Unemployment, female (% of female labor force) (national estimate)	SL.UEM.TOTL.FE.NE.ZS	Myanmar	MMR	..	..	..	..	..	..	..	..	..	4.019	0.898	..	1.776	0.955	0.473	2.116	..	..	..	..
Unemployment, female (% of female labor force) (national estimate)	SL.UEM.TOTL.FE.NE.ZS	Namibia	NAM	..	..	..	..	..	23.963	..	18.974	20.659	20.376	..	24.977	..	18.59	..	..	..	..	..	..
Unemployment, female (% of female labor force) (national estimate)	SL.UEM.TOTL.FE.NE.ZS	Nauru	NRU	..	9.126	..	..	..	..	25.51	..	17.954	..	..	..	..	..	..	..	5.23	..	..	..
Unemployment, female (% of female labor force) (national estimate)	SL.UEM.TOTL.FE.NE.ZS	Nepal	NPL	..	..	..	1.096	..	..	..	..	..	..	2.9	..	12.02	..	..	..	..	..	..	..
Unemployment, female (% of female labor force) (national estimate)	SL.UEM.TOTL.FE.NE.ZS	Netherlands	NLD	6.914	6.157	5.204	4.477	4.92	5.546	5.413	6.228	7.303	7.747	7.274	6.501	5.256	3.956	3.355	3.953	4.499	3.814	3.744	3.833
Unemployment, female (% of female labor force) (national estimate)	SL.UEM.TOTL.FE.NE.ZS	New Caledonia	NCL	..	..	..	..	16.34	..	..	..	..	15.6	..	..	13.501	11.811	11.575	12.918	..	10.967	..	..
Unemployment, female (% of female labor force) (national estimate)	SL.UEM.TOTL.FE.NE.ZS	New Zealand	NZL	4.15	4.2	3.886	4.128	5.831	6.482	6.218	6.769	6.431	6.121	5.899	5.52	5.247	4.495	4.426	4.984	3.884	3.529	3.971	4.917
Unemployment, female (% of female labor force) (national estimate)	SL.UEM.TOTL.FE.NE.ZS	Nicaragua	NIC	5.77	4.98	5.04	6.9	..	..	..	5.731	5.45	5.612	5.4	4.2	3.4	5.3	..	..	..	..	..	..
Unemployment, female (% of female labor force) (national estimate)	SL.UEM.TOTL.FE.NE.ZS	Niger	NER	2.7	..	..	..	..	..	0.221	3.709	..	0.433	..	..	7.788	..	0.457	..	..	0.29	..	..
Unemployment, female (% of female labor force) (national estimate)	SL.UEM.TOTL.FE.NE.ZS	Nigeria	NGA	..	..	..	..	..	..	3.692	..	3.384	5.352	5.055	8.029	9.153	..	12.481	..	..	5.327	4.073	4.231
Unemployment, female (% of female labor force) (national estimate)	SL.UEM.TOTL.FE.NE.ZS	North Macedonia	MKD	38.109	37.414	35.968	34.403	32.845	33.58	30.861	30.479	29.034	28.874	25.329	23.218	22.316	20.282	18.506	16.111	14.651	12.496	11.437	10.967
Unemployment, female (% of female labor force) (national estimate)	SL.UEM.TOTL.FE.NE.ZS	Northern Mariana Islands	MNP	5.71	..	..	..	..	13.05	..	..	..	..	..	..	..	..	..	..	..	..	..	..
Unemployment, female (% of female labor force) (national estimate)	SL.UEM.TOTL.FE.NE.ZS	Norway	NOR	4.192	3.344	2.423	2.315	2.603	2.942	2.991	2.633	3.231	3.235	3.998	3.912	3.696	3.538	3.392	4.133	4.119	3.067	3.455	3.807
Unemployment, female (% of female labor force) (national estimate)	SL.UEM.TOTL.FE.NE.ZS	Oman	OMN	..	..	..	8.089	..	..	..	..	..	..	..	13.675	..	7.1	..	9.68	5.6	10.3	..	..
Unemployment, female (% of female labor force) (national estimate)	SL.UEM.TOTL.FE.NE.ZS	Pakistan	PAK	12.06	0.324	0.245	0.533	0.359	0.639	0.67	3.772	3.421	2.011	6.109	2.711	..	4.55	6.255	14.279	9.157	..	..	..
Unemployment, female (% of female labor force) (national estimate)	SL.UEM.TOTL.FE.NE.ZS	Palau	PLW	4.86	..	..	..	..	..	..	..	..	1.753	..	..	..	..	..	1.04	..	..	..	..
Unemployment, female (% of female labor force) (national estimate)	SL.UEM.TOTL.FE.NE.ZS	Panama	PAN	13.95	12.37	9.27	7.188	8.85	7.59	4.473	4.635	4.81	5.645	5.348	5.903	6.938	6.752	7.988	24.667	10.626	9.826	8.567	11.259
Unemployment, female (% of female labor force) (national estimate)	SL.UEM.TOTL.FE.NE.ZS	Papua New Guinea	PNG	..	..	..	..	..	1.276	1.44	..	..	..	..	..	..	..	..	..	..	2.19	..	..
Unemployment, female (% of female labor force) (national estimate)	SL.UEM.TOTL.FE.NE.ZS	Paraguay	PRY	6.251	6.65	6.613	5.961	6.648	6.05	6.357	5.432	4.955	6.762	4.934	6.706	7.78	7.519	8.289	9.934	9.535	8.238	7.315	7.328
Unemployment, female (% of female labor force) (national estimate)	SL.UEM.TOTL.FE.NE.ZS	Peru	PER	5.031	4.871	4.605	4.622	4.2	4.16	3.82	3.722	3.957	3.406	3.347	3.977	3.914	3.88	3.739	6.992	5.556	5.248	5.798	6.122
Unemployment, female (% of female labor force) (national estimate)	SL.UEM.TOTL.FE.NE.ZS	Philippines	PHL	4.2	4.33	3.716	4.006	4.131	3.789	3.828	3.733	3.823	3.724	3.219	2.848	2.703	2.678	2.533	2.721	3.828	2.864	2.615	..
Unemployment, female (% of female labor force) (national estimate)	SL.UEM.TOTL.FE.NE.ZS	Poland	POL	19.041	14.819	10.228	7.838	8.547	9.87	10.241	10.762	11.004	9.521	7.644	6.175	4.861	3.821	3.57	3.276	3.282	2.851	2.788	2.998
Unemployment, female (% of female labor force) (national estimate)	SL.UEM.TOTL.FE.NE.ZS	Portugal	PRT	8.633	8.905	9.492	8.751	10.092	11.864	13.121	15.491	16.446	14.271	12.669	11.122	9.363	7.381	7.063	7.08	6.992	6.564	6.862	6.833
Unemployment, female (% of female labor force) (national estimate)	SL.UEM.TOTL.FE.NE.ZS	Puerto Rico (US)	PRI	10.08	10.42	9.53	9.66	12.5	12.7	12.8	12	..	..	9.7	..	..	..	..	15.672	..	..	..	..
Unemployment, female (% of female labor force) (national estimate)	SL.UEM.TOTL.FE.NE.ZS	Qatar	QAT	..	..	2.64	1.69	1.92	2.7	3.32	2.82	1.63	1.03	0.85	0.7	0.62	0.44	0.44	0.54	0.45	0.4	..	..
Unemployment, female (% of female labor force) (national estimate)	SL.UEM.TOTL.FE.NE.ZS	Romania	ROU	6.429	6.112	5.409	4.67	5.839	6.175	6.464	6.077	6.305	6.093	5.848	4.981	4.037	3.485	3.375	4.689	5.045	5.045	5.12	5.048
Unemployment, female (% of female labor force) (national estimate)	SL.UEM.TOTL.FE.NE.ZS	Russian Federation	RUS	7.018	6.82	5.758	6.068	7.855	6.874	6.133	5.122	5.192	4.873	5.352	5.382	5.072	4.801	4.356	5.574	4.833	3.961	3.188	2.522
Unemployment, female (% of female labor force) (national estimate)	SL.UEM.TOTL.FE.NE.ZS	Rwanda	RWA	..	..	..	..	..	..	..	..	..	1.242	..	..	12.632	11.345	12.065	12.887	17.421	16.593	14.324	13.251
Unemployment, female (% of female labor force) (national estimate)	SL.UEM.TOTL.FE.NE.ZS	Samoa	WSM	..	1.63	..	..	..	..	6.82	10.264	..	10.27	..	..	14.511	..	..	..	..	7.767	..	..
Unemployment, female (% of female labor force) (national estimate)	SL.UEM.TOTL.FE.NE.ZS	San Marino	SMR	2.55	2.03	..	..	6.26	7.29	..	7.47	8.7	9.47	10.95	10.03	10.82	10.81	10.38	9.93	9.14	6.87	..	..
Unemployment, female (% of female labor force) (national estimate)	SL.UEM.TOTL.FE.NE.ZS	Sao Tome and Principe	STP	24.59	24.51	..	..	..	..	..	..	..	..	..	..	8.906	..	..	..	..	..	..	..
Unemployment, female (% of female labor force) (national estimate)	SL.UEM.TOTL.FE.NE.ZS	Saudi Arabia	SAU	14.071	14.691	14.214	13.778	15.938	17.38	..	20.538	20.7	21.957	21.4	21.1	21.298	20.873	21.026	22.766	17.275	15.356	12.773	11.206
Unemployment, female (% of female labor force) (national estimate)	SL.UEM.TOTL.FE.NE.ZS	Senegal	SEN	..	13.64	..	..	..	..	3.046	..	..	..	7.302	4.745	3.642	..	3.046	..	..	7.55	5.902	7.089
Unemployment, female (% of female labor force) (national estimate)	SL.UEM.TOTL.FE.NE.ZS	Serbia	SRB	26.21	24.71	21.03	15.955	17.832	20.229	23.699	24.982	23.84	20.373	18.761	16.1	14.274	13.7	11.076	9.412	10.684	8.883	8.651	7.44
Unemployment, female (% of female labor force) (national estimate)	SL.UEM.TOTL.FE.NE.ZS	Seychelles	SYC	4.9	..	..	..	..	..	4.48	..	..	3.901	4.787	4.228	3.727	3.113	2.747	3.555	..	..	2.414	2.767
Unemployment, female (% of female labor force) (national estimate)	SL.UEM.TOTL.FE.NE.ZS	Sierra Leone	SLE	..	..	..	..	..	..	..	..	..	3.878	..	..	..	2.184	..	..	..	..	..	..
Unemployment, female (% of female labor force) (national estimate)	SL.UEM.TOTL.FE.NE.ZS	Singapore	SGP	..	4.94	4.36	4.38	6.51	4.4	4.32	4.2	4.38	4.09	3.96	4.48	4.4	..	3.4	4.4	4.99	3.816	3.687	2.699
Unemployment, female (% of female labor force) (national estimate)	SL.UEM.TOTL.FE.NE.ZS	Sint Maarten (Dutch part)	SXM	..	..	..	..	..	..	..	..	..	..	..	..	..	..	..	..	..	..	..	..
Unemployment, female (% of female labor force) (national estimate)	SL.UEM.TOTL.FE.NE.ZS	Slovak Republic	SVK	17.256	14.758	12.679	10.94	12.829	14.599	13.66	14.531	14.522	12.949	12.902	10.778	8.413	7.036	5.958	7.1	7.137	6.383	5.936	5.939
Unemployment, female (% of female labor force) (national estimate)	SL.UEM.TOTL.FE.NE.ZS	Slovenia	SVN	7.034	7.188	5.833	4.822	5.806	7.019	8.173	9.369	10.908	10.548	10.036	8.586	7.475	5.697	4.955	5.628	5.317	4.318	3.714	3.98
Unemployment, female (% of female labor force) (national estimate)	SL.UEM.TOTL.FE.NE.ZS	Solomon Islands	SLB	..	..	..	..	1.76	..	..	..	0.723	..	..	..	..	..	..	..	..	..	..	..
Unemployment, female (% of female labor force) (national estimate)	SL.UEM.TOTL.FE.NE.ZS	Somalia, Fed. Rep.	SOM	..	..	..	..	..	..	..	..	..	..	..	..	..	..	24.175	..	..	..	..	..
Unemployment, female (% of female labor force) (national estimate)	SL.UEM.TOTL.FE.NE.ZS	South Africa	ZAF	36.499	35.887	33.168	25.739	25.539	26.985	27.192	27.054	26.519	27.016	27.522	28.983	29.255	29.045	30.503	31.022	36.324	35.401	34.58	34.448
Unemployment, female (% of female labor force) (national estimate)	SL.UEM.TOTL.FE.NE.ZS	South Sudan	SSD	..	..	..	13.475	..	..	..	..	..	..	..	..	..	..	..	..	..	..	..	..
Unemployment, female (% of female labor force) (national estimate)	SL.UEM.TOTL.FE.NE.ZS	Spain	ESP	11.986	11.344	10.698	12.839	18.127	20.225	21.812	25.034	26.672	25.425	23.548	21.38	19.027	17.023	15.995	17.428	16.833	14.887	13.872	12.678
Unemployment, female (% of female labor force) (national estimate)	SL.UEM.TOTL.FE.NE.ZS	Sri Lanka	LKA	11.89	9.68	9.03	8.03	8.62	7.399	6.914	6.1	6.43	6.243	7.33	6.72	6.236	6.881	7.252	8.184	7.615	6.218	..	..
Unemployment, female (% of female labor force) (national estimate)	SL.UEM.TOTL.FE.NE.ZS	St. Kitts and Nevis	KNA	..	..	..	..	..	..	..	..	..	..	..	..	..	..	..	..	..	..	..	..
Unemployment, female (% of female labor force) (national estimate)	SL.UEM.TOTL.FE.NE.ZS	St. Lucia	LCA	22.9	20.3	18.5	14.75	16.46	..	20.22	21.19	23.93	..	..	..	20.883	20.889	17.013	22.125	21.537	17.637	13.53	11.086
Unemployment, female (% of female labor force) (national estimate)	SL.UEM.TOTL.FE.NE.ZS	St. Martin (French part)	MAF	..	..	..	..	..	..	..	..	..	..	..	..	..	..	..	..	..	..	..	..
Unemployment, female (% of female labor force) (national estimate)	SL.UEM.TOTL.FE.NE.ZS	St. Vincent and the Grenadines	VCT	..	..	..	..	..	..	..	..	..	..	..	..	..	..	..	..	..	..	..	..
Unemployment, female (% of female labor force) (national estimate)	SL.UEM.TOTL.FE.NE.ZS	Sudan	SDN	..	..	..	23.139	23	..	30.736	..	..	..	..	..	..	..	..	..	..	14.08	..	..
Unemployment, female (% of female labor force) (national estimate)	SL.UEM.TOTL.FE.NE.ZS	Suriname	SUR	..	..	..	..	14.33	12.58	12.41	12.37	11.01	11.81	11.45	11.108	..	..	..	..	..	..	..	..
Unemployment, female (% of female labor force) (national estimate)	SL.UEM.TOTL.FE.NE.ZS	Sweden	SWE	7.728	7.255	6.466	6.565	8.012	8.521	7.763	7.711	7.888	7.694	7.29	6.586	6.441	6.236	6.956	8.285	9.13	7.892	7.866	8.47
Unemployment, female (% of female labor force) (national estimate)	SL.UEM.TOTL.FE.NE.ZS	Switzerland	CHE	5.092	4.7	4.507	3.969	4.511	5.197	4.798	4.737	4.918	4.986	4.912	5.006	5.058	5.109	4.711	5	5.236	4.382	4.283	4.56
Unemployment, female (% of female labor force) (national estimate)	SL.UEM.TOTL.FE.NE.ZS	Syrian Arab Republic	SYR	..	23.77	25.68	24.19	22.29	22	..	..	..	..	..	..	..	..	..	..	..	..	..	..
Unemployment, female (% of female labor force) (national estimate)	SL.UEM.TOTL.FE.NE.ZS	Tajikistan	TJK	..	..	1.466	..	10.48	..	..	..	..	..	..	..	..	..	..	..	..	..	..	..
Unemployment, female (% of female labor force) (national estimate)	SL.UEM.TOTL.FE.NE.ZS	Tanzania	TZA	..	4.419	..	0.152	2.7	1.216	4.29	1.848	3.79	2.693	..	..	..	..	..	2.455	..	..	..	..
Unemployment, female (% of female labor force) (national estimate)	SL.UEM.TOTL.FE.NE.ZS	Thailand	THA	1.21	1.12	1.06	1.04	1.45	0.622	0.68	0.53	0.237	0.564	0.606	0.714	0.845	0.743	0.732	1.087	1.249	1.056	0.807	0.826
Unemployment, female (% of female labor force) (national estimate)	SL.UEM.TOTL.FE.NE.ZS	Timor-Leste	TLS	..	..	7.129	..	..	4.261	..	..	3.967	..	3.011	6.256	..	..	..	..	3.002	1.555	..	..
Unemployment, female (% of female labor force) (national estimate)	SL.UEM.TOTL.FE.NE.ZS	Togo	TGO	..	4.165	..	..	..	11.265	1.664	..	..	..	1.704	..	2.824	..	1.814	..	..	2.1	..	..
Unemployment, female (% of female labor force) (national estimate)	SL.UEM.TOTL.FE.NE.ZS	Tonga	TON	..	..	..	..	..	..	..	..	..	..	..	1.255	..	3.111	..	..	2.516	..	2.33	..
Unemployment, female (% of female labor force) (national estimate)	SL.UEM.TOTL.FE.NE.ZS	Trinidad and Tobago	TTO	10.97	8.72	7.92	6.18	6.29	4.67	4.249	4.572	3.248	2.936	2.947	3.165	..	..	4.047	4.822	5.257	4.983	3.871	..
Unemployment, female (% of female labor force) (national estimate)	SL.UEM.TOTL.FE.NE.ZS	Tunisia	TUN	15.16	15.139	15.153	15.938	18.77	18.94	27.373	25.606	23.002	21.84	22.212	23.456	22.629	22.761	25.212	..	..	20.153	20.45	..
Unemployment, female (% of female labor force) (national estimate)	SL.UEM.TOTL.FE.NE.ZS	Turkiye	TUR	11.169	11.116	10.978	11.597	14.298	12.983	11.266	10.781	11.906	11.917	12.646	13.742	14.082	13.891	16.488	14.969	14.721	13.406	12.647	11.781
Unemployment, female (% of female labor force) (national estimate)	SL.UEM.TOTL.FE.NE.ZS	Turkmenistan	TKM	..	..	..	..	1.8	2.3	..	..	..	..	..	..	..	..	..	..	..	..	..	..
Unemployment, female (% of female labor force) (national estimate)	SL.UEM.TOTL.FE.NE.ZS	Turks and Caicos Islands	TCA	..	..	..	..	..	..	..	..	..	..	..	..	..	..	..	..	..	..	..	..
Unemployment, female (% of female labor force) (national estimate)	SL.UEM.TOTL.FE.NE.ZS	Tuvalu	TUV	..	..	..	..	..	5.27	..	..	..	..	..	16.223	28.209	..	..	..	..	8.274	..	..
Unemployment, female (% of female labor force) (national estimate)	SL.UEM.TOTL.FE.NE.ZS	Uganda	UGA	2.1	..	..	..	..	1.518	1.032	4.289	2.44	1.566	..	..	3.939	..	2.07	..	3.997	..	..	..
Unemployment, female (% of female labor force) (national estimate)	SL.UEM.TOTL.FE.NE.ZS	Ukraine	UKR	6.83	6.603	5.997	6.088	7.31	6.82	..	..	6.22	7.52	8.08	7.69	7.7	7.434	7.855	9.071	10.148	..	..	..
Unemployment, female (% of female labor force) (national estimate)	SL.UEM.TOTL.FE.NE.ZS	United Arab Emirates	ARE	7.06	..	..	..	..	..	..	..	..	..	..	4.02	7.135	5.95	5.348	5.715	6.186	7.066	4.266	5.51
Unemployment, female (% of female labor force) (national estimate)	SL.UEM.TOTL.FE.NE.ZS	United Kingdom	GBR	4.405	5.051	5.092	5.193	6.533	7.028	7.473	7.67	7.161	6.061	5.376	4.756	4.363	4.064	3.46	4.206	4.626	3.611	3.685	4.138
Unemployment, female (% of female labor force) (national estimate)	SL.UEM.TOTL.FE.NE.ZS	United States	USA	5.096	4.627	4.502	5.422	8.069	8.621	8.463	7.893	7.076	6.06	5.178	4.789	4.309	3.838	3.61	8.345	5.215	3.614	3.454	3.917
Unemployment, female (% of female labor force) (national estimate)	SL.UEM.TOTL.FE.NE.ZS	Uruguay	URY	15.114	14.112	12.623	10.816	10.367	9.396	8.069	8.257	8.202	8.344	8.846	9.444	9.472	10.072	10.64	12.441	10.96	9.05	9.462	9.416
Unemployment, female (% of female labor force) (national estimate)	SL.UEM.TOTL.FE.NE.ZS	Uzbekistan	UZB	..	..	..	..	5.85	6.26	4.83	4.72	4.68	4.9	4.96	4.97	5.6	..	12.83	7.673	..	..	..	..
Unemployment, female (% of female labor force) (national estimate)	SL.UEM.TOTL.FE.NE.ZS	Vanuatu	VUT	..	10.371	..	..	5.152	1.573	..	..	..	..	..	..	..	..	6.835	4.124	..	..	..	..
Unemployment, female (% of female labor force) (national estimate)	SL.UEM.TOTL.FE.NE.ZS	Venezuela, RB	VEN	11.649	9.386	7.646	6.218	5.964	6.951	7.208	7.113	8.6	..	..	5.414	5.838	..	..	7.9	..	..	..	..
Unemployment, female (% of female labor force) (national estimate)	SL.UEM.TOTL.FE.NE.ZS	Viet Nam	VNM	..	..	1.935	..	1.575	1.077	0.904	0.933	1.139	1.107	1.705	1.697	1.701	1.027	1.597	2.454	2.285	1.456	1.509	..
Unemployment, female (% of female labor force) (national estimate)	SL.UEM.TOTL.FE.NE.ZS	Virgin Islands (U.S.)	VIR	..	..	..	..	..	..	..	..	..	..	..	..	..	..	..	..	..	..	..	..
Unemployment, female (% of female labor force) (national estimate)	SL.UEM.TOTL.FE.NE.ZS	West Bank and Gaza	PSE	16.67	12.992	14.428	19.532	20.112	21.563	22.445	26.031	27.426	26.159	34.317	37.967	42.828	41.898	41.191	40.07	42.851	40.351	..	30.112
Unemployment, female (% of female labor force) (national estimate)	SL.UEM.TOTL.FE.NE.ZS	Yemen, Rep.	YEM	46.31	42.19	41.54	40.88	40.23	54.71	..	..	..	26.133	..	..	..	..	..	..	..	..	..	..
Unemployment, female (% of female labor force) (national estimate)	SL.UEM.TOTL.FE.NE.ZS	Zambia	ZMB	..	..	..	7.71	..	..	..	..	..	..	18.767	..	4.771	5.085	5.224	6.542	5.7	6.292	6.037	..
Unemployment, female (% of female labor force) (national estimate)	SL.UEM.TOTL.FE.NE.ZS	Zimbabwe	ZWE	..	..	..	..	..	..	5.994	..	..	5.176	..	..	..	..	6.993	..	9.797	10.461	9.46	..
Unemployment, female (% of female labor force) (national estimate)	SL.UEM.TOTL.FE.NE.ZS	Africa Eastern and Southern	AFE	..	..	..	..	..	..	..	..	..	..	..	..	..	..	..	..	..	..	..	..
Unemployment, female (% of female labor force) (national estimate)	SL.UEM.TOTL.FE.NE.ZS	Africa Western and Central	AFW	..	..	..	..	..	..	..	..	..	5.11432	..	..	7.8477	..	9.22417	..	..	4.3252	..	..
Unemployment, female (% of female labor force) (national estimate)	SL.UEM.TOTL.FE.NE.ZS	Arab World	ARB	..	..	16.66	18.2798	19.4294	19.6347	..	19.2762	..	19.4675	..	18.9548	..	..	..	..	..	..	..	..
Unemployment, female (% of female labor force) (national estimate)	SL.UEM.TOTL.FE.NE.ZS	Caribbean small states	CSS	..	..	..	..	..	..	..	..	9.40656	8.37056	7.40103	7.7332	..	..	8.90687	..	..	..	..	..
Unemployment, female (% of female labor force) (national estimate)	SL.UEM.TOTL.FE.NE.ZS	Central Europe and the Baltics	CEB	12.7147	10.6328	8.20056	6.97395	8.49558	9.82449	9.8868	10.1492	10.255	9.13897	7.8966	6.42103	5.23639	4.2747	3.83317	4.39487	4.44333	3.93745	4.00431	4.04489
Unemployment, female (% of female labor force) (national estimate)	SL.UEM.TOTL.FE.NE.ZS	Early-demographic dividend	EAR	7.61785	..	..	..	..	6.36818	..	6.2896	..	..	..	..	..	7.66402	7.043	7.96421	7.05079	6.28371	5.68006	..
Unemployment, female (% of female labor force) (national estimate)	SL.UEM.TOTL.FE.NE.ZS	East Asia & Pacific	EAS	..	..	..	..	..	..	..	..	..	..	..	..	..	..	..	..	..	..	..	..
Unemployment, female (% of female labor force) (national estimate)	SL.UEM.TOTL.FE.NE.ZS	East Asia & Pacific (excluding high income)	EAP	..	..	..	..	..	..	..	..	..	..	..	..	..	..	..	..	..	..	..	..
Unemployment, female (% of female labor force) (national estimate)	SL.UEM.TOTL.FE.NE.ZS	East Asia & Pacific (IDA & IBRD countries)	TEA	..	..	..	..	..	..	..	..	..	..	..	..	..	..	..	..	..	..	..	..
Unemployment, female (% of female labor force) (national estimate)	SL.UEM.TOTL.FE.NE.ZS	Euro area	EMU	10.2982	9.60814	8.58115	8.39318	9.85866	10.3938	10.5215	11.6096	12.0987	11.821	11.0752	10.3805	9.45096	8.53768	7.87229	8.17886	8.11991	7.20789	6.93889	6.63314
Unemployment, female (% of female labor force) (national estimate)	SL.UEM.TOTL.FE.NE.ZS	Europe & Central Asia	ECS	9.03462	8.58356	7.54314	7.47465	8.82286	9.01528	8.90339	9.15248	9.19459	8.9495	8.61269	8.19231	7.56949	7.07168	6.92736	7.18856	7.15162	6.13096	5.83577	5.57248
Unemployment, female (% of female labor force) (national estimate)	SL.UEM.TOTL.FE.NE.ZS	Europe & Central Asia (excluding high income)	ECA	9.18065	9.5399	8.82199	9.07152	9.66313	9.74341	9.58779	9.35152	8.55287	9.1907	9.48083	9.69441	9.18048	9.89932	10.9613	9.59639	10.7608	..	..	..
Unemployment, female (% of female labor force) (national estimate)	SL.UEM.TOTL.FE.NE.ZS	Europe & Central Asia (IDA & IBRD countries)	TEC	9.09348	8.64846	7.35693	7.38847	8.63607	8.43014	7.95233	7.48533	7.45622	7.37311	7.47621	7.35505	6.94612	6.69091	7.0888	7.15996	7.00309	5.84418	5.28451	..
Unemployment, female (% of female labor force) (national estimate)	SL.UEM.TOTL.FE.NE.ZS	European Union	EUU	10.6644	9.69963	8.38088	7.96391	9.38403	10.0327	10.1711	11.06	11.4805	11.0249	10.1756	9.36449	8.43199	7.55114	7.00082	7.35819	7.35003	6.5158	6.33969	6.15202
Unemployment, female (% of female labor force) (national estimate)	SL.UEM.TOTL.FE.NE.ZS	Fragile and conflict affected situations	FCS	..	..	..	..	..	..	..	..	..	..	..	..	..	..	..	..	..	..	..	..
Unemployment, female (% of female labor force) (national estimate)	SL.UEM.TOTL.FE.NE.ZS	Heavily indebted poor countries (HIPC)	HPC	..	..	..	..	..	..	..	..	..	..	..	..	..	..	..	..	..	..	..	..
Unemployment, female (% of female labor force) (national estimate)	SL.UEM.TOTL.FE.NE.ZS	High income	HIC	7.17084	6.66033	5.98382	6.11523	7.77434	7.95497	7.77128	7.83504	7.7023	7.18641	6.70511	6.28985	5.77485	5.2919	4.95235	6.78723	5.78986	4.77086	4.51707	4.55969
Unemployment, female (% of female labor force) (national estimate)	SL.UEM.TOTL.FE.NE.ZS	IBRD only	IBD	..	..	..	..	..	..	..	6.46294	..	..	..	..	..	..	..	7.94833	7.70931	6.4287	..	..
Unemployment, female (% of female labor force) (national estimate)	SL.UEM.TOTL.FE.NE.ZS	IDA & IBRD total	IBT	..	..	..	..	..	..	..	..	..	..	..	..	..	..	..	..	..	..	..	..
Unemployment, female (% of female labor force) (national estimate)	SL.UEM.TOTL.FE.NE.ZS	IDA blend	IDB	..	..	..	..	..	..	3.16204	..	3.63543	4.50509	5.36579	5.83393	..	..	9.75646	..	..	..	..	..
Unemployment, female (% of female labor force) (national estimate)	SL.UEM.TOTL.FE.NE.ZS	IDA only	IDX	..	..	..	..	..	..	..	..	..	..	..	..	..	..	..	..	..	..	..	..
Unemployment, female (% of female labor force) (national estimate)	SL.UEM.TOTL.FE.NE.ZS	IDA total	IDA	..	..	..	..	..	..	..	..	..	..	..	..	..	..	..	..	..	..	..	..
Unemployment, female (% of female labor force) (national estimate)	SL.UEM.TOTL.FE.NE.ZS	Late-demographic dividend	LTE	..	..	..	..	..	..	..	..	..	..	..	..	..	..	..	..	..	..	..	..
Unemployment, female (% of female labor force) (national estimate)	SL.UEM.TOTL.FE.NE.ZS	Latin America & Caribbean	LCN	10.6367	9.25727	9.28341	8.56451	9.59136	..	8.27402	7.81804	7.53572	7.14628	7.84049	8.9832	9.43051	9.47136	9.7669	12.2337	11.4134	8.51138	7.37524	6.5894
Unemployment, female (% of female labor force) (national estimate)	SL.UEM.TOTL.FE.NE.ZS	Latin America & Caribbean (excluding high income)	LAC	10.4892	9.10931	9.32073	8.58628	9.64779	..	8.27889	7.80976	7.48019	7.11077	7.84524	9.25825	9.67503	9.49549	9.79986	12.2467	11.4139	8.43149	7.25999	6.40747
Unemployment, female (% of female labor force) (national estimate)	SL.UEM.TOTL.FE.NE.ZS	Latin America & the Caribbean (IDA & IBRD countries)	TLA	10.7999	9.39507	9.43362	8.68451	9.71923	..	8.33477	7.8697	7.60087	7.21671	7.93329	9.10738	9.56628	9.60785	9.76698	12.2186	11.4134	8.51138	7.37446	6.5894
Unemployment, female (% of female labor force) (national estimate)	SL.UEM.TOTL.FE.NE.ZS	Least developed countries: UN classification	LDC	..	..	..	..	..	..	..	..	..	..	..	..	..	..	..	..	..	..	..	..
Unemployment, female (% of female labor force) (national estimate)	SL.UEM.TOTL.FE.NE.ZS	Low & middle income	LMY	..	..	..	..	..	..	..	..	..	..	..	..	..	..	..	..	..	..	..	..
Unemployment, female (% of female labor force) (national estimate)	SL.UEM.TOTL.FE.NE.ZS	Low income	LIC	..	..	..	..	..	..	..	..	..	..	..	..	..	..	..	..	..	..	..	..
Unemployment, female (% of female labor force) (national estimate)	SL.UEM.TOTL.FE.NE.ZS	Lower middle income	LMC	6.14149	..	..	..	..	4.21653	..	4.47675	..	..	..	..	..	6.43574	6.84122	6.42038	6.01783	5.1298	4.04359	..
Unemployment, female (% of female labor force) (national estimate)	SL.UEM.TOTL.FE.NE.ZS	Middle East, North Africa, Afghanistan & Pakistan	MEA	16.4722	12.2489	10.8267	10.4701	11.6738	12.2298	10.62	12.6373	12.4366	12.1868	13.4976	12.7135	..	12.0311	12.2925	14.8827	12.422	..	..	..
Unemployment, female (% of female labor force) (national estimate)	SL.UEM.TOTL.FE.NE.ZS	Middle East, North Africa, Afghanistan & Pakistan (excluding high income)	MNA	17.3184	12.4618	10.9885	10.7142	11.895	12.5665	10.9515	12.7176	12.4985	12.3096	13.8247	13.1943	..	..	12.7693	15.7012	12.9247	..	..	..
Unemployment, female (% of female labor force) (national estimate)	SL.UEM.TOTL.FE.NE.ZS	Middle East, North Africa, Afghanistan & Pakistan (IDA & IBRD)	TMN	17.3216	12.4592	10.9707	10.6669	11.8538	12.5227	10.8792	12.6441	12.4081	12.2299	13.6847	13.0364	..	..	12.5162	15.4958	12.6913	..	..	..
Unemployment, female (% of female labor force) (national estimate)	SL.UEM.TOTL.FE.NE.ZS	Middle income	MIC	..	..	..	..	..	..	..	..	..	..	..	..	..	..	..	..	..	..	..	..
Unemployment, female (% of female labor force) (national estimate)	SL.UEM.TOTL.FE.NE.ZS	North America	NAC	5.24156	4.79519	4.64108	5.4596	7.97051	8.48177	8.32019	7.78773	7.03173	6.10991	5.30491	4.95607	4.49131	4.02902	3.79815	8.47823	5.46083	3.79205	3.667	4.16824
Unemployment, female (% of female labor force) (national estimate)	SL.UEM.TOTL.FE.NE.ZS	Not classified	INX	..	..	..	..	..	..	..	..	..	..	..	..	..	..	..	..	..	..	..	..
Unemployment, female (% of female labor force) (national estimate)	SL.UEM.TOTL.FE.NE.ZS	OECD members	OED	7.28802	6.54571	6.20214	6.37328	8.05302	8.34897	8.21004	8.30349	8.14743	7.61663	7.05216	6.64622	6.17968	5.71221	5.55727	7.3778	6.41868	5.22896	4.99864	5.08979
Unemployment, female (% of female labor force) (national estimate)	SL.UEM.TOTL.FE.NE.ZS	Other small states	OSS	..	..	..	..	..	..	..	..	..	..	..	10.6462	..	..	..	..	9.21473	..	..	..
Unemployment, female (% of female labor force) (national estimate)	SL.UEM.TOTL.FE.NE.ZS	Pacific island small states	PSS	..	..	..	..	..	..	..	..	..	..	..	..	..	..	..	..	..	..	..	..
Unemployment, female (% of female labor force) (national estimate)	SL.UEM.TOTL.FE.NE.ZS	Post-demographic dividend	PST	6.55884	6.24819	5.77123	5.95731	7.5986	7.98966	7.91124	8.07063	7.82988	7.37807	6.82032	6.39779	5.87231	5.33449	5.01625	6.90517	5.90835	4.66438	4.51917	4.66143
Unemployment, female (% of female labor force) (national estimate)	SL.UEM.TOTL.FE.NE.ZS	Pre-demographic dividend	PRE	..	..	..	..	..	..	..	..	..	..	..	..	..	..	..	..	..	..	..	..
Unemployment, female (% of female labor force) (national estimate)	SL.UEM.TOTL.FE.NE.ZS	Small states	SST	..	..	..	..	..	..	..	..	..	..	..	..	..	..	..	..	..	..	..	..
Unemployment, female (% of female labor force) (national estimate)	SL.UEM.TOTL.FE.NE.ZS	South Asia	SAS	4.42711	..	..	..	..	3.93421	..	3.78982	..	..	..	..	..	7.69314	6.09376	6.79162	5.44574	4.66181	3.94309	4.09104
Unemployment, female (% of female labor force) (national estimate)	SL.UEM.TOTL.FE.NE.ZS	South Asia (IDA & IBRD)	TSA	4.42711	..	..	..	..	3.93421	..	3.78982	..	..	..	..	..	7.69314	6.09376	6.79162	5.44574	4.66181	3.94309	4.09104
Unemployment, female (% of female labor force) (national estimate)	SL.UEM.TOTL.FE.NE.ZS	Sub-Saharan Africa	SSF	..	..	..	..	..	..	..	..	..	..	..	..	..	..	..	..	..	..	..	..
Unemployment, female (% of female labor force) (national estimate)	SL.UEM.TOTL.FE.NE.ZS	Sub-Saharan Africa (excluding high income)	SSA	..	..	..	..	..	..	..	..	..	..	..	..	..	..	..	..	..	..	..	..
Unemployment, female (% of female labor force) (national estimate)	SL.UEM.TOTL.FE.NE.ZS	Sub-Saharan Africa (IDA & IBRD countries)	TSS	..	..	..	..	..	..	..	..	..	..	..	..	..	..	..	..	..	..	..	..
Unemployment, female (% of female labor force) (national estimate)	SL.UEM.TOTL.FE.NE.ZS	Upper middle income	UMC	..	..	..	..	..	..	..	..	..	..	..	..	..	..	..	..	..	..	..	..
Unemployment, female (% of female labor force) (national estimate)	SL.UEM.TOTL.FE.NE.ZS	World	WLD	7.64996	..	..	..	..	..	..	..	..	..	..	..	..	..	6.65969	..	..	..	..	..
Unemployment, male (% of male labor force) (national estimate)	SL.UEM.TOTL.MA.NE.ZS	Afghanistan	AFG	..	..	..	2.653	..	..	..	1.36	..	7.196	..	..	10.37	..	..	10.452	5.729	..	..	..
Unemployment, male (% of male labor force) (national estimate)	SL.UEM.TOTL.MA.NE.ZS	Albania	ALB	6.201	11.8	15.678	12.521	12.136	12.732	13.265	14.81	17.756	19.905	17.247	16.141	14.442	12.63	11.585	11.468	11.309	10.398	10.421	..
Unemployment, male (% of male labor force) (national estimate)	SL.UEM.TOTL.MA.NE.ZS	Algeria	DZA	..	..	..	..	8.57	8.11	..	9.56	8.3	8.956	9.923	8.177	9.78	..	..	..	..	..	..	..
Unemployment, male (% of male labor force) (national estimate)	SL.UEM.TOTL.MA.NE.ZS	American Samoa	ASM	..	..	..	..	..	..	..	..	..	..	..	..	..	..	..	..	..	..	..	..
Unemployment, male (% of male labor force) (national estimate)	SL.UEM.TOTL.MA.NE.ZS	Andorra	AND	..	..	..	..	..	..	..	..	..	..	..	..	..	..	..	..	..	..	..	..
Unemployment, male (% of male labor force) (national estimate)	SL.UEM.TOTL.MA.NE.ZS	Angola	AGO	..	..	..	..	4.672	7.91	14.7	..	..	9.963	..	..	..	..	16.417	..	15.793	13.818	..	..
Unemployment, male (% of male labor force) (national estimate)	SL.UEM.TOTL.MA.NE.ZS	Antigua and Barbuda	ATG	..	..	..	..	..	..	..	..	..	..	..	..	..	7.556	..	..	..	..	4.789	..
Unemployment, male (% of male labor force) (national estimate)	SL.UEM.TOTL.MA.NE.ZS	Argentina	ARG	9.998	8.362	..	6.475	7.757	6.647	6.24	6.064	6.105	6.469	..	..	7.513	8.203	9.178	10.749	7.893	6.127	5.628	1.584
Unemployment, male (% of male labor force) (national estimate)	SL.UEM.TOTL.MA.NE.ZS	Armenia	ARM	..	..	10.426	20.472	18.192	17.608	17.606	16.495	14.538	15.68	17.364	17.735	17.911	7.672	8.27	7.505	7.578	7.111	7.217	..
Unemployment, male (% of male labor force) (national estimate)	SL.UEM.TOTL.MA.NE.ZS	Aruba	ABW	..	..	4.97	..	..	10.77	8.6	..	..	..	..	..	..	..	..	..	..	..	..	..
Unemployment, male (% of male labor force) (national estimate)	SL.UEM.TOTL.MA.NE.ZS	Australia	AUS	4.879	4.668	4.04	3.955	5.694	5.075	4.894	5.138	5.707	5.996	6.038	5.652	5.518	5.299	5.183	6.439	5.163	3.779	3.755	4.047
Unemployment, male (% of male labor force) (national estimate)	SL.UEM.TOTL.MA.NE.ZS	Austria	AUT	5.504	5.044	4.55	3.982	5.582	5.06	4.634	4.981	5.403	5.891	6.18	6.477	5.97	5.111	4.68	5.365	6.508	5.164	5.476	5.551
Unemployment, male (% of male labor force) (national estimate)	SL.UEM.TOTL.MA.NE.ZS	Azerbaijan	AZE	7.23	6.88	7.09	6.15	4.94	4.39	4.43	4.32	4.04	4.02	4.09	4.2	4.1	4.1	4.29	6.13	5.15	4.81	..	..
Unemployment, male (% of male labor force) (national estimate)	SL.UEM.TOTL.MA.NE.ZS	Bahamas, The	BHS	9.26	7.03	6.72	7.18	14.45	..	13.71	14.07	16.11	13	11	11.1	8	10.1	9.008	..	..	..	9.056	..
Unemployment, male (% of male labor force) (national estimate)	SL.UEM.TOTL.MA.NE.ZS	Bahrain	BHR	..	..	..	..	..	0.44	..	0.47	..	..	..	..	..	..	..	..	..	..	..	..
Unemployment, male (% of male labor force) (national estimate)	SL.UEM.TOTL.MA.NE.ZS	Bangladesh	BGD	3.35	2.664	..	..	4.2	2.954	2.141	..	3.149	..	..	3.09	3.315	..	..	..	..	4.429	3.413	..
Unemployment, male (% of male labor force) (national estimate)	SL.UEM.TOTL.MA.NE.ZS	Barbados	BRB	..	..	..	..	10.15	10.9	..	..	11.66	11.81	10.628	7.851	8.466	8.118	9.528	..	10.488	6.968	6.196	..
Unemployment, male (% of male labor force) (national estimate)	SL.UEM.TOTL.MA.NE.ZS	Belarus	BLR	1	0.8	0.7	0.7	7.5	..	0.6	0.6	0.6	0.7	1.2	7.48	7.229	5.926	5.109	4.775	4.734	4.242	4.137	..
Unemployment, male (% of male labor force) (national estimate)	SL.UEM.TOTL.MA.NE.ZS	Belgium	BEL	7.597	7.396	6.663	6.468	7.745	8.107	7.106	7.652	8.64	9.02	9.094	8.06	7.123	6.271	5.735	5.714	6.609	5.848	5.979	6.101
Unemployment, male (% of male labor force) (national estimate)	SL.UEM.TOTL.MA.NE.ZS	Belize	BLZ	7.34	6.21	5.85	..	..	..	..	..	5.822	4.752	5.436	4.403	4.593	5.646	5.87	..	..	..	..	..
Unemployment, male (% of male labor force) (national estimate)	SL.UEM.TOTL.MA.NE.ZS	Benin	BEN	..	..	..	..	..	0.93	2.418	..	2.437	..	..	..	..	..	1.086	..	..	1.894	..	..
Unemployment, male (% of male labor force) (national estimate)	SL.UEM.TOTL.MA.NE.ZS	Bermuda	BMU	..	..	..	..	5.96	7.01	..	8.7	7.72	9.8	..	..	..	..	..	..	..	..	..	..
Unemployment, male (% of male labor force) (national estimate)	SL.UEM.TOTL.MA.NE.ZS	Bhutan	BTN	2.9	2.63	..	..	2.64	2.7	1.85	1.9	2.2	1.91	1.84	..	..	2.679	2.237	4.13	3.618	4.383	2.356	2.721
Unemployment, male (% of male labor force) (national estimate)	SL.UEM.TOTL.MA.NE.ZS	Bolivia	BOL	4.54	4.54	4.53	1.976	2.455	..	1.918	1.489	1.983	1.363	2.62	3.092	3.343	3.442	3.427	6.415	4.486	2.938	2.613	2.322
Unemployment, male (% of male labor force) (national estimate)	SL.UEM.TOTL.MA.NE.ZS	Bosnia and Herzegovina	BIH	..	28.917	26.715	21.4	23.108	25.681	26.114	26.366	26.548	25.181	25.782	22.53	18.868	17.206	13.649	14.119	12.665	10.702	9.13	..
Unemployment, male (% of male labor force) (national estimate)	SL.UEM.TOTL.MA.NE.ZS	Botswana	BWA	..	15.637	..	..	13.003	14.59	18.003	..	..	..	..	..	..	..	18.348	19.501	20.195	21.378	20.009	22.488
Unemployment, male (% of male labor force) (national estimate)	SL.UEM.TOTL.MA.NE.ZS	Brazil	BRA	7.945	7.339	6.835	6.008	6.918	..	5.446	5.795	5.674	5.603	7.218	10.061	11.191	10.72	10.051	11.784	10.656	7.463	6.597	5.588
Unemployment, male (% of male labor force) (national estimate)	SL.UEM.TOTL.MA.NE.ZS	British Virgin Islands	VGB	..	..	..	..	..	..	..	..	..	..	..	..	..	..	..	..	..	..	..	..
Unemployment, male (% of male labor force) (national estimate)	SL.UEM.TOTL.MA.NE.ZS	Brunei Darussalam	BRN	..	..	..	..	..	..	..	..	..	6.121	..	..	8.795	7.716	5.746	6.435	3.868	4.699	5.281	..
Unemployment, male (% of male labor force) (national estimate)	SL.UEM.TOTL.MA.NE.ZS	Bulgaria	BGR	10.297	8.644	6.516	5.479	6.986	10.859	12.263	13.522	13.902	12.312	9.777	8.1	6.354	5.692	4.455	5.351	5.381	4.34	4.41	4.392
Unemployment, male (% of male labor force) (national estimate)	SL.UEM.TOTL.MA.NE.ZS	Burkina Faso	BFA	..	2.918	2.8	..	..	..	..	..	..	3.857	..	..	..	4.746	1.49	..	..	1.911	4.981	2.547
Unemployment, male (% of male labor force) (national estimate)	SL.UEM.TOTL.MA.NE.ZS	Burundi	BDI	..	4.072	..	2.16	..	..	..	..	..	2.055	..	..	..	..	..	1.091	..	..	..	..
Unemployment, male (% of male labor force) (national estimate)	SL.UEM.TOTL.MA.NE.ZS	Cabo Verde	CPV	..	..	..	..	13.349	..	..	..	..	..	31.002	..	11.82	12.66	10.66	..	..	..	..	..
Unemployment, male (% of male labor force) (national estimate)	SL.UEM.TOTL.MA.NE.ZS	Cambodia	KHM	..	..	1.32	0.79	0.6	0.747	0.679	1.409	0.362	0.689	0.334	0.59	0.109	..	0.481	0.136	0.378	..	0.301	..
Unemployment, male (% of male labor force) (national estimate)	SL.UEM.TOTL.MA.NE.ZS	Cameroon	CMR	21.287	..	2.635	..	..	3.4	..	..	..	3.063	..	..	..	..	..	..	2.479	..	..	..
Unemployment, male (% of male labor force) (national estimate)	SL.UEM.TOTL.MA.NE.ZS	Canada	CAN	7.015	6.731	6.48	6.739	9.616	8.915	8.051	7.787	7.556	7.487	7.513	7.718	6.872	6.113	6.072	9.778	7.695	5.408	5.556	6.656
Unemployment, male (% of male labor force) (national estimate)	SL.UEM.TOTL.MA.NE.ZS	Cayman Islands	CYM	..	2.45	3.49	3.84	7.04	..	8.07	7.1	6.7	4.75	3.3	..	..	..	..	..	..	..	..	..
Unemployment, male (% of male labor force) (national estimate)	SL.UEM.TOTL.MA.NE.ZS	Central African Republic	CAF	..	..	..	..	..	..	..	..	..	..	..	..	..	..	..	..	..	..	..	..
Unemployment, male (% of male labor force) (national estimate)	SL.UEM.TOTL.MA.NE.ZS	Chad	TCD	..	..	..	..	..	..	..	..	..	..	..	..	..	1.423	..	..	..	..	..	..
Unemployment, male (% of male labor force) (national estimate)	SL.UEM.TOTL.MA.NE.ZS	Channel Islands	CHI	..	..	..	..	..	..	..	..	..	..	..	..	..	..	..	..	..	..	..	..
Unemployment, male (% of male labor force) (national estimate)	SL.UEM.TOTL.MA.NE.ZS	Chile	CHL	7.638	7.421	6.952	7.506	9.968	7.503	6.435	5.749	5.673	6.38	6.107	6.544	6.864	7.005	7.021	11.018	9.214	7.905	8.826	8.155
Unemployment, male (% of male labor force) (national estimate)	SL.UEM.TOTL.MA.NE.ZS	China	CHN	..	..	..	..	..	..	..	..	..	..	..	..	..	..	..	..	..	..	..	..
Unemployment, male (% of male labor force) (national estimate)	SL.UEM.TOTL.MA.NE.ZS	Colombia	COL	8.742	..	8.305	8.532	9.047	8.823	8.087	7.781	7.271	6.964	6.693	7.044	7.123	7.418	8.215	12.799	10.899	8.617	7.939	7.96
Unemployment, male (% of male labor force) (national estimate)	SL.UEM.TOTL.MA.NE.ZS	Comoros	COM	..	..	..	..	..	..	..	..	..	6.68	..	..	..	..	..	..	3.913	..	..	..
Unemployment, male (% of male labor force) (national estimate)	SL.UEM.TOTL.MA.NE.ZS	Congo, Dem. Rep.	COD	3.639	..	..	..	..	..	..	5.322	..	..	..	..	..	..	..	1.831	..	..	..	..
Unemployment, male (% of male labor force) (national estimate)	SL.UEM.TOTL.MA.NE.ZS	Congo, Rep.	COG	18.481	..	..	..	23.163	..	..	9.4	..	..	..	..	..	..	..	..	..	..	..	..
Unemployment, male (% of male labor force) (national estimate)	SL.UEM.TOTL.MA.NE.ZS	Costa Rica	CRI	5	4.326	3.199	4.132	6.561	5.964	8.046	7.969	7.2	7.169	7.132	6.787	6.487	7.457	8.52	13.222	11.738	8.655	7.121	6.372
Unemployment, male (% of male labor force) (national estimate)	SL.UEM.TOTL.MA.NE.ZS	Cote d'Ivoire	CIV	..	..	..	..	..	..	..	7.13	3.548	..	..	1.556	2.865	..	1.945	..	..	2.097	..	..
Unemployment, male (% of male labor force) (national estimate)	SL.UEM.TOTL.MA.NE.ZS	Croatia	HRV	11.563	9.813	8.75	7.039	7.917	11.038	13.644	16.121	17.678	16.312	15.44	12.395	10.468	7.453	6.11	7.296	7.079	5.873	5.647	5.034
Unemployment, male (% of male labor force) (national estimate)	SL.UEM.TOTL.MA.NE.ZS	Cuba	CUB	1.8	1.731	1.737	1.348	1.47	2.37	2.97	3.448	3.13	2.4	2.3	1.9	1.7	1.6	..	..	..	..	..	..
Unemployment, male (% of male labor force) (national estimate)	SL.UEM.TOTL.MA.NE.ZS	Curacao	CUW	..	..	..	..	..	..	..	..	..	..	..	..	..	11.3	..	17.62	..	..	..	..
Unemployment, male (% of male labor force) (national estimate)	SL.UEM.TOTL.MA.NE.ZS	Cyprus	CYP	4.494	3.904	3.408	3.213	5.493	6.229	8.118	12.781	16.799	17.219	15.152	12.656	10.972	8.158	6.321	7.702	7.076	5.958	5.79	4.605
Unemployment, male (% of male labor force) (national estimate)	SL.UEM.TOTL.MA.NE.ZS	Czechia	CZE	6.455	5.808	4.218	3.461	5.848	6.382	5.799	6.025	5.904	5.098	4.232	3.378	2.34	1.793	1.724	2.23	2.308	1.789	2.209	2.245
Unemployment, male (% of male labor force) (national estimate)	SL.UEM.TOTL.MA.NE.ZS	Denmark	DNK	4.436	3.332	3.449	3.338	7.068	8.622	7.902	7.804	7.122	6.732	6.057	5.639	5.636	4.94	4.795	5.339	5.004	4.38	4.931	5.854
Unemployment, male (% of male labor force) (national estimate)	SL.UEM.TOTL.MA.NE.ZS	Djibouti	DJI	..	..	..	..	..	..	..	..	..	..	..	..	22.073	..	..	..	..	..	..	..
Unemployment, male (% of male labor force) (national estimate)	SL.UEM.TOTL.MA.NE.ZS	Dominica	DMA	..	..	..	..	..	..	..	..	..	..	..	..	..	..	..	..	..	..	..	..
Unemployment, male (% of male labor force) (national estimate)	SL.UEM.TOTL.MA.NE.ZS	Dominican Republic	DOM	4.873	3.837	3.813	3.224	4.119	4.122	4.687	5.148	5.344	4.83	5.446	4.99	4.294	3.674	4.076	4.158	4.346	3.3	3.468	3.193
Unemployment, male (% of male labor force) (national estimate)	SL.UEM.TOTL.MA.NE.ZS	Ecuador	ECU	3.178	3.016	2.635	3.199	3.771	3.52	2.926	2.852	2.705	3.057	3.005	3.703	3.049	2.915	3.252	5.269	3.644	3.225	2.9	2.815
Unemployment, male (% of male labor force) (national estimate)	SL.UEM.TOTL.MA.NE.ZS	Egypt, Arab Rep.	EGY	7.11	6.68	5.82	5.531	5.04	4.77	8.77	9.235	9.796	9.73	9.392	8.88	8.246	6.801	4.826	5.981	5.627	5.051	4.617	..
Unemployment, male (% of male labor force) (national estimate)	SL.UEM.TOTL.MA.NE.ZS	El Salvador	SLV	8.87	8.45	8.3	7.46	9.03	5.419	4.92	4.228	3.959	4.89	4.37	4.828	4.654	4.187	4.018	4.715	4.017	2.783	2.714	..
Unemployment, male (% of male labor force) (national estimate)	SL.UEM.TOTL.MA.NE.ZS	Equatorial Guinea	GNQ	..	..	..	..	..	..	..	..	..	..	..	..	..	..	..	..	..	..	..	..
Unemployment, male (% of male labor force) (national estimate)	SL.UEM.TOTL.MA.NE.ZS	Eritrea	ERI	..	..	..	..	..	..	..	..	..	..	..	..	..	..	..	..	..	..	..	..
Unemployment, male (% of male labor force) (national estimate)	SL.UEM.TOTL.MA.NE.ZS	Estonia	EST	9.153	6.234	5.383	5.758	16.677	19.274	13.059	10.911	9.089	7.859	6.496	7.566	6.344	5.561	4.123	7.13	6.785	6.066	6.121	7.513
Unemployment, male (% of male labor force) (national estimate)	SL.UEM.TOTL.MA.NE.ZS	Eswatini	SWZ	..	..	..	..	..	..	..	..	..	..	..	21.031	..	..	..	..	32.788	..	32.232	..
Unemployment, male (% of male labor force) (national estimate)	SL.UEM.TOTL.MA.NE.ZS	Ethiopia	ETH	1.812	..	..	..	..	..	..	..	1.651	..	..	..	..	..	..	..	2.933	..	..	..
Unemployment, male (% of male labor force) (national estimate)	SL.UEM.TOTL.MA.NE.ZS	Faroe Islands	FRO	..	..	..	..	..	..	..	..	..	..	..	..	..	..	..	..	..	..	..	..
Unemployment, male (% of male labor force) (national estimate)	SL.UEM.TOTL.MA.NE.ZS	Fiji	FJI	3.333	..	6.838	..	..	..	4.292	..	..	4.93	..	3.697	..	..	..	..	..	..	..	4.486
Unemployment, male (% of male labor force) (national estimate)	SL.UEM.TOTL.MA.NE.ZS	Finland	FIN	9.556	8.748	6.538	6.07	8.888	9.094	8.405	8.28	8.823	9.327	9.876	9.037	8.872	7.419	7.176	8.011	8.137	7.048	7.844	9.081
Unemployment, male (% of male labor force) (national estimate)	SL.UEM.TOTL.MA.NE.ZS	France	FRA	8.031	8.081	7.48	6.909	8.907	8.944	8.788	9.725	10.039	10.519	10.794	10.245	9.443	8.982	8.475	8.065	7.968	7.469	7.458	7.529
Unemployment, male (% of male labor force) (national estimate)	SL.UEM.TOTL.MA.NE.ZS	French Polynesia	PYF	..	..	11	..	..	..	..	..	..	..	..	..	..	..	..	..	..	..	..	..
Unemployment, male (% of male labor force) (national estimate)	SL.UEM.TOTL.MA.NE.ZS	Gabon	GAB	12.5	..	..	..	..	14.42	..	..	..	..	..	..	..	..	..	..	..	..	..	..
Unemployment, male (% of male labor force) (national estimate)	SL.UEM.TOTL.MA.NE.ZS	Gambia, The	GMB	..	..	..	..	..	..	..	6.527	..	..	..	..	..	4.906	..	..	..	..	7.18	..
Unemployment, male (% of male labor force) (national estimate)	SL.UEM.TOTL.MA.NE.ZS	Georgia	GEO	14.8	15.23	13.93	18.11	22.098	22.473	21.572	20.773	22.108	19.933	18.71	19.947	15.012	13.924	12.792	13.05	..	..	..	..
Unemployment, male (% of male labor force) (national estimate)	SL.UEM.TOTL.MA.NE.ZS	Germany	DEU	11.398	10.279	8.698	7.329	8.211	7.423	6.191	5.496	5.598	5.282	4.963	4.434	4.181	3.799	3.542	4.223	3.987	3.368	3.258	3.586
Unemployment, male (% of male labor force) (national estimate)	SL.UEM.TOTL.MA.NE.ZS	Ghana	GHA	..	4.619	..	..	..	4.91	..	..	1.969	..	7.045	..	3.253	..	..	..	2.843	2.572	..	..
Unemployment, male (% of male labor force) (national estimate)	SL.UEM.TOTL.MA.NE.ZS	Gibraltar	GIB	..	..	..	..	..	..	..	..	..	..	..	..	..	..	..	..	..	..	..	..
Unemployment, male (% of male labor force) (national estimate)	SL.UEM.TOTL.MA.NE.ZS	Greece	GRC	6.234	5.549	5.176	5.095	6.889	10.012	15.186	21.782	24.642	23.727	21.741	19.859	17.73	15.299	13.702	13.192	11.287	9.276	8.427	7.911
Unemployment, male (% of male labor force) (national estimate)	SL.UEM.TOTL.MA.NE.ZS	Greenland	GRL	10.42	10.01	..	..	..	7.8	9.2	9.6	10.1	10.3	8.9	..	..	..	..	..	..	..	..	..
Unemployment, male (% of male labor force) (national estimate)	SL.UEM.TOTL.MA.NE.ZS	Grenada	GRD	..	..	..	..	..	..	..	..	..	..	..	..	..	12.523	8.609	10.508	11.688	..	4.092	..
Unemployment, male (% of male labor force) (national estimate)	SL.UEM.TOTL.MA.NE.ZS	Guam	GUM	6.4	7.2	7.1	..	8.8	7.3	11.2	11.9	..	..	..	..	..	..	..	..	..	..	..	..
Unemployment, male (% of male labor force) (national estimate)	SL.UEM.TOTL.MA.NE.ZS	Guatemala	GTM	..	1.542	..	..	..	3.305	2.856	2.366	2.67	2.361	1.989	2.115	1.928	2.011	1.819	..	1.791	2.151	1.935	..
Unemployment, male (% of male labor force) (national estimate)	SL.UEM.TOTL.MA.NE.ZS	Guinea	GIN	..	..	..	..	..	..	..	..	..	5.754	..	..	..	..	4.983	..	..	..	..	..
Unemployment, male (% of male labor force) (national estimate)	SL.UEM.TOTL.MA.NE.ZS	Guinea-Bissau	GNB	..	..	..	..	..	..	..	..	..	..	..	..	..	3.435	2.529	..	..	3.45	..	..
Unemployment, male (% of male labor force) (national estimate)	SL.UEM.TOTL.MA.NE.ZS	Guyana	GUY	..	..	..	..	..	..	..	..	..	..	..	..	..	12.005	12.136	..	..	..	..	..
Unemployment, male (% of male labor force) (national estimate)	SL.UEM.TOTL.MA.NE.ZS	Haiti	HTI	..	..	14.9	..	..	..	..	11.5	..	..	..	..	..	..	..	..	..	..	..	..
Unemployment, male (% of male labor force) (national estimate)	SL.UEM.TOTL.MA.NE.ZS	Honduras	HND	4.066	3.128	2.631	2.774	2.74	3.373	3.452	3.009	4.561	5.676	4.414	5.295	4.04	4.62	4.22	8.792	6.919	5.938	4.488	3.953
Unemployment, male (% of male labor force) (national estimate)	SL.UEM.TOTL.MA.NE.ZS	Hong Kong SAR, China	HKG	6.54	5.63	4.53	4.05	6.07	5.056	3.988	3.772	3.803	3.567	3.438	3.692	3.382	3.183	3.538	6.88	6.137	5.114	3.487	3.63
Unemployment, male (% of male labor force) (national estimate)	SL.UEM.TOTL.MA.NE.ZS	Hungary	HUN	6.987	7.141	7.131	7.66	10.275	11.611	11.068	11.341	10.211	7.566	6.622	5.121	3.809	3.449	3.332	4.095	3.862	3.677	4.044	4.535
Unemployment, male (% of male labor force) (national estimate)	SL.UEM.TOTL.MA.NE.ZS	Iceland	ISL	2.596	2.636	2.236	3.248	8.561	8.31	7.768	6.307	5.649	4.999	3.914	2.918	2.763	2.847	3.845	5.635	5.744	4.133	3.866	3.751
Unemployment, male (% of male labor force) (national estimate)	SL.UEM.TOTL.MA.NE.ZS	India	IND	3.717	..	..	..	..	2.88	..	3.048	..	..	..	..	..	7.634	6.652	8.236	6.73	4.908	4.222	4.21
Unemployment, male (% of male labor force) (national estimate)	SL.UEM.TOTL.MA.NE.ZS	Indonesia	IDN	6.782	6.585	6.95	6.657	5.739	5.128	4.899	4.272	4.379	4.15	4.566	4.573	3.975	4.519	3.747	4.569	4.267	3.658	3.453	..
Unemployment, male (% of male labor force) (national estimate)	SL.UEM.TOTL.MA.NE.ZS	Iran, Islamic Rep.	IRN	10.311	10.252	9.484	9.266	10.988	12.097	10.717	10.579	8.746	8.907	9.395	10.681	10.327	10.506	9.099	8.466	7.968	7.728	6.68	..
Unemployment, male (% of male labor force) (national estimate)	SL.UEM.TOTL.MA.NE.ZS	Iraq	IRQ	..	..	8.858	..	..	..	..	7.187	..	8.44	..	8.49	10.26	..	..	..	14.279	..	..	..
Unemployment, male (% of male labor force) (national estimate)	SL.UEM.TOTL.MA.NE.ZS	Ireland	IRL	4.559	4.541	5.02	7.599	15.075	17.068	17.695	17.679	14.829	12.672	10.734	9.023	7.066	5.784	5.174	5.6	6.348	4.311	4.266	4.254
Unemployment, male (% of male labor force) (national estimate)	SL.UEM.TOTL.MA.NE.ZS	Isle of Man	IMN	1.8	2.8	1.7	1.8	..	..	3.77	..	3.358	2.59	..	3.03	..	..	..	..	..	..	..	..
Unemployment, male (% of male labor force) (national estimate)	SL.UEM.TOTL.MA.NE.ZS	Israel	ISR	8.527	7.888	6.776	5.747	7.574	6.762	5.59	6.663	6.104	5.775	5.057	4.596	4.05	3.954	3.626	4.349	4.887	3.801	3.535	3.014
Unemployment, male (% of male labor force) (national estimate)	SL.UEM.TOTL.MA.NE.ZS	Italy	ITA	6.168	5.421	4.878	5.495	6.724	7.498	7.519	9.804	11.477	11.861	11.315	10.89	10.339	9.668	9.026	8.424	8.657	7.111	6.777	5.87
Unemployment, male (% of male labor force) (national estimate)	SL.UEM.TOTL.MA.NE.ZS	Jamaica	JAM	7.637	7.013	6.088	4.931	5.898	5.946	6.276	6.672	7.404	6.978	9.899	6.374	5.477	4.242	3.831	5.729	4.231	3.192	2.24	..
Unemployment, male (% of male labor force) (national estimate)	SL.UEM.TOTL.MA.NE.ZS	Japan	JPN	4.608	4.381	3.974	4.107	5.273	5.463	4.841	4.581	4.301	3.755	3.607	3.358	2.959	2.652	2.497	3.03	3.035	2.828	2.8	2.7
Unemployment, male (% of male labor force) (national estimate)	SL.UEM.TOTL.MA.NE.ZS	Jordan	JOR	12.8	11.9	10.3	10.1	10.3	10.4	11	10.4	10.6	10.1	10.975	13.32	15.769	17.003	15.444	17.94	18.548	16.437	15.137	..
Unemployment, male (% of male labor force) (national estimate)	SL.UEM.TOTL.MA.NE.ZS	Kazakhstan	KAZ	..	..	..	5.33	5.59	4.93	4.6	4.13	4.57	..	..	..	4.4	..	..	4.43	..	4.26	..	..
Unemployment, male (% of male labor force) (national estimate)	SL.UEM.TOTL.MA.NE.ZS	Kenya	KEN	9.809	..	..	..	9.9	..	..	..	..	..	..	2.583	..	..	4.784	..	3.831	4.163	..	..
Unemployment, male (% of male labor force) (national estimate)	SL.UEM.TOTL.MA.NE.ZS	Kiribati	KIR	12.25	..	..	..	..	27.63	..	..	..	..	11.87	..	..	..	8.478	9.899	..	..	2.053	..
Unemployment, male (% of male labor force) (national estimate)	SL.UEM.TOTL.MA.NE.ZS	Korea, Dem. People's Rep.	PRK	..	..	..	..	..	..	..	..	..	..	..	..	..	..	..	..	..	..	..	..
Unemployment, male (% of male labor force) (national estimate)	SL.UEM.TOTL.MA.NE.ZS	Korea, Rep.	KOR	3.755	3.644	3.45	3.356	3.843	3.668	3.241	2.995	3.263	3.17	3.592	3.732	3.778	3.922	3.87	3.886	3.562	2.722	2.638	2.754
Unemployment, male (% of male labor force) (national estimate)	SL.UEM.TOTL.MA.NE.ZS	Kosovo	XKX	32.9	34.6	38.5	42.7	40.7	..	..	28.028	26.683	33.079	31.694	26.177	28.524	26.704	21.925	23.004	18.685	10.547	7.372	..
Unemployment, male (% of male labor force) (national estimate)	SL.UEM.TOTL.MA.NE.ZS	Kuwait	KWT	2	0.8	1	1.1	1.04	1.41	..	..	..	1.9	1.2	0.94	..	..	..	..	..	..	..	..
Unemployment, male (% of male labor force) (national estimate)	SL.UEM.TOTL.MA.NE.ZS	Kyrgyz Republic	KGZ	7.41	7.71	..	7.34	7.41	7.753	6.404	5.127	4.894	4.28	3.627	3.558	3.228	4.278	4.919	5.271	4.562	3.947	3.044	..
Unemployment, male (% of male labor force) (national estimate)	SL.UEM.TOTL.MA.NE.ZS	Lao PDR	LAO	1.35	..	..	..	..	0.755	..	..	..	..	2.048	..	3.743	..	..	..	..	1.498	..	..
Unemployment, male (% of male labor force) (national estimate)	SL.UEM.TOTL.MA.NE.ZS	Latvia	LVA	10.092	7.309	6.511	8.382	20.899	22.747	18.636	16.162	12.6	11.848	11.094	10.895	9.758	8.409	7.199	9.125	8.47	8.111	7.491	7.994
Unemployment, male (% of male labor force) (national estimate)	SL.UEM.TOTL.MA.NE.ZS	Lebanon	LBN	..	..	8.6	..	5.022	..	..	..	..	..	..	..	..	..	9.913	..	..	..	..	..
Unemployment, male (% of male labor force) (national estimate)	SL.UEM.TOTL.MA.NE.ZS	Lesotho	LSO	..	..	..	32.54	..	..	..	..	..	..	..	..	..	..	15.111	..	..	..	..	16.161
Unemployment, male (% of male labor force) (national estimate)	SL.UEM.TOTL.MA.NE.ZS	Liberia	LBR	..	..	..	..	..	2.244	..	..	..	2.358	..	3.792	6.222	..	..	..	..	..	..	..
Unemployment, male (% of male labor force) (national estimate)	SL.UEM.TOTL.MA.NE.ZS	Libya	LBY	..	..	..	..	..	..	..	15.88	..	..	..	..	..	..	..	..	..	..	..	..
Unemployment, male (% of male labor force) (national estimate)	SL.UEM.TOTL.MA.NE.ZS	Liechtenstein	LIE	..	..	1.68	..	..	..	..	..	..	..	..	..	..	..	..	..	..	..	..	..
Unemployment, male (% of male labor force) (national estimate)	SL.UEM.TOTL.MA.NE.ZS	Lithuania	LTU	8.122	5.946	4.173	6.019	17.083	21.192	17.906	15.196	13.065	12.181	10.097	9.102	8.5	6.891	7.023	9.268	7.608	6.44	7.301	7.734
Unemployment, male (% of male labor force) (national estimate)	SL.UEM.TOTL.MA.NE.ZS	Luxembourg	LUX	3.504	3.547	3.552	4.317	4.372	3.836	4.01	4.461	5.647	5.87	6.462	6.431	5.544	5.336	5.649	6.602	5.196	4.455	4.966	6.566
Unemployment, male (% of male labor force) (national estimate)	SL.UEM.TOTL.MA.NE.ZS	Macao SAR, China	MAC	4.4	3.8	3.5	3.2	4.2	3.52	2.98	2.27	2.23	1.93	1.97	2.3	2.397	2.307	2.128	2.921	..	..	..	..
Unemployment, male (% of male labor force) (national estimate)	SL.UEM.TOTL.MA.NE.ZS	Madagascar	MDG	1.75	..	..	..	..	3.25	..	0.571	..	..	1.77	..	..	..	..	..	..	2.943	..	..
Unemployment, male (% of male labor force) (national estimate)	SL.UEM.TOTL.MA.NE.ZS	Malawi	MWI	1.117	..	..	..	..	..	1.71	..	4.093	..	..	..	3.149	..	..	0.761	..	..	..	..
Unemployment, male (% of male labor force) (national estimate)	SL.UEM.TOTL.MA.NE.ZS	Malaysia	MYS	3.44	..	..	..	..	..	2.91	..	..	2.67	2.92	3.13	..	3.09	..	4.45	4.55	3.82	..	..
Unemployment, male (% of male labor force) (national estimate)	SL.UEM.TOTL.MA.NE.ZS	Maldives	MDV	..	..	..	..	10.38	..	..	..	..	3.193	..	6.105	..	..	5.027	..	..	..	..	..
Unemployment, male (% of male labor force) (national estimate)	SL.UEM.TOTL.MA.NE.ZS	Mali	MLI	..	..	10.58	..	1.71	6.04	..	..	4.549	6.442	6.858	1.418	6.654	1.666	3.091	3.517	..	1.895	..	..
Unemployment, male (% of male labor force) (national estimate)	SL.UEM.TOTL.MA.NE.ZS	Malta	MLT	6.27	6.107	5.78	5.571	6.513	6.714	5.982	5.6	6.099	6.135	5.388	4.384	3.843	4.121	3.68	4.659	3.884	3.704	3.672	3.225
Unemployment, male (% of male labor force) (national estimate)	SL.UEM.TOTL.MA.NE.ZS	Marshall Islands	MHL	..	..	..	..	..	..	4.87	..	..	..	..	..	..	..	7.261	..	8.863	..	..	..
Unemployment, male (% of male labor force) (national estimate)	SL.UEM.TOTL.MA.NE.ZS	Mauritania	MRT	..	..	..	..	..	..	..	8.461	..	..	..	..	9.658	..	7.971	..	..	..	..	..
Unemployment, male (% of male labor force) (national estimate)	SL.UEM.TOTL.MA.NE.ZS	Mauritius	MUS	5.769	5.415	5.206	4.044	4.329	4.476	4.911	4.93	4.929	5.355	5.283	4.518	4.641	4.414	4.103	7.563	7.102	4.905	4.233	..
Unemployment, male (% of male labor force) (national estimate)	SL.UEM.TOTL.MA.NE.ZS	Mexico	MEX	3.359	3.378	3.407	3.778	5.358	5.375	5.201	4.899	4.897	4.796	4.222	3.822	3.309	3.191	3.453	4.593	3.89	3.137	2.679	2.601
Unemployment, male (% of male labor force) (national estimate)	SL.UEM.TOTL.MA.NE.ZS	Micronesia, Fed. Sts.	FSM	..	..	..	..	..	..	..	..	..	5.368	..	..	..	..	..	..	..	..	..	..
Unemployment, male (% of male labor force) (national estimate)	SL.UEM.TOTL.MA.NE.ZS	Moldova	MDA	6.826	5.66	3.632	2.484	3.79	3.805	3.244	2.785	2.326	1.846	2.275	2.273	1.937	1.429	1.867	1.483	1.114	1.15	1.964	1.662
Unemployment, male (% of male labor force) (national estimate)	SL.UEM.TOTL.MA.NE.ZS	Monaco	MCO	..	..	..	..	..	..	..	..	..	..	..	4.58	..	..	..	..	..	..	..	..
Unemployment, male (% of male labor force) (national estimate)	SL.UEM.TOTL.MA.NE.ZS	Mongolia	MNG	..	7.244	7.2	5.916	5.58	7.125	5.071	4.25	4.023	5.146	5.395	8.406	6.981	5.851	9.854	6.533	8.26	6.836	5.858	..
Unemployment, male (% of male labor force) (national estimate)	SL.UEM.TOTL.MA.NE.ZS	Montenegro	MNE	26.16	..	18.1	16.25	18.04	18.804	19.5	19.349	20.114	17.897	17.76	18.246	15.385	15.245	14.677	17.475	17.107	16.368	12.283	..
Unemployment, male (% of male labor force) (national estimate)	SL.UEM.TOTL.MA.NE.ZS	Morocco	MAR	10.81	9.67	9.61	9.49	8.84	8.94	8.43	8.65	9.11	9.49	9.11	8.81	..	..	..	..	10.9	10.22	..	..
Unemployment, male (% of male labor force) (national estimate)	SL.UEM.TOTL.MA.NE.ZS	Mozambique	MOZ	..	..	..	..	..	..	..	..	..	..	3.155	..	..	..	..	..	..	6.061	..	..
Unemployment, male (% of male labor force) (national estimate)	SL.UEM.TOTL.MA.NE.ZS	Myanmar	MMR	..	..	..	..	..	..	..	..	..	3.771	0.665	..	1.046	0.625	0.358	1.026	..	..	..	..
Unemployment, male (% of male labor force) (national estimate)	SL.UEM.TOTL.MA.NE.ZS	Namibia	NAM	..	..	..	..	..	20.336	..	14.656	17.334	16.714	..	21.781	..	21.131	..	..	..	..	..	..
Unemployment, male (% of male labor force) (national estimate)	SL.UEM.TOTL.MA.NE.ZS	Nauru	NRU	..	7.6	..	..	..	..	21.36	..	10.025	..	..	..	..	..	..	..	4.92	..	..	..
Unemployment, male (% of male labor force) (national estimate)	SL.UEM.TOTL.MA.NE.ZS	Nepal	NPL	..	..	..	1.696	..	..	..	..	..	..	3.4	..	9.794	..	..	..	..	..	..	..
Unemployment, male (% of male labor force) (national estimate)	SL.UEM.TOTL.MA.NE.ZS	Netherlands	NLD	5.038	4.072	3.289	2.978	3.875	4.519	4.601	5.47	7.188	7.14	6.525	5.579	4.473	3.723	3.4	3.703	3.949	3.268	3.348	3.466
Unemployment, male (% of male labor force) (national estimate)	SL.UEM.TOTL.MA.NE.ZS	New Caledonia	NCL	..	..	..	..	12.05	..	..	..	..	13.74	..	..	10.156	11.612	10.278	14.116	..	10.489	..	..
Unemployment, male (% of male labor force) (national estimate)	SL.UEM.TOTL.MA.NE.ZS	New Zealand	NZL	3.522	3.551	3.36	3.956	5.9	5.963	5.877	6.242	5.305	4.806	4.966	4.806	4.285	4.182	3.821	4.255	3.693	3.082	3.515	4.541
Unemployment, male (% of male labor force) (national estimate)	SL.UEM.TOTL.MA.NE.ZS	Nicaragua	NIC	5.13	5.52	4.8	5.7	..	..	..	4.783	5.14	3.836	4.2	3.6	3.1	5.2	..	..	..	..	..	..
Unemployment, male (% of male labor force) (national estimate)	SL.UEM.TOTL.MA.NE.ZS	Niger	NER	3.4	..	..	..	..	..	0.398	1.674	..	0.602	..	..	7.761	..	0.595	..	..	0.52	..	..
Unemployment, male (% of male labor force) (national estimate)	SL.UEM.TOTL.MA.NE.ZS	Nigeria	NGA	..	..	..	..	..	..	3.845	..	4.026	3.833	3.623	6.135	7.587	..	9.254	..	..	2.427	2.077	2.652
Unemployment, male (% of male labor force) (national estimate)	SL.UEM.TOTL.MA.NE.ZS	North Macedonia	MKD	36.796	35.734	34.751	33.629	32.039	32.856	31.919	31.495	29.005	27.783	27.087	25.003	23.204	21.81	16.662	16.891	16.57	15.838	14.414	13.204
Unemployment, male (% of male labor force) (national estimate)	SL.UEM.TOTL.MA.NE.ZS	Northern Mariana Islands	MNP	7.33	..	..	..	..	9.66	..	..	..	..	..	..	..	..	..	..	..	..	..	..
Unemployment, male (% of male labor force) (national estimate)	SL.UEM.TOTL.MA.NE.ZS	Norway	NOR	4.549	3.445	2.557	2.706	3.547	4.049	3.381	3.57	3.598	3.71	4.56	5.362	4.582	4.034	3.943	4.681	4.573	3.376	3.681	4.139
Unemployment, male (% of male labor force) (national estimate)	SL.UEM.TOTL.MA.NE.ZS	Oman	OMN	..	..	..	3.415	..	..	..	..	..	..	..	1.802	..	0.8	..	1.36	1.1	1.6	..	..
Unemployment, male (% of male labor force) (national estimate)	SL.UEM.TOTL.MA.NE.ZS	Pakistan	PAK	5.96	0.642	0.434	0.396	0.58	0.656	0.831	3.637	2.822	1.773	2.796	2.152	..	3.955	4.408	5.376	5.489	..	..	..
Unemployment, male (% of male labor force) (national estimate)	SL.UEM.TOTL.MA.NE.ZS	Palau	PLW	3.73	..	..	..	..	..	..	..	..	1.056	..	..	..	..	..	0.58	..	..	..	..
Unemployment, male (% of male labor force) (national estimate)	SL.UEM.TOTL.MA.NE.ZS	Panama	PAN	8.11	7.19	5.27	3.486	5.11	4.742	3.578	3.112	3.025	3.63	3.753	4.111	4.43	4.288	5.244	13.587	10.066	7.222	5.296	6.617
Unemployment, male (% of male labor force) (national estimate)	SL.UEM.TOTL.MA.NE.ZS	Papua New Guinea	PNG	..	..	..	..	..	2.683	3.7	..	..	..	..	..	..	..	..	..	..	3.144	..	..
Unemployment, male (% of male labor force) (national estimate)	SL.UEM.TOTL.MA.NE.ZS	Paraguay	PRY	3.876	4.4	3.433	3.42	4.674	3.619	3.494	3.102	3.967	3.819	4.285	4.26	4.996	5.289	5.359	5.853	5.686	5.665	4.662	4.432
Unemployment, male (% of male labor force) (national estimate)	SL.UEM.TOTL.MA.NE.ZS	Peru	PER	4.736	3.614	3.648	3.538	3.772	3.124	3.192	2.84	3.261	3.048	3.212	3.548	3.508	3.17	3.08	7.324	4.719	3.496	4.151	4.435
Unemployment, male (% of male labor force) (national estimate)	SL.UEM.TOTL.MA.NE.ZS	Philippines	PHL	3.541	3.876	3.255	3.54	3.683	3.486	3.439	3.356	3.285	3.518	2.969	2.598	2.46	2.127	2.049	2.396	3.125	2.415	2.265	..
Unemployment, male (% of male labor force) (national estimate)	SL.UEM.TOTL.MA.NE.ZS	Poland	POL	16.383	12.941	8.986	6.427	7.782	9.337	9.028	9.427	9.709	8.518	7.335	6.114	4.872	3.846	3.02	3.057	3.256	2.778	2.704	2.644
Unemployment, male (% of male labor force) (national estimate)	SL.UEM.TOTL.MA.NE.ZS	Portugal	PRT	6.654	6.535	6.597	6.475	8.828	9.757	12.345	15.525	16.041	13.511	12.153	10.996	8.416	6.568	5.803	6.629	6.441	5.724	6.143	6.03
Unemployment, male (% of male labor force) (national estimate)	SL.UEM.TOTL.MA.NE.ZS	Puerto Rico (US)	PRI	12.22	11.21	11.96	12.83	17	18.9	18.2	16.2	..	..	13.8	..	..	..	..	15.037	..	..	..	..
Unemployment, male (% of male labor force) (national estimate)	SL.UEM.TOTL.MA.NE.ZS	Qatar	QAT	..	..	0.22	0.14	0.14	0.14	0.17	0.14	0.09	0.07	0.06	0.06	0.06	0.05	0.05	0.07	0.08	0.08	..	..
Unemployment, male (% of male labor force) (national estimate)	SL.UEM.TOTL.MA.NE.ZS	Romania	ROU	7.784	8.219	7.229	6.681	7.671	7.566	7.742	7.354	7.707	7.347	7.532	6.588	5.602	4.713	4.311	5.29	5.976	6.03	5.934	5.714
Unemployment, male (% of male labor force) (national estimate)	SL.UEM.TOTL.MA.NE.ZS	Russian Federation	RUS	7.311	7.497	6.433	6.571	9.028	7.915	6.99	5.83	5.818	5.532	5.862	5.788	5.395	4.938	4.661	5.664	4.669	3.777	2.969	2.341
Unemployment, male (% of male labor force) (national estimate)	SL.UEM.TOTL.MA.NE.ZS	Rwanda	RWA	..	..	..	..	..	..	..	..	..	1.086	..	..	11.17	10.223	10.499	10.858	14.261	13.688	10.497	9.581
Unemployment, male (% of male labor force) (national estimate)	SL.UEM.TOTL.MA.NE.ZS	Samoa	WSM	..	1.13	..	..	..	..	5.24	7.843	..	7.8	..	..	6.307	..	..	..	..	3.491	..	..
Unemployment, male (% of male labor force) (national estimate)	SL.UEM.TOTL.MA.NE.ZS	San Marino	SMR	1.69	1.24	..	..	2.35	2.13	..	3.36	3.94	4.28	4.42	3.52	4.92	4.81	4.63	4.48	3.49	2.92	..	..
Unemployment, male (% of male labor force) (national estimate)	SL.UEM.TOTL.MA.NE.ZS	Sao Tome and Principe	STP	10.78	11.05	..	..	..	..	..	..	..	..	..	..	8.711	..	..	..	..	..	..	..
Unemployment, male (% of male labor force) (national estimate)	SL.UEM.TOTL.MA.NE.ZS	Saudi Arabia	SAU	4.602	4.706	4.207	3.544	3.529	3.45	..	2.924	2.8	2.864	2.4	2.5	3.224	3.239	2.474	3.887	3.472	2.637	2.082	1.894
Unemployment, male (% of male labor force) (national estimate)	SL.UEM.TOTL.MA.NE.ZS	Senegal	SEN	..	7.94	..	..	..	..	2.697	..	..	..	6.388	4.241	4.412	..	2.752	..	..	3.663	3.986	5.058
Unemployment, male (% of male labor force) (national estimate)	SL.UEM.TOTL.MA.NE.ZS	Serbia	SRB	16.78	17.94	15.79	11.871	14.761	18.422	22.413	23.274	20.867	18.331	16.808	14.592	12.84	11.962	9.846	8.688	9.153	8.069	7.943	7.069
Unemployment, male (% of male labor force) (national estimate)	SL.UEM.TOTL.MA.NE.ZS	Seychelles	SYC	6.1	..	..	..	..	..	3.76	..	..	3.78	3.521	3.711	3.703	3.951	3.188	5.089	..	..	3.45	2.41
Unemployment, male (% of male labor force) (national estimate)	SL.UEM.TOTL.MA.NE.ZS	Sierra Leone	SLE	..	..	..	..	..	..	..	..	..	5.577	..	..	..	4.268	..	..	..	..	..	..
Unemployment, male (% of male labor force) (national estimate)	SL.UEM.TOTL.MA.NE.ZS	Singapore	SGP	..	4.14	3.64	3.61	5.37	3.9	3.58	3.34	3.46	3.46	3.64	3.78	4	..	3	3.9	4.332	3.394	3.226	2.772
Unemployment, male (% of male labor force) (national estimate)	SL.UEM.TOTL.MA.NE.ZS	Sint Maarten (Dutch part)	SXM	..	..	..	..	..	..	..	..	..	..	..	..	..	..	..	..	..	..	..	..
Unemployment, male (% of male labor force) (national estimate)	SL.UEM.TOTL.MA.NE.ZS	Slovak Republic	SVK	15.478	12.298	9.933	8.362	11.38	14.216	13.614	13.516	13.989	10.381	10.337	8.772	7.916	6.138	5.599	6.403	6.678	5.929	5.76	4.8
Unemployment, male (% of male labor force) (national estimate)	SL.UEM.TOTL.MA.NE.ZS	Slovenia	SVN	6.057	4.89	3.964	3.991	5.902	7.419	8.161	8.389	9.422	8.919	8.05	7.488	5.768	4.601	4.011	4.409	4.258	3.752	3.6	3.461
Unemployment, male (% of male labor force) (national estimate)	SL.UEM.TOTL.MA.NE.ZS	Solomon Islands	SLB	..	..	..	..	2.25	..	..	..	0.668	..	..	..	..	..	..	..	..	..	..	..
Unemployment, male (% of male labor force) (national estimate)	SL.UEM.TOTL.MA.NE.ZS	Somalia, Fed. Rep.	SOM	..	..	..	..	..	..	..	..	..	..	..	..	..	..	16.167	..	..	..	..	..
Unemployment, male (% of male labor force) (national estimate)	SL.UEM.TOTL.MA.NE.ZS	South Africa	ZAF	23.559	22.578	21.508	19.69	21.89	22.837	22.558	22.843	22.952	23.145	23.197	24.535	25.2	25.135	26.786	27.743	32.114	31.496	29.989	30.417
Unemployment, male (% of male labor force) (national estimate)	SL.UEM.TOTL.MA.NE.ZS	South Sudan	SSD	..	..	..	11.142	..	..	..	..	..	..	..	..	..	..	..	..	..	..	..	..
Unemployment, male (% of male labor force) (national estimate)	SL.UEM.TOTL.MA.NE.ZS	Spain	ESP	7.132	6.349	6.41	10.055	17.645	19.567	21.044	24.583	25.601	23.598	20.774	18.12	15.657	13.719	12.448	13.868	13.216	11.394	10.665	10.154
Unemployment, male (% of male labor force) (national estimate)	SL.UEM.TOTL.MA.NE.ZS	Sri Lanka	LKA	5.55	4.68	4.32	3.63	4.32	3.416	2.656	2.76	2.959	3.041	2.94	2.84	2.786	2.95	3.259	3.923	3.61	3.632	..	..
Unemployment, male (% of male labor force) (national estimate)	SL.UEM.TOTL.MA.NE.ZS	St. Kitts and Nevis	KNA	..	..	..	..	..	..	..	..	..	..	..	..	..	..	..	..	..	..	..	..
Unemployment, male (% of male labor force) (national estimate)	SL.UEM.TOTL.MA.NE.ZS	St. Lucia	LCA	15	12.4	10	11.04	14.39	..	17.61	17.09	20.66	..	..	..	17.119	17.596	13.837	18.639	17.699	14.177	10.801	9.2
Unemployment, male (% of male labor force) (national estimate)	SL.UEM.TOTL.MA.NE.ZS	St. Martin (French part)	MAF	..	..	..	..	..	..	..	..	..	..	..	..	..	..	..	..	..	..	..	..
Unemployment, male (% of male labor force) (national estimate)	SL.UEM.TOTL.MA.NE.ZS	St. Vincent and the Grenadines	VCT	..	..	..	..	..	..	..	..	..	..	..	..	..	..	..	..	..	..	..	..
Unemployment, male (% of male labor force) (national estimate)	SL.UEM.TOTL.MA.NE.ZS	Sudan	SDN	..	..	..	12.832	9	..	12.371	..	..	..	..	..	..	..	..	..	..	5.971	..	..
Unemployment, male (% of male labor force) (national estimate)	SL.UEM.TOTL.MA.NE.ZS	Suriname	SUR	..	..	..	..	4.84	3.6	4.21	5.08	3.63	3.52	4.38	5.679	..	..	..	..	..	..	..	..
Unemployment, male (% of male labor force) (national estimate)	SL.UEM.TOTL.MA.NE.ZS	Sweden	SWE	7.884	6.895	5.885	5.937	8.657	8.688	7.841	8.214	8.201	8.188	7.56	7.357	6.969	6.482	6.721	8.296	8.511	6.993	7.382	8.157
Unemployment, male (% of male labor force) (national estimate)	SL.UEM.TOTL.MA.NE.ZS	Switzerland	CHE	3.886	3.402	2.915	2.82	3.764	4.479	4.08	4.282	4.6	4.688	4.704	4.841	4.57	4.367	4.114	4.656	4.815	3.894	3.832	4.149
Unemployment, male (% of male labor force) (national estimate)	SL.UEM.TOTL.MA.NE.ZS	Syrian Arab Republic	SYR	..	5.28	5.21	8.35	5.69	6.23	..	..	..	..	..	..	..	..	..	..	..	..	..	..
Unemployment, male (% of male labor force) (national estimate)	SL.UEM.TOTL.MA.NE.ZS	Tajikistan	TJK	..	..	3.717	..	12.26	..	..	..	..	..	..	0.061	..	..	..	..	..	..	..	..
Unemployment, male (% of male labor force) (national estimate)	SL.UEM.TOTL.MA.NE.ZS	Tanzania	TZA	..	2.102	..	0.553	2.2	1.417	2.62	1.037	2.1	1.565	..	..	..	..	..	1.128	..	..	..	..
Unemployment, male (% of male labor force) (national estimate)	SL.UEM.TOTL.MA.NE.ZS	Thailand	THA	1.47	1.3	1.27	1.3	1.52	0.621	0.65	0.62	0.258	0.585	0.589	0.666	0.818	0.784	0.703	1.109	1.186	0.84	0.669	0.743
Unemployment, male (% of male labor force) (national estimate)	SL.UEM.TOTL.MA.NE.ZS	Timor-Leste	TLS	..	..	4.752	..	..	2.851	..	..	4.104	..	4.142	3.343	..	..	..	..	1.897	1.524	..	..
Unemployment, male (% of male labor force) (national estimate)	SL.UEM.TOTL.MA.NE.ZS	Togo	TGO	..	4.297	..	..	..	9.893	2.317	..	..	..	2.705	..	4.735	..	2.275	..	..	1.813	..	..
Unemployment, male (% of male labor force) (national estimate)	SL.UEM.TOTL.MA.NE.ZS	Tonga	TON	..	..	..	..	..	..	..	..	..	..	..	0.927	..	1.612	..	..	1.772	..	1.095	..
Unemployment, male (% of male labor force) (national estimate)	SL.UEM.TOTL.MA.NE.ZS	Trinidad and Tobago	TTO	5.81	4.52	3.91	3.52	4.58	3.587	2.866	3.108	2.281	2.147	2.063	3.238	..	..	3.138	3.749	3.826	3.913	2.974	..
Unemployment, male (% of male labor force) (national estimate)	SL.UEM.TOTL.MA.NE.ZS	Tunisia	TUN	12.059	11.539	11.335	11.15	11.269	10.889	15.041	14.635	13.262	11.632	12.402	12.375	12.387	12.502	13.79	..	..	13.183	12.818	..
Unemployment, male (% of male labor force) (national estimate)	SL.UEM.TOTL.MA.NE.ZS	Turkiye	TUR	10.45	9.922	10.036	10.743	13.919	11.435	9.167	8.537	8.748	9.039	9.245	9.597	9.419	9.549	12.384	12.315	10.671	8.94	7.662	7.108
Unemployment, male (% of male labor force) (national estimate)	SL.UEM.TOTL.MA.NE.ZS	Turkmenistan	TKM	..	..	..	..	4.5	5.3	..	..	..	..	..	..	..	..	..	..	..	..	..	..
Unemployment, male (% of male labor force) (national estimate)	SL.UEM.TOTL.MA.NE.ZS	Turks and Caicos Islands	TCA	..	..	..	..	..	..	..	..	..	..	..	..	..	..	..	..	..	..	..	..
Unemployment, male (% of male labor force) (national estimate)	SL.UEM.TOTL.MA.NE.ZS	Tuvalu	TUV	..	..	..	..	..	5.735	..	..	..	..	..	4.644	25.489	..	..	..	..	6.694	..	..
Unemployment, male (% of male labor force) (national estimate)	SL.UEM.TOTL.MA.NE.ZS	Uganda	UGA	1.7	..	..	..	..	1.286	0.727	2.872	1.37	1.567	..	..	2.923	..	3.049	..	2.861	..	..	..
Unemployment, male (% of male labor force) (national estimate)	SL.UEM.TOTL.MA.NE.ZS	Ukraine	UKR	7.52	7.005	6.681	6.618	10.29	9.3	..	..	8.04	10.85	10.1	10.83	11.1	10.042	8.503	9.843	9.548	..	..	..
Unemployment, male (% of male labor force) (national estimate)	SL.UEM.TOTL.MA.NE.ZS	United Arab Emirates	ARE	2.5	..	..	..	..	..	..	..	..	..	..	1.07	1.325	1.337	1.34	3.836	2.109	1.454	1.497	1.01
Unemployment, male (% of male labor force) (national estimate)	SL.UEM.TOTL.MA.NE.ZS	United Kingdom	GBR	5.29	5.831	5.659	6.218	8.668	8.787	8.818	8.804	8.268	6.694	5.707	5.043	4.623	4.216	3.834	4.8	5.083	3.91	4.338	4.571
Unemployment, male (% of male labor force) (national estimate)	SL.UEM.TOTL.MA.NE.ZS	United States	USA	5.072	4.619	4.726	6.1	10.294	10.521	9.374	8.225	7.638	6.262	5.369	4.94	4.396	3.947	3.722	7.797	5.468	3.681	3.8	4.115
Unemployment, male (% of male labor force) (national estimate)	SL.UEM.TOTL.MA.NE.ZS	Uruguay	URY	9.356	8.153	6.712	5.621	5.507	5.271	4.84	4.906	4.995	5.055	6.358	6.495	6.557	6.862	7.297	8.663	7.914	6.88	7.429	7.201
Unemployment, male (% of male labor force) (national estimate)	SL.UEM.TOTL.MA.NE.ZS	Uzbekistan	UZB	..	..	..	..	4.34	4.59	5.08	5	5.01	5.24	5.31	5.33	6.02	..	6.04	3.943	..	..	..	..
Unemployment, male (% of male labor force) (national estimate)	SL.UEM.TOTL.MA.NE.ZS	Vanuatu	VUT	..	5.864	..	..	4.113	2.075	..	..	..	..	..	..	..	..	4.273	3.983	..	..	..	..
Unemployment, male (% of male labor force) (national estimate)	SL.UEM.TOTL.MA.NE.ZS	Venezuela, RB	VEN	10.046	8.115	7.048	6.262	6.183	7.215	6.704	6.268	6.83	..	..	5.257	4.502	..	..	7.28	..	..	..	..
Unemployment, male (% of male labor force) (national estimate)	SL.UEM.TOTL.MA.NE.ZS	Viet Nam	VNM	..	..	2.115	..	1.89	1.148	1.088	1.115	1.484	1.397	1.983	1.989	2.035	1.283	1.757	1.788	2.474	1.675	1.77	..
Unemployment, male (% of male labor force) (national estimate)	SL.UEM.TOTL.MA.NE.ZS	Virgin Islands (U.S.)	VIR	..	..	..	..	..	..	..	..	..	..	..	..	..	..	..	..	..	..	..	..
Unemployment, male (% of male labor force) (national estimate)	SL.UEM.TOTL.MA.NE.ZS	West Bank and Gaza	PSE	20.655	20.244	19.15	23.667	20.526	21.386	16.504	17.613	18.195	19.196	20.199	20.581	21.534	22.419	21.349	22.476	22.382	20.342	..	31.746
Unemployment, male (% of male labor force) (national estimate)	SL.UEM.TOTL.MA.NE.ZS	Yemen, Rep.	YEM	11.93	12.13	11.83	11.54	11.27	12.43	..	..	..	12.339	..	..	..	..	..	..	..	..	..	..
Unemployment, male (% of male labor force) (national estimate)	SL.UEM.TOTL.MA.NE.ZS	Zambia	ZMB	..	..	..	8.14	..	..	..	..	..	..	6.225	..	4.313	4.984	5.809	5.572	4.767	5.734	5.71	..
Unemployment, male (% of male labor force) (national estimate)	SL.UEM.TOTL.MA.NE.ZS	Zimbabwe	ZWE	..	..	..	..	..	..	4.729	..	..	4.358	..	..	..	..	7.756	..	9.134	9.554	9.126	..
Unemployment, male (% of male labor force) (national estimate)	SL.UEM.TOTL.MA.NE.ZS	Africa Eastern and Southern	AFE	..	..	..	..	..	..	..	..	..	..	..	..	..	..	..	..	..	..	..	..
Unemployment, male (% of male labor force) (national estimate)	SL.UEM.TOTL.MA.NE.ZS	Africa Western and Central	AFW	..	..	..	..	..	..	..	..	..	3.78881	..	..	6.64641	..	6.6741	..	..	2.2693	..	..
Unemployment, male (% of male labor force) (national estimate)	SL.UEM.TOTL.MA.NE.ZS	Arab World	ARB	..	..	7.32011	7.72931	7.01242	6.75233	..	8.37816	..	8.53329	..	7.13448	..	..	..	..	..	..	..	..
Unemployment, male (% of male labor force) (national estimate)	SL.UEM.TOTL.MA.NE.ZS	Caribbean small states	CSS	..	..	..	..	..	..	..	..	6.59267	5.06462	4.87075	5.33281	..	..	7.0667	..	..	..	..	..
Unemployment, male (% of male labor force) (national estimate)	SL.UEM.TOTL.MA.NE.ZS	Central Europe and the Baltics	CEB	11.4654	9.69348	7.48035	6.28876	8.53748	10.0107	9.7437	9.89681	9.9238	8.65202	7.74057	6.52082	5.31174	4.31214	3.70143	4.3163	4.44803	3.99318	4.02459	3.98088
Unemployment, male (% of male labor force) (national estimate)	SL.UEM.TOTL.MA.NE.ZS	Early-demographic dividend	EAR	5.17673	..	..	..	..	4.28516	..	4.49534	..	..	..	..	..	6.7199	6.14742	7.3799	6.44954	5.26568	4.6302	..
Unemployment, male (% of male labor force) (national estimate)	SL.UEM.TOTL.MA.NE.ZS	East Asia & Pacific	EAS	..	..	..	..	..	..	..	..	..	..	..	..	..	..	..	..	..	..	..	..
Unemployment, male (% of male labor force) (national estimate)	SL.UEM.TOTL.MA.NE.ZS	East Asia & Pacific (excluding high income)	EAP	..	..	..	..	..	..	..	..	..	..	..	..	..	..	..	..	..	..	..	..
Unemployment, male (% of male labor force) (national estimate)	SL.UEM.TOTL.MA.NE.ZS	East Asia & Pacific (IDA & IBRD countries)	TEA	..	..	..	..	..	..	..	..	..	..	..	..	..	..	..	..	..	..	..	..
Unemployment, male (% of male labor force) (national estimate)	SL.UEM.TOTL.MA.NE.ZS	Euro area	EMU	8.23697	7.48267	6.69336	6.85429	9.44485	9.98979	10.0396	11.2508	11.9157	11.4591	10.7174	9.73407	8.74038	7.8092	7.19044	7.53443	7.41636	6.39128	6.22262	6.11253
Unemployment, male (% of male labor force) (national estimate)	SL.UEM.TOTL.MA.NE.ZS	Europe & Central Asia	ECS	8.2968	7.89284	7.05121	7.05978	9.357	9.31399	8.87357	9.11001	9.27865	9.04478	8.60304	8.10371	7.43315	6.85923	6.61636	6.97902	6.77568	5.60989	5.33208	5.13712
Unemployment, male (% of male labor force) (national estimate)	SL.UEM.TOTL.MA.NE.ZS	Europe & Central Asia (excluding high income)	ECA	9.41226	9.59841	9.31949	9.15554	10.762	9.93452	8.77828	8.37998	8.32761	9.25128	9.08917	9.30094	8.92473	9.37204	9.49886	8.98999	9.42139	..	..	..
Unemployment, male (% of male labor force) (national estimate)	SL.UEM.TOTL.MA.NE.ZS	Europe & Central Asia (IDA & IBRD countries)	TEC	9.23517	9.01267	7.98024	7.71252	9.68802	9.08583	8.17617	7.62502	7.73149	7.88986	7.78665	7.68457	7.22731	6.87206	6.92071	7.15008	6.77017	5.42106	4.77018	..
Unemployment, male (% of male labor force) (national estimate)	SL.UEM.TOTL.MA.NE.ZS	European Union	EUU	8.80185	7.86706	6.78729	6.65116	9.06753	9.73865	9.72424	10.719	11.2414	10.6577	9.88299	8.88721	7.87849	6.98427	6.40025	6.79634	6.75636	5.85257	5.75052	5.69756
Unemployment, male (% of male labor force) (national estimate)	SL.UEM.TOTL.MA.NE.ZS	Fragile and conflict affected situations	FCS	..	..	..	..	..	..	..	..	..	..	..	..	..	..	..	..	..	..	..	..
Unemployment, male (% of male labor force) (national estimate)	SL.UEM.TOTL.MA.NE.ZS	Heavily indebted poor countries (HIPC)	HPC	..	..	..	..	..	..	..	..	..	..	..	..	..	..	..	..	..	..	..	..
Unemployment, male (% of male labor force) (national estimate)	SL.UEM.TOTL.MA.NE.ZS	High income	HIC	6.49946	6.07163	5.49857	5.82134	8.35506	8.41298	8.00125	7.7234	7.67257	6.97049	6.48653	5.92543	5.43193	4.92279	4.61632	6.22994	5.42746	4.31453	4.25649	4.28019
Unemployment, male (% of male labor force) (national estimate)	SL.UEM.TOTL.MA.NE.ZS	IBRD only	IBD	..	..	..	..	..	..	..	4.86645	..	..	..	..	..	..	..	7.63405	6.89346	5.37514	..	..
Unemployment, male (% of male labor force) (national estimate)	SL.UEM.TOTL.MA.NE.ZS	IDA & IBRD total	IBT	..	..	..	..	..	..	..	..	..	..	..	..	..	..	..	..	..	..	..	..
Unemployment, male (% of male labor force) (national estimate)	SL.UEM.TOTL.MA.NE.ZS	IDA blend	IDB	..	..	..	..	..	..	2.5034	..	3.50669	2.95747	3.37242	3.87482	..	..	6.3152	..	..	..	..	..
Unemployment, male (% of male labor force) (national estimate)	SL.UEM.TOTL.MA.NE.ZS	IDA only	IDX	..	..	..	..	..	..	..	..	..	..	..	..	..	..	..	..	..	..	..	..
Unemployment, male (% of male labor force) (national estimate)	SL.UEM.TOTL.MA.NE.ZS	IDA total	IDA	..	..	..	..	..	..	..	..	..	..	..	..	..	..	..	..	..	..	..	..
Unemployment, male (% of male labor force) (national estimate)	SL.UEM.TOTL.MA.NE.ZS	Late-demographic dividend	LTE	..	..	..	..	..	..	..	..	..	..	..	..	..	..	..	..	..	..	..	..
Unemployment, male (% of male labor force) (national estimate)	SL.UEM.TOTL.MA.NE.ZS	Latin America & Caribbean	LCN	6.72938	5.83439	5.74151	5.37778	6.37335	..	5.40848	5.41543	5.29215	5.14689	5.58407	6.57211	6.83959	6.83494	6.90273	9.21444	7.69065	5.75572	5.22393	4.62328
Unemployment, male (% of male labor force) (national estimate)	SL.UEM.TOTL.MA.NE.ZS	Latin America & Caribbean (excluding high income)	LAC	6.46799	5.59359	5.60513	5.23897	6.21036	..	5.23167	5.30443	5.1932	5.0956	5.52126	6.67258	6.98152	6.83366	6.89452	9.14932	7.5865	5.63705	5.06516	4.44036
Unemployment, male (% of male labor force) (national estimate)	SL.UEM.TOTL.MA.NE.ZS	Latin America & the Caribbean (IDA & IBRD countries)	TLA	6.80439	5.89544	5.7952	5.42198	6.41874	..	5.3949	5.40152	5.32637	5.19628	5.61138	6.66196	6.93305	6.9314	6.9012	9.19024	7.69065	5.75572	5.22119	4.62328
Unemployment, male (% of male labor force) (national estimate)	SL.UEM.TOTL.MA.NE.ZS	Least developed countries: UN classification	LDC	..	..	..	..	..	..	..	..	..	..	..	..	..	..	..	..	..	..	..	..
Unemployment, male (% of male labor force) (national estimate)	SL.UEM.TOTL.MA.NE.ZS	Low & middle income	LMY	..	..	..	..	..	..	..	..	..	..	..	..	..	..	..	..	..	..	..	..
Unemployment, male (% of male labor force) (national estimate)	SL.UEM.TOTL.MA.NE.ZS	Low income	LIC	..	..	..	..	..	..	..	..	..	..	..	..	..	..	..	..	..	..	..	..
Unemployment, male (% of male labor force) (national estimate)	SL.UEM.TOTL.MA.NE.ZS	Lower middle income	LMC	4.50795	..	..	..	..	2.95642	..	3.54798	..	..	..	..	..	6.45562	6.02769	6.82282	6.22471	4.61505	3.86857	..
Unemployment, male (% of male labor force) (national estimate)	SL.UEM.TOTL.MA.NE.ZS	Middle East, North Africa, Afghanistan & Pakistan	MEA	7.68723	5.47959	5.19697	4.81333	5.27051	5.4021	5.62386	6.72079	6.22562	6.2585	6.20569	5.88666	..	5.9135	5.55811	6.27033	6.63252	..	..	..
Unemployment, male (% of male labor force) (national estimate)	SL.UEM.TOTL.MA.NE.ZS	Middle East, North Africa, Afghanistan & Pakistan (excluding high income)	MNA	8.03955	5.52448	5.29638	4.9566	5.42283	5.60483	5.67796	7.07049	6.58348	6.63232	6.72714	6.5851	..	..	6.17919	6.82305	7.22834	..	..	..
Unemployment, male (% of male labor force) (national estimate)	SL.UEM.TOTL.MA.NE.ZS	Middle East, North Africa, Afghanistan & Pakistan (IDA & IBRD)	TMN	7.96319	5.43919	5.21902	4.84976	5.33852	5.51307	5.59993	7.00783	6.50426	6.55752	6.62931	6.48843	..	..	6.04572	6.69535	7.11564	..	..	..
Unemployment, male (% of male labor force) (national estimate)	SL.UEM.TOTL.MA.NE.ZS	Middle income	MIC	..	..	..	..	..	..	..	..	..	..	..	..	..	..	..	..	..	..	..	..
Unemployment, male (% of male labor force) (national estimate)	SL.UEM.TOTL.MA.NE.ZS	North America	NAC	5.26908	4.83295	4.90462	6.16553	10.2239	10.3539	9.23531	8.17907	7.62936	6.3911	5.59467	5.23057	4.65639	4.17513	3.97171	8.00825	5.70905	3.86858	3.99454	4.40147
Unemployment, male (% of male labor force) (national estimate)	SL.UEM.TOTL.MA.NE.ZS	Not classified	INX	..	..	..	..	..	..	..	..	..	..	..	..	..	..	..	..	..	..	..	..
Unemployment, male (% of male labor force) (national estimate)	SL.UEM.TOTL.MA.NE.ZS	OECD members	OED	6.46745	5.8973	5.57907	6.02192	8.57636	8.63888	8.03729	7.94781	7.89785	7.25631	6.71096	6.27445	5.71102	5.28845	5.25137	6.94	6.0137	4.79191	4.67033	4.73418
Unemployment, male (% of male labor force) (national estimate)	SL.UEM.TOTL.MA.NE.ZS	Other small states	OSS	..	..	..	..	..	..	..	..	..	..	..	8.78201	..	..	..	..	7.97425	..	..	..
Unemployment, male (% of male labor force) (national estimate)	SL.UEM.TOTL.MA.NE.ZS	Pacific island small states	PSS	..	..	..	..	..	..	..	..	..	..	..	..	..	..	..	..	..	..	..	..
Unemployment, male (% of male labor force) (national estimate)	SL.UEM.TOTL.MA.NE.ZS	Post-demographic dividend	PST	6.02111	5.67004	5.3021	5.75985	8.46847	8.6872	8.10386	8.10434	8.07421	7.44163	6.85643	6.42367	5.83237	5.28217	4.93066	6.64622	5.78966	4.45762	4.47054	4.61614
Unemployment, male (% of male labor force) (national estimate)	SL.UEM.TOTL.MA.NE.ZS	Pre-demographic dividend	PRE	..	..	..	..	..	..	..	..	..	..	..	..	..	..	..	..	..	..	..	..
Unemployment, male (% of male labor force) (national estimate)	SL.UEM.TOTL.MA.NE.ZS	Small states	SST	..	..	..	..	..	..	..	..	..	..	..	..	..	..	..	..	..	..	..	..
Unemployment, male (% of male labor force) (national estimate)	SL.UEM.TOTL.MA.NE.ZS	South Asia	SAS	3.70354	..	..	..	..	2.89501	..	3.043	..	..	..	..	..	7.56514	6.60096	8.1734	6.68536	4.84401	4.13901	4.20916
Unemployment, male (% of male labor force) (national estimate)	SL.UEM.TOTL.MA.NE.ZS	South Asia (IDA & IBRD)	TSA	3.70354	..	..	..	..	2.89501	..	3.043	..	..	..	..	..	7.56514	6.60096	8.1734	6.68536	4.84401	4.13901	4.20916
Unemployment, male (% of male labor force) (national estimate)	SL.UEM.TOTL.MA.NE.ZS	Sub-Saharan Africa	SSF	..	..	..	..	..	..	..	..	..	..	..	..	..	..	..	..	..	..	..	..
Unemployment, male (% of male labor force) (national estimate)	SL.UEM.TOTL.MA.NE.ZS	Sub-Saharan Africa (excluding high income)	SSA	..	..	..	..	..	..	..	..	..	..	..	..	..	..	..	..	..	..	..	..
Unemployment, male (% of male labor force) (national estimate)	SL.UEM.TOTL.MA.NE.ZS	Sub-Saharan Africa (IDA & IBRD countries)	TSS	..	..	..	..	..	..	..	..	..	..	..	..	..	..	..	..	..	..	..	..
Unemployment, male (% of male labor force) (national estimate)	SL.UEM.TOTL.MA.NE.ZS	Upper middle income	UMC	..	..	..	..	..	..	..	..	..	..	..	..	..	..	..	..	..	..	..	..
Unemployment, male (% of male labor force) (national estimate)	SL.UEM.TOTL.MA.NE.ZS	World	WLD	5.79545	..	..	..	..	..	..	..	..	..	..	..	..	..	5.88255	..	..	..	..	..
Unemployment, total (% of total labor force) (national estimate)	SL.UEM.TOTL.NE.ZS	Afghanistan	AFG	..	..	..	2.494	..	..	..	1.692	..	7.915	..	..	11.184	..	..	11.71	5.679	..	..	..
Unemployment, total (% of total labor force) (national estimate)	SL.UEM.TOTL.NE.ZS	Albania	ALB	6.566	13.8	15.966	13.06	13.674	14.086	13.481	13.376	15.866	18.055	17.193	15.418	13.616	12.304	11.466	11.639	11.474	10.785	10.669	..
Unemployment, total (% of total labor force) (national estimate)	SL.UEM.TOTL.NE.ZS	Algeria	DZA	15.27	12.27	13.79	11.33	10.16	9.96	9.96	10.97	9.82	10.207	11.206	10.202	12	..	..	..	..	..	..	..
Unemployment, total (% of total labor force) (national estimate)	SL.UEM.TOTL.NE.ZS	American Samoa	ASM	9.98	..	..	..	..	9.2	..	..	..	..	..	..	..	..	..	..	..	..	..	..
Unemployment, total (% of total labor force) (national estimate)	SL.UEM.TOTL.NE.ZS	Andorra	AND	..	..	..	..	..	..	..	..	..	..	..	..	..	..	..	..	..	..	..	..
Unemployment, total (% of total labor force) (national estimate)	SL.UEM.TOTL.NE.ZS	Angola	AGO	..	..	..	..	3.782	9.43	16.77	..	..	9.579	..	..	..	..	16.431	..	15.766	14.094	..	..
Unemployment, total (% of total labor force) (national estimate)	SL.UEM.TOTL.NE.ZS	Antigua and Barbuda	ATG	..	..	..	..	..	..	..	..	..	..	..	..	..	8.78	..	..	..	..	5.37	..
Unemployment, total (% of total labor force) (national estimate)	SL.UEM.TOTL.NE.ZS	Argentina	ARG	11.506	10.078	8.47	7.837	8.645	7.714	7.18	7.217	7.1	7.268	..	..	8.347	9.22	9.843	11.461	8.736	6.805	6.139	1.694
Unemployment, total (% of total labor force) (national estimate)	SL.UEM.TOTL.NE.ZS	Armenia	ARM	..	..	10.394	22.974	19.295	19.523	18.884	17.511	16.576	17.498	18.261	17.617	17.704	10.589	9.794	8.055	8.418	8.262	8.298	..
Unemployment, total (% of total labor force) (national estimate)	SL.UEM.TOTL.NE.ZS	Aruba	ABW	..	..	5.71	..	..	10.6	8.9	..	..	..	..	..	..	..	..	..	..	..	..	..
Unemployment, total (% of total labor force) (national estimate)	SL.UEM.TOTL.NE.ZS	Australia	AUS	5.032	4.782	4.377	4.234	5.561	5.211	5.081	5.224	5.662	6.077	6.054	5.714	5.604	5.345	5.143	6.394	5.022	3.728	3.668	3.942
Unemployment, total (% of total labor force) (national estimate)	SL.UEM.TOTL.NE.ZS	Austria	AUT	5.682	5.32	4.909	4.198	5.371	4.883	4.637	4.909	5.367	5.674	5.802	6.064	5.561	4.933	4.56	5.201	6.459	4.992	5.264	5.161
Unemployment, total (% of total labor force) (national estimate)	SL.UEM.TOTL.NE.ZS	Azerbaijan	AZE	7.26	6.62	6.33	5.86	5.74	5.63	5.42	5.19	4.97	4.91	4.96	5	5	4.9	5	7.24	6.04	5.65	..	..
Unemployment, total (% of total labor force) (national estimate)	SL.UEM.TOTL.NE.ZS	Bahamas, The	BHS	10.2	7.54	7.88	8.18	14.25	..	14.52	14.02	16.18	13.8	12	12.7	9.8	10	9.336	..	..	..	8.645	..
Unemployment, total (% of total labor force) (national estimate)	SL.UEM.TOTL.NE.ZS	Bahrain	BHR	..	..	5.6	3.7	4	1.13	4	1.2	..	..	..	..	..	..	..	..	..	..	..	..
Unemployment, total (% of total labor force) (national estimate)	SL.UEM.TOTL.NE.ZS	Bangladesh	BGD	4.25	3.591	..	..	5	3.379	2.504	..	4.426	..	..	4.35	4.372	..	..	..	..	4.593	3.352	..
Unemployment, total (% of total labor force) (national estimate)	SL.UEM.TOTL.NE.ZS	Barbados	BRB	..	..	..	..	10.02	10.69	..	..	11.55	12.17	9.803	8.247	8.62	8.321	8.41	..	11.015	7.261	6.54	..
Unemployment, total (% of total labor force) (national estimate)	SL.UEM.TOTL.NE.ZS	Belarus	BLR	1.5	1.2	1	0.8	6.1	..	0.6	0.5	0.5	0.5	1	5.844	5.648	4.763	4.165	4.049	3.9	3.574	3.461	..
Unemployment, total (% of total labor force) (national estimate)	SL.UEM.TOTL.NE.ZS	Belgium	BEL	8.44	8.246	7.459	6.976	7.908	8.293	7.14	7.542	8.425	8.523	8.482	7.83	7.09	5.941	5.364	5.545	6.248	5.57	5.547	5.701
Unemployment, total (% of total labor force) (national estimate)	SL.UEM.TOTL.NE.ZS	Belize	BLZ	10.91	9.39	8.51	8.18	..	..	..	..	8.349	8.244	7.578	7	6.596	9.346	9.053	..	..	..	..	..
Unemployment, total (% of total labor force) (national estimate)	SL.UEM.TOTL.NE.ZS	Benin	BEN	..	..	..	..	..	1.04	2.647	..	2.198	..	..	..	..	..	1.214	..	..	1.685	..	..
Unemployment, total (% of total labor force) (national estimate)	SL.UEM.TOTL.NE.ZS	Bermuda	BMU	..	..	..	..	4.48	6.49	..	8.44	6.66	8.94	..	..	..	..	..	..	..	..	..	..
Unemployment, total (% of total labor force) (national estimate)	SL.UEM.TOTL.NE.ZS	Bhutan	BTN	3.1	3.13	3.7	..	3.96	3.32	3.23	2.05	2.87	2.63	2.45	..	..	3.35	2.72	5.03	4.803	5.947	3.126	3.282
Unemployment, total (% of total labor force) (national estimate)	SL.UEM.TOTL.NE.ZS	Bolivia	BOL	5.45	5.08	5.18	2.603	2.973	..	2.255	2.066	2.437	2.021	3.111	3.498	3.655	3.519	3.682	7.903	4.936	3.452	2.948	2.73
Unemployment, total (% of total labor force) (national estimate)	SL.UEM.TOTL.NE.ZS	Bosnia and Herzegovina	BIH	..	31.11	28.984	23.405	24.068	27.312	27.582	28.01	27.49	27.517	27.695	25.408	20.527	18.4	15.692	15.868	14.897	12.657	10.668	..
Unemployment, total (% of total labor force) (national estimate)	SL.UEM.TOTL.NE.ZS	Botswana	BWA	..	17.782	..	..	16.169	17.86	20.01	..	..	..	..	..	..	..	20.094	21.017	23.106	23.615	23.381	24.433
Unemployment, total (% of total labor force) (national estimate)	SL.UEM.TOTL.NE.ZS	Brazil	BRA	10.551	9.692	9.28	8.268	9.419	..	7.578	7.251	7.071	6.755	8.538	11.58	12.792	12.329	11.936	13.697	13.158	9.231	7.947	6.801
Unemployment, total (% of total labor force) (national estimate)	SL.UEM.TOTL.NE.ZS	British Virgin Islands	VGB	..	..	..	..	..	..	..	..	..	..	..	..	..	..	..	..	..	..	..	..
Unemployment, total (% of total labor force) (national estimate)	SL.UEM.TOTL.NE.ZS	Brunei Darussalam	BRN	..	..	..	..	..	..	..	..	..	6.862	..	..	9.316	8.7	6.6	7.409	4.905	5.191	5.296	..
Unemployment, total (% of total labor force) (national estimate)	SL.UEM.TOTL.NE.ZS	Bulgaria	BGR	10.083	8.951	6.878	5.609	6.817	10.279	11.26	12.27	12.941	11.424	9.143	7.575	6.164	5.211	4.148	5.037	5.166	4.148	4.319	4.165
Unemployment, total (% of total labor force) (national estimate)	SL.UEM.TOTL.NE.ZS	Burkina Faso	BFA	4	2.353	3.3	..	..	..	..	..	..	6.481	..	..	..	4.695	1.56	..	..	1.927	5.348	3.441
Unemployment, total (% of total labor force) (national estimate)	SL.UEM.TOTL.NE.ZS	Burundi	BDI	..	3.185	..	1.634	..	..	..	..	..	1.572	..	..	..	..	..	1.03	..	..	..	..
Unemployment, total (% of total labor force) (national estimate)	SL.UEM.TOTL.NE.ZS	Cabo Verde	CPV	..	..	..	..	13.517	10.67	..	..	..	..	31.313	..	12.24	12.17	11.29	..	..	..	..	..
Unemployment, total (% of total labor force) (national estimate)	SL.UEM.TOTL.NE.ZS	Cambodia	KHM	..	..	1.257	0.825	0.579	0.771	0.577	1.279	0.438	0.692	0.393	0.716	0.141	..	0.499	0.172	0.396	..	0.256	..
Unemployment, total (% of total labor force) (national estimate)	SL.UEM.TOTL.NE.ZS	Cameroon	CMR	21.382	..	3.063	..	..	4.11	..	..	..	3.534	..	..	..	..	..	..	3.275	..	..	..
Unemployment, total (% of total labor force) (national estimate)	SL.UEM.TOTL.NE.ZS	Canada	CAN	6.758	6.484	6.156	6.284	8.46	8.178	7.637	7.392	7.143	7.023	6.945	7.038	6.426	5.837	5.69	9.657	7.527	5.279	5.415	6.351
Unemployment, total (% of total labor force) (national estimate)	SL.UEM.TOTL.NE.ZS	Cayman Islands	CYM	3.54	2.62	3.83	3.97	6.04	6.68	6.78	6.21	6.27	4.7	4.24	..	..	..	..	..	..	..	..	..
Unemployment, total (% of total labor force) (national estimate)	SL.UEM.TOTL.NE.ZS	Central African Republic	CAF	..	..	..	..	..	..	..	..	..	..	..	..	..	..	..	..	..	..	..	..
Unemployment, total (% of total labor force) (national estimate)	SL.UEM.TOTL.NE.ZS	Chad	TCD	..	..	..	..	..	..	..	..	..	..	..	..	..	1.135	..	..	..	..	..	..
Unemployment, total (% of total labor force) (national estimate)	SL.UEM.TOTL.NE.ZS	Channel Islands	CHI	..	..	..	..	..	..	..	..	..	..	..	..	..	..	..	..	..	..	..	..
Unemployment, total (% of total labor force) (national estimate)	SL.UEM.TOTL.NE.ZS	Chile	CHL	9.34	9.024	8.427	9.285	11.313	8.547	7.492	6.79	6.361	6.761	6.605	6.926	7.257	7.673	7.559	11.18	9.417	8.331	9.091	8.756
Unemployment, total (% of total labor force) (national estimate)	SL.UEM.TOTL.NE.ZS	China	CHN	4.2	4.1	4	4.2	4.3	4.1	4.1	4.1	4.05	4.1	..	..	3.9	4.93	5.15	5.61	5.11	..	..	..
Unemployment, total (% of total labor force) (national estimate)	SL.UEM.TOTL.NE.ZS	Colombia	COL	11.062	..	10.252	10.52	11.319	11.153	10.288	9.959	9.246	8.799	8.572	8.922	9.086	9.36	10.28	15.568	13.898	10.541	9.591	9.619
Unemployment, total (% of total labor force) (national estimate)	SL.UEM.TOTL.NE.ZS	Comoros	COM	..	..	..	..	..	..	..	..	..	8.142	..	..	..	..	..	..	4.394	..	..	..
Unemployment, total (% of total labor force) (national estimate)	SL.UEM.TOTL.NE.ZS	Congo, Dem. Rep.	COD	2.948	..	..	..	..	..	..	4.485	..	..	..	..	..	..	..	1.466	..	..	..	..
Unemployment, total (% of total labor force) (national estimate)	SL.UEM.TOTL.NE.ZS	Congo, Rep.	COG	19.796	..	..	..	19.86	..	..	10	..	..	..	..	..	..	..	..	..	..	..	..
Unemployment, total (% of total labor force) (national estimate)	SL.UEM.TOTL.NE.ZS	Costa Rica	CRI	6.749	5.926	4.557	4.934	7.824	7.171	9.518	9.11	8.218	8.499	8.415	8.085	7.729	9.01	10.807	16.432	15.139	11.325	8.325	6.936
Unemployment, total (% of total labor force) (national estimate)	SL.UEM.TOTL.NE.ZS	Cote d'Ivoire	CIV	..	..	..	..	..	..	..	7.223	4.255	..	..	1.896	3.272	..	2.401	..	..	2.31	..	..
Unemployment, total (% of total labor force) (national estimate)	SL.UEM.TOTL.NE.ZS	Croatia	HRV	12.598	11.13	9.909	8.53	9.202	11.62	13.678	16.046	17.231	17.209	16.15	13.015	11.078	8.322	6.551	7.389	7.483	6.811	6.121	5.033
Unemployment, total (% of total labor force) (national estimate)	SL.UEM.TOTL.NE.ZS	Cuba	CUB	1.95	1.913	1.788	1.583	1.67	2.5	3.18	3.498	3.29	2.7	2.4	2	1.7	1.7	..	..	..	..	..	..
Unemployment, total (% of total labor force) (national estimate)	SL.UEM.TOTL.NE.ZS	Curacao	CUW	..	..	..	..	..	..	9.78	..	13.03	12.61	11.71	..	..	13.43	..	19.07	..	..	..	..
Unemployment, total (% of total labor force) (national estimate)	SL.UEM.TOTL.NE.ZS	Cyprus	CYP	5.481	4.593	3.946	3.756	5.594	6.359	7.942	12.097	16.131	16.277	15.026	13.006	11.155	8.504	7.155	7.755	7.513	6.806	5.835	4.862
Unemployment, total (% of total labor force) (national estimate)	SL.UEM.TOTL.NE.ZS	Czechia	CZE	7.927	7.141	5.316	4.392	6.662	7.281	6.712	6.979	6.953	6.108	5.048	3.952	2.893	2.246	2.015	2.55	2.803	2.224	2.579	2.603
Unemployment, total (% of total labor force) (national estimate)	SL.UEM.TOTL.NE.ZS	Denmark	DNK	4.83	3.897	3.801	3.683	6.409	7.746	7.769	7.798	7.384	6.925	6.278	5.989	5.833	5.131	5.018	5.644	5.065	4.434	5.094	6.151
Unemployment, total (% of total labor force) (national estimate)	SL.UEM.TOTL.NE.ZS	Djibouti	DJI	..	..	..	..	..	..	..	..	..	..	..	..	26.064	..	..	..	..	..	..	..
Unemployment, total (% of total labor force) (national estimate)	SL.UEM.TOTL.NE.ZS	Dominica	DMA	..	..	..	..	..	..	..	..	..	..	..	..	..	..	..	..	..	..	..	..
Unemployment, total (% of total labor force) (national estimate)	SL.UEM.TOTL.NE.ZS	Dominican Republic	DOM	6.587	5.654	5.158	4.764	5.467	5.212	6.087	6.722	7.351	6.719	7.605	7.284	5.832	5.861	6.356	6.126	7.702	5.504	5.555	5.314
Unemployment, total (% of total labor force) (national estimate)	SL.UEM.TOTL.NE.ZS	Ecuador	ECU	3.779	3.55	3.142	3.917	4.608	4.088	3.458	3.235	3.083	3.48	3.616	4.597	3.836	3.53	3.812	6.116	4.504	3.713	3.51	3.453
Unemployment, total (% of total labor force) (national estimate)	SL.UEM.TOTL.NE.ZS	Egypt, Arab Rep.	EGY	11.049	10.49	8.8	8.517	9.087	8.757	11.849	12.597	13.154	13.105	13.052	12.45	11.767	9.855	7.851	7.974	7.441	7.344	6.753	..
Unemployment, total (% of total labor force) (national estimate)	SL.UEM.TOTL.NE.ZS	El Salvador	SLV	7.22	6.57	6.41	5.88	7.33	4.893	4.297	3.843	3.693	4.154	3.998	4.418	4.385	4.006	4.17	5.008	4.327	2.999	2.992	..
Unemployment, total (% of total labor force) (national estimate)	SL.UEM.TOTL.NE.ZS	Equatorial Guinea	GNQ	..	..	..	..	..	..	..	..	..	..	..	..	..	..	..	..	..	..	..	..
Unemployment, total (% of total labor force) (national estimate)	SL.UEM.TOTL.NE.ZS	Eritrea	ERI	..	..	..	..	..	..	..	..	..	..	..	..	..	..	..	..	..	..	..	..
Unemployment, total (% of total labor force) (national estimate)	SL.UEM.TOTL.NE.ZS	Estonia	EST	8.033	5.915	4.592	5.455	13.548	16.707	12.328	10.021	8.631	7.352	6.412	6.882	5.807	5.412	4.514	6.956	6.178	5.571	6.378	7.499
Unemployment, total (% of total labor force) (national estimate)	SL.UEM.TOTL.NE.ZS	Eswatini	SWZ	..	..	28.24	..	..	..	..	..	..	..	..	22.718	..	..	..	..	34.153	..	34.61	..
Unemployment, total (% of total labor force) (national estimate)	SL.UEM.TOTL.NE.ZS	Ethiopia	ETH	2.497	..	..	..	..	..	..	..	2.251	..	..	..	..	..	..	..	3.935	..	..	..
Unemployment, total (% of total labor force) (national estimate)	SL.UEM.TOTL.NE.ZS	Faroe Islands	FRO	..	..	..	..	..	..	..	..	..	..	..	..	..	..	..	..	..	..	..	..
Unemployment, total (% of total labor force) (national estimate)	SL.UEM.TOTL.NE.ZS	Fiji	FJI	3.886	..	8.75	8.94	8.72	8.91	4.406	9	..	6.17	..	4.319	..	..	..	..	..	..	..	5.361
Unemployment, total (% of total labor force) (national estimate)	SL.UEM.TOTL.NE.ZS	Finland	FIN	9.602	8.935	6.854	6.369	8.249	8.394	7.781	7.689	8.193	8.663	9.376	8.818	8.64	7.361	6.695	7.759	7.617	6.719	7.149	8.336
Unemployment, total (% of total labor force) (national estimate)	SL.UEM.TOTL.NE.ZS	France	FRA	8.882	8.832	8.008	7.386	9.122	9.279	9.228	9.841	9.913	10.273	10.354	10.057	9.409	9.018	8.415	8.009	7.871	7.303	7.335	7.388
Unemployment, total (% of total labor force) (national estimate)	SL.UEM.TOTL.NE.ZS	French Polynesia	PYF	..	..	11.74	..	..	..	..	..	..	..	..	..	..	..	..	..	..	..	..	..
Unemployment, total (% of total labor force) (national estimate)	SL.UEM.TOTL.NE.ZS	Gabon	GAB	16.91	..	..	..	..	20.39	..	..	..	..	..	..	..	..	..	..	..	..	..	..
Unemployment, total (% of total labor force) (national estimate)	SL.UEM.TOTL.NE.ZS	Gambia, The	GMB	..	..	..	..	..	..	..	9.268	..	..	..	..	..	4.055	..	..	..	..	6.479	..
Unemployment, total (% of total labor force) (national estimate)	SL.UEM.TOTL.NE.ZS	Georgia	GEO	13.81	13.57	13.28	17.87	20.71	20.203	19.632	19.653	19.416	17.439	16.506	16.604	13.939	12.667	11.565	11.734	..	..	..	..
Unemployment, total (% of total labor force) (national estimate)	SL.UEM.TOTL.NE.ZS	Germany	DEU	11.193	10.277	8.732	7.508	7.88	7.043	5.967	5.372	5.316	4.979	4.612	4.104	3.781	3.384	3.163	3.881	3.594	3.137	3.071	3.372
Unemployment, total (% of total labor force) (national estimate)	SL.UEM.TOTL.NE.ZS	Ghana	GHA	..	4.897	..	..	..	5.384	..	..	2.173	..	6.806	..	3.369	..	..	..	3.195	2.87	..	..
Unemployment, total (% of total labor force) (national estimate)	SL.UEM.TOTL.NE.ZS	Gibraltar	GIB	..	..	..	..	..	..	..	..	..	..	..	..	..	..	..	..	..	..	..	..
Unemployment, total (% of total labor force) (national estimate)	SL.UEM.TOTL.NE.ZS	Greece	GRC	10.074	8.906	8.351	7.664	9.546	12.719	17.973	24.731	27.686	26.708	24.981	23.514	21.413	19.179	17.045	15.899	14.656	12.426	11.023	10.02
Unemployment, total (% of total labor force) (national estimate)	SL.UEM.TOTL.NE.ZS	Greenland	GRL	9.25	8.4	..	..	..	7.8	9.4	9.8	10.1	10.3	9.1	..	..	..	..	..	..	..	..	..
Unemployment, total (% of total labor force) (national estimate)	SL.UEM.TOTL.NE.ZS	Grenada	GRD	..	..	..	..	..	..	..	..	24.2	24.5	22.9	..	..	13.658	9.788	12.974	13.035	..	6.34	..
Unemployment, total (% of total labor force) (national estimate)	SL.UEM.TOTL.NE.ZS	Guam	GUM	7	7.4	8.3	..	9.3	8.2	13.3	12.2	11.5	7.6	6.9	5.4	..	..	..	..	..	..	..	..
Unemployment, total (% of total labor force) (national estimate)	SL.UEM.TOTL.NE.ZS	Guatemala	GTM	..	1.902	..	..	..	3.497	4.126	2.765	3.017	2.717	2.506	2.583	2.462	2.283	2.193	..	2.174	3.051	2.344	..
Unemployment, total (% of total labor force) (national estimate)	SL.UEM.TOTL.NE.ZS	Guinea	GIN	..	..	..	..	..	..	..	..	..	5.044	..	..	..	..	5.018	..	..	..	..	..
Unemployment, total (% of total labor force) (national estimate)	SL.UEM.TOTL.NE.ZS	Guinea-Bissau	GNB	..	..	..	..	..	..	..	..	..	..	..	..	..	3.127	1.799	..	..	2.666	..	..
Unemployment, total (% of total labor force) (national estimate)	SL.UEM.TOTL.NE.ZS	Guyana	GUY	..	10.7	..	..	..	..	..	..	..	..	..	..	..	13.627	13.172	..	..	..	..	..
Unemployment, total (% of total labor force) (national estimate)	SL.UEM.TOTL.NE.ZS	Haiti	HTI	..	..	16.8	..	..	..	..	14.1	..	..	..	..	..	..	..	..	..	..	..	..
Unemployment, total (% of total labor force) (national estimate)	SL.UEM.TOTL.NE.ZS	Honduras	HND	4.909	3.574	3.211	3.156	3.292	4.119	4.474	3.755	5.646	7.078	6.147	6.727	5.528	5.648	5.698	10.982	8.506	8.774	6.07	4.91
Unemployment, total (% of total labor force) (national estimate)	SL.UEM.TOTL.NE.ZS	Hong Kong SAR, China	HKG	5.58	4.77	4.01	3.56	5.26	4.329	3.422	3.285	3.4	3.296	3.314	3.392	3.124	2.805	2.917	5.808	5.174	4.318	2.949	2.988
Unemployment, total (% of total labor force) (national estimate)	SL.UEM.TOTL.NE.ZS	Hungary	HUN	7.189	7.494	7.406	7.817	10.03	11.172	11.029	11.003	10.177	7.725	6.813	5.115	4.156	3.667	3.411	4.248	4.021	3.583	4.096	4.466
Unemployment, total (% of total labor force) (national estimate)	SL.UEM.TOTL.NE.ZS	Iceland	ISL	2.547	2.83	2.251	2.946	7.22	7.564	7.028	6	5.376	4.897	3.979	2.978	2.742	2.704	3.507	5.478	6.029	3.789	3.518	3.558
Unemployment, total (% of total labor force) (national estimate)	SL.UEM.TOTL.NE.ZS	India	IND	3.804	..	..	..	..	3.115	..	3.222	..	..	..	..	..	7.652	6.51	7.859	6.38	4.822	4.172	4.173
Unemployment, total (% of total labor force) (national estimate)	SL.UEM.TOTL.NE.ZS	Indonesia	IDN	7.945	7.551	8.06	7.208	6.106	5.614	5.153	4.468	4.336	4.049	4.514	4.301	3.783	4.387	3.59	4.255	3.827	3.462	3.308	..
Unemployment, total (% of total labor force) (national estimate)	SL.UEM.TOTL.NE.ZS	Iran, Islamic Rep.	IRN	11.813	11.519	10.772	10.63	12.113	13.679	12.491	12.275	10.595	10.68	11.166	12.618	12.232	12.195	10.74	9.687	9.282	9.085	8.129	..
Unemployment, total (% of total labor force) (national estimate)	SL.UEM.TOTL.NE.ZS	Iraq	IRQ	..	..	8.646	..	..	..	..	7.965	..	10.59	..	10.82	13.02	..	..	..	16.173	..	..	..
Unemployment, total (% of total labor force) (national estimate)	SL.UEM.TOTL.NE.ZS	Ireland	IRL	4.237	4.355	4.98	6.774	12.609	14.534	15.354	15.451	13.735	11.858	9.908	8.374	6.713	5.741	4.95	5.623	6.357	4.465	4.243	4.271
Unemployment, total (% of total labor force) (national estimate)	SL.UEM.TOTL.NE.ZS	Isle of Man	IMN	1.4	2.42	1.4	1.4	..	..	3.31	..	2.598	1.98	..	2.67	..	..	..	..	..	..	..	..
Unemployment, total (% of total labor force) (national estimate)	SL.UEM.TOTL.NE.ZS	Israel	ISR	8.993	8.404	7.319	6.1	7.61	6.637	5.604	6.762	6.137	5.789	5.176	4.723	4.14	3.917	3.731	4.169	4.812	3.695	3.371	2.901
Unemployment, total (% of total labor force) (national estimate)	SL.UEM.TOTL.NE.ZS	Italy	ITA	7.73	6.777	6.076	6.723	7.749	8.363	8.359	10.655	12.149	12.683	11.896	11.688	11.211	10.538	9.884	9.192	9.497	8.069	7.627	6.499
Unemployment, total (% of total labor force) (national estimate)	SL.UEM.TOTL.NE.ZS	Jamaica	JAM	11.263	10.325	9.745	6.666	7.314	7.63	8.034	8.695	9.698	9.046	13.511	8.634	7.399	5.47	4.987	6.501	5.188	4.083	3.022	..
Unemployment, total (% of total labor force) (national estimate)	SL.UEM.TOTL.NE.ZS	Japan	JPN	4.446	4.192	3.888	4.002	5.068	5.102	4.55	4.358	4.038	3.589	3.385	3.132	2.822	2.467	2.351	2.809	2.808	2.614	2.6	2.5
Unemployment, total (% of total labor force) (national estimate)	SL.UEM.TOTL.NE.ZS	Jordan	JOR	14.8	14	13.1	12.7	12.9	12.5	12.9	12.2	12.6	11.9	13.075	15.275	18.12	18.257	16.801	19.213	19.837	18.2	16.62	..
Unemployment, total (% of total labor force) (national estimate)	SL.UEM.TOTL.NE.ZS	Kazakhstan	KAZ	8.13	7.79	7.26	6.63	6.55	5.77	5.39	5.29	5.2	5.06	4.93	4.96	4.9	4.85	4.8	4.89	..	4.86	..	..
Unemployment, total (% of total labor force) (national estimate)	SL.UEM.TOTL.NE.ZS	Kenya	KEN	9.957	..	..	..	9.6	..	..	..	..	..	..	2.757	..	..	5.014	..	5.585	5.441	..	..
Unemployment, total (% of total labor force) (national estimate)	SL.UEM.TOTL.NE.ZS	Kiribati	KIR	14.65	..	..	..	..	30.58	..	..	..	..	9.334	..	..	..	8.557	10.971	..	..	2.786	..
Unemployment, total (% of total labor force) (national estimate)	SL.UEM.TOTL.NE.ZS	Korea, Dem. People's Rep.	PRK	..	..	..	..	..	..	..	..	..	..	..	..	..	..	..	..	..	..	..	..
Unemployment, total (% of total labor force) (national estimate)	SL.UEM.TOTL.NE.ZS	Korea, Rep.	KOR	3.482	3.254	3.013	2.959	3.363	3.324	2.992	2.812	3.067	3.082	3.546	3.65	3.653	3.824	3.746	3.931	3.639	2.857	2.675	2.784
Unemployment, total (% of total labor force) (national estimate)	SL.UEM.TOTL.NE.ZS	Kosovo	XKX	41.4	44.9	46.3	47.5	45.4	..	..	30.879	29.767	35.264	32.84	27.491	30.344	27.761	25.069	25.459	20.392	12.093	10.533	..
Unemployment, total (% of total labor force) (national estimate)	SL.UEM.TOTL.NE.ZS	Kuwait	KWT	1.95	1.3	1.5	1.75	1.64	1.82	..	..	..	2.9	2.2	2.16	..	..	..	..	..	..	..	..
Unemployment, total (% of total labor force) (national estimate)	SL.UEM.TOTL.NE.ZS	Kyrgyz Republic	KGZ	8.11	8.27	8.1	8.22	8.41	8.692	7.455	5.908	5.526	5.051	4.2	4.009	3.319	4.559	5.45	5.945	5.149	4.767	3.498	..
Unemployment, total (% of total labor force) (national estimate)	SL.UEM.TOTL.NE.ZS	Lao PDR	LAO	1.35	..	..	..	..	0.708	..	..	..	..	2.006	..	3.268	..	..	..	..	1.209	..	..
Unemployment, total (% of total labor force) (national estimate)	SL.UEM.TOTL.NE.ZS	Latvia	LVA	10.033	7.03	6.052	7.739	17.515	19.482	16.206	15.047	11.867	10.846	9.873	9.643	8.715	7.412	6.312	8.098	7.513	6.815	6.465	6.884
Unemployment, total (% of total labor force) (national estimate)	SL.UEM.TOTL.NE.ZS	Lebanon	LBN	..	..	8.98	..	6.355	..	..	..	..	..	..	..	..	..	11.301	..	..	..	..	..
Unemployment, total (% of total labor force) (national estimate)	SL.UEM.TOTL.NE.ZS	Lesotho	LSO	..	..	..	35.46	..	..	..	..	24.58	..	..	..	..	..	16.876	..	..	..	..	18.701
Unemployment, total (% of total labor force) (national estimate)	SL.UEM.TOTL.NE.ZS	Liberia	LBR	..	..	..	..	..	2.266	..	..	..	2.079	..	3.081	5.931	..	..	..	..	..	..	..
Unemployment, total (% of total labor force) (national estimate)	SL.UEM.TOTL.NE.ZS	Libya	LBY	..	..	..	..	..	..	..	19.03	..	..	..	..	..	..	..	..	..	..	..	..
Unemployment, total (% of total labor force) (national estimate)	SL.UEM.TOTL.NE.ZS	Liechtenstein	LIE	2.66	2.46	2.01	..	..	..	..	..	..	..	..	..	..	..	..	..	..	..	..	..
Unemployment, total (% of total labor force) (national estimate)	SL.UEM.TOTL.NE.ZS	Lithuania	LTU	8.325	5.78	4.25	5.826	13.785	17.814	15.39	13.365	11.77	10.698	9.12	7.862	7.073	6.147	6.255	8.487	7.112	5.955	6.841	7.095
Unemployment, total (% of total labor force) (national estimate)	SL.UEM.TOTL.NE.ZS	Luxembourg	LUX	4.488	4.731	4.065	5.06	5.194	4.423	5.122	5.03	6.045	6.044	6.796	6.669	5.523	5.589	5.592	6.766	5.571	4.588	5.184	6.421
Unemployment, total (% of total labor force) (national estimate)	SL.UEM.TOTL.NE.ZS	Macao SAR, China	MAC	4.158	3.822	3.269	2.999	3.58	2.84	2.56	1.97	1.82	1.67	1.81	1.939	1.981	1.803	1.73	2.542	..	..	..	..
Unemployment, total (% of total labor force) (national estimate)	SL.UEM.TOTL.NE.ZS	Madagascar	MDG	2.62	..	..	..	..	4.28	..	0.599	..	..	1.785	..	..	..	..	..	..	3.186	..	..
Unemployment, total (% of total labor force) (national estimate)	SL.UEM.TOTL.NE.ZS	Malawi	MWI	0.942	..	..	..	..	..	1.736	..	4.978	..	..	..	3.77	..	..	0.907	..	..	..	..
Unemployment, total (% of total labor force) (national estimate)	SL.UEM.TOTL.NE.ZS	Malaysia	MYS	3.53	..	3.31	3.34	3.62	3.32	3.05	3.04	3.14	2.88	3.1	3.44	3.41	3.3	3.33	4.54	4.64	3.93	..	..
Unemployment, total (% of total labor force) (national estimate)	SL.UEM.TOTL.NE.ZS	Maldives	MDV	..	..	..	..	11.697	..	..	..	..	3.846	..	5.771	..	..	4.562	..	..	..	..	..
Unemployment, total (% of total labor force) (national estimate)	SL.UEM.TOTL.NE.ZS	Mali	MLI	..	..	11.71	..	1.665	8.07	6.9	..	6.351	6.375	7.729	1.367	7.414	1.62	3.29	3.528	..	2.387	..	..
Unemployment, total (% of total labor force) (national estimate)	SL.UEM.TOTL.NE.ZS	Malta	MLT	6.923	6.798	6.472	5.977	6.896	6.861	6.388	6.203	6.115	5.737	5.389	4.694	4.008	3.956	4.08	4.856	3.754	3.471	3.479	3.115
Unemployment, total (% of total labor force) (national estimate)	SL.UEM.TOTL.NE.ZS	Marshall Islands	MHL	25.37	..	..	..	..	..	4.74	..	..	..	..	..	..	..	6.342	..	9.823	..	..	..
Unemployment, total (% of total labor force) (national estimate)	SL.UEM.TOTL.NE.ZS	Mauritania	MRT	..	..	..	..	..	..	..	9.864	..	..	..	..	10.336	..	10.416	..	..	..	..	..
Unemployment, total (% of total labor force) (national estimate)	SL.UEM.TOTL.NE.ZS	Mauritius	MUS	9.524	9.04	8.475	7.17	7.257	7.654	7.447	7.472	7.322	7.467	7.41	6.814	6.752	6.426	6.331	8.626	7.719	6.322	5.571	..
Unemployment, total (% of total labor force) (national estimate)	SL.UEM.TOTL.NE.ZS	Mexico	MEX	3.558	3.566	3.628	3.874	5.356	5.303	5.175	4.892	4.921	4.819	4.311	3.853	3.419	3.275	3.477	4.378	3.941	3.174	2.704	2.616
Unemployment, total (% of total labor force) (national estimate)	SL.UEM.TOTL.NE.ZS	Micronesia, Fed. Sts.	FSM	..	..	..	..	..	..	..	..	..	8.863	..	..	..	..	..	..	..	..	..	..
Unemployment, total (% of total labor force) (national estimate)	SL.UEM.TOTL.NE.ZS	Moldova	MDA	5.633	4.26	2.749	2.097	3.024	2.972	2.677	2.189	1.894	1.45	1.781	1.591	1.622	1.239	1.502	1.206	0.794	0.909	1.57	1.427
Unemployment, total (% of total labor force) (national estimate)	SL.UEM.TOTL.NE.ZS	Monaco	MCO	..	..	..	..	..	..	..	..	..	..	..	6.33	..	..	..	..	..	..	..	..
Unemployment, total (% of total labor force) (national estimate)	SL.UEM.TOTL.NE.ZS	Mongolia	MNG	..	7.193	7.2	5.565	5.86	6.549	4.769	3.905	4.231	4.798	4.861	7.235	6.359	5.377	9.024	6.413	7.871	5.954	5.178	..
Unemployment, total (% of total labor force) (national estimate)	SL.UEM.TOTL.NE.ZS	Montenegro	MNE	30.31	..	19.4	17.15	19.09	19.649	19.759	19.808	19.585	18.054	17.555	17.732	16.082	15.19	15.128	17.878	16.543	14.851	13.146	..
Unemployment, total (% of total labor force) (national estimate)	SL.UEM.TOTL.NE.ZS	Morocco	MAR	11.01	9.67	9.56	9.57	8.96	9.09	8.91	8.99	9.23	9.7	9.46	9.3	..	..	..	..	12.28	11.79	..	..
Unemployment, total (% of total labor force) (national estimate)	SL.UEM.TOTL.NE.ZS	Mozambique	MOZ	..	..	..	..	..	..	..	..	..	..	3.426	..	..	..	..	..	..	6.789	..	..
Unemployment, total (% of total labor force) (national estimate)	SL.UEM.TOTL.NE.ZS	Myanmar	MMR	..	..	..	..	..	..	..	..	..	3.868	0.766	..	1.356	0.767	0.407	1.476	..	..	..	..
Unemployment, total (% of total labor force) (national estimate)	SL.UEM.TOTL.NE.ZS	Namibia	NAM	..	..	..	..	..	22.12	..	16.771	19.028	18.521	..	23.352	..	19.877	..	..	..	..	..	..
Unemployment, total (% of total labor force) (national estimate)	SL.UEM.TOTL.NE.ZS	Nauru	NRU	..	8.256	..	..	..	..	22.96	..	13.282	..	..	..	..	..	..	..	5.056	..	..	..
Unemployment, total (% of total labor force) (national estimate)	SL.UEM.TOTL.NE.ZS	Nepal	NPL	..	..	..	1.378	..	..	..	..	..	..	3.1	..	10.66	..	..	..	..	..	..	..
Unemployment, total (% of total labor force) (national estimate)	SL.UEM.TOTL.NE.ZS	Netherlands	NLD	5.872	5.007	4.153	3.658	4.352	4.991	4.977	5.821	7.241	7.419	6.872	6.007	4.837	3.832	3.379	3.82	4.209	3.526	3.535	3.639
Unemployment, total (% of total labor force) (national estimate)	SL.UEM.TOTL.NE.ZS	New Caledonia	NCL	..	..	..	..	13.97	..	..	..	..	14.59	..	..	11.676	11.702	10.88	13.558	..	10.71	..	..
Unemployment, total (% of total labor force) (national estimate)	SL.UEM.TOTL.NE.ZS	New Zealand	NZL	3.813	3.851	3.606	4.037	5.866	6.211	6.034	6.491	5.84	5.431	5.407	5.145	4.737	4.329	4.106	4.596	3.783	3.299	3.734	4.724
Unemployment, total (% of total labor force) (national estimate)	SL.UEM.TOTL.NE.ZS	Nicaragua	NIC	5.37	5.31	4.89	6.2	8.16	7.83	..	5.208	5.28	4.52	4.7	3.9	3.3	5.2	..	..	..	..	..	..
Unemployment, total (% of total labor force) (national estimate)	SL.UEM.TOTL.NE.ZS	Niger	NER	3.1	..	..	..	..	..	0.316	2.177	..	0.524	..	..	7.769	..	0.531	..	..	0.403	..	..
Unemployment, total (% of total labor force) (national estimate)	SL.UEM.TOTL.NE.ZS	Nigeria	NGA	..	..	..	..	..	..	3.77	..	3.711	4.562	4.311	7.06	8.389	..	10.695	..	..	3.827	3.074	3.454
Unemployment, total (% of total labor force) (national estimate)	SL.UEM.TOTL.NE.ZS	North Macedonia	MKD	37.32	36.392	35.231	33.93	32.351	33.135	31.502	31.096	29.017	28.215	26.395	24.312	22.857	21.208	17.414	16.575	15.801	14.476	13.174	12.265
Unemployment, total (% of total labor force) (national estimate)	SL.UEM.TOTL.NE.ZS	Northern Mariana Islands	MNP	8.22	..	..	..	..	11.17	..	..	..	..	..	..	..	..	..	..	..	..	..	..
Unemployment, total (% of total labor force) (national estimate)	SL.UEM.TOTL.NE.ZS	Norway	NOR	4.381	3.397	2.493	2.521	3.1	3.527	3.196	3.129	3.425	3.486	4.296	4.68	4.164	3.801	3.684	4.424	4.359	3.231	3.574	3.982
Unemployment, total (% of total labor force) (national estimate)	SL.UEM.TOTL.NE.ZS	Oman	OMN	..	..	..	4.142	..	..	..	..	..	..	..	3.266	..	1.8	..	2.94	1.9	3.3	..	..
Unemployment, total (% of total labor force) (national estimate)	SL.UEM.TOTL.NE.ZS	Pakistan	PAK	7.05	0.582	0.398	0.423	0.535	0.653	0.796	3.667	2.954	1.827	3.566	2.285	..	4.083	4.83	6.74	6.338	..	..	..
Unemployment, total (% of total labor force) (national estimate)	SL.UEM.TOTL.NE.ZS	Palau	PLW	4.18	..	..	..	..	..	..	..	..	1.357	..	..	..	..	..	0.765	..	..	..	..
Unemployment, total (% of total labor force) (national estimate)	SL.UEM.TOTL.NE.ZS	Panama	PAN	10.33	9.11	6.78	4.868	6.56	5.832	3.922	3.714	3.732	4.444	4.402	4.843	5.461	5.313	6.409	18.548	10.293	8.281	6.678	8.607
Unemployment, total (% of total labor force) (national estimate)	SL.UEM.TOTL.NE.ZS	Papua New Guinea	PNG	..	..	..	..	..	2.002	2.62	..	..	..	..	..	..	..	..	..	..	2.689	..	..
Unemployment, total (% of total labor force) (national estimate)	SL.UEM.TOTL.NE.ZS	Paraguay	PRY	4.825	5.277	4.713	4.415	5.46	4.569	4.67	4.085	4.385	5.034	4.556	5.255	6.138	6.217	6.595	7.548	7.311	6.755	5.794	5.686
Unemployment, total (% of total labor force) (national estimate)	SL.UEM.TOTL.NE.ZS	Peru	PER	4.866	4.172	4.078	4.025	3.964	3.595	3.477	3.238	3.575	3.208	3.272	3.741	3.691	3.492	3.379	7.179	5.097	4.291	4.899	5.199
Unemployment, total (% of total labor force) (national estimate)	SL.UEM.TOTL.NE.ZS	Philippines	PHL	3.795	4.052	3.434	3.72	3.858	3.605	3.592	3.504	3.497	3.6	3.068	2.695	2.552	2.338	2.237	2.522	3.398	2.598	2.409	..
Unemployment, total (% of total labor force) (national estimate)	SL.UEM.TOTL.NE.ZS	Poland	POL	17.592	13.794	9.551	7.069	8.131	9.578	9.576	10.031	10.293	8.971	7.475	6.141	4.867	3.835	3.267	3.155	3.268	2.811	2.743	2.807
Unemployment, total (% of total labor force) (national estimate)	SL.UEM.TOTL.NE.ZS	Portugal	PRT	7.582	7.649	7.965	7.553	9.432	10.771	12.715	15.509	16.237	13.88	12.405	11.058	8.878	6.966	6.422	6.85	6.712	6.138	6.498	6.427
Unemployment, total (% of total labor force) (national estimate)	SL.UEM.TOTL.NE.ZS	Puerto Rico (US)	PRI	11.35	11.01	10.93	11.48	15	16.1	15.7	14.5	14.3	13.9	12	11.8	10.8	9.2	8.3	15.34	7.9	6	..	..
Unemployment, total (% of total labor force) (national estimate)	SL.UEM.TOTL.NE.ZS	Qatar	QAT	..	0.87	0.52	0.31	0.31	0.45	0.56	0.48	0.28	0.2	0.17	0.15	0.14	0.11	0.1	0.14	0.14	0.13	..	..
Unemployment, total (% of total labor force) (national estimate)	SL.UEM.TOTL.NE.ZS	Romania	ROU	7.174	7.27	6.413	5.787	6.859	6.959	7.177	6.794	7.096	6.802	6.812	5.901	4.927	4.187	3.912	5.035	5.59	5.614	5.589	5.43
Unemployment, total (% of total labor force) (national estimate)	SL.UEM.TOTL.NE.ZS	Russian Federation	RUS	7.166	7.162	6.101	6.325	8.458	7.407	6.571	5.484	5.513	5.212	5.615	5.591	5.238	4.871	4.513	5.62	4.749	3.867	3.076	2.43
Unemployment, total (% of total labor force) (national estimate)	SL.UEM.TOTL.NE.ZS	Rwanda	RWA	..	..	..	..	..	..	..	..	..	1.169	..	..	11.875	10.759	11.236	11.829	15.775	15.084	12.352	11.331
Unemployment, total (% of total labor force) (national estimate)	SL.UEM.TOTL.NE.ZS	Samoa	WSM	..	1.29	..	..	..	..	5.68	8.752	..	8.72	..	..	9.4	..	..	..	..	5.048	..	..
Unemployment, total (% of total labor force) (national estimate)	SL.UEM.TOTL.NE.ZS	San Marino	SMR	2.11	1.63	..	..	4.02	4.37	5.06	5.19	6.08	6.61	7.38	6.45	7.89	7.83	7.54	7.23	6.34	4.91	..	..
Unemployment, total (% of total labor force) (national estimate)	SL.UEM.TOTL.NE.ZS	Sao Tome and Principe	STP	16.47	16.65	..	..	..	..	..	13.59	..	..	..	..	8.808	..	..	..	..	..	..	..
Unemployment, total (% of total labor force) (national estimate)	SL.UEM.TOTL.NE.ZS	Saudi Arabia	SAU	6.051	6.254	5.734	5.085	5.377	5.55	..	5.622	5.6	5.877	5.6	5.6	5.89	6.029	5.636	7.66	6.621	5.589	4.008	3.518
Unemployment, total (% of total labor force) (national estimate)	SL.UEM.TOTL.NE.ZS	Senegal	SEN	..	10.03	..	..	..	..	2.853	..	..	..	6.757	4.455	4.078	..	2.863	..	..	5.062	4.686	5.775
Unemployment, total (% of total labor force) (national estimate)	SL.UEM.TOTL.NE.ZS	Serbia	SRB	20.85	20.85	18.06	13.67	16.116	19.204	22.959	24	22.154	19.223	17.66	15.257	13.477	12.733	10.395	9.011	9.843	8.439	8.268	7.24
Unemployment, total (% of total labor force) (national estimate)	SL.UEM.TOTL.NE.ZS	Seychelles	SYC	5.5	..	..	..	..	..	4.11	..	..	3.841	4.151	3.965	3.715	3.528	2.966	4.311	..	..	2.934	2.593
Unemployment, total (% of total labor force) (national estimate)	SL.UEM.TOTL.NE.ZS	Sierra Leone	SLE	..	..	..	..	..	..	..	..	..	4.678	..	..	..	3.192	..	..	..	..	..	..
Unemployment, total (% of total labor force) (national estimate)	SL.UEM.TOTL.NE.ZS	Singapore	SGP	5.59	4.48	3.9	3.96	5.86	4.12	3.89	3.72	3.86	3.74	3.79	4.08	4.2	..	3.1	4.1	4.64	3.591	3.444	2.737
Unemployment, total (% of total labor force) (national estimate)	SL.UEM.TOTL.NE.ZS	Sint Maarten (Dutch part)	SXM	..	..	..	..	..	..	..	..	..	..	..	..	..	..	..	..	..	..	..	..
Unemployment, total (% of total labor force) (national estimate)	SL.UEM.TOTL.NE.ZS	Slovak Republic	SVK	16.276	13.395	11.16	9.514	12.023	14.387	13.634	13.966	14.226	11.536	11.492	9.679	8.142	6.544	5.761	6.719	6.894	6.143	5.843	5.335
Unemployment, total (% of total labor force) (national estimate)	SL.UEM.TOTL.NE.ZS	Slovenia	SVN	6.506	5.95	4.818	4.371	5.858	7.236	8.166	8.841	10.103	9.668	8.962	8	6.564	5.108	4.446	4.971	4.744	4.011	3.652	3.697
Unemployment, total (% of total labor force) (national estimate)	SL.UEM.TOTL.NE.ZS	Solomon Islands	SLB	..	..	..	..	2.02	..	..	..	0.694	..	..	..	..	..	..	..	..	..	..	..
Unemployment, total (% of total labor force) (national estimate)	SL.UEM.TOTL.NE.ZS	Somalia, Fed. Rep.	SOM	..	..	..	..	..	..	..	..	..	..	..	..	..	..	18.828	..	..	..	..	..
Unemployment, total (% of total labor force) (national estimate)	SL.UEM.TOTL.NE.ZS	South Africa	ZAF	29.122	28.342	26.54	22.407	23.523	24.683	24.639	24.727	24.561	24.89	25.149	26.536	27.035	26.906	28.468	29.217	34.007	33.268	32.098	32.279
Unemployment, total (% of total labor force) (national estimate)	SL.UEM.TOTL.NE.ZS	South Sudan	SSD	..	..	..	12.298	..	..	..	..	..	..	..	..	..	..	..	..	..	..	..	..
Unemployment, total (% of total labor force) (national estimate)	SL.UEM.TOTL.NE.ZS	Spain	ESP	9.146	8.452	8.232	11.254	17.857	19.86	21.39	24.789	26.094	24.441	22.057	19.635	17.224	15.255	14.104	15.532	14.914	13.033	12.179	11.344
Unemployment, total (% of total labor force) (national estimate)	SL.UEM.TOTL.NE.ZS	Sri Lanka	LKA	7.67	6.5	5.97	5.22	5.85	4.784	4.118	3.88	4.186	4.157	4.519	4.242	4.046	4.318	4.67	5.364	4.981	4.528	..	..
Unemployment, total (% of total labor force) (national estimate)	SL.UEM.TOTL.NE.ZS	St. Kitts and Nevis	KNA	..	..	..	..	..	..	..	..	..	..	..	..	..	..	..	..	..	..	..	..
Unemployment, total (% of total labor force) (national estimate)	SL.UEM.TOTL.NE.ZS	St. Lucia	LCA	18.7	16	14	12.72	15.37	..	18.86	19.06	22.21	..	..	..	18.894	19.116	15.344	20.405	19.58	15.766	12.021	10.074
Unemployment, total (% of total labor force) (national estimate)	SL.UEM.TOTL.NE.ZS	St. Martin (French part)	MAF	..	..	..	..	..	..	..	..	..	..	..	..	..	..	..	..	..	..	..	..
Unemployment, total (% of total labor force) (national estimate)	SL.UEM.TOTL.NE.ZS	St. Vincent and the Grenadines	VCT	..	..	..	18.79	..	..	..	..	..	..	..	..	..	..	..	..	..	..	..	..
Unemployment, total (% of total labor force) (national estimate)	SL.UEM.TOTL.NE.ZS	Sudan	SDN	..	..	..	15.566	13	..	17.44	..	..	..	..	..	..	..	..	..	..	7.53	..	..
Unemployment, total (% of total labor force) (national estimate)	SL.UEM.TOTL.NE.ZS	Suriname	SUR	..	..	..	..	8.72	7.15	7.54	8.1	6.6	6.94	7.22	7.917	..	..	..	..	..	..	..	..
Unemployment, total (% of total labor force) (national estimate)	SL.UEM.TOTL.NE.ZS	Sweden	SWE	7.81	7.066	6.161	6.235	8.351	8.61	7.804	7.976	8.052	7.954	7.432	6.99	6.718	6.365	6.833	8.291	8.803	7.417	7.611	8.306
Unemployment, total (% of total labor force) (national estimate)	SL.UEM.TOTL.NE.ZS	Switzerland	CHE	4.437	3.995	3.641	3.35	4.109	4.808	4.409	4.491	4.747	4.826	4.801	4.918	4.797	4.713	4.394	4.817	5.013	4.122	4.043	4.343
Unemployment, total (% of total labor force) (national estimate)	SL.UEM.TOTL.NE.ZS	Syrian Arab Republic	SYR	..	8.17	8.42	10.94	8.14	8.61	..	..	..	..	..	..	..	..	..	..	..	..	..	..
Unemployment, total (% of total labor force) (national estimate)	SL.UEM.TOTL.NE.ZS	Tajikistan	TJK	2	2.2	2.874	..	11.5	..	..	..	..	..	..	0.081	..	..	..	..	..	..	..	..
Unemployment, total (% of total labor force) (national estimate)	SL.UEM.TOTL.NE.ZS	Tanzania	TZA	..	3.299	..	0.343	2.5	1.314	3.47	1.437	2.93	2.125	..	..	..	..	..	1.792	..	..	..	..
Unemployment, total (% of total labor force) (national estimate)	SL.UEM.TOTL.NE.ZS	Thailand	THA	1.35	1.22	1.18	1.18	1.49	0.622	0.66	0.58	0.249	0.576	0.597	0.688	0.83	0.765	0.716	1.099	1.215	0.94	0.733	0.781
Unemployment, total (% of total labor force) (national estimate)	SL.UEM.TOTL.NE.ZS	Timor-Leste	TLS	..	..	5.646	..	..	3.301	..	..	4.05	..	3.678	4.657	..	..	..	..	2.344	1.537	..	..
Unemployment, total (% of total labor force) (national estimate)	SL.UEM.TOTL.NE.ZS	Togo	TGO	..	4.229	..	..	..	10.624	1.982	..	..	..	2.204	..	3.744	..	2.036	..	..	1.965	..	..
Unemployment, total (% of total labor force) (national estimate)	SL.UEM.TOTL.NE.ZS	Tonga	TON	..	1.09	..	..	..	..	..	..	..	..	..	1.054	..	2.248	..	..	2.111	..	1.652	..
Unemployment, total (% of total labor force) (national estimate)	SL.UEM.TOTL.NE.ZS	Trinidad and Tobago	TTO	7.95	6.27	5.54	4.63	5.28	4.033	3.425	3.718	2.683	2.477	2.428	3.207	..	..	3.523	4.206	4.446	4.383	3.361	..
Unemployment, total (% of total labor force) (national estimate)	SL.UEM.TOTL.NE.ZS	Tunisia	TUN	12.872	12.51	12.365	12.444	13.29	13.049	18.334	17.63	15.934	14.259	15.159	15.557	15.33	15.459	17.153	..	..	15.3	15.106	..
Unemployment, total (% of total labor force) (national estimate)	SL.UEM.TOTL.NE.ZS	Turkiye	TUR	10.634	10.233	10.281	10.97	14.024	11.881	9.784	9.21	9.717	9.912	10.302	10.905	10.916	10.958	13.731	13.155	11.979	10.432	9.354	8.711
Unemployment, total (% of total labor force) (national estimate)	SL.UEM.TOTL.NE.ZS	Turkmenistan	TKM	..	..	..	..	4	4	..	..	..	..	..	..	..	..	..	..	..	..	..	..
Unemployment, total (% of total labor force) (national estimate)	SL.UEM.TOTL.NE.ZS	Turks and Caicos Islands	TCA	8.04	7.45	5.43	8.3	..	..	..	..	..	..	..	..	..	..	..	..	..	..	..	..
Unemployment, total (% of total labor force) (national estimate)	SL.UEM.TOTL.NE.ZS	Tuvalu	TUV	..	..	..	..	..	5.525	..	..	..	..	..	8.489	26.553	..	..	..	..	7.318	..	..
Unemployment, total (% of total labor force) (national estimate)	SL.UEM.TOTL.NE.ZS	Uganda	UGA	1.9	..	..	..	3.6	1.401	0.881	3.551	1.91	1.566	..	..	3.428	..	2.563	..	3.416	..	..	..
Unemployment, total (% of total labor force) (national estimate)	SL.UEM.TOTL.NE.ZS	Ukraine	UKR	7.18	6.81	6.351	6.363	8.84	8.1	7.851	7.529	7.17	9.27	9.14	9.35	9.5	8.799	8.194	9.475	9.834	..	..	..
Unemployment, total (% of total labor force) (national estimate)	SL.UEM.TOTL.NE.ZS	United Arab Emirates	ARE	3.12	..	..	..	..	..	..	..	..	..	..	1.64	2.462	2.236	2.331	4.294	3.105	2.872	2.151	1.88
Unemployment, total (% of total labor force) (national estimate)	SL.UEM.TOTL.NE.ZS	United Kingdom	GBR	4.884	5.472	5.399	5.748	7.683	7.973	8.195	8.279	7.752	6.398	5.552	4.909	4.501	4.145	3.657	4.518	4.864	3.768	4.025	4.361
Unemployment, total (% of total labor force) (national estimate)	SL.UEM.TOTL.NE.ZS	United States	USA	5.084	4.623	4.622	5.784	9.254	9.633	8.949	8.069	7.375	6.168	5.28	4.869	4.355	3.896	3.669	8.055	5.349	3.65	3.638	4.022
Unemployment, total (% of total labor force) (national estimate)	SL.UEM.TOTL.NE.ZS	Uruguay	URY	12.009	10.844	9.403	8.025	7.74	7.158	6.307	6.451	6.444	6.547	7.488	7.841	7.89	8.336	8.836	10.413	9.328	7.877	8.355	8.209
Unemployment, total (% of total labor force) (national estimate)	SL.UEM.TOTL.NE.ZS	Uzbekistan	UZB	0.3	0.2	4.99	4.89	5.04	5.36	4.96	4.87	4.86	5.09	5.15	5.16	5.83	9.35	8.98	5.293	..	..	..	..
Unemployment, total (% of total labor force) (national estimate)	SL.UEM.TOTL.NE.ZS	Vanuatu	VUT	..	8.006	..	..	4.565	1.848	..	..	..	..	..	..	..	..	5.444	4.046	..	..	..	..
Unemployment, total (% of total labor force) (national estimate)	SL.UEM.TOTL.NE.ZS	Venezuela, RB	VEN	10.663	8.606	7.279	6.245	6.097	7.112	6.902	6.601	7.54	..	..	5.319	5.045	..	..	7.53	..	..	..	..
Unemployment, total (% of total labor force) (national estimate)	SL.UEM.TOTL.NE.ZS	Viet Nam	VNM	..	..	2.026	..	1.737	1.114	0.999	1.027	1.316	1.256	1.848	1.848	1.874	1.161	1.681	2.103	2.383	1.57	1.645	..
Unemployment, total (% of total labor force) (national estimate)	SL.UEM.TOTL.NE.ZS	Virgin Islands (U.S.)	VIR	..	..	..	..	..	..	..	..	..	..	..	..	..	..	..	..	..	..	..	..
Unemployment, total (% of total labor force) (national estimate)	SL.UEM.TOTL.NE.ZS	West Bank and Gaza	PSE	20.016	19.014	18.282	22.913	20.452	21.416	17.597	19.202	19.894	20.526	23.005	23.939	25.677	26.256	25.34	25.895	26.39	24.42	..	31.436
Unemployment, total (% of total labor force) (national estimate)	SL.UEM.TOTL.NE.ZS	Yemen, Rep.	YEM	16.05	15.7	15.33	14.97	14.63	17.82	..	..	..	13.467	..	..	..	..	..	..	..	..	..	..
Unemployment, total (% of total labor force) (national estimate)	SL.UEM.TOTL.NE.ZS	Zambia	ZMB	15.9	..	..	7.93	..	13.19	..	7.85	..	..	11.888	..	4.529	5.032	5.538	6.032	5.197	5.993	5.861	..
Unemployment, total (% of total labor force) (national estimate)	SL.UEM.TOTL.NE.ZS	Zimbabwe	ZWE	..	..	..	..	..	..	5.368	..	..	4.774	..	..	..	..	7.373	..	9.459	10.001	9.29	..
Unemployment, total (% of total labor force) (national estimate)	SL.UEM.TOTL.NE.ZS	Africa Eastern and Southern	AFE	..	..	..	..	..	..	..	..	..	..	..	..	..	..	..	..	..	..	..	..
Unemployment, total (% of total labor force) (national estimate)	SL.UEM.TOTL.NE.ZS	Africa Western and Central	AFW	..	..	..	..	..	..	..	..	..	4.42405	..	..	7.23981	..	7.78378	..	..	3.23501	..	..
Unemployment, total (% of total labor force) (national estimate)	SL.UEM.TOTL.NE.ZS	Arab World	ARB	..	10.4289	9.75105	10.0691	9.57817	9.36981	..	10.696	..	10.7871	..	9.67882	..	..	..	..	..	..	..	..
Unemployment, total (% of total labor force) (national estimate)	SL.UEM.TOTL.NE.ZS	Caribbean small states	CSS	..	8.20952	..	..	..	..	..	..	7.81902	6.50745	5.97337	6.381	..	..	7.87934	..	..	..	..	..
Unemployment, total (% of total labor force) (national estimate)	SL.UEM.TOTL.NE.ZS	Central Europe and the Baltics	CEB	12.0311	10.1172	7.80514	6.60005	8.51652	9.92655	9.80886	10.0131	10.0746	8.87317	7.81308	6.47687	5.27812	4.29575	3.76167	4.35145	4.44757	3.9683	4.01434	4.01028
Unemployment, total (% of total labor force) (national estimate)	SL.UEM.TOTL.NE.ZS	Early-demographic dividend	EAR	5.9407	..	..	..	..	4.92008	..	5.03133	..	..	..	..	..	7.03406	6.42948	7.5128	6.63791	5.59763	4.97573	..
Unemployment, total (% of total labor force) (national estimate)	SL.UEM.TOTL.NE.ZS	East Asia & Pacific	EAS	4.45841	4.34057	4.16183	4.31733	4.2942	4.0191	3.91376	3.83128	3.77072	3.76349	..	..	3.52234	4.18474	4.20784	4.69729	4.43455	..	..	..
Unemployment, total (% of total labor force) (national estimate)	SL.UEM.TOTL.NE.ZS	East Asia & Pacific (excluding high income)	EAP	4.47588	4.37808	4.20933	4.38068	4.22341	3.93499	3.87505	3.79979	3.74202	3.75916	..	..	3.52925	4.29597	4.33704	4.8218	4.54925	..	..	..
Unemployment, total (% of total labor force) (national estimate)	SL.UEM.TOTL.NE.ZS	East Asia & Pacific (IDA & IBRD countries)	TEA	4.47588	4.37808	4.20933	4.38068	4.22341	3.93499	3.87505	3.79979	3.74202	3.75916	..	..	3.52925	4.29597	4.33704	4.8218	4.54925	..	..	..
Unemployment, total (% of total labor force) (national estimate)	SL.UEM.TOTL.NE.ZS	Euro area	EMU	9.14956	8.42909	7.53679	7.54388	9.63277	10.1735	10.26	11.4155	11.9996	11.6247	10.8815	10.0322	9.06875	8.14584	7.50784	7.83492	7.74375	6.77165	6.55681	6.35493
Unemployment, total (% of total labor force) (national estimate)	SL.UEM.TOTL.NE.ZS	Europe & Central Asia	ECS	8.36729	7.95451	7.21791	7.18366	9.12713	9.18612	8.83092	9.04372	9.24009	8.91493	8.52634	8.05533	7.49542	6.98009	6.73003	7.07548	6.94774	5.84883	5.56296	5.33737
Unemployment, total (% of total labor force) (national estimate)	SL.UEM.TOTL.NE.ZS	Europe & Central Asia (excluding high income)	ECA	7.94081	8.10224	8.41547	8.59125	10.3462	9.88397	8.79416	8.46504	8.41822	8.82754	8.83519	8.9486	9.03088	9.10321	9.64779	9.23895	9.96447	..	..	..
Unemployment, total (% of total labor force) (national estimate)	SL.UEM.TOTL.NE.ZS	Europe & Central Asia (IDA & IBRD countries)	TEC	8.56331	8.25245	7.53392	7.4124	9.23708	8.80521	8.04868	7.5553	7.60734	7.54313	7.5257	7.38767	7.103	6.85859	6.92449	7.15484	6.87354	5.60972	4.99939	..
Unemployment, total (% of total labor force) (national estimate)	SL.UEM.TOTL.NE.ZS	European Union	EUU	9.63148	8.68652	7.50181	7.2414	9.21099	9.87273	9.92846	10.8756	11.351	10.8256	10.0172	9.10669	8.13323	7.24516	6.67825	7.05643	7.03119	6.16004	6.02393	5.90822
Unemployment, total (% of total labor force) (national estimate)	SL.UEM.TOTL.NE.ZS	Fragile and conflict affected situations	FCS	..	..	..	..	..	..	..	..	..	..	..	..	..	..	..	..	..	..	..	..
Unemployment, total (% of total labor force) (national estimate)	SL.UEM.TOTL.NE.ZS	Heavily indebted poor countries (HIPC)	HPC	..	..	..	..	..	..	..	..	..	..	..	..	..	..	..	..	..	..	..	..
Unemployment, total (% of total labor force) (national estimate)	SL.UEM.TOTL.NE.ZS	High income	HIC	6.79441	6.33254	5.71669	5.95153	8.09109	8.20879	7.89031	7.78107	7.70768	7.0928	6.60104	6.11026	5.60447	5.10401	4.78404	6.49675	5.60445	4.53609	4.37293	4.39329
Unemployment, total (% of total labor force) (national estimate)	SL.UEM.TOTL.NE.ZS	IBRD only	IBD	5.81027	6.10652	5.76959	5.73469	6.0204	4.98565	5.61937	4.93402	5.35657	5.37936	..	..	5.61564	6.34522	6.17067	6.97487	6.44432	5.74827	..	..
Unemployment, total (% of total labor force) (national estimate)	SL.UEM.TOTL.NE.ZS	IDA & IBRD total	IBT	5.77053	..	..	..	..	4.81393	5.21412	4.83332	5.00745	..	..	..	..	6.19258	6.15288	6.72069	6.3235	..	..	..
Unemployment, total (% of total labor force) (national estimate)	SL.UEM.TOTL.NE.ZS	IDA blend	IDB	..	..	..	..	..	..	2.73979	..	3.54742	3.53583	4.10757	4.6281	..	..	7.62246	..	..	..	..	..
Unemployment, total (% of total labor force) (national estimate)	SL.UEM.TOTL.NE.ZS	IDA only	IDX	..	..	..	..	..	..	..	..	..	..	..	..	..	..	..	..	..	..	..	..
Unemployment, total (% of total labor force) (national estimate)	SL.UEM.TOTL.NE.ZS	IDA total	IDA	..	..	..	..	..	..	..	..	..	..	..	..	..	..	..	..	..	..	..	..
Unemployment, total (% of total labor force) (national estimate)	SL.UEM.TOTL.NE.ZS	Late-demographic dividend	LTE	5.57554	5.2388	4.91415	5.05734	5.3447	4.70118	4.86026	4.74883	4.68254	4.62029	..	..	4.8845	5.41986	5.56535	6.24046	5.84766	..	..	..
Unemployment, total (% of total labor force) (national estimate)	SL.UEM.TOTL.NE.ZS	Latin America & Caribbean	LCN	8.33742	7.2533	7.29575	6.7026	7.72594	..	6.6013	6.40945	6.25541	6.01036	6.52126	7.5951	7.93796	7.95187	8.12224	10.4818	9.25689	6.93083	6.14725	5.46974
Unemployment, total (% of total labor force) (national estimate)	SL.UEM.TOTL.NE.ZS	Latin America & Caribbean (excluding high income)	LAC	8.13278	7.05544	7.25493	6.63661	7.66182	..	6.50396	6.34195	6.14083	5.9302	6.48634	7.75175	8.11356	7.9564	8.13065	10.4513	9.20406	6.83341	6.00716	5.28705
Unemployment, total (% of total labor force) (national estimate)	SL.UEM.TOTL.NE.ZS	Latin America & the Caribbean (IDA & IBRD countries)	TLA	8.45117	7.34682	7.38606	6.77911	7.80665	..	6.61975	6.42251	6.26814	6.03317	6.57653	7.68177	8.03726	8.06049	8.12052	10.4611	9.26231	6.93455	6.14523	5.46974
Unemployment, total (% of total labor force) (national estimate)	SL.UEM.TOTL.NE.ZS	Least developed countries: UN classification	LDC	..	..	..	..	..	..	..	..	..	..	..	..	..	..	..	..	..	..	..	..
Unemployment, total (% of total labor force) (national estimate)	SL.UEM.TOTL.NE.ZS	Low & middle income	LMY	5.59599	..	..	..	..	4.62145	..	4.71888	..	..	..	..	..	6.25366	6.23251	6.75881	6.43818	..	..	..
Unemployment, total (% of total labor force) (national estimate)	SL.UEM.TOTL.NE.ZS	Low income	LIC	..	..	..	..	..	..	..	..	..	..	..	..	..	..	..	..	..	..	..	..
Unemployment, total (% of total labor force) (national estimate)	SL.UEM.TOTL.NE.ZS	Lower middle income	LMC	4.96272	..	..	..	..	3.40199	..	3.84118	..	..	..	..	..	6.49519	6.27903	6.64263	6.15975	4.78812	3.93566	..
Unemployment, total (% of total labor force) (national estimate)	SL.UEM.TOTL.NE.ZS	Middle East, North Africa, Afghanistan & Pakistan	MEA	9.84176	7.15334	6.78565	6.26772	6.56736	6.83725	6.95352	7.99997	7.59312	7.53553	7.869	7.41067	..	7.21884	7.01559	7.80865	7.85273	..	..	..
Unemployment, total (% of total labor force) (national estimate)	SL.UEM.TOTL.NE.ZS	Middle East, North Africa, Afghanistan & Pakistan (excluding high income)	MNA	10.2732	7.24998	6.90995	6.43903	6.71642	7.03866	7.05288	8.26566	7.85147	7.8095	8.29488	8.0336	..	..	7.54853	8.26279	8.35856	..	..	..
Unemployment, total (% of total labor force) (national estimate)	SL.UEM.TOTL.NE.ZS	Middle East, North Africa, Afghanistan & Pakistan (IDA & IBRD)	TMN	10.2209	7.18872	6.85169	6.35264	6.64134	6.95783	6.98481	8.20162	7.77126	7.73431	8.18944	7.92556	..	..	7.39159	8.11798	8.22317	..	..	..
Unemployment, total (% of total labor force) (national estimate)	SL.UEM.TOTL.NE.ZS	Middle income	MIC	5.65888	..	..	..	5.58849	4.57662	5.04753	4.77035	4.95972	5.03394	..	..	..	6.28158	6.2851	6.852	6.44846	..	..	..
Unemployment, total (% of total labor force) (national estimate)	SL.UEM.TOTL.NE.ZS	North America	NAC	5.25751	4.81614	4.78243	5.83653	9.16995	9.47759	8.80785	7.99589	7.34976	6.26083	5.46064	5.10341	4.57972	4.10721	3.89057	8.2306	5.59211	3.83303	3.84074	4.29229
Unemployment, total (% of total labor force) (national estimate)	SL.UEM.TOTL.NE.ZS	Not classified	INX	..	..	..	..	..	..	..	..	..	..	..	..	..	..	..	..	..	..	..	..
Unemployment, total (% of total labor force) (national estimate)	SL.UEM.TOTL.NE.ZS	OECD members	OED	6.82006	6.177	5.84732	6.1723	8.34405	8.50939	8.11159	8.1036	8.00624	7.41429	6.86082	6.43823	5.91814	5.47637	5.38832	7.13619	6.19303	4.98767	4.81998	4.88811
Unemployment, total (% of total labor force) (national estimate)	SL.UEM.TOTL.NE.ZS	Other small states	OSS	..	..	8.46184	..	..	..	..	..	..	..	..	9.61101	..	..	..	..	8.54557	..	..	..
Unemployment, total (% of total labor force) (national estimate)	SL.UEM.TOTL.NE.ZS	Pacific island small states	PSS	..	..	..	..	5.82477	..	..	..	..	..	..	..	..	..	..	..	..	..	..	..
Unemployment, total (% of total labor force) (national estimate)	SL.UEM.TOTL.NE.ZS	Post-demographic dividend	PST	6.25898	5.92875	5.51142	5.84601	8.0719	8.36793	8.00688	8.0641	7.96156	7.41298	6.83968	6.41162	5.85149	5.30549	4.96888	6.76804	5.84267	4.5523	4.4946	4.62774
Unemployment, total (% of total labor force) (national estimate)	SL.UEM.TOTL.NE.ZS	Pre-demographic dividend	PRE	..	..	..	..	..	..	..	..	..	..	..	..	..	..	..	..	..	..	..	..
Unemployment, total (% of total labor force) (national estimate)	SL.UEM.TOTL.NE.ZS	Small states	SST	..	..	..	..	..	..	..	..	..	..	..	..	..	..	..	..	..	..	..	..
Unemployment, total (% of total labor force) (national estimate)	SL.UEM.TOTL.NE.ZS	South Asia	SAS	3.91116	..	..	..	..	3.17003	..	3.2325	..	..	..	..	..	7.59583	6.47683	7.81781	6.35757	4.79262	4.07789	4.1724
Unemployment, total (% of total labor force) (national estimate)	SL.UEM.TOTL.NE.ZS	South Asia (IDA & IBRD)	TSA	3.91116	..	..	..	..	3.17003	..	3.2325	..	..	..	..	..	7.59583	6.47683	7.81781	6.35757	4.79262	4.07789	4.1724
Unemployment, total (% of total labor force) (national estimate)	SL.UEM.TOTL.NE.ZS	Sub-Saharan Africa	SSF	..	..	..	..	..	..	..	..	..	..	..	..	..	..	..	..	..	..	..	..
Unemployment, total (% of total labor force) (national estimate)	SL.UEM.TOTL.NE.ZS	Sub-Saharan Africa (excluding high income)	SSA	..	..	..	..	..	..	..	..	..	..	..	..	..	..	..	..	..	..	..	..
Unemployment, total (% of total labor force) (national estimate)	SL.UEM.TOTL.NE.ZS	Sub-Saharan Africa (IDA & IBRD countries)	TSS	..	..	..	..	..	..	..	..	..	..	..	..	..	..	..	..	..	..	..	..
Unemployment, total (% of total labor force) (national estimate)	SL.UEM.TOTL.NE.ZS	Upper middle income	UMC	6.04933	5.75532	5.71188	5.58407	5.91392	5.37611	5.38752	5.30071	5.1617	5.21394	..	..	5.68097	6.15595	6.28946	6.98448	6.63476	..	..	..
Unemployment, total (% of total labor force) (national estimate)	SL.UEM.TOTL.NE.ZS	World	WLD	5.86263	5.79602	5.58483	..	6.32819	5.49059	5.81551	5.43977	5.63368	5.57737	..	..	5.63258	5.97708	5.9055	6.69966	6.20707	..	..	..
Labor force participation rate, total (% of total population ages 15+) (national estimate)	SL.TLF.CACT.NE.ZS	Afghanistan	AFG	..	..	..	63.266	..	..	..	46.956	..	51.725	..	..	47.305	..	..	41.579	49.73	..	..	..
Labor force participation rate, total (% of total population ages 15+) (national estimate)	SL.TLF.CACT.NE.ZS	Albania	ALB	34.5	34.45	48.728	53.192	54.993	55.202	59.938	56.995	52.418	53.42	55.497	57.314	58.057	59.296	60.306	59.367	59.684	62.161	63.882	..
Labor force participation rate, total (% of total population ages 15+) (national estimate)	SL.TLF.CACT.NE.ZS	Algeria	DZA	..	..	..	41.7	41.43	41.71	40.15	42	43.2	41.151	41.708	41.871	41.77	..	..	..	..	..	..	..
Labor force participation rate, total (% of total population ages 15+) (national estimate)	SL.TLF.CACT.NE.ZS	American Samoa	ASM	59.93	..	..	..	..	52.64	..	..	..	..	..	..	..	..	..	..	..	..	..	..
Labor force participation rate, total (% of total population ages 15+) (national estimate)	SL.TLF.CACT.NE.ZS	Andorra	AND	..	61.45	59.46	56.69	..	..	..	..	..	..	..	..	..	..	..	..	..	..	..	..
Labor force participation rate, total (% of total population ages 15+) (national estimate)	SL.TLF.CACT.NE.ZS	Angola	AGO	..	..	..	..	67.017	77.26	86.61	..	..	43.556	..	..	..	..	75.235	..	76.475	75.38	..	..
Labor force participation rate, total (% of total population ages 15+) (national estimate)	SL.TLF.CACT.NE.ZS	Antigua and Barbuda	ATG	..	..	..	..	..	..	..	..	..	..	..	..	..	72.611	..	..	..	..	73.969	..
Labor force participation rate, total (% of total population ages 15+) (national estimate)	SL.TLF.CACT.NE.ZS	Argentina	ARG	61.511	61.795	61	60.428	60.78	60.187	60.651	60.362	59.962	59.444	..	..	58.808	59.595	60.289	56.023	60.358	61.484	62.286	58.981
Labor force participation rate, total (% of total population ages 15+) (national estimate)	SL.TLF.CACT.NE.ZS	Armenia	ARM	..	..	52.696	55.895	59.2	61.2	61.959	62.814	62.785	63.021	62.292	60.719	60.82	67.17	63.704	66.953	67.472	63.297	65.294	..
Labor force participation rate, total (% of total population ages 15+) (national estimate)	SL.TLF.CACT.NE.ZS	Aruba	ABW	..	..	66.2	..	..	63.91	63.8	..	..	..	..	..	..	..	..	..	..	..	..	..
Labor force participation rate, total (% of total population ages 15+) (national estimate)	SL.TLF.CACT.NE.ZS	Australia	AUS	64.398	64.756	65.176	65.481	65.431	65.391	65.42	65.152	64.939	64.704	64.996	64.834	65.025	65.746	66.052	64.98	66.056	66.846	67.171	67.056
Labor force participation rate, total (% of total population ages 15+) (national estimate)	SL.TLF.CACT.NE.ZS	Austria	AUT	58.456	58.971	59.83	60.08	60.348	60.287	60.357	60.647	60.801	60.599	60.632	61.134	61.101	61.323	61.309	60.814	61.151	61.512	61.607	61.487
Labor force participation rate, total (% of total population ages 15+) (national estimate)	SL.TLF.CACT.NE.ZS	Azerbaijan	AZE	68.4	67.15	66.35	65.43	65.05	64.81	64.4	64.5	64.7	65.1	65.4	66	66.2	66.3	66.5	66.8	67.1	65.7	..	..
Labor force participation rate, total (% of total population ages 15+) (national estimate)	SL.TLF.CACT.NE.ZS	Bahamas, The	BHS	..	..	..	..	73.4	..	72.44	74.5	72.7	..	..	..	..	..	77.437	..	..	..	97.662	..
Labor force participation rate, total (% of total population ages 15+) (national estimate)	SL.TLF.CACT.NE.ZS	Bahrain	BHR	48.3	66.58	..	..	..	72.06	71.04	..	..	..	71.57	..	..	..	..	..	..	..	..	..
[truncated: 2,647 more rows]
